# Supplementary material for: Single-cell transcriptomic analysis suggests two molecularly distinct subtypes of intrahepatic cholangiocarcinoma
Source: Nat Commun. 2022 Mar 28;13:1642. doi: 10.1038/s41467-022-29164-0 (PMC8960779; doi:10.1038/s41467-022-29164-0)
Supplement: Supplementary file 4 — Supplementary Data 1 [file 41467_2022_29164_MOESM4_ESM.xlsx]

## Sheet: Description
Supplementary Data 1. The baseline clinical characteristics of our study subjects and overview of the scRNA-seq data used in this study.
1. The characteristics of included study subjects
2. Overview of the scRNA-seq data

## Sheet: 1.Patient information
Patient	Sex	Age (year)	Tumor size (cm)	Vascular invasion	Hepatic Fibrosis	HBsAg	CA19-9 (U/mL)	Ki67 (%)	LNM	TNM stage	Maligant cell number	Non-maligant cell number
P02	Male	63	1.8	No	No	Negative	30.5	70	Yes	III B	2540	9834
P03	Female	64	2.7	No	Yes	Negative	45.3	10	No	I A	455	11133
P17	Female	47	3.5	No	No	Negative	194	40	Yes	III B	582	17320
P16	Male	49	4	Yes	No	Negative	45.8	80	Yes	III B	1816	1679
P18	Female	63	4	No	Yes	Positive	302	90	Yes	III B	1410	4749
P14	Male	62	5	No	No	Negative	56.7	40	No	I A	1074	11686
P15	Male	61	5	No	Yes	Positive	20.2	40	No	I A	2111	9777
P19	Female	67	5	No	Yes	Negative	39.3	25	No	I A	6711	6324
P04	Female	59	6	No	No	Positive	7695	30	No	I B	478	9691
P06	Female	54	6	No	No	Negative	1542	60	Yes	III B	293	7603
P09	Male	57	6	No	No	Positive	44.7	40	No	I B	1926	6896
P12	Female	65	6	No	No	Negative	8.5	50	No	I B	853	5308
P10	Male	68	7	No	Yes	Negative	69.1	30	No	I B	1147	7982
P13	Male	70	7	Yes	No	Negative	37.4	40	No	II	2271	11229

## Sheet: 2.Overview of scRNA-seq data
Patients	B	CD4	CD8	DC	Endo	Fibro	Mac	MAIT	Mono	NK	Plasma B	Treg	Malignant cells
P02-Peritumor	574	110	2238	80	2	0	3	1193	148	2279	11	7
P02-Tumor	910	497	779	80	10	8	99	185	124	422	8	67	2540
P03-Peritumor	938	216	1730	152	31	5	11	2348	634	1724	17	4
P03-Tumor	174	536	631	131	183	37	322	252	331	585	11	130	455
P04-Peritumor	99	213	5586	100	37	0	32	443	238	692	17	19
P04-Tumor	169	166	425	140	324	12	365	33	271	130	15	165	478
P06-Peritumor	76	101	760	183	3	0	10	1124	540	504	28	2
P06-Tumor	29	14	40	64	9	28	3457	4	19	17	579	12	293
P09-Peritumor	296	279	3527	85	3	0	4	137	130	870	16	7
P09-Tumor	220	394	306	48	69	5	197	7	9	122	3	162	1926
P10-Peritumor	232	91	847	75	5	0	4	2340	240	2788	34	5
P10-Tumor	65	98	206	29	64	0	307	80	134	311	4	23	1147
P12-Peritumor	83	25	474	325	11	0	14	177	423	289	85	1
P12-Tumor	27	311	765	55	53	5	908	14	72	811	28	352	853
P13-Peritumor	272	193	7030	210	14	0	45	69	165	1787	85	11
P13-Tumor	15	58	446	21	121	43	440	1	32	120	2	49	2271
P14-Peritumor	282	263	2221	259	11	0	3	2820	879	1678	54	15
P14-Tumor	321	423	824	61	225	15	159	14	143	937	9	70	1074
P15-Peritumor	460	177	2651	162	12	0	33	429	422	1681	23	1
P15-Tumor	291	284	506	59	1708	217	119	13	366	119	17	27	2111
P16-Peritumor	57	85	443	101	56	3	14	75	144	266	15	4
P16-Tumor	12	30	207	0	37	12	43	2	24	21	7	21	1816
P17-Peritumor	111	121	582	141	18	0	27	167	21	2777	47	8
P17-Tumor	259	2404	9179	17	34	44	120	13	6	1113	38	73	582
P18-Peritumor	89	152	1430	99	39	0	11	1039	173	751	20	5
P18-Tumor	187	60	148	10	8	70	22	4	10	402	2	18	1410
P19-Peritumor	110	136	2265	161	33	0	22	1335	79	856	24	4
P19-Tumor	4	47	84	156	96	235	603	4	10	44	12	4	6711
