# Supplementary material for: Single-cell transcriptomic analysis suggests two molecularly distinct subtypes of intrahepatic cholangiocarcinoma
Source: Nat Commun. 2022 Mar 28;13:1642. doi: 10.1038/s41467-022-29164-0 (PMC8960779; doi:10.1038/s41467-022-29164-0)
Supplement: Supplementary file 5 — Supplementary Data 2 [file 41467_2022_29164_MOESM5_ESM.xlsx]

## Sheet: Sheet1
Supplementary Data 2. Gene ranks based on the proportion of positive cells in S100P- cells and S100P+ cells.
Gene	Positive in S100P- cells	Positive in S100P+ cells
SPP1	0.857134	0.0906008
DCDC2	0.835605	0.0721843
VIM	0.86033	0.151086
DEFB1	0.952358	0.151697
ZBTB20	0.921421	0.208752
FXYD2	0.764202	0.0657623
CALM2	0.961585	0.257854
CLU	0.881317	0.218377
EPCAM	0.927874	0.252454
AGT	0.735798	0.0565264
MALAT1	0.998914	0.298581
RPL41	0.999276	0.299484
FTH1	0.997829	0.298898
RPL13	0.998914	0.299501
TMSB10	0.998914	0.29956
RPLP1	0.998372	0.299408
RPS27	0.998432	0.299573
RPL10	0.998131	0.299458
RPS24	0.997708	0.299399
PTMA	0.997588	0.299483
EEF1A1	0.997769	0.299623
RPS18	0.997829	0.299699
HLA-A	0.951031	0.274676
RPS19	0.997708	0.299755
RPS28	0.997105	0.299466
RPL39	0.996563	0.299254
RPL37	0.997226	0.299737
RPL8	0.996804	0.299589
RPS27A	0.996261	0.299466
RPS14	0.996261	0.299584
RPS23	0.995175	0.2991
EIF1	0.995417	0.299465
S100A6	0.996321	0.300106
RPL28	0.99608	0.300157
RPL37A	0.995175	0.299873
RPS15	0.995417	0.300059
RPL19	0.994753	0.299784
RPL36	0.995537	0.300182
RPL30	0.994934	0.299953
FAU	0.993004	0.29917
B2M	0.993487	0.299426
RPL18A	0.994572	0.300267
RPS8	0.99415	0.300178
RPS21	0.993004	0.299677
UBC	0.993004	0.299736
RPL32	0.99409	0.30028
RPL18	0.993547	0.300038
S100A11	0.983114	0.294866
TPT1	0.993969	0.300454
RPS9	0.993185	0.300323
RPS12	0.993306	0.300387
RPL26	0.990954	0.299395
MT-CO1	0.991919	0.299966
RPL34	0.99222	0.30014
MT-ND4	0.991316	0.299796
RPL9	0.989808	0.299069
RPL35A	0.99204	0.300298
RPS7	0.990291	0.299535
RPS16	0.991075	0.299966
MT-ATP6	0.990773	0.299821
RPL24	0.990773	0.30003
RPS15A	0.990713	0.300192
RPS3	0.991497	0.3008
RPL35	0.991014	0.300604
MT-ND2	0.989205	0.299735
MT-CO2	0.989567	0.299957
MT-ND1	0.987698	0.299247
RPL11	0.99011	0.300469
MT-ND3	0.988662	0.299761
RPL3	0.989326	0.300247
MT-CO3	0.989145	0.300196
IL32	0.896514	0.245036
RPS2	0.989567	0.300554
RPL12	0.988662	0.300239
RPL38	0.989507	0.300686
RPLP2	0.989567	0.300763
RPL23A	0.988602	0.300521
RPS25	0.989024	0.300848
RPS29	0.987939	0.300512
RPL21	0.987758	0.300999
RPL6	0.984742	0.299515
RPL5	0.984139	0.299554
RPS13	0.985165	0.300146
NACA	0.984501	0.300167
MYL6	0.984682	0.300368
RPS4X	0.985466	0.30095
RPL7A	0.984079	0.300677
TMSB4X	0.98631	0.301993
RPL13A	0.984381	0.301361
FTL	0.982813	0.300648
RPS3A	0.984381	0.30157
MT-CYB	0.982089	0.300412
RPS6	0.983355	0.301281
CD63	0.981064	0.300211
RPS10	0.981486	0.300662
RPLP0	0.982451	0.301175
HSP90AB1	0.976842	0.298454
RPL15	0.982873	0.301534
ACTG1	0.983536	0.301901
RPL29	0.983717	0.302131
SERF2	0.983838	0.302194
UBA52	0.981064	0.300932
RPL27	0.980521	0.300959
H3F3B	0.981968	0.301698
COX7C	0.972983	0.297147
RPL10A	0.980702	0.30119
RPS11	0.981667	0.302032
RPS5	0.98034	0.301628
PPIA	0.979315	0.301398
EEF1D	0.972621	0.298508
ATP5MC2	0.971897	0.29845
KRT18	0.975154	0.300273
RPL22	0.975154	0.300666
RACK1	0.977023	0.302132
ACTB	0.977988	0.303034
RPL14	0.978109	0.303308
RPL27A	0.977385	0.302985
NEAT1	0.967736	0.298093
H3F3A	0.971294	0.301955
RPL7	0.968761	0.301049
PFDN5	0.968339	0.301687
UQCRB	0.962188	0.298496
MT-ND5	0.965927	0.30072
TOMM7	0.961042	0.299178
KRT8	0.968038	0.303208
ATP5F1E	0.966168	0.302859
EEF1B2	0.961766	0.302087
GAPDH	0.967435	0.305391
RPL23	0.963816	0.303617
NDUFA4	0.956519	0.300075
BICC1	0.766554	0.145077
BTF3	0.956157	0.299938
CHCHD2	0.960801	0.30294
HSP90AA1	0.958087	0.302927
HINT1	0.955011	0.301825
SRP14	0.957363	0.303209
CITED4	0.837595	0.222689
COX4I1	0.954529	0.302608
RPSA	0.958268	0.305446
DSTN	0.949101	0.30131
NPM1	0.949765	0.301689
JUND	0.946146	0.30041
HSPB1	0.946569	0.301282
RPS26	0.952298	0.304637
DUSP1	0.881679	0.261728
ANXA2	0.954529	0.306732
COX6C	0.942588	0.30301
S100A10	0.951092	0.307956
RPL4	0.94488	0.304942
RPL36A	0.946569	0.306346
HNRNPA2B1	0.942106	0.305071
HSPE1	0.936739	0.302953
HSP90B1	0.940236	0.305028
TMBIM6	0.944156	0.307441
MYL12B	0.941684	0.306401
ITGB1	0.930648	0.300675
SKP1	0.936196	0.304262
ATP1B1	0.939091	0.306092
RPL31	0.93113	0.302021
RPS20	0.919069	0.295814
UBL5	0.935774	0.305572
COX5B	0.936075	0.306217
ATP5MG	0.934568	0.306901
DDX5	0.933844	0.306725
NUCKS1	0.89772	0.285803
MT-ND4L	0.932698	0.306675
BTG1	0.920757	0.300339
MYL12A	0.93312	0.307479
SERPING1	0.732903	0.1323
DYNLL1	0.927753	0.30518
HMGB1	0.934688	0.309498
SUMO2	0.929562	0.306924
COMMD6	0.919069	0.301398
CEBPD	0.893318	0.286499
HLA-B	0.916476	0.301127
TAGLN2	0.926728	0.307481
RPS27L	0.916415	0.301847
OAZ1	0.925703	0.307529
TOMM20	0.914787	0.30174
COX6B1	0.927271	0.308975
GPX4	0.925039	0.308369
ANXA4	0.914425	0.302722
MZT2B	0.922868	0.307557
MGST3	0.912375	0.301717
ITM2B	0.924496	0.308837
ATP5MD	0.918586	0.305648
SPINT2	0.910626	0.302347
ATP5ME	0.917802	0.306936
ATP5MC3	0.91135	0.303562
ELOB	0.92528	0.312281
COX6A1	0.91925	0.309584
KLF6	0.903932	0.300723
OST4	0.915571	0.30758
RAC1	0.920154	0.310279
YWHAZ	0.910686	0.305254
CYBA	0.92118	0.311937
PTMS	0.883428	0.289504
YWHAE	0.895489	0.297122
PPDPF	0.91925	0.311891
CEBPB	0.865999	0.278718
EEF2	0.907008	0.305729
TIMP1	0.908033	0.30985
COX8A	0.908153	0.310138
HLA-C	0.896454	0.303388
CLIC1	0.910144	0.312093
ZFAS1	0.904294	0.308891
PEBP1	0.889157	0.299905
CANX	0.896756	0.304555
TM4SF4	0.725847	0.149399
UQCRH	0.906646	0.311188
PFN1	0.904053	0.310156
PABPC1	0.902605	0.309768
NCL	0.878905	0.295295
HNRNPU	0.897298	0.306922
HSPD1	0.893801	0.304929
BRI3	0.895791	0.30618
HNRNPA1	0.906465	0.312617
GTF2I	0.876854	0.295099
GSTP1	0.898384	0.309173
GUK1	0.902424	0.311715
SSR2	0.890906	0.305094
CFL1	0.906827	0.314818
TM4SF1	0.866723	0.291217
SSR4	0.903148	0.314474
NDUFS5	0.891328	0.307988
SEC61G	0.899228	0.312825
ARF1	0.890604	0.307869
MCL1	0.847123	0.279197
VMP1	0.89175	0.309116
TBCA	0.877638	0.302349
PTGES3	0.887649	0.308967
SRRM2	0.884755	0.307678
NDUFB2	0.8859	0.308966
ATP1A1	0.88192	0.306624
TMCO1	0.867688	0.299956
KRT10	0.87402	0.304859
TPM3	0.873236	0.304381
SON	0.873417	0.304638
ARL4C	0.747437	0.197124
SEM1	0.886624	0.312991
LAPTM4A	0.876372	0.306779
PRRC2C	0.863828	0.298737
UBB	0.892896	0.317507
APP	0.869497	0.303815
UQCR11	0.882403	0.312438
CST3	0.888976	0.31685
RBM39	0.872573	0.306941
ATP5MF	0.880412	0.31192
TPI1	0.890303	0.318295
UFC1	0.857858	0.29812
TPM1	0.864431	0.303363
JUN	0.835484	0.283809
IFITM3	0.883247	0.315607
COX7B	0.879327	0.313383
GNAS	0.888313	0.31919
RPL36AL	0.883488	0.317398
NDUFA1	0.879689	0.315646
NDUFB4	0.872151	0.311432
PERP	0.879448	0.316059
TMEM258	0.878845	0.315725
EIF4A2	0.883006	0.318438
N4BP2L2	0.853033	0.299579
RTN4	0.847485	0.296259
LMNA	0.875709	0.314886
VAMP8	0.864914	0.308219
PMEPA1	0.825835	0.281457
SPTBN1	0.867989	0.311406
ATP6V0E1	0.865758	0.310305
EDF1	0.881739	0.320143
PRDX5	0.874864	0.316352
LGALS1	0.784405	0.249495
ATP5F1C	0.852913	0.303266
LDHA	0.880774	0.321013
ARPC3	0.871186	0.315258
TMEM59	0.87607	0.319483
TXN	0.873176	0.318058
NDUFB7	0.868773	0.316798
PPIB	0.867808	0.316325
ANXA5	0.82867	0.290238
SPCS2	0.859788	0.311821
SOX4	0.845013	0.302191
ATP5PF	0.860632	0.312936
SNRPE	0.845314	0.303088
CIRBP	0.842058	0.30192
TRMT112	0.860632	0.314422
HSPA8	0.866602	0.318214
EIF3E	0.851827	0.309561
XRCC5	0.836751	0.299455
CD81	0.851586	0.310229
SLC25A3	0.862743	0.317657
NDUFB3	0.845314	0.306467
DYNLRB1	0.854903	0.313378
MTDH	0.834821	0.300293
CERS2	0.801954	0.276417
PCBP2	0.859667	0.317812
VDAC1	0.858521	0.31712
CHCHD10	0.857798	0.316909
EIF3K	0.854059	0.314554
MPC2	0.840309	0.306076
RHOB	0.813593	0.28687
SSBP1	0.838258	0.305104
DYNC1I2	0.82674	0.297119
COX20	0.825473	0.296861
HMGN1	0.844229	0.311446
CLTA	0.839404	0.308304
AKAP9	0.826378	0.299294
SUB1	0.852611	0.31773
SQSTM1	0.849596	0.315917
NOP53	0.853998	0.319052
HNRNPA3	0.839344	0.31174
SEC61B	0.836871	0.310699
CD151	0.851948	0.321144
PPP1R14B	0.844048	0.317202
CALM1	0.84833	0.320073
SRP9	0.83663	0.312401
PSMA7	0.842239	0.316331
SEC62	0.845616	0.318758
TMBIM4	0.827222	0.306417
ARPC2	0.84254	0.317022
CYP3A5	0.766313	0.257942
SARAF	0.82674	0.307626
TSTD1	0.83277	0.311821
HNRNPK	0.843686	0.320214
TRIR	0.838258	0.316685
C12orf75	0.817513	0.30289
DBI	0.837474	0.318061
PKM	0.853154	0.328348
NSA2	0.808226	0.298288
RAB2A	0.817694	0.305379
MORF4L1	0.836389	0.318845
ATP5PD	0.832348	0.317409
ARL6IP4	0.836509	0.320582
UQCRQ	0.839585	0.323057
MZT2A	0.839706	0.323322
DST	0.774213	0.274074
FOS	0.821433	0.31148
SEPT2	0.80913	0.302868
KRT19	0.852129	0.332325
NFKBIA	0.797732	0.294995
CCNI	0.825594	0.315534
SCAF11	0.776022	0.277322
NDUFA13	0.843927	0.327793
DSP	0.81106	0.305535
CFLAR	0.781751	0.282703
TSPO	0.845133	0.329217
NAP1L1	0.80316	0.300268
SEC11A	0.823242	0.31495
DDX17	0.82879	0.319047
RNF19A	0.751719	0.256531
CALR	0.836148	0.324811
SEPT7	0.819624	0.313863
EIF3H	0.81896	0.313483
SF3B1	0.819202	0.314355
SRSF3	0.82083	0.315549
FIS1	0.824388	0.318238
ENO1	0.831926	0.323775
CAST	0.813834	0.311339
SPATS2L	0.812628	0.3112
CD46	0.825896	0.32055
SAT1	0.842902	0.331692
RAN	0.828187	0.322229
COX7A2	0.836932	0.328105
FUS	0.804788	0.306032
ZNF706	0.818719	0.316071
UBXN4	0.806477	0.30735
VTN	0.614884	0.0551385
TAF1D	0.816367	0.315137
UQCR10	0.835786	0.328472
JTB	0.817754	0.31667
JUNB	0.806718	0.308789
YBX1	0.83669	0.329532
GCC2	0.797129	0.30178
VPS28	0.815101	0.316234
SUMO1	0.811482	0.314379
TNFRSF12A	0.742371	0.256014
HSPA5	0.817332	0.319868
DAD1	0.823182	0.324324
GNG5	0.827464	0.327435
VDAC2	0.808407	0.314638
ATP5F1B	0.820528	0.323219
SLC25A6	0.825956	0.327573
ROMO1	0.818779	0.323585
YWHAB	0.81697	0.322447
ATP5F1D	0.81697	0.322515
PRDX1	0.830057	0.331682
NFE2L2	0.776806	0.292952
AKR1C3	0.761127	0.27987
TRAM1	0.789832	0.30398
CSTB	0.827464	0.331074
SET	0.800386	0.312794
WDR83OS	0.813533	0.322247
PRDX6	0.810156	0.319935
CAMK2N1	0.767338	0.286611
KDELR1	0.806356	0.317388
SELENOW	0.821493	0.329032
SRSF9	0.814618	0.324701
C12orf57	0.811904	0.322991
ARPC5	0.790375	0.307587
IL6ST	0.70679	0.228491
LAMTOR4	0.809914	0.322641
ELK4	0.689603	0.207334
DNAJA1	0.788807	0.307863
NFIC	0.694186	0.213944
EID1	0.782354	0.303575
COX7A2L	0.789712	0.309809
SNRPB	0.800748	0.318308
NDUFB11	0.81305	0.327078
PNRC1	0.774816	0.29846
MRPL51	0.796948	0.316842
PDIA3	0.811	0.327095
EIF4B	0.797129	0.317816
MIF	0.824147	0.336538
CLDN3	0.725847	0.255382
KRTCAP2	0.802798	0.322062
P4HB	0.819382	0.333709
ENY2	0.787299	0.3109
SBDS	0.773248	0.300529
SF3B6	0.800929	0.321844
YBX3	0.805693	0.325491
SOD1	0.812568	0.330451
HSPA1A	0.808889	0.328006
PGK1	0.812206	0.33035
ERP29	0.806477	0.326535
ID2	0.703232	0.232627
COPS9	0.79321	0.317507
MRPS21	0.792546	0.31705
CBX3	0.800326	0.323288
ANAPC16	0.794355	0.320295
CAV2	0.754915	0.288548
NDUFS6	0.800989	0.325444
RPS17	0.793511	0.320527
IER2	0.782354	0.312798
PCBP1	0.801954	0.327467
NDUFB9	0.783802	0.31454
RPL17	0.785671	0.316403
ZFP36L2	0.796345	0.324622
CTSD	0.795984	0.324825
CYCS	0.788083	0.319056
ZFP36	0.779279	0.313645
PSAP	0.798878	0.328756
SNRPG	0.797853	0.328665
PCBD1	0.784164	0.318751
LRRFIP1	0.772524	0.309992
TMA7	0.807683	0.336126
RBM3	0.786033	0.32104
C19orf53	0.798939	0.330436
TPM4	0.775721	0.313241
ATP6V1G1	0.78151	0.31784
MRPL33	0.788747	0.323943
DDX18	0.763056	0.306685
ATP5MPL	0.788144	0.326861
TACC1	0.66729	0.204758
OCIAD2	0.787239	0.327009
SH3BGRL3	0.794597	0.332455
ST13	0.794416	0.332573
ELF3	0.804426	0.339915
NDUFC2	0.786154	0.327278
RBM8A	0.782957	0.325629
PFDN2	0.776505	0.321065
SNRPD2	0.79333	0.333958
GLS	0.673501	0.217544
IER3	0.758714	0.3079
HNRNPC	0.780726	0.325272
ZC3H15	0.754553	0.304425
HNRNPDL	0.790194	0.332195
BSG	0.785912	0.329526
NENF	0.77168	0.319253
PDIA6	0.790013	0.332926
ATRAID	0.768785	0.317778
FOSB	0.695091	0.248582
UBE2B	0.767398	0.318206
TAX1BP1	0.770414	0.321525
SAP18	0.788023	0.334674
NDUFC1	0.782777	0.330962
ITIH5	0.577494	0.0397112
GADD45B	0.684176	0.23767
TPR	0.733868	0.293116
AFDN	0.706489	0.265839
SERP1	0.780063	0.331973
ZNHIT1	0.780364	0.33237
MBNL1	0.72446	0.285833
TOR1AIP2	0.715173	0.277507
NDUFA11	0.780786	0.334344
C19orf70	0.767278	0.324215
POLR2J	0.758654	0.318046
CXXC5	0.614642	0.136125
HNRNPH1	0.772163	0.328896
ATP5PO	0.770112	0.327399
EIF4G2	0.782656	0.336707
C8orf59	0.767278	0.325255
YWHAQ	0.763539	0.322434
NDUFAB1	0.764805	0.323735
NEDD8	0.776203	0.333143
TGOLN2	0.728802	0.293935
CCT3	0.74991	0.312794
KMT2E	0.73429	0.300792
LAMTOR2	0.753649	0.318035
EIF5	0.741105	0.307896
SRSF5	0.754794	0.31993
ID1	0.705886	0.274738
CNPY2	0.752623	0.318703
DMKN	0.730853	0.300127
KTN1	0.769509	0.332287
RSRC2	0.742612	0.310951
TMEM14C	0.750754	0.318572
C11orf58	0.760946	0.326896
NDUFB8	0.762875	0.328414
APLP2	0.773248	0.336713
GOLGB1	0.743758	0.313498
HNRNPF	0.767821	0.333298
SPCS1	0.768182	0.334344
CUTA	0.757749	0.326526
RPL22L1	0.774213	0.339677
EPS8	0.738391	0.311671
CIB1	0.77765	0.342997
NFIB	0.671149	0.241325
TMED9	0.76173	0.331375
FAM107B	0.730913	0.30608
C1orf43	0.745326	0.318951
RSL24D1	0.757207	0.328843
NR2F2	0.695212	0.272176
PDCD6	0.752865	0.326972
SLC38A1	0.709142	0.28811
BCAP31	0.76179	0.334633
ATP6V1F	0.745266	0.321623
LSM8	0.743638	0.320531
CIR1	0.701061	0.280898
SMIM26	0.753106	0.328891
H1FX	0.754252	0.330174
CHMP2A	0.754674	0.33166
ENAH	0.670426	0.247988
LMAN2	0.759438	0.335637
PPP1R15A	0.704559	0.287361
HSBP1	0.760704	0.337013
PRELID1	0.753166	0.331209
DUSP23	0.725787	0.308572
LAMTOR5	0.756121	0.334148
TUBA1B	0.751417	0.330503
CD59	0.745688	0.326378
POMP	0.758594	0.337354
KIF5B	0.741708	0.323934
ATF3	0.643589	0.215006
TAF7	0.719515	0.304558
PPIG	0.728079	0.312785
ASH1L	0.700398	0.286346
APRT	0.754553	0.336409
WWTR1	0.667833	0.251301
WSB1	0.749789	0.33328
GABARAPL2	0.746834	0.331029
HIGD2A	0.743819	0.328762
PPP1CB	0.735858	0.322525
ERRFI1	0.708539	0.298442
TMED2	0.747075	0.332974
SELENOH	0.755397	0.33952
BEX3	0.727656	0.3168
TCEAL4	0.693101	0.2833
SSR3	0.743276	0.330418
ELOC	0.73236	0.321754
COX17	0.745206	0.332883
CAV1	0.631528	0.205222
CSNK1A1	0.736702	0.326497
NDUFA10	0.715475	0.307939
EIF3G	0.749548	0.33832
SRSF7	0.741165	0.332428
BZW1	0.72844	0.322736
PNN	0.705886	0.302402
NDUFA2	0.741225	0.333857
FAM133B	0.69485	0.293909
ARPC1B	0.736341	0.332386
ARHGAP29	0.611084	0.180045
COX5A	0.743638	0.338856
NDFIP1	0.715173	0.316051
ALKBH7	0.72826	0.328028
FKBP2	0.747497	0.343624
VAPA	0.740562	0.338255
NDUFB10	0.739657	0.3381
CCNL1	0.715113	0.317171
POLR2J3.1	0.648173	0.242565
BUD31	0.731456	0.331846
EIF2S2	0.730431	0.331604
SLC40A1	0.681462	0.285127
ISCU	0.697925	0.302453
CDC42	0.739416	0.33967
EGLN1	0.641298	0.235184
SNRPN	0.649198	0.246939
NORAD	0.716198	0.320712
NDUFV2	0.733325	0.335701
PTTG1IP	0.726511	0.330387
GSTK1	0.724521	0.328977
ARID4B	0.681824	0.287766
LUC7L3	0.717404	0.32363
RHOC	0.735496	0.339471
UBE2D2	0.713545	0.322337
TMEM176B	0.638282	0.237299
TIMP2	0.647389	0.250611
RBPMS	0.641479	0.242595
HDLBP	0.72054	0.330382
PAWR	0.698106	0.310131
SLC25A5	0.732602	0.342356
PROX1	0.556809	0.0824804
MDH2	0.728561	0.339186
NDUFA3	0.735255	0.344622
CSDE1	0.724943	0.33637
RAB13	0.702509	0.316614
CLDN1	0.676637	0.290457
SF1	0.703413	0.317815
EGR1	0.647087	0.254965
RABAC1	0.728983	0.340786
ENSA	0.70679	0.321799
IRF2BP2	0.705283	0.321124
IFITM2	0.699373	0.316215
LSM7	0.724521	0.339709
PDGFA	0.57683	0.139064
ETFB	0.721143	0.33725
KRT7	0.727898	0.343415
PARK7	0.722772	0.339378
DPYSL2	0.618321	0.220186
ERH	0.721867	0.339768
OCIAD1	0.711615	0.33099
LIMCH1	0.548486	0.0715598
LPGAT1	0.652515	0.270152
CYSTM1	0.735798	0.352526
MTPN	0.671873	0.293532
CNBP	0.725787	0.34482
PAIP2	0.690146	0.312879
EIF1AX	0.714932	0.336189
TESC	0.670546	0.293493
AES	0.721505	0.342601
H2AFZ	0.718249	0.33991
RSL1D1	0.704499	0.327964
PHPT1	0.721927	0.343371
BPTF	0.690327	0.31492
MYDGF	0.724159	0.345577
PET100	0.724882	0.346313
DEK	0.697322	0.322255
DSG2	0.719575	0.342662
HSPA9	0.691412	0.317478
LMAN1	0.691774	0.318176
SNX3	0.711856	0.337635
NDUFS2	0.69485	0.322275
APH1A	0.696478	0.324146
GPBP1	0.696357	0.324065
REEP5	0.711374	0.337638
ATP5F1A	0.69491	0.323053
NDUFB1	0.717646	0.343376
BANF1	0.710529	0.337681
SERBP1	0.720661	0.346709
HNRNPA0	0.688397	0.317774
FAM96B	0.708901	0.336887
EIF5B	0.690447	0.32009
ATRX	0.678386	0.308094
RNF7	0.71843	0.345368
CYTOR	0.630624	0.250985
PSMA2	0.709444	0.338395
TMEM219	0.705102	0.335153
LGALS3BP	0.723254	0.35194
MRFAP1	0.692196	0.325379
TMEM205	0.693523	0.327013
DNAJB1	0.68104	0.314953
GHITM	0.69491	0.328966
NDUFS4	0.676577	0.310957
TUBB	0.690086	0.325891
PDZD8	0.634905	0.263828
RBX1	0.717827	0.350981
PSMB6	0.694307	0.330523
AP2M1	0.70269	0.338143
CCT6A	0.699192	0.3365
AHNAK	0.705223	0.341851
CTNNA1	0.706248	0.342891
ANXA11	0.719515	0.354173
WFDC2	0.572066	0.16157
CRIP2	0.581956	0.183725
PSMD4	0.686467	0.327445
RHEB	0.698468	0.338587
PSMB4	0.679291	0.320422
SELENOP	0.626221	0.257649
SNU13	0.719093	0.357474
FKBP1A	0.697141	0.339429
CARHSP1	0.699192	0.341287
H2AFV	0.69485	0.337435
MT2A	0.680497	0.324109
NME3	0.691533	0.334668
BLVRB	0.705524	0.347154
IK	0.664395	0.307542
LGALS3	0.726812	0.364581
PHB	0.702388	0.344975
DNAJB6	0.696116	0.340362
EIF3F	0.704197	0.347508
RBCK1	0.69286	0.337657
TMEM14B	0.679411	0.326196
ATP5IF1	0.702147	0.347402
CCT4	0.682789	0.330059
UBXN1	0.693885	0.340593
SNRPF	0.699916	0.346141
CTSH	0.647268	0.293184
SRSF11	0.695091	0.342873
SLC38A2	0.670486	0.321204
SH3YL1	0.671753	0.322816
NDUFB5	0.68894	0.340111
CXADR	0.671994	0.323929
PLP2	0.698167	0.349314
S100A13	0.698046	0.34928
TROVE2	0.615306	0.256558
PDLIM1	0.696237	0.348145
LAD1	0.673743	0.327272
HDGF	0.688397	0.341468
S100A16	0.690206	0.343223
SCAND1	0.699313	0.351527
ATF4	0.703172	0.355053
CLDN4	0.708117	0.359271
COL18A1	0.559884	0.158219
ANAPC11	0.701664	0.354758
SNRPB2	0.679653	0.335339
EIF2S3	0.667833	0.324591
VEGFA	0.690809	0.347145
POLR2L	0.708178	0.362002
MT1E	0.653118	0.309795
U2SURP	0.670124	0.328458
ANKRD12	0.654625	0.312365
SELENOS	0.687131	0.345059
UBALD2	0.690508	0.348543
EEF1A2	0.520926	0.0600653
DDX3X	0.668918	0.328287
CAPZA2	0.682969	0.341991
BAX	0.661259	0.321179
C3	0.580871	0.209066
MAP1LC3B	0.666144	0.326546
SSB	0.670245	0.331207
POLR2K	0.678386	0.33946
PDAP1	0.676336	0.337606
TM9SF3	0.694669	0.354461
TUBA1A	0.556145	0.160339
ADAR	0.667953	0.329864
NOP10	0.693764	0.354868
LAMP2	0.648957	0.310987
RNF213	0.66132	0.324421
ACP1	0.678748	0.341774
DHRS7	0.668014	0.332309
TMED10	0.692739	0.355351
PA2G4	0.671692	0.336866
GMNN	0.602581	0.252711
SYPL1	0.681341	0.346445
PHF14	0.645278	0.3099
GTF2A2	0.663973	0.330333
NDUFA12	0.680678	0.346817
CKB	0.593957	0.241159
HES4	0.623749	0.285359
PAK2	0.654324	0.321875
GADD45GIP1	0.687794	0.354483
EIF3A	0.672898	0.34105
CHMP5	0.67718	0.345362
SYF2	0.657822	0.3265
ACTR2	0.66729	0.336153
SRRM1	0.670064	0.338906
GNB2	0.68496	0.353373
BCL2L1	0.632553	0.298676
H2AFJ	0.658425	0.328123
ARL6IP1	0.685563	0.354348
SRI	0.695453	0.36326
PSMB3	0.689181	0.358518
VKORC1	0.656917	0.327883
COMT	0.680738	0.351488
IQGAP1	0.661923	0.334021
PSMD8	0.682969	0.354259
METAP2	0.653721	0.326415
CLDN7	0.693161	0.364024
SDC4	0.666204	0.339531
NCKAP1	0.643589	0.316073
DDT	0.689784	0.361541
RARRES2	0.602099	0.263771
PSMB1	0.686769	0.360297
SCP2	0.681582	0.355975
LEPROT	0.638041	0.311691
TCEA1	0.655952	0.331633
ACTN4	0.691955	0.365622
PON2	0.657158	0.333598
ATOX1	0.659872	0.336808
OTUD6B-AS1	0.623688	0.29584
SRSF2	0.680014	0.356209
CDV3	0.655108	0.33237
CSNK2A1	0.644132	0.32059
DAZAP2	0.672295	0.349402
RAB25	0.66536	0.343078
SERPINE2	0.537088	0.14043
CFDP1	0.653178	0.3308
HIST1H1C	0.616632	0.287556
ZNF207	0.665782	0.343795
TNRC6B	0.633337	0.309079
PPA1	0.682125	0.359186
NDUFA5	0.670305	0.348781
DUT	0.649741	0.32843
CYR61	0.555301	0.185493
SYNE2	0.651007	0.330335
CACYBP	0.656555	0.336118
CTNND1	0.664576	0.344243
ECI1	0.658364	0.338123
MDH1	0.656254	0.336585
HMGN3	0.639006	0.31876
SFPQ	0.664335	0.345377
TUBB4B	0.66331	0.344556
MRPS34	0.66741	0.349
ACBD3	0.635147	0.316148
UBE2I	0.662887	0.345636
SNRPD1	0.668617	0.3516
PHLDA3	0.615547	0.293242
MLF2	0.659329	0.343521
HAX1	0.637076	0.3199
HES1	0.618261	0.297471
KRTCAP3	0.657761	0.342397
CKS1B	0.639187	0.32331
SNHG8	0.669823	0.355443
SNRPD3	0.67314	0.358764
TAPBP	0.656254	0.34335
HLA-E	0.671873	0.358311
RHOA	0.681884	0.367334
RTRAF	0.661802	0.34911
HERPUD1	0.6536	0.340995
RRBP1	0.65951	0.347182
MSRB2	0.628875	0.314128
FXR1	0.638886	0.326253
SP100	0.623447	0.308587
PRPF40A	0.64166	0.330565
ARPC1A	0.660596	0.350258
RBMX	0.642142	0.331869
METRN	0.582921	0.253245
ARF5	0.65348	0.344187
C4orf48	0.654264	0.345025
RSBN1L	0.625015	0.312914
TMEM230	0.648655	0.339393
MACF1	0.618381	0.304766
FARP1	0.600048	0.280393
BOD1L1	0.610119	0.294884
KDELR2	0.677783	0.36785
TMEM141	0.672959	0.364051
RAB5IF	0.646122	0.338152
SLPI	0.632011	0.322691
DDX21	0.645459	0.3383
UBE2D3	0.664576	0.357697
SDHC	0.631769	0.323824
CCND1	0.645338	0.338914
CXCL8	0.543843	0.182856
IFI16	0.549572	0.195817
RAP1B	0.652394	0.347094
ILF2	0.638282	0.332829
PCM1	0.605235	0.292841
ATP5MC1	0.647871	0.343538
PLPP2	0.640454	0.336043
MAL2	0.666626	0.362625
RDX	0.568508	0.237236
TOB1	0.657882	0.354879
PTPRF	0.648173	0.345353
PJA2	0.599144	0.28674
CRYAB	0.491738	0.0367395
PRDX2	0.664817	0.362517
TRIM56	0.588168	0.271675
KHDRBS1	0.644012	0.342305
BNIP3	0.538958	0.179414
JMJD1C	0.630865	0.328778
LPP	0.628272	0.326045
UGP2	0.620613	0.317482
NPC2	0.622784	0.32019
TXNDC17	0.650826	0.351247
SMIM22	0.675371	0.374043
CREB5	0.499156	0.069791
FLNA	0.5787	0.259511
CLTB	0.656917	0.35761
MINOS1	0.653299	0.354256
ACTR3	0.644494	0.345721
APCS	0.495477	0.058446
ATP6AP2	0.638705	0.340166
ZCRB1	0.62001	0.318959
PGRMC1	0.651791	0.354554
RPN2	0.654143	0.356986
ASAH1	0.639247	0.341942
MFF	0.604632	0.300886
SLIRP	0.658606	0.361457
MTCH1	0.641479	0.344972
PHB2	0.649319	0.353294
CD24	0.671632	0.374818
TMEM50A	0.650766	0.355646
MORF4L2	0.644012	0.349199
ABCC3	0.627367	0.332456
TMED4	0.634845	0.340868
TMEM238	0.666265	0.37213
KMT2A	0.601375	0.301338
ANP32B	0.639308	0.346505
EPB41L4A-AS1	0.609155	0.311687
ATP6V0B	0.660234	0.367168
LAMTOR1	0.639911	0.347417
AKR1C1	0.552467	0.222458
TOP1	0.636172	0.344049
NUFIP2	0.618984	0.324737
PRKDC	0.593716	0.292032
IAH1	0.609516	0.313803
POLR2I	0.646846	0.356028
RAB11FIP1	0.61802	0.324679
EML4	0.587565	0.28455
TUBA1C	0.632372	0.34191
AURKAIP1	0.652153	0.362081
YIPF3	0.63183	0.341649
PDCD5	0.639187	0.349595
RAD23A	0.640634	0.351228
SLC39A1	0.616813	0.324884
TTC3	0.63195	0.342226
SUMF2	0.632312	0.343004
ZNF292	0.590701	0.291245
SLTM	0.617477	0.326869
YWHAH	0.643288	0.355663
UQCRFS1	0.638463	0.350809
DGUOK	0.633277	0.345528
CLINT1	0.635388	0.348342
TUFM	0.646243	0.359818
CNIH4	0.629538	0.343253
WAC	0.613436	0.325151
TCEAL9	0.614401	0.326769
LSM3	0.636111	0.35169
CCT2	0.624714	0.339644
ORMDL1	0.605657	0.317638
TSC22D1	0.6378	0.354335
SCARB2	0.619467	0.334586
CTSZ	0.610602	0.32473
NSD3	0.604993	0.318108
ABI2	0.561874	0.254043
ARF6	0.635569	0.354307
PGLS	0.636534	0.35538
HNRNPM	0.62984	0.348594
YY1	0.621095	0.339003
CCT8	0.629538	0.348336
ZKSCAN1	0.593716	0.304928
MIDN	0.589917	0.299735
POLR1D	0.645338	0.364775
STAU1	0.619105	0.337164
BRD2	0.6141	0.331342
IGFBP7	0.542878	0.220133
NOL7	0.620311	0.338946
TCF25	0.623568	0.343033
CLK1	0.605235	0.321709
PSME1	0.646846	0.367422
TMEM123	0.649379	0.369998
ID4	0.471354	0.00711382
RAB3IP	0.567483	0.268729
MRPS36	0.620311	0.341148
GLUL	0.559341	0.255857
RAB11A	0.641358	0.364164
RFC1	0.568206	0.272151
ANP32A	0.620552	0.343373
EIF3L	0.639308	0.363189
RAD21	0.608793	0.329948
MFSD10	0.620854	0.344393
SEC11C	0.599385	0.31878
CAPN2	0.628392	0.352916
RTF1	0.613255	0.336184
SNHG7	0.609094	0.331436
XRN2	0.597274	0.316871
PPP1R35	0.613738	0.337219
MDM4	0.587866	0.304261
TMEM147	0.62411	0.350712
TES	0.603787	0.327241
GDI2	0.613014	0.338647
GATAD1	0.58473	0.302295
RND3	0.583946	0.30122
LRPAP1	0.61609	0.342811
MLEC	0.623688	0.351477
AKAP13	0.615728	0.34269
RETREG2	0.561754	0.267976
KANSL1L	0.514112	0.168049
ARHGDIA	0.639247	0.368484
NHP2	0.619708	0.348713
CHURC1	0.628151	0.358067
OLA1	0.597154	0.322523
HNRNPAB	0.608612	0.337143
RNF187	0.595887	0.32136
PKHD1	0.478832	0.059576
H2AFY	0.621276	0.351709
PAPOLA	0.626462	0.357854
EIF3J	0.607104	0.336388
METTL26	0.621336	0.352664
HMGN2	0.622482	0.353987
CALD1	0.500543	0.135417
UXT	0.632915	0.365017
MGST1	0.631408	0.363797
SNF8	0.617778	0.34967
MED10	0.597817	0.326242
TJP1	0.585394	0.309798
DDX46	0.598239	0.327001
PYCARD	0.604149	0.335809
ONECUT1	0.483597	0.0853199
MAP3K20	0.53938	0.235098
ANKRD11	0.593595	0.322854
TMEM208	0.624412	0.359084
AP2B1	0.606199	0.338945
CBX5	0.556567	0.268121
TRA2A	0.582318	0.308706
EPC1	0.560789	0.275892
PRPF4B	0.589856	0.319772
RAB34	0.563201	0.280841
SHTN1	0.533892	0.226745
PRDX3	0.607285	0.342088
COPE	0.629478	0.366319
WASL	0.592389	0.323857
AP1S1	0.60035	0.334025
CHD9	0.595224	0.327611
TNNT1	0.521831	0.201679
NSRP1	0.584429	0.314736
LBR	0.57472	0.301268
DPY30	0.618321	0.357058
ZMAT2	0.583283	0.314286
BLOC1S1	0.632071	0.371793
SMAD5	0.575926	0.304747
EIF3D	0.632312	0.372344
MRPL20	0.619527	0.359459
CHMP3	0.605476	0.344519
KPNB1	0.601918	0.340797
NDUFA6	0.630865	0.372428
PCNP	0.606199	0.346296
TLK1	0.561392	0.284803
PTP4A1	0.601013	0.340306
TRIP12	0.563382	0.288662
JAK1	0.600109	0.3399
EIF1B	0.610361	0.352463
RAB10	0.607345	0.349713
GSN	0.620673	0.364652
LITAF	0.577554	0.312738
STUB1	0.61615	0.360438
SF3B2	0.606441	0.350597
UBE2H	0.594138	0.335984
CYB5A	0.615728	0.361036
PAIP1	0.589856	0.330985
PSMA4	0.613677	0.359597
CTSB	0.625678	0.372543
NT5C	0.630985	0.378091
FAM49B	0.56887	0.303683
CLDN10	0.490291	0.135198
HIST1H2AC	0.551803	0.277365
CMPK1	0.631588	0.380589
TAF10	0.617477	0.366516
STMP1	0.612773	0.361947
BDP1	0.551321	0.278282
EMC7	0.591485	0.337208
COX14	0.615185	0.365491
CCT5	0.606441	0.356416
MPLKIP	0.584489	0.329923
GSTO1	0.606561	0.356864
FAM177A1	0.602219	0.352021
HADHA	0.59842	0.347643
UBE2E3	0.58461	0.330617
RALBP1	0.60246	0.352895
SHC1	0.538777	0.258958
FKBP8	0.618321	0.370595
STRAP	0.592691	0.342081
CLTC	0.614281	0.366818
IDS	0.5512	0.282237
CCPG1	0.575262	0.319712
RNMT	0.593234	0.343324
YME1L1	0.580087	0.326495
SLC3A2	0.591605	0.34139
OS9	0.599144	0.350951
NDUFS8	0.612471	0.365963
VPS29	0.610602	0.364008
BTG2	0.553492	0.287533
CRIM1	0.538656	0.26194
HADHB	0.583766	0.332782
RBM25	0.602521	0.35571
CUX1	0.558256	0.296367
VAMP5	0.520142	0.224858
UQCRC2	0.600772	0.354249
CCDC50	0.558256	0.296794
PRR13	0.618442	0.373817
GGNBP2	0.583886	0.334204
PSMC5	0.60825	0.364941
RAPGEF5	0.501025	0.182364
BRK1	0.617416	0.375313
MRPS33	0.588409	0.343096
PPP1R10	0.542938	0.275995
DDX24	0.58865	0.344943
COPZ1	0.60433	0.363423
SERPINA1	0.542214	0.27632
FGD4	0.553009	0.295537
PSENEN	0.58455	0.341105
ALCAM	0.497407	0.180119
FDPS	0.591183	0.350408
ARGLU1	0.605717	0.367267
C4orf3	0.616813	0.37952
MRPL13	0.582017	0.339922
CDH6	0.453624	0.0279142
ECHS1	0.604089	0.367014
MEAF6	0.575926	0.333101
VAMP2	0.547039	0.290441
PSMB2	0.605536	0.369601
RIF1	0.573031	0.330137
CAP1	0.600229	0.364147
NAA38	0.595163	0.358489
MRPS26	0.585575	0.347007
SUGT1	0.575383	0.334194
DYNLT1	0.606079	0.371207
ITGB8	0.553914	0.303375
C9orf16	0.596309	0.360579
SOX9	0.578459	0.338756
THRAP3	0.579243	0.339953
MT-ATP8	0.585032	0.347613
SDCCAG8	0.562598	0.317457
TMEM54	0.600772	0.366406
SNORC	0.519901	0.242177
EIF4A1	0.576468	0.337836
CD9	0.605898	0.372846
MRPL52	0.613919	0.381493
EPRS	0.571101	0.331215
SPTSSA	0.54921	0.299192
C7orf50	0.571041	0.332134
HNRNPH3	0.592329	0.35963
PMVK	0.565372	0.32486
SELENOM	0.576529	0.340235
ELF1	0.572428	0.334922
SEPHS2	0.582258	0.347723
NDUFAF8	0.589374	0.357209
PSMB8	0.556386	0.312877
CHMP4B	0.575081	0.339521
GTF3C6	0.561512	0.320762
NUDC	0.591244	0.359969
NAMPT	0.566156	0.327748
NR3C1	0.514956	0.238473
PDZK1IP1	0.580328	0.347372
NONO	0.589736	0.35888
ARMCX3	0.533349	0.275972
CETN2	0.549331	0.304285
RPA3	0.585756	0.355517
ODC1	0.560367	0.322296
PPFIBP1	0.536907	0.284555
BROX	0.56296	0.326187
RNF181	0.593776	0.365756
CYC1	0.588047	0.359246
TRAPPC4	0.55711	0.318178
MRPL41	0.593957	0.366461
XBP1	0.604511	0.378164
COPA	0.566156	0.33229
RAB7A	0.59251	0.365802
NDUFS1	0.541611	0.295055
HNRNPD	0.590882	0.364179
TXNL1	0.538114	0.289627
NARS	0.561874	0.327244
MAP3K1	0.509167	0.232455
ERBB3	0.59444	0.369112
PNISR	0.582017	0.354578
COPS6	0.580871	0.354337
COPS5	0.550959	0.313031
SKIL	0.549873	0.311745
SHC2	0.4763	0.147084
LAMP1	0.594621	0.371454
TMEM106B	0.565131	0.334966
RAB14	0.557653	0.324346
LARS	0.556507	0.323014
TMEM176A	0.5237	0.267173
GABARAPL1	0.50006	0.215516
DYNC1H1	0.576951	0.351302
PHLDA2	0.591907	0.369378
RAB1A	0.592751	0.370823
ZFP36L1	0.601978	0.381076
LSM4	0.594199	0.37282
EIF6	0.595224	0.374247
ESF1	0.565432	0.337572
ESD	0.573393	0.348231
DDR1	0.572971	0.347728
RTN3	0.595827	0.375316
FAM204A	0.548728	0.313956
PPP1R7	0.555241	0.324257
C19orf33	0.617718	0.398391
MRPL43	0.586057	0.365169
CDKN1A	0.500965	0.2227
HM13	0.579846	0.358915
RANBP1	0.59655	0.378487
HSPA1B	0.598782	0.380946
SEPT9	0.581775	0.36214
PRKAR1A	0.583283	0.364103
TMEM167A	0.577494	0.3571
CDH1	0.591183	0.37349
NIFK	0.554638	0.326917
BRD4	0.558135	0.333261
DDRGK1	0.578579	0.360272
PAFAH1B1	0.536124	0.298896
CWC15	0.567664	0.346456
PLEKHA1	0.546014	0.315491
BAZ2B	0.521107	0.273377
BBX	0.55319	0.327788
CEP350	0.536244	0.301822
PRDX4	0.590037	0.37614
FUNDC2	0.545411	0.317279
C1QBP	0.569594	0.352106
PPIC	0.572066	0.355439
NAA20	0.574539	0.358969
BACE2	0.550235	0.325846
ERGIC2	0.548969	0.324001
TBCB	0.558377	0.337744
LY6E	0.591907	0.379622
DRAP1	0.591605	0.379507
GOLGA4	0.582499	0.369928
GRN	0.603244	0.392948
NDUFS7	0.571463	0.35708
DNAJC19	0.568508	0.353429
PGAM1	0.586057	0.374767
MEIS2	0.459896	0.116952
AIMP1	0.579363	0.367544
ANXA7	0.571704	0.358202
CCDC59	0.552225	0.331898
RTF2	0.558015	0.340532
BCL7C	0.571463	0.358907
LYPLAL1	0.517248	0.274304
MARCKSL1	0.601918	0.394173
SUCO	0.515137	0.271471
STK17A	0.501869	0.243179
LSR	0.603968	0.397594
DNAJC10	0.553612	0.338044
SIVA1	0.579062	0.371144
SELENOK	0.575745	0.367455
CAPNS1	0.586359	0.380108
CXCL2	0.481607	0.195122
UHMK1	0.54915	0.332503
PPM1G	0.567181	0.357889
DECR1	0.537933	0.315951
FLOT1	0.559402	0.348046
PSMA1	0.584248	0.379014
ARF4	0.588892	0.384417
ZRANB2	0.558618	0.34841
RSRP1	0.554034	0.342188
ZNF638	0.540104	0.321875
ZFAND5	0.545652	0.330472
YWHAG	0.556748	0.346916
ERGIC3	0.575443	0.37112
HNMT	0.567724	0.362152
CAMLG	0.538837	0.321667
EMC6	0.549934	0.338484
METTL5	0.558196	0.350137
OSTC	0.584972	0.383226
CDK2AP2	0.569111	0.364597
PTP4A2	0.592389	0.391463
CPNE3	0.541129	0.326048
SERINC3	0.564166	0.358719
DDIT3	0.536425	0.318808
TMEM9	0.532445	0.31233
PPP4C	0.583886	0.382762
STAT1	0.538355	0.322377
NBEAL1	0.537993	0.322421
CDC37	0.579122	0.378245
TRAPPC1	0.553673	0.346269
PABPC4	0.551502	0.343456
IGBP1	0.549451	0.341215
DYNC1LI2	0.548004	0.339271
SOD2	0.546134	0.336557
PBX1	0.471475	0.179126
TERF2IP	0.533711	0.317709
FAM213A	0.553251	0.347279
CCDC47	0.571945	0.372793
ROCK1	0.538717	0.327385
C6orf48	0.533229	0.318746
ARPP19	0.557653	0.355744
CREBRF	0.506513	0.27073
IARS2	0.551381	0.347255
RNPS1	0.566639	0.367699
ADAM10	0.559402	0.358817
C1D	0.556326	0.35476
TIMM13	0.567784	0.369517
BAZ1B	0.520022	0.297973
HP1BP3	0.549572	0.345519
HIST1H4C	0.535038	0.323677
PRPF6	0.536063	0.325467
PPP1R12A	0.534435	0.323201
PIK3AP1	0.459595	0.147444
VPS35	0.559583	0.359848
YTHDC1	0.532083	0.31979
SPAG7	0.522434	0.303953
SNX6	0.559281	0.360237
MIR4435-2HG	0.508322	0.278463
EIF4H	0.563201	0.366203
ITGAV	0.526716	0.312716
IFT22	0.515197	0.292564
SDHD	0.545109	0.343382
EBPL	0.554034	0.355976
EMC4	0.549089	0.349689
KMT2C	0.512061	0.288861
SLC9A3R1	0.522735	0.308496
CCT7	0.557713	0.361987
SMIM7	0.558015	0.36296
SPINT1	0.581715	0.391304
DCTN3	0.531601	0.324831
MGAT4B	0.566035	0.373264
AFF4	0.527319	0.317888
COA4	0.560005	0.365884
HSD17B11	0.574659	0.383755
PUF60	0.561754	0.36826
CASC4	0.541973	0.341467
MYO1C	0.524726	0.31445
MALSU1	0.536968	0.33438
STOM	0.507056	0.281981
SNRNP70	0.566699	0.375116
UGT2A3	0.467495	0.184944
PLPP5	0.529731	0.323788
MESD	0.548486	0.352807
DNPH1	0.560065	0.368661
RPL26L1	0.533772	0.331546
EIF3M	0.565372	0.375375
PTPN12	0.538114	0.3384
EIF5A	0.572729	0.38471
SSR1	0.548547	0.354252
WWP1	0.509167	0.289609
PLEKHA3	0.497407	0.266127
CAPS	0.489688	0.248705
LSM5	0.56899	0.381393
SREK1	0.51978	0.31048
PPP4R3B	0.517187	0.306093
SPTAN1	0.551924	0.360224
ORMDL2	0.551079	0.359097
MDK	0.535098	0.336598
NCOR1	0.534435	0.335732
SMIM15	0.534194	0.335534
AAK1	0.488059	0.247513
HOOK3	0.496442	0.267029
MPHOSPH8	0.532385	0.333535
SFT2D2	0.497708	0.270356
NAXE	0.533711	0.336084
HNRNPR	0.548667	0.358483
CHD4	0.517971	0.310785
UFM1	0.564528	0.379162
ECH1	0.567	0.382747
CSNK2B	0.560789	0.375277
TM9SF2	0.568086	0.384153
PSMB5	0.56302	0.378263
MRPL57	0.577554	0.395544
ABLIM1	0.530756	0.334518
GPAA1	0.530213	0.333838
PPP2CB	0.515921	0.310192
KLF3	0.540043	0.349153
TYMP	0.564226	0.381299
RNF130	0.479436	0.233956
ZBTB38	0.512966	0.306425
UBE2M	0.558678	0.375615
MUC20-OT1	0.524183	0.326776
SLC2A4RG	0.520987	0.321527
RAB4A	0.538656	0.349548
TUBA4A	0.504885	0.292666
EIF2A	0.539923	0.351936
FNDC3B	0.516403	0.31485
CHCHD5	0.548607	0.365134
SMDT1	0.565312	0.386197
TGIF1	0.544385	0.359969
NUB1	0.517489	0.31913
IRS2	0.528887	0.337963
MYH9	0.567543	0.390045
AGFG1	0.50983	0.305797
MYO1B	0.470993	0.218375
CUL3	0.518152	0.321327
PHF3	0.524243	0.331924
MAP2K2	0.54324	0.360591
HSPH1	0.540827	0.357823
WASF2	0.528646	0.340257
MTX2	0.516102	0.320308
XRCC6	0.569413	0.394976
DNAJB2	0.49216	0.274126
SH3BGRL	0.531721	0.34592
COA3	0.554276	0.377135
MAT2A	0.52563	0.336631
RAB5C	0.555602	0.37922
CALU	0.53944	0.357907
SEZ6L2	0.545592	0.36659
CEP170	0.47051	0.222599
CDK13	0.506332	0.305082
PLA2G16	0.574539	0.402584
BAG1	0.560427	0.386641
GSDMD	0.518816	0.327786
TOMM22	0.553431	0.378378
GTF2H5	0.537812	0.357585
TAX1BP3	0.504161	0.30217
ARL8A	0.50778	0.309213
SPON2	0.43499	0.105753
C9orf3	0.524846	0.33933
HEBP2	0.565251	0.393922
KCTD3	0.486793	0.267314
ZNF281	0.476842	0.244
OPTN	0.510192	0.315534
PSMG2	0.544506	0.36891
RPS19BP1	0.567121	0.397141
PHIP	0.528284	0.346122
ADAM9	0.536124	0.357891
WBP11	0.516343	0.327204
TNS1	0.423833	0.0599251
RSF1	0.526052	0.343296
LAMC1	0.493788	0.285016
OGA	0.529128	0.348094
FTX	0.47636	0.245198
M6PR	0.526474	0.344841
SMYD2	0.468339	0.225182
C8orf33	0.495115	0.289854
SDCBP	0.548908	0.377386
TIPRL	0.510614	0.320356
MRPL22	0.530153	0.35246
C6orf62	0.513388	0.325863
PDIA4	0.558316	0.390761
CTSC	0.518032	0.334727
MRPL21	0.530153	0.35422
AUP1	0.552225	0.384238
FKBP4	0.539983	0.36828
SMARCA5	0.528042	0.351407
DCTN2	0.527198	0.350182
ARL1	0.547521	0.378704
EMC2	0.502352	0.309115
FAM162A	0.554999	0.388952
HCFC1R1	0.518997	0.338458
WBP2	0.525208	0.349881
SELENOF	0.560125	0.39657
UNC50	0.512725	0.329865
RB1CC1	0.505367	0.317089
SERINC2	0.567965	0.405767
BTF3L4	0.533349	0.362549
ATXN7L3B	0.519901	0.34241
MAP4	0.511639	0.328904
TRA2B	0.538415	0.371135
SREK1IP1	0.505247	0.319083
NIPBL	0.515016	0.337317
UBE2K	0.525811	0.354387
SERPINB1	0.555422	0.394517
MRPS16	0.533108	0.366581
MAGOH	0.5433	0.38091
MMADHC	0.523158	0.35266
ARHGEF12	0.510735	0.332729
RBM17	0.520263	0.348562
MMP24OS	0.526233	0.357768
FGFR4	0.47045	0.249832
RRAS	0.539621	0.377227
ADIPOR1	0.516825	0.344149
ZFAND6	0.522374	0.353534
MRPL24	0.503196	0.321681
TMEM87A	0.521288	0.352315
SUCLG1	0.522374	0.354449
SP3	0.494995	0.307517
AQP1	0.476058	0.267174
CD2AP	0.540948	0.381507
CCDC107	0.513569	0.341377
GSPT1	0.524545	0.358886
MAF1	0.522856	0.356443
PCMTD1	0.504644	0.326573
SERTAD1	0.503015	0.324068
VDAC3	0.518333	0.350635
SH3GLB1	0.534194	0.373993
LARP1	0.522615	0.357455
TLN1	0.478109	0.274591
HYI	0.491798	0.305839
CEBPZ	0.50205	0.325365
HIF1A	0.491014	0.304756
PARP1	0.498854	0.319961
CCDC6	0.514896	0.348045
RNF115	0.476782	0.274745
PRMT2	0.510373	0.342424
TRIP6	0.51972	0.357393
MAGED2	0.493427	0.312321
CDC73	0.483416	0.29206
MOB4	0.507176	0.337952
NDUFV1	0.534013	0.378727
MCFD2	0.486552	0.299531
S100A14	0.499759	0.325986
SSNA1	0.530213	0.374724
MGLL	0.532264	0.37775
RAB21	0.507659	0.340747
JUP	0.542576	0.391684
TRAPPC2L	0.526957	0.37096
HEBP1	0.498432	0.325196
PIN4	0.516584	0.35594
NUTF2	0.526414	0.370747
PRMT1	0.539079	0.387991
KDM5A	0.498311	0.325635
SMIM37	0.525449	0.369947
KDSR	0.484139	0.29819
PTPRA	0.493427	0.316914
SVIL	0.474309	0.276782
NDUFV3	0.50597	0.340357
COMTD1	0.515318	0.356018
ATP6V1E1	0.524907	0.370644
TATDN1	0.50398	0.337692
DCAF6	0.481003	0.293346
YPEL5	0.508141	0.344841
PARD6B	0.482571	0.296898
COQ10B	0.479315	0.29004
AGPAT2	0.549391	0.403327
GON4L	0.468158	0.265007
LAMA5	0.488542	0.310436
SRP19	0.513086	0.354182
EIF4E2	0.518755	0.364228
PSMA5	0.536546	0.389278
PFKP	0.497527	0.329486
HPN	0.410988	0.0646445
NPEPPS	0.517067	0.36248
SF3B4	0.508262	0.349239
APEX1	0.528525	0.379803
UPF2	0.506694	0.346859
PDZK1	0.42522	0.133038
MAP4K4	0.485828	0.309742
QSOX1	0.518333	0.366618
MSI2	0.509649	0.353157
SMC3	0.50193	0.340596
UBE2L3	0.538174	0.394203
XPO1	0.515077	0.362279
TFG	0.537631	0.393785
YIPF4	0.515861	0.363542
MRPL55	0.506272	0.348366
GPATCH2	0.467676	0.271078
PRPF38B	0.510735	0.355823
RPRD2	0.454589	0.237199
PSMD7	0.525932	0.378669
KCMF1	0.508081	0.352322
VEZT	0.512302	0.359738
GRHPR	0.500181	0.33986
PSMA3	0.526052	0.380425
ANXA13	0.437281	0.18583
RAB18	0.504583	0.347857
CHST9	0.405078	0.0458807
LGALS4	0.549089	0.410336
DDX6	0.493125	0.329149
STOML2	0.517187	0.36918
NOP58	0.500905	0.343243
MARCKS	0.541069	0.402305
ADSS	0.495115	0.334306
FOXP1	0.522796	0.379056
PIN1	0.508865	0.358815
TMEM248	0.516162	0.370106
PURA	0.496502	0.338236
CTSL	0.460198	0.261635
SAT2	0.495356	0.337153
VPS41	0.469183	0.284137
C11orf54	0.49017	0.328264
G3BP1	0.50989	0.362079
KLF10	0.463997	0.273603
NME1	0.518936	0.376946
ADNP	0.491497	0.332186
CALM3	0.531601	0.394408
NTPCR	0.497829	0.3438
FAM200B	0.469364	0.286814
USP34	0.498673	0.345444
PSMD1	0.495718	0.340501
COPS2	0.495839	0.340869
MRPS5	0.498734	0.346348
VPS13C	0.493366	0.33698
SUPT4H1	0.51773	0.37686
SEC31A	0.511941	0.368284
DNAJC21	0.497045	0.344155
METTL9	0.507418	0.361512
DHX36	0.49415	0.339407
RBM33	0.483416	0.319525
CHMP1B	0.495115	0.341514
EIF2AK2	0.496985	0.345277
TMEM179B	0.531178	0.396588
FNTA	0.486491	0.326347
FNBP1L	0.498553	0.348337
TNFAIP2	0.464902	0.280273
SF3B5	0.533832	0.400312
MORN2	0.479797	0.313605
CHTOP	0.501146	0.353207
GIGYF2	0.465083	0.281334
ATP5PB	0.518755	0.380483
REX1BD	0.534917	0.40213
CYB5R3	0.51387	0.373456
PNKD	0.527922	0.393179
LRPPRC	0.496261	0.345294
STAT3	0.50784	0.365459
MKKS	0.450127	0.244764
TUSC3	0.434628	0.197081
COPB1	0.509347	0.368618
MYADM	0.473948	0.304329
TP53TG1	0.479013	0.315259
PIM3	0.531178	0.399959
PPCS	0.516584	0.381114
NME4	0.495356	0.347888
CD164	0.539802	0.411815
SERPINB6	0.526294	0.395218
ZNF655	0.487577	0.334623
GNAI3	0.501025	0.358505
TXNIP	0.531842	0.402992
RALY	0.521047	0.38914
PDCD10	0.520685	0.388657
RBBP6	0.481727	0.324768
TRIM47	0.474068	0.309287
LIMS1	0.501447	0.360286
C1orf35	0.486009	0.333361
TECR	0.535159	0.408084
GNAI2	0.517248	0.384544
MPST	0.532626	0.405132
HACD3	0.506272	0.368465
ERGIC1	0.499337	0.357592
SMIM19	0.486974	0.335938
FXYD5	0.533349	0.406523
SDF2	0.506875	0.369987
GPI	0.515197	0.382687
C1orf122	0.506392	0.370115
MT-ND6	0.483838	0.331862
BUD23	0.520685	0.391372
MOB1A	0.509287	0.375046
SPAG9	0.49204	0.347228
CDC42EP1	0.529068	0.402791
UTRN	0.445182	0.241549
CRP	0.401399	0.0685698
ADI1	0.515499	0.384638
FAM173A	0.504342	0.368067
C19orf24	0.506754	0.372067
MVP	0.519238	0.390529
SNW1	0.492703	0.350091
CD99	0.527379	0.402215
ZC3H13	0.471113	0.308917
EIF4A3	0.510011	0.378527
BRD7	0.49409	0.353915
NKTR	0.502292	0.368249
KANSL1	0.494753	0.356196
PFDN1	0.493849	0.355755
SEL1L3	0.469183	0.308321
TMX4	0.450247	0.262617
COL4A3BP	0.456157	0.278107
RCN2	0.505005	0.374468
TSPAN15	0.515077	0.389318
ARL6IP5	0.52551	0.403437
CNOT2	0.491859	0.353622
ERLEC1	0.497045	0.362568
PSMB7	0.507176	0.378694
TMOD3	0.499095	0.366455
EEF1E1	0.481667	0.336021
SSU72	0.521228	0.398915
ANP32E	0.468882	0.310177
SLC16A7	0.42124	0.172687
GNB1	0.508503	0.381909
CRYZ	0.462309	0.296633
TSPAN31	0.465927	0.305091
TANK	0.470631	0.315859
TXNL4A	0.514112	0.390854
VEGFB	0.508564	0.383057
SINHCAF	0.486552	0.348356
EFNA1	0.487878	0.350827
ADRM1	0.521409	0.402157
JOSD2	0.491497	0.357408
RER1	0.520504	0.401498
NDUFB6	0.49017	0.355841
SEMA6A	0.424496	0.191663
RAMMET	0.483536	0.344667
MRPS18B	0.492763	0.360992
EGFR	0.462731	0.302708
CTDSPL	0.474671	0.328241
NCK2	0.468761	0.316058
CDC42SE1	0.478229	0.335568
RALGPS2	0.469847	0.320216
DAP3	0.489386	0.35738
CNOT4	0.45073	0.276406
TCEAL8	0.486733	0.353907
RASSF7	0.525268	0.411367
SERPINA5	0.394162	0.0622669
SERINC1	0.497467	0.372366
PLS1	0.497708	0.372825
ACADVL	0.522494	0.40848
KLK11	0.431613	0.223837
CALCOCO2	0.491075	0.362833
SDHA	0.494331	0.368782
ATF6	0.460439	0.303376
LSM14A	0.47642	0.337026
SYAP1	0.494693	0.369485
IER5	0.467133	0.318734
BOLA3	0.491557	0.364841
ANO6	0.457002	0.296313
MGMT	0.493246	0.368027
MAN2A1	0.456399	0.295213
SLC34A2	0.411711	0.153503
ZBTB7A	0.478832	0.342987
TSHZ2	0.40345	0.117181
CYHR1	0.475214	0.336644
CTTN	0.517308	0.404388
QKI	0.445845	0.269683
MRPL14	0.514232	0.400352
MRPL18	0.500181	0.380536
KIF12	0.428175	0.217631
F5	0.420034	0.189551
GLRX5	0.503377	0.385844
POGZ	0.458449	0.302505
WAPL	0.467193	0.321866
IVNS1ABP	0.483114	0.353535
ACSL3	0.473224	0.335394
CENPX	0.510855	0.397768
PIGP	0.480581	0.349735
ASPH	0.479677	0.34862
GLIS3	0.412737	0.164653
RNH1	0.517851	0.407916
GDF15	0.468822	0.327625
DNAJA2	0.48613	0.360644
FAM171A1	0.398203	0.0994272
TSR3	0.489265	0.366617
SNRNP200	0.481245	0.352693
C12orf10	0.483235	0.356902
MIA3	0.468279	0.328403
DPCD	0.464781	0.321447
MRPS12	0.499457	0.383963
MRPS7	0.503558	0.390244
COMMD7	0.471294	0.335572
MAZ	0.499518	0.385489
CISD3	0.502171	0.390097
TAOK1	0.479194	0.353563
DPP7	0.474309	0.344747
ZNF148	0.465987	0.328671
KRR1	0.488723	0.371539
NBDY	0.494211	0.380481
PRKCSH	0.498794	0.387696
NAP1L4	0.473284	0.345564
GOSR1	0.468641	0.336889
RNPEPL1	0.48233	0.363064
SARS	0.493004	0.380963
C5orf24	0.46062	0.321067
ATP2A2	0.500603	0.392625
DHX9	0.478169	0.356099
MRPL9	0.462128	0.324667
PSMD11	0.494572	0.384171
SMIM14	0.476903	0.354502
RNF5	0.46846	0.339737
EIF2AK1	0.482571	0.366329
RPN1	0.509649	0.407737
MARCH7	0.455916	0.313788
DAP	0.489929	0.378757
PFDN4	0.491075	0.380666
TMEM256	0.488843	0.377515
MRPL36	0.487517	0.37556
AMD1	0.480099	0.363018
UBE2V2	0.473706	0.351898
SKAP2	0.475757	0.356158
SNRPC	0.490954	0.382275
EIF3I	0.503498	0.401162
PPP1R16A	0.480521	0.366059
EBLN3P	0.456881	0.319867
URI1	0.474551	0.355792
LEPROTL1	0.473767	0.355379
POLR2F	0.495718	0.392057
THUMPD1	0.459474	0.3273
ERBIN	0.4646	0.338201
MRPS35	0.484682	0.375524
ITPA	0.482813	0.37316
NUCB1	0.491497	0.387632
MRPL32	0.482692	0.373513
COPRS	0.480823	0.370768
SRP72	0.476119	0.362535
SNHG25	0.485044	0.378391
JAG1	0.460439	0.332722
SELENOT	0.496864	0.396985
ATP13A3	0.451272	0.313108
GLG1	0.473405	0.358765
MRPL47	0.480883	0.372077
INSIG2	0.459595	0.332019
TTC1	0.457002	0.32652
DDOST	0.492763	0.391677
CAPZA1	0.495959	0.396891
HINT2	0.471053	0.3559
ARL2BP	0.447413	0.306052
ASXL1	0.439935	0.287528
SNX10	0.411953	0.19993
YPEL3	0.486491	0.383493
BNIP3L	0.478712	0.371248
ITGB4	0.506392	0.413658
KLF7	0.416355	0.217943
UBE3A	0.467012	0.350336
MCTS1	0.483114	0.379281
TRIP11	0.460198	0.336896
VPS4B	0.454529	0.325004
PSME2	0.505608	0.413337
DPM3	0.489989	0.391112
EI24	0.488904	0.389671
MRPL34	0.486672	0.386218
POLR2H	0.496502	0.401193
SCRN1	0.424496	0.247407
FGD6	0.450006	0.316166
ZDHHC4	0.458328	0.335258
ILK	0.478048	0.372814
TNRC6A	0.44096	0.295501
ARL2	0.49023	0.393358
MRPL15	0.466952	0.354158
BMPR2	0.435412	0.282663
MRPL40	0.487034	0.389338
ASAP1	0.412556	0.210684
CLNS1A	0.487577	0.390271
ISYNA1	0.424919	0.252572
NUTM2B-AS1	0.442649	0.302016
YIF1A	0.497105	0.405009
ANKLE2	0.45477	0.330403
RBPJ	0.464359	0.351196
THUMPD3-AS1	0.45857	0.339701
MIEN1	0.49801	0.407306
AIDA	0.456157	0.334741
DDX1	0.460017	0.342867
TMEM134	0.487637	0.392076
MTX1	0.469304	0.360979
EPS8L2	0.488904	0.394141
KPNA4	0.472199	0.366607
KNOP1	0.448257	0.318636
IFRD1	0.451574	0.326316
CHCHD1	0.489567	0.397059
MRPL54	0.484501	0.389467
PHF20L1	0.443674	0.309526
ARF3	0.463575	0.352946
CTSA	0.479556	0.381745
GADD45A	0.474008	0.372405
MT1X	0.46466	0.355284
BCLAF1	0.476903	0.377568
IDH1	0.463816	0.354782
HNF1B	0.415089	0.229572
PPP1CC	0.486552	0.394703
CREG1	0.46659	0.361792
EAPP	0.461705	0.352449
PTBP3	0.487094	0.396969
SLC12A2	0.482692	0.39045
PPP1CA	0.497166	0.412151
CHMP4C	0.45073	0.330946
ILF3	0.480762	0.387946
RALA	0.469425	0.368694
ARIH1	0.44295	0.313551
RHOU	0.427994	0.27441
LTBP3	0.469726	0.369822
MPZL1	0.469847	0.370373
CFAP97	0.460077	0.352212
TSTA3	0.479255	0.3869
WNK1	0.455313	0.342792
BIRC2	0.469606	0.370849
PLEKHJ1	0.468942	0.369752
GAMT	0.402485	0.190049
MDM2	0.447594	0.326864
LRP10	0.497648	0.415415
TM7SF3	0.45676	0.3469
FAIM	0.430346	0.284325
CSPP1	0.416054	0.241618
PSMF1	0.467073	0.3676
CNOT7	0.450127	0.333928
SYNGR2	0.503317	0.424295
PDXK	0.499638	0.419615
SRSF6	0.466832	0.368082
GIPC1	0.477988	0.387528
HOOK1	0.438608	0.30819
FCGRT	0.495356	0.414499
VEZF1	0.45079	0.337146
ADD1	0.450308	0.336208
CKLF	0.489627	0.406549
PTPN2	0.453323	0.343149
SQOR	0.471415	0.377776
UBE2R2	0.453202	0.343381
NOL3	0.443975	0.323159
TIMM10	0.468098	0.372565
AGRN	0.465203	0.367549
COA6	0.467073	0.371143
RWDD1	0.461464	0.361802
NDUFAF3	0.480521	0.395172
IMP3	0.47437	0.385277
KIF13B	0.435834	0.30623
TBL1XR1	0.475757	0.388023
MET	0.460017	0.359852
AAMP	0.477506	0.391251
CAVIN1	0.38578	0.127166
ERICH1	0.430768	0.294379
ALDH3A2	0.425039	0.278903
USP8	0.449704	0.340614
NFAT5	0.438367	0.314698
EBAG9	0.445302	0.331583
PKN1	0.436437	0.311352
THOC2	0.468339	0.378223
NDUFA7	0.473586	0.387298
SDC1	0.489929	0.413303
DARS	0.471475	0.384506
PTBP1	0.477023	0.393777
MBD2	0.418466	0.262828
CFAP36	0.449282	0.342338
USH1C	0.45073	0.345706
PFKFB3	0.421964	0.27402
TMED3	0.483717	0.405367
XIAP	0.447172	0.339539
TIMM17A	0.453805	0.353522
RTL8A	0.457846	0.361749
HNRNPUL1	0.457182	0.360523
EPN1	0.480883	0.401935
AZIN1	0.457122	0.360607
FAT1	0.470088	0.384427
TRAPPC6A	0.462851	0.371777
FBXW11	0.434507	0.310988
MAP3K2	0.453926	0.355179
BAD	0.468038	0.381791
CCNDBP1	0.453745	0.355159
GORASP2	0.453383	0.354512
RAB11B	0.470209	0.385821
TCP1	0.475335	0.394484
ACTN1	0.453504	0.355115
RSRC1	0.440839	0.328372
CDK4	0.452961	0.354725
TUT4	0.433723	0.311902
JPT2	0.444096	0.336875
F11R	0.471837	0.390749
KLF2	0.443071	0.335173
SLU7	0.432095	0.309464
PSMA3-AS1	0.439694	0.32839
PTPN11	0.441563	0.334
VPS26A	0.453443	0.359485
CPEB4	0.403148	0.222674
FAM50A	0.46068	0.373801
MRPS15	0.473948	0.396761
RBBP4	0.46466	0.381075
DNAJC3	0.457303	0.36782
KRT23	0.382222	0.134626
ID3	0.391871	0.180683
SHARPIN	0.455675	0.36632
PPHLN1	0.443674	0.341597
PSMC6	0.472018	0.396298
MPG	0.470932	0.394557
TST	0.47244	0.39706
PLIN3	0.452539	0.36147
DNAJC7	0.464057	0.383166
TIMM8B	0.473887	0.399969
ACBD6	0.427874	0.305773
RRP15	0.433361	0.319765
RANBP2	0.456097	0.369172
IGFBP6	0.384212	0.149399
CD47	0.474309	0.401628
CBX1	0.439995	0.336486
PSMD12	0.454348	0.366784
MRPS23	0.466409	0.388955
PPP2R1A	0.476239	0.405346
ATF2	0.413099	0.265179
MEF2A	0.424677	0.299303
DDX27	0.443131	0.344631
MKLN1	0.436558	0.330218
PARD3	0.410988	0.259883
OCLN	0.450428	0.360859
SRSF10	0.477023	0.408111
HSPB11	0.443734	0.347579
IFT57	0.440538	0.340882
UGCG	0.455192	0.371838
NPNT	0.440478	0.341626
ZBTB10	0.396635	0.211485
MAP1LC3A	0.449704	0.361941
LAPTM4B	0.463153	0.387364
DDAH2	0.471415	0.401317
SERPINE1	0.368351	0.0714503
LYPLA1	0.466771	0.394082
DENR	0.457544	0.378115
CNDP2	0.456097	0.375836
CSNK1D	0.462731	0.388459
LSM2	0.46261	0.389203
NELFE	0.455554	0.376938
GPR108	0.437764	0.340391
MARCH6	0.454951	0.376013
CAMTA1	0.464419	0.393479
NDUFS3	0.465987	0.396139
AFG3L2	0.42329	0.306149
PWP1	0.437161	0.34052
MRPL3	0.461102	0.389053
NIPSNAP2	0.451393	0.371273
WDR33	0.452056	0.372667
PHLDB2	0.370341	0.0959812
NOP56	0.452539	0.373988
PSMD14	0.451453	0.371927
LARP7	0.43499	0.337832
RNF13	0.452117	0.373946
ATXN2	0.433301	0.334845
PLXNB2	0.482511	0.425009
MRPL42	0.463454	0.395643
TXN2	0.469183	0.405199
EZR	0.500302	0.448698
BAIAP2L1	0.467193	0.402007
MINDY2	0.441865	0.354734
COPB2	0.457665	0.386252
GLRX3	0.449825	0.371927
HAGH	0.442468	0.357306
AP2S1	0.479556	0.422219
CEBPZOS	0.446689	0.36611
GTF3A	0.471294	0.409921
KIDINS220	0.422928	0.311506
NSMCE1	0.431432	0.333395
ATF7	0.416536	0.294484
PPP1R15B	0.430768	0.331993
G3BP2	0.450971	0.375532
PPP2R2A	0.446267	0.366493
HTATIP2	0.456941	0.386925
DSEL	0.382282	0.169418
FKBP3	0.447353	0.368949
PTS	0.445966	0.366432
MAOB	0.37993	0.159215
AHSA1	0.457846	0.389367
NDUFA9	0.452901	0.380363
SRPK2	0.417622	0.300364
RPL7L1	0.443372	0.36258
ATF7IP	0.411591	0.283465
COPS8	0.418164	0.302555
DCTPP1	0.457182	0.389761
MRPS14	0.434266	0.344231
MCRIP2	0.450308	0.377802
LARP6	0.37999	0.164102
PTPN14	0.391991	0.217339
H1F0	0.477265	0.423598
AC245297.3	0.412857	0.289834
POP7	0.448679	0.376205
JPT1	0.493849	0.446689
NBN	0.409118	0.279677
CEP57	0.43903	0.356947
ALG5	0.451272	0.38157
PLEC	0.462972	0.403079
NR2F6	0.468158	0.411493
SNAPIN	0.42516	0.325939
BIRC3	0.45471	0.389127
TSG101	0.457363	0.393959
[truncated: 18,713 more rows]
