# Supplementary material for: Single-cell transcriptomic analysis suggests two molecularly distinct subtypes of intrahepatic cholangiocarcinoma
Source: Nat Commun. 2022 Mar 28;13:1642. doi: 10.1038/s41467-022-29164-0 (PMC8960779; doi:10.1038/s41467-022-29164-0)
Supplement: Supplementary file 8 — Supplementary Data 5 [file 41467_2022_29164_MOESM8_ESM.xlsx]

## Sheet: Sheet1
Supplementary Data 5. Differential expression genes between S100P+SPP1- and S100P-SPP1+ tumor cells.
Gene	logFC	logCPM	F score	P-value
SPP1	-8.5699	11.5064	23254.1	0
VTN	-6.33956	9.70492	11922.4	0
CRP	-6.2609	9.81424	8920.36	0
APCS	-5.79381	9.43737	10008.3	0
AGT	-5.67469	9.25692	18940.7	0
CRYAB	-5.01351	9.41519	7580.57	0
FXYD2	-4.98232	9.29627	14000.8	0
RGS5	-4.9637	8.65337	6445.63	0
DCDC2	-4.72881	9.13202	21071	0
FGG	-4.70522	8.78522	6255.42	0
ID4	-4.58053	8.38528	10165	0
ITIH5	-4.43794	8.33878	13835.8	0
DEFB1	-4.24876	11.1788	14294.2	0
AMBP	-4.18622	8.16066	6668.34	0
ORM1	-4.06872	8.17116	5593.83	0
VIM	-4.04118	10.3426	10762.8	0
MSMP	-3.93735	8.07878	4840.89	0
SULT1C4	-3.91379	8.03747	8814.59	0
CDH6	-3.89937	8.0454	11175.1	0
ALB	-3.64818	9.82172	3916.74	0
MAP1B	-3.61951	8.03627	7117.49	0
CLDN10	-3.58123	8.80919	6829.2	0
MEG3	-3.57381	7.94707	6721.65	0
FGA	-3.55169	8.21959	4808.12	0
SERPINE2	-3.53131	8.86027	6688.74	0
LIMCH1	-3.49466	8.0159	10462.9	0
ITIH2	-3.45349	7.93975	5325.74	0
SERPINA1	-3.36077	12.3677	2912.97	0
S100A1	-3.27771	7.8975	7136.63	0
CITED4	-3.21775	9.94429	8051.55	0
CREB5	-3.16747	8.03483	7916.87	0
PROX1	-3.15441	8.04097	9420.65	0
CCL2	-3.15278	7.82166	4621.38	0
CALD1	-3.14696	8.24825	7112.74	0
XIST	-3.14056	8.02695	5387.1	0
SERPINA5	-3.12232	7.83585	8831.2	0
NEB	-3.10331	8.33704	3628.61	0
ZBTB20	-3.09129	9.6989	12972.6	0
ATF3	-3.0795	10.238	4638.63	0
SERPING1	-3.07041	8.71593	8244.58	0
CPB2	-3.06794	7.74392	6435.31	0
KRT23	-3.05971	8.4287	5009.11	0
CDH2	-3.04448	7.77818	7180.69	0
GC	-3.0259	7.76618	4965.08	0
APOH	-3.00776	7.73009	6950.83	0
TSHZ2	-3.00654	7.98074	6415.8	0
RBP1	-2.98925	7.85775	5596.5	0
F5	-2.98655	8.31022	5336.09	0
SERPINE1	-2.9804	8.00949	5337.92	0
EEF1A2	-2.97778	7.99793	7830.73	0
PKHD1	-2.94044	7.85872	7967.79	0
ALKAL2	-2.91564	7.70537	7110.13	0
SERPINA6	-2.90311	7.70995	7558.38	0
ONECUT1	-2.88072	7.87999	8265.55	0
FGB	-2.86353	8.11798	3029.9	0
CEACAM7	-2.83654	7.79096	5156.69	0
CHST9	-2.80885	7.76443	7873.68	0
ARL4C	-2.80655	9.21244	6321.61	0
ANKRD1	-2.79758	7.71065	4465.25	0
SPON2	-2.73295	7.94419	5688.49	0
UGT2B7	-2.726	7.79964	5263.12	0
FDCSP	-2.71123	7.64676	2695.52	0
PLAC4	-2.7007	7.66424	4129.32	0
THBS1	-2.68244	8.05181	4246.1	0
CXCL6	-2.67856	8.0819	3900.03	0
APOB	-2.67335	7.65919	5092.1	0
IGFBP6	-2.6707	8.20922	4243.63	0
TNS1	-2.65671	7.72889	7508.71	0
A2M	-2.65378	7.66534	4529.57	0
GAMT	-2.60313	8.20603	4280.68	0
PPARGC1A	-2.60287	7.68881	6382.26	0
TM4SF4	-2.58181	9.43528	5209.09	0
RGS4	-2.57446	7.62452	5167.74	0
BICC1	-2.5668	8.57295	7999.01	0
CXCL2	-2.54457	9.21408	3057.86	0
SCTR	-2.53533	7.9299	4370.92	0
ASGR2	-2.52769	7.62237	5632.72	0
CNTNAP3B	-2.52202	7.79391	4395.42	0
C5orf46	-2.51225	7.70638	3662.86	0
PBX1	-2.50692	8.12662	4960.27	0
TTYH1	-2.50242	7.68615	4961	0
CYR61	-2.50118	8.82468	3955.83	0
CXXC5	-2.49381	8.08701	6995.81	0
MAB21L2	-2.48628	7.60529	5164.88	0
CADM1	-2.46461	7.63376	6946.71	0
PTH2R	-2.46161	7.636	5403.91	0
FAM171A1	-2.43726	7.74157	6242.18	0
KRT81	-2.4103	8.01539	2362.1	0
ANXA9	-2.36313	7.74786	5529.18	0
PCSK1N	-2.3621	8.0727	3407.04	0
SFRP5	-2.35165	7.75028	3537.52	0
CLU	-2.35111	10.3629	5361.13	0
HPN	-2.35013	7.72994	5677.05	0
ACSM2B	-2.33533	7.58093	5707.25	0
AC104461.1	-2.32939	7.5967	5344.73	0
C1R	-2.32758	7.80702	3930.77	0
HOMER2	-2.30312	7.74158	5217.12	0
ORM2	-2.29908	7.5734	4650.23	0
MEIS2	-2.29781	7.86504	4963.4	0
PDGFD	-2.2931	7.79444	4046.79	0
TMEM156	-2.29026	7.6269	6040.94	0
PIK3AP1	-2.28098	7.89019	5348.05	0
CMYA5	-2.27606	7.64798	4807.13	0
IGFBP1	-2.25166	8.82248	1976.94	0
RASSF4	-2.24995	7.74174	4635.97	0
SCD5	-2.22665	7.63372	5209.93	0
GYPC	-2.20952	7.66592	5308.61	0
CLDN9	-2.20038	7.58622	4516.65	0
C1S	-2.19062	7.73354	3341.85	0
FST	-2.18463	7.56099	4233.65	0
ITGB1-DT	-2.18402	7.56912	5810.61	0
PDGFA	-2.18324	8.07683	4604.85	0
HSPB8	-2.17394	7.54739	6351.51	0
HABP2	-2.14969	7.54384	5448.82	0
LBP	-2.1489	7.5285	3236.15	0
TUBA1A	-2.13229	8.4229	3422.71	0
PHLDB2	-2.12246	7.68877	4563.56	0
SLIT3	-2.1217	7.54302	5340.51	0
NUAK2	-2.12096	7.62341	4029.61	0
SLC34A2	-2.11713	7.93156	3634.41	0
ELK4	-2.11053	8.43518	5174.57	0
SMIM24	-2.10956	7.79091	3686.15	0
PDZK1	-2.10785	7.84843	4331.87	0
RNF150	-2.10557	7.54028	5523.69	0
MAOB	-2.09678	7.79878	4191.56	0
PAEP	-2.09596	7.53903	3637.18	0
SNAP25	-2.09443	7.60659	4965.25	0
GLS	-2.09004	8.3647	4813.22	0
CTTNBP2	-2.07635	7.5587	5215.35	0
CASC15	-2.07135	7.54705	5842.22	0
C3	-2.04551	9.2172	2519.51	0
VTCN1	-2.0395	7.57066	4095.63	0
LAMB1	-2.0207	7.71664	4150.01	0
CXCL8	-2.0207	9.57792	2020.86	0
KANSL1L	-1.99648	7.96115	4058.78	0
CEP170	-1.98119	8.10917	3388.49	0
SPHK1	-1.98053	7.60745	4043.64	0
RBP4	-1.97458	7.80285	2035.15	0
SUCNR1	-1.966	7.56643	3049.85	0
ACSM3	-1.96295	8.03226	2760.15	0
CAVIN2	-1.95664	7.53122	5035.59	0
FRMD4A	-1.94814	7.63137	4222.97	0
NEURL3	-1.94646	7.729	3310.37	0
TUBB2B	-1.94116	7.58896	3586.88	0
PBX3	-1.93063	7.67737	3993.47	0
A1CF	-1.93044	7.52788	5003.32	0
EGLN1	-1.92254	8.28668	4529.55	0
ALCAM	-1.91486	7.93618	3564.3	0
RORA	-1.912	7.63809	4021.15	0
REG3A	-1.91112	7.70756	1716.2	0
THBD	-1.90309	7.56327	3815.07	0
C5	-1.89697	7.55267	3564.71	0
TFPI2	-1.88456	7.66719	2687.9	0
FILIP1L	-1.88445	7.61625	2934.34	0
MCAM	-1.88388	7.53373	4627.76	0
VEPH1	-1.8822	7.54445	4667.49	0
APCDD1	-1.87223	7.54604	3804.85	0
RAPGEF5	-1.8659	7.91936	4016.37	0
INHBB	-1.85894	7.51937	4191.27	0
CAVIN1	-1.85504	7.71592	3568.96	0
MAP2	-1.84266	7.51767	4743.59	0
TM4SF18	-1.84069	7.61947	3467.97	0
BCO2	-1.83458	7.6837	3252.19	0
COL18A1	-1.83354	7.94322	3814.55	0
SDC2	-1.8303	7.51349	4512.3	0
ADAMTS1	-1.82775	7.50943	4255.8	0
DUSP1	-1.82645	10.4353	3317.52	0
TNFRSF19	-1.82342	7.53079	4334.53	0
SEMA6A	-1.81443	7.88475	3189.73	0
RASSF8	-1.81222	7.66012	3855.52	0
SNX10	-1.81169	7.86382	3184.89	0
SHC2	-1.81145	7.76247	3857.48	0
FZD1	-1.81055	7.64087	3350	0
PTPRD	-1.80997	7.49535	5379.82	0
HDGFL3	-1.80162	7.62852	3867.04	0
CFI	-1.79301	7.53957	3890.54	0
PDGFC	-1.78756	7.67928	3500.08	0
NFIC	-1.77029	8.19152	4706.58	0
C5orf38	-1.76738	7.49063	4066.56	0
GABRE	-1.76629	7.53719	4101.63	0
DNM1	-1.75945	7.54394	4174.7	0
SLC17A4	-1.75293	7.48291	5593.5	0
SCGN	-1.74795	7.49635	3605.89	0
FOSB	-1.74191	9.49813	2430.79	0
TACC1	-1.73505	8.36873	3556.57	0
MMP10	-1.73498	7.4969	2867.01	0
APOA2	-1.73459	7.48347	3020.12	0
LARP6	-1.72659	7.69283	3443.56	0
NLGN1	-1.7224	7.50603	3718.79	0
ARHGAP29	-1.72136	8.09708	3488.46	0
NNMT	-1.72114	8.57548	1392.79	1.05474e-294
AC245595.1	-1.71938	7.72372	2965.57	0
EPHX1	-1.7192	8.04951	2473.07	0
F10	-1.70656	7.48987	5207.92	0
AC147651.2	-1.70281	7.47981	5511.13	0
FNDC4	-1.69966	7.66891	3154.18	0
GLIS3	-1.69724	7.74925	3112.77	0
PKD2	-1.69193	7.55773	3481.75	0
LINP1	-1.69168	7.48815	4175.73	0
CPQ	-1.69075	7.55233	3819.43	0
AKR1C1	-1.69033	8.82015	1826.69	0
ACMSD	-1.68778	7.48311	5003.04	0
DTNA	-1.67885	7.48848	4884.68	0
AKAP7	-1.67791	7.61941	2434.26	0
DSEL	-1.67579	7.7507	2884.25	0
NCF2	-1.66488	7.49733	3723.86	0
FGF12	-1.65949	7.4672	5436.81	0
ZNF467	-1.65281	7.53105	3762.98	0
SNRPN	-1.62917	8.35636	3285.46	0
AC147651.1	-1.62818	7.49622	3973.56	0
ABCB1	-1.62466	7.50532	3078.32	0
LTC4S	-1.62447	7.57971	3092.22	0
PLCXD2	-1.62444	7.53312	3478.2	0
FN1	-1.62314	8.90072	1203.18	5.06917e-256
APOA1	-1.61681	7.4758	2839.43	0
DNAH5	-1.61619	7.58329	2589.79	0
CFH	-1.61111	7.68238	1611.98	0
PAH	-1.60851	7.45871	5068.62	0
HTRA1	-1.60698	7.55865	3199.72	0
FAXDC2	-1.60693	7.49605	4226.26	0
TTR	-1.6064	7.50204	2765.91	0
NDN	-1.606	7.46414	5823.24	0
COL9A3	-1.60537	7.51415	3433.16	0
AFDN	-1.60267	8.46034	3417.14	0
DAB2	-1.60055	7.6631	2304.77	0
FLRT2	-1.59632	7.47143	4057.38	0
ANXA13	-1.58586	8.09596	2208.92	0
NES	-1.58265	7.46867	4523.32	0
ANGPTL1	-1.58201	7.47525	3518.54	0
HIP1	-1.58043	7.56459	3155.3	0
AL355102.4	-1.58007	7.45991	5364.24	0
TUSC3	-1.5797	7.79613	3067.99	0
HUNK	-1.57885	7.47529	4690.42	0
LAT2	-1.57479	7.50461	3717.7	0
MARK1	-1.57359	7.47047	4177.07	0
FGFR1	-1.57269	7.59641	2663.16	0
TMEM132A	-1.57067	7.64602	2551.57	0
PTHLH	-1.56877	7.47694	3918.44	0
ZNF43	-1.56662	7.50268	3709.03	0
GP2	-1.56284	7.62622	1510.91	1.26741671996363e-318
CTSH	-1.55769	8.95597	2175.7	0
LYPD1	-1.55715	7.46321	4709.64	0
ID2	-1.55653	8.53258	2870.23	0
AKR1C2	-1.55477	7.60263	1832.11	0
MTCL1	-1.55443	7.74235	2449.76	0
THSD4	-1.55064	7.55525	2951.53	0
IL6ST	-1.54107	8.24379	3503.58	0
UTRN	-1.53844	7.93835	2378.48	0
ORAI2	-1.53151	7.64446	2630.11	0
GABARAPL1	-1.53022	7.91513	2673.24	0
EPB41L4A	-1.52448	7.56164	2950.11	0
WFDC2	-1.52333	8.58992	1681.83	0
PROS1	-1.52001	7.60983	2570.95	0
DNAJC22	-1.51923	7.72864	2693.79	0
CPPED1	-1.51751	7.55155	3097.93	0
GMNN	-1.5129	8.37189	2581.37	0
FKBP5	-1.51205	7.74188	2585.97	0
TGFB2	-1.5101	7.62251	2222.27	0
ASAP1	-1.51004	7.77345	2701.9	0
ENAH	-1.51003	8.26633	3209.19	0
APBB1IP	-1.49996	7.54084	2349.25	0
BAAT	-1.49036	7.67238	2258.39	0
FBXO17	-1.48979	7.5132	3284.48	0
TOX	-1.48239	7.66736	1992.94	0
AC013271.1	-1.48219	7.54171	2640.07	0
ART4	-1.46465	7.4515	4636.95	0
CSGALNACT1	-1.46368	7.55342	2664.67	0
MDFIC	-1.46345	7.60496	2555.76	0
AKT3	-1.45013	7.51653	2861.17	0
PIEZO2	-1.44855	7.46541	3678.67	0
ST3GAL5	-1.44722	7.4852	3303.97	0
RGS3	-1.44642	7.64263	2425.09	0
INHBA	-1.44476	7.47049	2868.1	0
PDE9A	-1.44461	7.48834	3453.69	0
TRABD2B	-1.4434	7.44849	5122.56	0
PTPN13	-1.43564	7.61628	2232.41	0
LRIG3	-1.4322	7.80689	2002.56	0
PCNX2	-1.43208	7.60177	2415.68	0
ZNF704	-1.42954	7.57475	2384.59	0
EGR4	-1.42841	7.46237	3186.4	0
MYEF2	-1.42745	7.59164	2485.81	0
CHI3L1	-1.42499	7.45466	3032.24	0
EGR1	-1.41706	9.3535	1559.09	0
ZNF281	-1.41534	7.87875	2459.31	0
WNT2B	-1.41526	7.48973	2482.43	0
IRX2	-1.41136	7.44507	3462	0
PAX2	-1.40767	7.44945	4384.06	0
ERICH5	-1.40505	7.59561	2407.44	0
MYO1B	-1.40218	7.8542	2347.89	0
RBPMS	-1.39994	8.18108	2669.69	0
GAL3ST1	-1.3974	7.74794	2007.59	0
UGT2A3	-1.39271	7.96374	1904.87	0
MAPK10	-1.3813	7.46907	3353	0
GRB10	-1.37686	7.62895	2303.97	0
NR5A2	-1.3767	7.48767	2964.52	0
SPEG	-1.37379	7.52391	2568.78	0
RIC8B	-1.37363	7.5615	2217.27	0
ITGB1	-1.37206	10.291	3233.2	0
RIC3	-1.37139	7.44186	4273.57	0
RASSF8-AS1	-1.36887	7.50265	2822.12	0
ASGR1	-1.36865	7.46166	2963.57	0
CPEB4	-1.36728	7.76818	2074.83	0
SMYD2	-1.36602	7.8016	2519.58	0
BCL2	-1.36333	7.52168	2427.75	0
KCNJ16	-1.36324	7.44032	4640.56	0
TRMT9B	-1.3581	7.44012	4788.52	0
VAMP5	-1.35553	7.9719	2132.97	0
CCDC9B	-1.35114	7.52255	2545.08	0
AAK1	-1.35081	7.90817	2230.8	0
TESC	-1.35056	9.63064	1622.83	0
EN2	-1.34704	7.46592	3167.22	0
MAP3K20	-1.34497	7.99528	2307.64	0
CDKN1A	-1.33426	7.985	1857.74	0
MCL1	-1.32855	8.9428	3324.14	0
NFIX	-1.32575	7.62798	2145.2	0
SLC16A7	-1.32527	7.78312	1917.78	0
GADD45B	-1.31746	8.90327	1534.2	2.47032822920623e-323
ID3	-1.31728	8.03694	1297.2	3.03059e-275
PRICKLE1	-1.31	7.46704	2932.38	0
TSPAN4	-1.30989	7.61635	2068.09	0
HSD11B1	-1.3082	7.42533	3968.26	0
MKKS	-1.30795	7.81406	2244.32	0
HP	-1.30584	7.43612	2751.53	0
RHOQ	-1.30131	7.63152	1973.35	0
LOXL4	-1.29964	7.46219	3021.26	0
MAP3K1	-1.29815	7.96589	1897.82	0
PWAR6	-1.29806	7.47875	2850.17	0
EGOT	-1.29779	7.43886	3836.34	0
FGFR3	-1.28373	7.74931	1735.78	0
RNF19A	-1.28238	8.54333	2495.72	0
LRRK2	-1.28208	7.44394	3665.57	0
CTNND2	-1.27808	7.43014	4614.45	0
IL32	-1.27285	9.45711	2428.72	0
SHTN1	-1.26851	7.89652	2164.69	0
TNNT1	-1.26774	8.0423	1717.3	0
DBN1	-1.26731	7.69409	1969.44	0
CFHR1	-1.26731	7.42447	3707.79	0
KLHL5	-1.26658	7.6233	2065.32	0
TP53INP1	-1.2654	7.67397	1601.93	0
POLR2J3.1	-1.26528	8.22805	2030.52	0
CERS2	-1.257	8.52756	3479.23	0
SIRPA	-1.25554	7.59628	1945.27	0
ALPK2	-1.25378	7.43032	4148.7	0
CD163L1	-1.25353	7.45971	2722.36	0
EVC	-1.25214	7.43024	4675.6	0
SMARCD3	-1.24745	7.46451	2759.68	0
LPGAT1	-1.24698	8.22431	2318.79	0
MANCR	-1.24697	7.43831	3453.73	0
CFLAR-AS1	-1.24068	7.44908	2874.09	0
ZNF626	-1.23887	7.43851	3680.89	0
AZGP1	-1.23849	7.77183	1515.04	1.85561175265055e-319
KHDRBS3	-1.23679	7.47195	2445.09	1.50195956335739e-321
FXYD6	-1.23638	7.43036	4237.32	0
SULT1A1	-1.23278	7.69254	1894.8	0
SORBS1	-1.23263	7.58246	1767.95	0
AGBL3	-1.23155	7.47838	2512.46	0
RAB6B	-1.22921	7.47443	2582.7	0
SYCE1L	-1.22756	7.73683	1540.93	0
COL27A1	-1.22741	7.62975	1749.77	0
KANK2	-1.22509	7.56072	1953.62	0
APOE	-1.22472	7.8952	1036.4	1.04941e-221
PXDC1	-1.22422	7.65545	1786.24	0
C1QL1	-1.22252	7.44302	2861.74	0
CAMSAP2	-1.22004	7.73275	1775.8	0
RGS17	-1.21582	7.44184	3252.33	0
STK17A	-1.21255	7.94209	1754.85	0
ZFHX4	-1.21236	7.47357	2365.88	0
SHC1	-1.21118	7.96588	2011.29	0
PTGFR	-1.20809	7.42592	3848.18	0
C2orf74	-1.2073	7.58394	1886.86	0
DPYSL2	-1.20214	8.19288	1738.84	0
CAV1	-1.20122	8.25946	1652.86	0
CES1	-1.19396	7.43071	2744.98	0
AC092336.1	-1.19353	7.4214	3237.7	0
MYLK	-1.18832	7.49005	1950.9	2.07397871051685e-313
CRISP3	-1.18614	7.42264	3097.53	0
TROVE2	-1.18291	8.04449	2141.87	0
CSPP1	-1.18232	7.84484	1524.28	2.53455676316559e-321
ZEB1	-1.18067	7.49342	1973.71	7.06625e-303
BGN	-1.18048	7.43841	2570.83	1.1113512637553e-319
SLC9A3R1	-1.17824	8.15405	1560.08	0
SOAT1	-1.1775	7.52661	1906.1	0
NMT2	-1.17687	7.57252	1791.2	0
SGCB	-1.17623	7.80231	1351.02	3.27241e-286
KCTD3	-1.17499	7.91802	1766.97	0
IFI16	-1.17356	7.98184	1625.85	0
RNF130	-1.17279	7.80076	1932	0
CHRDL2	-1.17096	7.41939	4136.02	0
LDOC1	-1.17008	7.47369	2316.82	4.84677e-308
PTPN14	-1.16751	7.70295	1681.68	0
PDE7B	-1.16642	7.43605	3147.67	4.89568892543653e-315
PDZD8	-1.16419	8.26905	1768.15	0
PHYHIPL	-1.16391	7.41622	3505.79	0
REEP6	-1.16302	7.63016	1536.14	9.88131291682493e-324
GTF2I	-1.15872	9.15655	2648.74	0
ACSM2A	-1.15865	7.42144	2761.73	0
ALDH3A2	-1.1566	7.83644	1625.27	0
SNORC	-1.154	8.19759	1329.43	8.14789e-282
ZBTB10	-1.15359	7.72627	1566.28	0
GULP1	-1.15298	7.80697	1364.06	7.29103e-289
CHST4	-1.15152	7.4957	1761.34	0
JCAD	-1.14763	7.44057	2676.54	4.04432379481584e-311
ZNF83	-1.14682	7.59504	1689.4	0
KIRREL1	-1.14675	7.42466	3713.38	0
NFIB	-1.14572	8.23197	1904.64	0
CRCT1	-1.14469	7.41396	3213.75	0
GNB5	-1.14379	7.60046	1725.71	0
KLF7	-1.14058	7.73937	1535.77	9.88131291682493e-324
KIF26B	-1.13763	7.43446	3023.36	7.18259e-304
ABI2	-1.13572	7.9772	1845.19	0
RPRD2	-1.1356	7.77614	1712.24	0
CXCL12	-1.13503	7.45825	2179.09	2.47739e-285
TNFRSF12A	-1.13446	8.93463	1643.69	0
GPC6	-1.1309	7.43639	2811.37	1.4113e-306
ZMIZ1	-1.12803	7.63114	1556.39	0
NDRG4	-1.1276	7.42155	3643.76	5.84479659030195e-321
JAZF1	-1.12525	7.54965	1603.36	3.96686824125391e-311
PTN	-1.12454	7.41902	3476.45	0
WNK2	-1.12395	7.56654	1564.37	6.60128015309867e-314
CYTOR	-1.12248	8.21622	1695.39	0
PIP4P2	-1.12248	7.54389	1766.54	0
BTG2	-1.12122	8.52503	1165.58	2.6173e-248
EBF4	-1.12109	7.43074	3225.12	1.15338e-296
AL138826.1	-1.11998	7.41349	3979.67	0
PLCB1	-1.11853	7.53756	1570.73	1.92752e-286
RBPMS-AS1	-1.11607	7.44482	2402.09	2.70766e-300
CEBPB	-1.11373	9.30502	1808.23	0
NAV2	-1.11094	7.48261	1883.92	6.4344e-294
TMEM45A	-1.10953	7.7418	820.347	7.81441e-177
TCN1	-1.109	7.52341	973.758	9.59772e-209
AC084033.3	-1.10868	7.49645	1848.67	2.1308e-273
TNS2	-1.10712	7.47439	1992.38	3.14937e-271
JUN	-1.10346	10.2951	1165.92	2.22867e-248
MPP6	-1.10073	7.64356	1481.98	8.88766251623062e-313
CRIM1	-1.10017	7.99391	1493.18	4.83974189018882e-315
PTP4A3	-1.09989	7.4615	2120.56	6.30588e-264
CHST13	-1.09676	7.43952	2612.19	2.31284e-276
TOR1AIP2	-1.09577	8.3137	2109.11	0
CAMK1D	-1.09538	7.43205	2759.74	2.82968e-285
ADAMTS10	-1.09401	7.41771	3667.19	2.50695677399197e-317
NME5	-1.09076	7.48532	1857.77	3.56477e-265
GUCA2B	-1.09058	7.41503	3120.49	0
CELF2	-1.09045	7.48749	1710.43	1.30197e-263
SCGB1D2	-1.08583	7.42009	3383.33	1.16615e-294
ZBED3	-1.08395	7.48272	1886.28	1.49015e-267
SEMA5A	-1.08331	7.45142	2172.75	2.96334e-258
FAM239B	-1.08116	7.41306	4371.32	5.43472210425371e-323
IL18	-1.0789	8.5333	860.003	4.17846e-185
KCNK15	-1.07788	7.43204	2487.63	1.18523e-305
SLC23A1	-1.07558	7.41575	3866.95	1.14897e-306
NR3C1	-1.0749	7.87041	1508.12	4.63240890197211e-318
CACNA1D	-1.07342	7.522	1488.61	4.1851e-271
NRP1	-1.06959	7.62761	1243.08	3.43141e-264
RIMKLB	-1.06944	7.49586	1501.4	3.1131e-245
KLF9	-1.06786	7.72288	1291.57	4.26908e-274
AC004540.2	-1.06404	7.41289	3908.84	1.00692590752515e-311
RAP1GAP	-1.06123	7.63871	1350.94	3.39267e-286
SFT2D2	-1.05976	7.92997	1458.39	5.27442e-308
ZNF708	-1.05712	7.50571	1639.27	2.98269e-258
ACKR3	-1.05596	7.42736	2653.7	1.47237e-267
SACS	-1.05588	7.46331	1870.21	1.23905e-239
KLF10	-1.05587	8.05284	1130.46	4.2971e-241
MIR22HG	-1.05487	7.57621	1256.92	5.08786e-267
PCDHGA10	-1.05285	7.49669	1554.89	9.57205e-234
RAB3IP	-1.05254	8.03729	1569.21	0
ZBTB16	-1.05197	7.41672	3387.06	7.33099e-283
CA9	-1.04914	7.92418	964.778	6.97455e-207
FAM20C	-1.0474	7.50246	1582.54	6.21887e-256
ADAMTS9	-1.04592	7.49068	1526.26	3.07519e-261
WWTR1	-1.04591	8.39577	1466.12	0
L3MBTL4	-1.04566	7.41394	3764.26	3.68797e-293
WWC1	-1.04444	7.76787	1231.01	1.01466e-261
NANOS1	-1.04151	7.44813	2046.84	3.57249e-236
PAQR5	-1.04087	7.52845	1485.34	2.03766e-296
AFF3	-1.03974	7.41063	3982.23	8.43812e-300
SLC30A10	-1.03896	7.42216	2966.49	8.79322e-279
COL4A4	-1.03796	7.45754	1894.65	9.71128e-229
SCAF11	-1.03742	8.47751	2014.47	0
FADS3	-1.03703	7.57661	1370.29	3.93765e-290
TEKT1	-1.03387	7.40729	3953.04	3.72852894505173e-315
PTPRM	-1.03372	7.46814	1837.07	1.93605e-243
GOT1	-1.03235	7.87286	1299.54	1.00778e-275
CEBPD	-1.03235	9.62925	1692.99	0
SPSB1	-1.03222	7.51402	1511.72	4.71678e-261
MCCC1	-1.02986	7.61896	1245.95	8.88272e-265
LONRF2	-1.02845	7.44013	2256.4	3.99669e-246
ZNF117	-1.02571	7.51593	1434.65	1.48607e-238
GABBR1	-1.02479	7.48838	1616.57	2.43049e-241
ARMCX2	-1.02257	7.46147	1866.33	2.62457e-236
NUCKS1	-1.02132	9.24393	2387.04	0
KIFAP3	-1.02127	7.62479	1382.58	1.25057e-292
CNTNAP3	-1.01886	7.45816	1691.86	3.88436e-226
SHISA4	-1.0167	7.49722	1606.8	1.06596e-250
IL1R1	-1.01669	7.52174	1362.1	2.10916e-256
SUCO	-1.01531	7.94054	1362.82	1.30099e-288
AL049839.2	-1.0149	7.48482	1365.71	3.72965e-245
MAP3K21	-1.01479	7.69112	1218.54	3.61077e-259
FTX	-1.01181	7.88274	1186.69	1.21829e-252
CLDN14	-1.00864	7.40608	3712.16	2.72394e-298
PSORS1C1	-1.00685	7.55493	1349.51	5.75304e-263
CCND2	-1.00338	7.4793	1431.26	2.51252e-221
FERMT2	-1.00126	7.49874	1494.77	4.36776e-239
SALL1	-0.998718	7.40279	4716.32	1.00233913745995e-317
KCNK9	-0.995085	7.41321	3059.42	3.33469e-276
SHISA9	-0.993669	7.40597	3813.01	5.65166e-291
TEAD2	-0.992101	7.465	1720.41	1.01494e-233
AC007388.1	-0.991813	7.697	1262.4	3.85293e-268
GLDC	-0.989799	7.41786	2711.72	4.84497e-243
HNF1B	-0.989437	7.76451	1239.06	2.28479e-263
RHOB	-0.98862	9.74409	1146.45	2.22072e-244
TRIP12	-0.988026	8.06324	1335.58	4.55298e-283
DLC1	-0.987928	7.42216	2498.89	1.56663e-230
GON4L	-0.987652	7.80174	1390.19	3.56552e-294
ZBTB20-AS2	-0.986283	7.4478	1872.75	1.66371e-211
CFL2	-0.984716	7.53202	1335.11	1.62448e-240
CLASP1	-0.982932	7.5832	1247.29	1.87148e-260
SH3PXD2B	-0.982752	7.50016	1379.7	4.76456e-219
CASTOR3	-0.982654	7.45819	1724.62	4.86671e-213
RRM2B	-0.981029	7.62188	1162.73	1.00563e-247
BBOX1	-0.980875	7.40202	2930.48	4.12419e-306
PLXDC2	-0.98056	7.52922	1110.84	3.35802e-212
ID1	-0.979687	9.30488	867.887	9.51235e-187
KIF12	-0.978928	7.77084	1121.8	2.5946e-239
GAS2L3	-0.97842	7.62051	1033.02	5.2535e-221
CERCAM	-0.978018	7.48978	1381.53	1.84238e-200
SCRN1	-0.977155	7.80261	1201.42	1.16317e-255
SAMD11	-0.976733	7.40739	3539.51	2.13689e-260
CYP3A5	-0.974964	8.91753	1183.36	5.87632e-252
NEO1	-0.973858	7.6206	1184.38	3.62103e-252
EML4	-0.971307	8.08715	1373.06	1.07831e-290
SLC38A11	-0.970555	7.42962	1988.78	7.8347e-243
SUSD4	-0.970371	7.41939	2573.74	3.71776e-245
PF4V1	-0.967196	7.41507	2511.41	5.75587e-242
MALT1	-0.967176	7.59168	1190.83	1.72427e-253
AL445647.1	-0.967032	7.40395	4001.77	1.50687e-270
TMEM169	-0.966355	7.41723	2689.89	3.61924e-230
CFAP221	-0.965659	7.48331	1472.33	5.38473e-222
HCG18	-0.965648	7.59532	1189.03	4.03416e-253
IRX3	-0.965489	7.4671	1439.83	2.66567e-195
TMEM176B	-0.962399	8.56336	999.066	5.50819e-214
KATNAL2	-0.962119	7.40703	3501.65	1.32138e-254
RETREG2	-0.959209	7.92255	1409.83	3.67056e-298
SLC26A2	-0.959131	7.49897	1303.68	3.15693e-220
EPDR1	-0.958694	7.60393	1149.23	5.9589e-245
ANKRD33B	-0.958412	7.41438	2753.87	5.66344e-229
ZNF618	-0.956075	7.52774	1235.59	1.15281e-228
WNT5A	-0.955695	7.40764	3086.6	4.607e-243
TIMP2	-0.952716	8.31409	1196.04	1.47184e-254
GSDME	-0.951378	7.43783	1882.13	4.21814e-202
PLIN5	-0.94794	7.43306	1881.26	1.53991e-237
PARD3	-0.947706	7.75174	1166.79	1.47373e-248
TMPRSS6	-0.946823	7.41062	2768.81	4.4675e-237
ATF2	-0.946136	7.75531	1130	5.34401e-241
SYT11	-0.944278	7.41764	2444.99	5.47252e-217
RNF115	-0.94189	7.83215	1289.38	1.19496e-273
ATP8A2	-0.94138	7.39986	4042.46	4.61402e-277
WDR91	-0.940357	7.58408	1059.07	2.1933e-226
AL365203.2	-0.939828	7.44094	1816.95	3.23396e-207
SLFN13	-0.939275	7.56594	1089.53	1.98991e-224
MEAF6	-0.93892	8.35516	1070.86	8.09051e-229
EGR3	-0.93888	7.52481	979.807	3.26377e-204
DNER	-0.938275	7.41952	2035.91	6.2002e-203
LIN7A	-0.935386	7.40079	3981.14	7.3467e-265
CERS4	-0.934365	7.41217	2827.3	9.20224e-226
PPP1R10	-0.933876	7.98526	1177.26	1.04491e-250
MBNL1	-0.933043	8.38777	1436.42	1.49223e-303
C14orf132	-0.932871	7.40558	3256.69	1.16749e-237
GPSM2	-0.931308	7.6402	941.48	4.74575e-202
ADRA2C	-0.929961	7.42215	2255.53	2.40695e-213
RAI2	-0.928172	7.40555	3282.92	1.08279e-233
TNFSF14	-0.927699	7.42011	2079.62	3.03768e-228
ZNF347	-0.927611	7.43033	2003.86	8.45513e-204
FAM53C	-0.927528	7.70764	943.773	1.58664e-202
CYFIP2	-0.925907	7.52422	1200.43	1.10139e-217
KLHL36	-0.92538	7.71968	1106.11	4.39666e-236
NFKBIA	-0.924937	9.33073	1086.41	5.03146e-232
SYT12	-0.924857	7.45129	1453.86	2.12508e-214
DSTYK	-0.924335	7.5543	1158.2	5.76215e-229
AC005482.1	-0.923232	7.39965	2910.44	4.92496e-262
MTR	-0.922368	7.70091	1045.14	1.64769e-223
SRPX2	-0.922259	7.40362	3174.3	2.72761e-243
HOOK3	-0.922218	7.88705	1149.73	4.69658e-245
AC245297.3	-0.922092	7.80626	1085.32	8.45057e-232
TSPAN33	-0.921713	7.51957	1119.12	2.72666e-184
LINGO1	-0.921425	7.39918	3981.93	9.12168e-262
MPDZ	-0.921385	7.40189	3679.91	5.19845e-250
PGBD5	-0.920652	7.43709	1745.52	2.4008e-191
DST	-0.920014	8.61885	1299.88	8.59095e-276
LINC02188	-0.919734	7.40485	3221.1	1.39213e-232
PID1	-0.918814	7.43492	1715.5	2.70338e-188
TMX4	-0.91814	7.79152	1137.77	1.35015e-242
ARMCX1	-0.917981	7.433	1915.99	4.20486e-202
BEX2	-0.916994	7.69329	986.496	2.20527e-211
PHLDB1	-0.914809	7.47395	1326.87	1.58626e-182
ZSCAN18	-0.911871	7.42248	2131.44	3.0024e-199
DUSP5	-0.91154	7.67064	805.938	7.98976e-174
ABCC4	-0.909546	7.44849	1554.96	9.62201e-186
LAMC1	-0.909515	7.93254	1139.2	6.85172e-243
CEP112	-0.90902	7.43682	1732.18	2.75692e-181
PIAS2	-0.908551	7.5025	1203.39	3.16373e-191
C17orf97	-0.90843	7.46899	1374.32	2.36792e-183
ITGB8	-0.90784	8.26428	957.293	2.48631e-205
AL645608.8	-0.905588	7.43067	1848.85	2.2619e-187
ZNF91	-0.903787	7.64432	1041.01	1.17462e-222
TPR	-0.903537	8.46221	1488.08	5.20761428431157e-314
TMEM136	-0.903389	7.44755	1590.19	1.2303e-188
RAB17	-0.903124	7.72004	1098.74	1.44831e-234
TPM1	-0.90283	9.70372	1183.04	6.83849e-252
SERPINA3	-0.902077	7.41976	1954.24	4.6438e-210
NRG1	-0.901506	7.4083	2716.58	1.13219e-208
TDRP	-0.899769	7.42045	2138.87	6.83788e-194
CCDC50	-0.899006	8.06127	1114.65	7.68942e-238
KCNMA1	-0.898824	7.48682	1022.03	2.84794e-189
TGOLN2	-0.898478	8.42827	1505.46	1.59947824053353e-317
CFTR	-0.898308	7.80672	575.701	1.9522e-125
RGN	-0.898149	7.42567	1952.77	6.22744e-187
TLN1	-0.898082	7.8355	1128.84	9.24118e-241
CTSC	-0.895483	8.51603	779.465	2.74011e-168
PCDHB16	-0.894987	7.41925	2098.94	6.56802e-188
2021-09-02	-0.889886	8.7686	1622.34	0
FAM200B	-0.888811	7.86596	1039.56	2.3347e-222
NAIP	-0.888721	7.47012	1279.6	1.3515e-176
ANO4	-0.888252	7.41253	2293.25	1.70556e-192
BEX4	-0.887122	7.60575	964.196	1.24362e-203
ADAMTS9-AS1	-0.886519	7.39812	2529.24	3.54389e-240
BEX1	-0.884449	7.3936	3905.72	2.17958e-274
TBC1D8	-0.883892	7.50263	1182.51	2.61138e-194
CCL20	-0.883842	8.82936	356.28	8.87814e-79
PDGFRA	-0.883244	7.4065	2346.74	4.58832e-207
TRIM38	-0.883023	7.65842	969.632	6.87462e-208
KIFC3	-0.882053	7.58453	1021.88	1.04994e-218
FGFR4	-0.882031	7.84687	1044.5	2.22522e-223
MAN2A1	-0.88167	7.88943	988.002	1.07541e-211
CPNE7	-0.87555	7.43214	1721.37	7.43523e-195
SCN1B	-0.874455	7.44243	1412.06	7.29853e-160
TUBB6	-0.874144	7.61777	980.396	4.04508e-210
PLEKHA3	-0.874126	7.85483	1107.78	1.99731e-236
METRN	-0.873341	8.12761	1021.02	1.58124e-218
KCNQ1OT1	-0.872783	7.84423	722.062	2.91921e-156
ARID4B	-0.871386	8.30192	1286.04	5.74044e-273
LRMDA	-0.870817	7.4984	1178.71	1.71488e-191
SMAD7	-0.869488	7.48067	1158.27	4.61864e-170
SPATS2	-0.868787	7.65004	999.184	5.20754e-214
PCLO	-0.8684	7.71151	831.876	3.06425e-179
SLC13A1	-0.864952	7.39358	2674.2	5.15898e-251
BNIP3	-0.864069	8.06288	786.356	9.91452e-170
AC044849.1	-0.85783	7.47359	1143.79	4.92617e-169
ZNF493	-0.855176	7.51591	1024.74	3.06367e-176
ADAMTSL3	-0.854592	7.3961	3562.99	1.61785e-221
OLFM1	-0.853647	7.40431	2694.9	1.12596e-201
SMIM29	-0.853298	7.5869	963.74	1.76776e-204
G6PC	-0.853292	7.39174	3942.52	5.1909e-259
LAMP2	-0.851805	8.27218	1225.82	1.16933e-260
ZFHX3	-0.851704	7.6976	943.318	1.97161e-202
GRAMD1B	-0.850841	7.4938	1077.12	4.09303e-173
ZNF160	-0.849379	7.51	1069.91	7.96855e-182
RDX	-0.846869	7.99087	1030.05	2.15007e-220
AL355338.1	-0.846529	7.52693	987.583	1.08657e-207
CDK14	-0.843896	7.51175	1014.86	1.83406e-176
LYPLAL1	-0.842719	7.90114	1086.08	5.89712e-232
MAP10	-0.841802	7.43545	1519.16	3.29514e-162
SYNM	-0.841475	7.40252	2649.19	5.92159e-191
TAF3	-0.840847	7.64423	887.157	9.25026e-191
CACNA1H	-0.838111	7.40896	2290.52	1.21666e-182
FGFR2	-0.83781	7.70138	855.969	2.89569e-184
RFC1	-0.837189	7.95075	1119.16	9.0581e-239
DNAJB2	-0.835659	7.83698	968.934	9.5927e-208
SEMA4A	-0.835295	7.41689	1777.95	3.48098e-170
KRT80	-0.834427	7.59032	833.044	1.74857e-179
CRIP2	-0.832369	8.05867	828.158	1.82993e-178
JUND	-0.831448	10.3271	1386.43	2.0683e-293
NGEF	-0.831346	7.57935	895.335	2.82919e-185
MAP4K3	-0.830648	7.77792	866.345	1.99371e-186
COLGALT2	-0.829824	7.42566	1329.69	2.69935e-152
BASP1	-0.829443	7.49295	829.071	3.42147e-150
NXPH4	-0.829272	7.46245	1073.14	8.37257e-166
NR2F2	-0.829041	8.40728	1055.62	1.12754e-225
GPATCH2	-0.828917	7.81232	997.608	1.10353e-213
BAZ2B	-0.82811	7.91391	948.943	1.34159e-203
APP	-0.827825	9.13037	1508.15	4.58611001030033e-318
CALM2	-0.827816	10.11	1440.33	2.39876e-304
NID1	-0.825616	7.40964	2057.82	3.46995e-168
SYNGR1	-0.825329	7.61345	811.543	5.38996e-175
LINC01836	-0.823634	7.4042	2403.25	1.70251e-183
ZNF718	-0.823626	7.41673	1850.55	1.00585e-162
EVC2	-0.823491	7.39252	3814.5	6.37447e-221
FAM228B	-0.823076	7.44151	1365.46	6.97361e-152
STRADB	-0.819562	7.52583	969.26	1.54076e-173
SEC14L6	-0.817124	7.42378	1597.02	2.71194e-160
SLC38A1	-0.816532	8.38689	1165.42	2.8223e-248
EDN2	-0.816136	7.41384	1751.03	5.18364e-172
VASN	-0.815589	7.43865	1333.36	4.18284e-154
MLLT3	-0.815503	7.60563	868.682	6.49718e-187
ISYNA1	-0.815267	7.85893	737.926	1.37361e-159
BCAM	-0.813681	7.73639	764.723	3.33643e-165
FGGY	-0.813044	7.63707	809.04	1.79717e-174
TLK1	-0.812731	7.97223	1022.59	7.5087e-219
PCM1	-0.812546	8.1256	966.161	3.60464e-207
NTRK2	-0.812467	7.41195	1619.24	3.13603e-159
SELENOP	-0.812084	8.29597	832.418	2.36269e-179
LINC02298	-0.812075	7.41963	1741.21	6.85683e-167
SPTSSA	-0.810719	8.07475	892.979	5.68536e-192
ZMAT1	-0.808562	7.47163	1036.11	1.17939e-150
HOOK1	-0.807884	7.89827	838.572	1.22853e-180
ASH1L	-0.807026	8.28463	1137.14	1.82048e-242
HIST1H1C	-0.806614	8.4665	704.62	1.33897e-152
ANXA5	-0.806378	8.9038	1285.02	9.26186e-273
LINC01320	-0.805841	7.38944	2714.98	2.32419e-231
TFR2	-0.805062	7.39026	3734.91	1.61784e-221
CBX5	-0.804907	7.95864	971.635	2.64299e-208
MR1	-0.804668	7.47557	1045.81	1.30222e-147
ATP13A3	-0.800643	7.93909	787.634	5.35705e-170
HIF1A	-0.799634	7.94997	839.196	9.10384e-181
NBN	-0.799478	7.7634	853.093	1.15124e-183
GATA2-AS1	-0.799268	7.39339	3243.18	3.58588e-193
PAPLN	-0.798695	7.40947	1975.86	9.12236e-161
STX2	-0.798605	7.52807	886.683	8.93758e-152
SRGAP2B	-0.798007	7.48635	924.755	5.60607e-139
PDE5A	-0.797213	7.45513	1123.39	3.51967e-144
PAXIP1-AS2	-0.797054	7.44794	1194	7.78203e-143
TMPRSS11E	-0.795198	7.39342	2781.5	9.89591e-215
POLK	-0.795028	7.68907	827.785	2.18835e-178
TRPC1	-0.794192	7.40115	2383.76	7.85882e-168
SCRN3	-0.793471	7.55774	845.746	5.36393e-161
CASTOR2	-0.793281	7.39403	3080.71	1.51434e-186
NBPF14	-0.793181	7.57864	855.43	3.75022e-184
CFLAR	-0.792731	8.68476	1076.99	4.39786e-230
C20orf194	-0.792479	7.47875	1013.28	1.30557e-151
ANGEL2	-0.792196	7.58506	834.953	4.27066e-169
PPP1R14C	-0.791694	7.46571	1007.15	3.54471e-145
NRTN	-0.791086	7.4248	1449.21	1.11984e-146
CSF1	-0.790306	7.43814	1163.49	3.81839e-164
GNG11	-0.789458	7.40111	2068.39	4.66934e-167
EPC1	-0.786104	7.94409	967.319	2.07359e-207
EDA	-0.785237	7.40171	2263.93	1.49907e-160
FARP1	-0.784974	8.03086	980.534	3.78638e-210
RPS20	-0.784431	10.0354	1046.69	7.87511e-224
SYNPO	-0.784393	7.52024	855.259	1.3096e-163
AL117335.1	-0.782686	7.40648	2042.73	5.05997e-156
COL4A3	-0.782598	7.39865	2408.94	2.83097e-163
RIDA	-0.782491	7.69099	782.399	6.66624e-169
OSGIN2	-0.779982	7.58372	816.556	4.83778e-176
GUCA2A	-0.779378	7.40599	1608.88	9.97013e-141
HGD	-0.779133	7.64964	780.531	1.63947e-168
WWP1	-0.778571	7.92245	881.275	1.55056e-189
ATOH8	-0.778229	7.38868	3718.84	1.42412e-207
C20orf204	-0.777744	7.44767	1142.32	1.79772e-140
NUPR1	-0.777617	7.85509	412.473	8.83937e-91
C1orf21	-0.777348	7.66135	663.817	5.06688e-144
PXDN	-0.776083	7.49814	781.625	6.95309e-128
ACACB	-0.775755	7.42188	1515.02	4.48468e-144
BOD1L1	-0.775291	8.09811	970.948	3.66852e-208
MMP24	-0.775218	7.39139	3208.2	1.66014e-186
SPART	-0.774963	7.40961	1841.54	2.2188e-157
TRIM52	-0.774285	7.52737	825.818	3.49914e-157
HHEX	-0.773407	7.71057	765.208	2.64123e-165
JUNB	-0.773088	9.68955	752.894	1.00194e-162
TNFRSF11B	-0.769232	7.57925	529.715	1.05652e-115
GOLGA7B	-0.768533	7.44742	1120.48	3.18235e-136
TRIM56	-0.768521	8.09624	801.394	7.11357e-173
TRIM23	-0.767668	7.52766	820.689	1.23686e-142
PRRC2C	-0.76753	8.9441	1409.28	4.75302e-298
CRABP2	-0.767363	7.52013	687.892	3.32306e-142
LMCD1	-0.765023	7.59966	703.701	2.0877e-152
LGALS1	-0.764909	9.72494	498.4	4.62637e-109
KLF15	-0.764908	7.38574	3002.48	4.28852e-223
CHML	-0.764658	7.74696	705.329	9.50213e-153
FOXO6	-0.763627	7.40875	1796.67	3.00846e-147
XRCC5	-0.762514	8.84493	1405.71	2.524e-297
NRBP2	-0.759403	7.56548	751.319	2.14129e-162
NDUFS1	-0.759245	7.97556	873.782	5.63129e-188
KANK1	-0.759197	7.53178	779.808	1.20516e-140
RUSC2	-0.758778	7.42656	1343.76	1.77258e-137
NPR3	-0.758272	7.38993	3020.94	4.36699e-184
TP53BP2	-0.757537	7.64566	721.675	3.51969e-156
2021-03-02	-0.757382	7.63742	770.829	1.75807e-166
BMPR2	-0.756801	7.83203	730.978	3.93424e-158
GABRG3	-0.756041	7.38627	3853.84	3.44127e-205
FAIM	-0.755583	7.82541	755.005	3.6194e-163
SLCO3A1	-0.754436	7.63356	639.025	8.42521e-139
IER2	-0.753965	9.54713	679.11	3.07365e-147
CDR2	-0.75271	7.67443	710.825	6.66418e-154
TANC2	-0.752684	7.54643	745.554	6.98988e-157
SCGB2A1	-0.752589	7.42367	1174.34	3.38007e-129
AC105411.1	-0.752187	7.38316	3112.35	5.6707e-238
ZC3H6	-0.751875	7.59178	715.966	5.55288e-155
MINDY4	-0.751521	7.44533	1104.9	2.95788e-138
APLP1	-0.751343	7.40274	1951.84	4.21037e-150
PRKX	-0.750042	7.56126	728.145	1.21963e-148
PFKFB3	-0.749276	7.86055	638.745	9.64716e-139
COL4A3BP	-0.747814	7.84317	727.977	1.67603e-157
ZNF254	-0.746699	7.51272	793.615	7.61014e-135
HES1	-0.74661	8.78587	529.105	1.42269e-115
KCNQ1	-0.746382	7.48456	872.178	3.60461e-135
ARMCX3	-0.746169	7.92221	831.595	3.50856e-179
CLN8	-0.746161	7.52368	782	5.02367e-148
AEBP1	-0.746081	7.41361	1455.7	5.43586e-126
CNKSR3	-0.745799	7.50818	764.258	9.2645e-138
GALNT11	-0.74491	7.58229	757.27	1.33925e-154
CLTRN	-0.744576	7.4028	1732.67	4.59006e-145
TSPYL5	-0.744535	7.39504	2389.25	1.95487e-154
GALNT18	-0.744519	7.52176	761.875	9.61761e-153
FGD4	-0.744457	8.12216	747.617	1.27779e-161
SULF1	-0.744319	7.38595	3306.35	3.29145e-207
CIR1	-0.74251	8.19922	1052.04	6.17801e-225
POGK	-0.741783	7.70919	752.031	1.51913e-162
LINC00707	-0.741423	7.38442	2808.66	5.98596e-209
IQCA1	-0.741292	7.39005	2864.12	2.07731e-173
RBP5	-0.740962	7.3839	3673.43	5.38225e-215
SLC28A1	-0.740019	7.38524	2909.12	1.33502e-201
SLC1A7	-0.739348	7.38937	2702.69	2.59297e-180
NR1H4	-0.738534	7.50682	758.832	1.15245e-162
MSN	-0.736281	7.75628	648.641	7.94018e-141
LYPD6B	-0.736118	7.86758	519.946	1.24312e-113
AC087477.2	-0.735603	7.39824	2121.68	2.04153e-150
CTSO	-0.735065	7.46283	927.711	5.47455e-129
FOS	-0.734915	10.8652	525.636	7.73229e-115
ZNF37A	-0.734668	7.65265	680.802	1.35486e-147
APH1B	-0.734651	7.5178	788.74	1.16119e-151
ZNF680	-0.733633	7.54112	734.582	1.5089e-133
UBASH3B	-0.732796	7.53179	698.151	2.50952e-129
CKB	-0.732062	8.23981	619.896	9.08544e-135
SLC4A4	-0.731851	7.85238	530.053	8.957e-116
RAB29	-0.731025	7.51252	778.824	5.93519e-139
ZNF844	-0.729627	7.45923	895.041	3.67936e-118
BDP1	-0.729557	7.96338	796.385	7.9268e-172
RHEX	-0.729468	7.40569	1541.51	1.76942e-148
VPS41	-0.729326	7.83139	740.187	4.6101e-160
PIGC	-0.728855	7.71036	771.005	1.61508e-166
CTSL	-0.728111	7.83066	689.902	1.65479e-149
FLNA	-0.727257	8.25042	580.026	2.37916e-126
CYP20A1	-0.726909	7.65547	709.702	1.14677e-153
DMTN	-0.725064	7.61677	688.648	3.03603e-149
RTN4	-0.724745	8.89866	1238.34	3.20645e-263
KMT2C	-0.723245	7.90306	734.38	7.60767e-159
MIDN	-0.723079	8.13456	765.022	2.88818e-165
HSPA12A	-0.721167	7.47297	826.483	2.11608e-114
ZNF736	-0.721038	7.43433	1095.67	9.00808e-117
ANGPTL3	-0.720337	7.38455	2313.36	5.25696e-188
OLFM2	-0.720305	7.43872	997.45	1.79886e-143
ADARB2	-0.719821	7.38365	3944.31	1.84614e-195
IDS	-0.719474	7.96762	747.521	1.33853e-161
AC027644.3	-0.719076	7.61965	695.717	9.92795e-151
RALYL	-0.718734	7.39017	2501.55	1.5296e-166
ZNF469	-0.718524	7.38767	2984.24	7.09019e-168
GATAD2B	-0.717543	7.59859	712.255	3.33782e-154
LINC01558	-0.717233	7.38404	3737.56	1.28173e-186
AC104035.1	-0.716199	7.3834	2918.57	8.37482e-195
COQ10B	-0.716085	7.88092	720.851	5.24024e-156
GIGYF2	-0.71589	7.81951	717.75	2.34481e-155
ISCU	-0.715792	8.33813	969.385	7.7341e-208
CRYZ	-0.715529	7.85866	744.49	5.78e-161
CYP7B1	-0.715032	7.39528	2176.65	8.88389e-148
GATM	-0.714789	7.82998	482.875	9.16165e-106
STK16	-0.714297	7.71234	741.441	2.51724e-160
CPEB2	-0.713896	7.52164	717.778	4.14552e-133
ZNF292	-0.713592	8.11801	705.324	9.52588e-153
KIAA0232	-0.713284	7.70019	679.054	3.15785e-147
LDLRAD4	-0.713102	7.41401	1313.59	1.43176e-116
CBX6	-0.71274	7.56091	673.814	4.20002e-143
GCNT4	-0.712163	7.44459	945.805	2.99848e-114
AC139887.2	-0.711879	7.42395	1193.24	1.1591e-117
NOVA1	-0.71183	7.38801	2804.9	3.38121e-161
IL6R	-0.7108	7.47677	783.226	1.34676e-126
TMEM150C	-0.710113	7.40051	1767.37	1.28995e-131
SPECC1	-0.709551	7.49954	739.829	1.46205e-123
HOGA1	-0.709191	7.38194	3036.18	1.94254e-203
COL4A2	-0.708645	7.49533	683.107	8.40595e-129
PDE4A	-0.707587	7.51734	717.351	1.01204e-126
PPP2R2C	-0.706666	7.39873	1766.79	1.23401e-128
AMOTL2	-0.706616	7.61913	566.953	1.38157e-123
DCAF6	-0.706438	7.86781	743.166	1.0948e-160
SPATA18	-0.706414	7.41307	1328.43	2.07092e-135
DCBLD2	-0.706151	7.66102	456.09	4.53141e-100
RAB32	-0.705578	7.80714	632.49	2.00808e-137
TAGLN	-0.705297	7.6205	343.543	4.71945e-76
PLEKHB1	-0.704689	7.54186	678.66	2.15662e-146
NPTX2	-0.704093	7.38072	3912.57	3.93545e-211
ELFN1	-0.703048	7.38383	3473.21	2.87557e-174
SLC27A3	-0.701933	7.52279	694.398	4.10552e-137
ZNF138	-0.701687	7.53119	681.121	1.777e-117
HDX	-0.7016	7.39085	2429.89	3.28474e-149
PLPP3	-0.70154	7.54849	566.932	1.39559e-123
TMCO1	-0.699931	8.98532	1376.45	2.2068e-291
SLC14A1	-0.699643	7.40274	1382.27	8.38748e-129
ANKRD44	-0.699217	7.43819	986.767	2.86269e-113
PRKAA2	-0.699171	7.55561	623.735	1.40822e-135
SNAP25-AS1	-0.698117	7.38298	3596.7	3.92394e-181
BLOC1S5	-0.697948	7.55439	656.502	3.60299e-128
MIR4435-2HG	-0.696932	7.9905	630.069	6.50376e-137
DANT2	-0.696734	7.40558	1586.84	4.20682e-128
AC100810.1	-0.696492	7.61188	661.558	1.51428e-143
TNFAIP6	-0.693381	7.91198	393.217	1.13471e-86
GOLT1A	-0.692222	7.67779	594.62	1.96334e-129
RASAL2	-0.692164	7.70547	594.53	2.05141e-129
CST6	-0.691057	7.52246	519.23	1.76293e-113
FAM49B	-0.690957	8.03644	776.98	9.07234e-168
POLI	-0.69082	7.43038	1059.88	3.23586e-112
LIPC	-0.690032	7.39268	1960.16	2.8136e-142
AC021146.12	-0.689835	7.39131	2211.65	3.8705e-139
FGL1	-0.689796	7.50018	474.941	4.44599e-104
ZNF75A	-0.689274	7.48477	741.107	2.51354e-109
TOR1AIP1	-0.687903	7.67515	634	9.64713e-138
CNTLN	-0.686622	7.39748	1812.58	2.50209e-129
CNOT4	-0.686413	7.77319	671.921	9.99024e-146
TTN	-0.68636	7.38829	2370.04	1.46815e-153
DACT2	-0.686325	7.38725	2639.38	6.84176e-154
IFIT2	-0.685964	7.79241	375.414	7.20046e-83
HOMER3	-0.685115	7.65624	619.287	1.22076e-134
RBMS3	-0.685078	7.38269	3328.01	1.84533e-172
CDC20B	-0.684932	7.37874	3734.45	8.01313e-216
NFE2L2	-0.684847	8.5182	959.126	1.03594e-205
ABLIM3	-0.684823	7.47126	740.84	1.1999e-109
GABPB1-AS1	-0.683444	7.67729	547.725	1.61842e-119
MTPN	-0.68302	8.27402	832.298	2.50261e-179
NOTCH2NL	-0.682928	7.43739	968.881	1.14282e-110
PJA2	-0.682343	8.03364	757.115	1.30781e-163
AKR1C3	-0.682075	8.8179	646.858	1.88491e-140
ZNF678	-0.68167	7.48893	713.045	9.07322e-110
PPP1R1A	-0.680706	7.39292	1731.81	3.74588e-125
ZBTB43	-0.680691	7.55958	597.631	4.54022e-130
NEFL	-0.679293	7.53699	471.046	1.08375e-85
USP40	-0.679154	7.57993	612.088	2.1344e-131
BTG1	-0.67867	9.82995	947.603	2.54522e-203
PMEPA1	-0.678492	9.40383	608.843	1.95087e-132
UFC1	-0.678336	8.93415	1253.21	2.91087e-266
BAIAP2-DT	-0.677104	7.47574	753.546	1.72817e-111
LINC00842	-0.676813	7.45192	760.601	1.81573e-97
WDR41	-0.676674	7.55268	643.27	8.15107e-120
PLD1	-0.675932	7.60221	558.886	7.02848e-122
LGR5	-0.67573	7.49427	508.964	6.09342e-103
ODR4	-0.674898	7.74227	648.281	9.45103e-141
PLEKHG4B	-0.674856	7.39812	1652.61	6.42825e-117
AC092683.1	-0.674373	7.45818	797.233	2.87801e-113
CLDN1	-0.672864	8.68873	550.761	3.68376e-120
CDC73	-0.672304	7.84048	688.279	3.62957e-149
AC026462.3	-0.672219	7.40107	1523.86	1.4293e-134
AJAP1	-0.671907	7.38095	3584.84	2.70272e-173
VAMP2	-0.67182	7.90932	708.58	1.9727e-153
SLC43A3	-0.671375	7.46869	738.55	3.24325e-114
LINC01436	-0.669823	7.39517	1595.87	8.61919e-125
ARNT2	-0.66979	7.40885	1327.56	3.99161e-115
UBE2Q2	-0.669706	7.62261	594.949	1.67271e-129
TCEAL4	-0.669685	8.2241	837.963	1.64563e-180
CHST15	-0.668891	7.39745	1687.71	9.87439e-121
ETAA1	-0.668395	7.52841	646.073	1.77304e-117
TRAK2	-0.667488	7.54714	626.172	3.33588e-124
ENPP5	-0.667398	7.42014	1110.79	2.70653e-115
RHOU	-0.666326	7.86476	532.338	2.93735e-116
APOM	-0.665878	7.49666	590.616	1.59334e-113
AL137145.2	-0.665567	7.40285	1480.06	1.25522e-113
DPP10-AS1	-0.665451	7.38252	2976.99	5.44373e-166
TMEM161B-AS1	-0.665371	7.51196	646.166	1.67249e-107
C4BPA	-0.665332	7.38203	2803.42	1.92328e-167
FAM19A5	-0.665329	7.38044	3621.43	1.5174e-170
AC004540.1	-0.665098	7.39001	2152.81	1.1691e-131
TTC30A	-0.664804	7.4418	860.893	2.63247e-99
TTPA	-0.664719	7.38143	3044.38	2.38744e-168
TEAD1	-0.664273	7.67864	570.904	2.01695e-124
DZIP1	-0.663986	7.37938	3750.91	2.58515e-181
ANKAR	-0.663967	7.45033	817.792	5.15805e-102
SMYD3	-0.661804	7.56505	601.024	8.72308e-131
ST6GAL2	-0.661696	7.37997	3742.45	1.12342e-171
TLR5	-0.660443	7.42571	991.097	3.89956e-114
ZNF429	-0.660401	7.41843	1122.7	5.33846e-106
GUCY1A1	-0.660341	7.39248	1877.94	5.02572e-132
CNTNAP2	-0.659282	7.37868	3654.26	6.78452e-186
MBD2	-0.659005	7.75062	605.85	8.35614e-132
LINC01106	-0.658688	7.42374	992.197	7.7718e-100
CCDC125	-0.658418	7.50337	636.226	8.65238e-101
KLHL29	-0.658328	7.39235	1920.42	2.77304e-126
TCAF1	-0.658156	7.79467	574.82	2.99852e-125
AC004264.1	-0.658064	7.39919	1374.04	3.53804e-117
ACSL4	-0.65663	7.62211	474.781	4.80661e-104
KLF6	-0.655369	9.97472	738.905	8.56116e-160
CUX1	-0.654548	7.99825	637.028	2.22015e-138
CNPPD1	-0.654167	7.66431	593.251	3.82051e-129
SNX27	-0.653911	7.71183	602.649	3.959e-131
LINC01615	-0.653895	7.38384	2656.03	1.21102e-139
RBM43	-0.652583	7.53074	595.326	2.51466e-111
AC106869.1	-0.651935	7.42874	938.985	1.77674e-98
TTC30B	-0.651119	7.44553	813.537	8.76338e-98
TP53INP2	-0.650998	7.44788	776.211	4.38513e-104
GPR155	-0.650956	7.45709	683.542	2.27462e-88
FMO5	-0.649754	7.65282	411.522	1.41033e-90
DSP	-0.649343	8.88002	770.947	1.66111e-166
SPATA6L	-0.647657	7.47011	686.915	4.67095e-96
AL162231.1	-0.647573	7.4436	809.904	8.86947e-98
TRIM4	-0.647545	7.61045	556.989	1.77095e-121
DYNC1I2	-0.647392	8.59988	1065.02	1.29549e-227
NRXN3	-0.647013	7.37995	3290.34	4.24437e-160
STOM	-0.646879	8.0076	528.269	2.13949e-115
MAGEH1	-0.646762	7.40998	1196.53	1.19476e-107
CEP350	-0.645958	7.99093	592.64	5.14315e-129
HLF	-0.64531	7.38396	2577.23	6.48661e-141
GRB14	-0.644862	7.51048	592.466	3.22359e-111
MACF1	-0.644834	8.20528	650.97	2.56547e-141
MEG8	-0.64472	7.3793	3435.7	1.93805e-162
FBLN1	-0.644016	7.51251	452.799	2.27195e-99
GABPB2	-0.642942	7.4909	635.384	1.49554e-99
SULT1A2	-0.642446	7.40723	1289.2	5.37829e-114
LIPA	-0.64238	7.56963	572.933	7.51292e-125
OAZ3	-0.642224	7.4065	1270.14	7.38179e-107
C1RL	-0.642057	7.60057	549.061	8.43783e-120
PCNX4	-0.642049	7.65807	528.199	2.21336e-115
ATF6	-0.642032	7.82382	608.765	2.0265e-132
LRRC49	-0.641244	7.41422	1078.11	1.69762e-98
C8A	-0.640482	7.37767	3828.42	5.59808e-177
CAV2	-0.640363	8.6261	734.656	6.66051e-159
SBDS	-0.639242	8.58662	822.873	2.32068e-177
COX20	-0.639119	8.74261	997.26	1.30273e-213
FZD8	-0.638079	7.39615	1473.45	5.85745e-103
AC020659.1	-0.637923	7.39073	1947.59	1.30078e-123
NPW	-0.63753	7.71385	286.394	8.49152e-64
SDCCAG8	-0.637523	8.21102	551.925	2.08891e-120
FGF13	-0.637347	7.37994	3073.91	3.89492e-157
PON3	-0.637068	7.55466	495.161	2.25414e-108
CHST3	-0.636986	7.44372	722.45	2.06342e-85
WIPF1	-0.63632	7.47423	622.839	2.10795e-89
KLHDC9	-0.635827	7.49208	603.857	2.41622e-92
ATP1A1	-0.635135	9.63377	806.604	5.79958e-174
DENND4A	-0.634857	7.54337	567.392	3.61603e-112
OTUD6B-AS1	-0.634828	8.07166	703.695	2.09424e-152
TNFAIP2	-0.634561	8.07281	418.825	3.90879e-92
DSCAML1	-0.634477	7.39048	1833.7	1.59605e-111
MN1	-0.634285	7.38855	1946.6	9.25825e-119
LCA5	-0.633286	7.46686	638.898	9.06501e-91
GLIS2	-0.63327	7.42627	901.436	9.04639e-96
SOD2	-0.632926	8.50565	393.878	8.2016e-87
NIFK-AS1	-0.632848	7.46219	698.438	9.3733e-94
ZBTB37	-0.632362	7.48479	617.355	1.90122e-97
BMP6	-0.632126	7.3851	2257.01	4.66188e-123
SOCS2	-0.6319	7.43524	779.131	3.05282e-96
AL022068.1	-0.631581	7.38092	2862.44	1.87147e-137
RCOR3	-0.631095	7.73295	559.439	5.36886e-122
FJX1	-0.630333	7.39553	1482.44	5.01206e-115
SLC5A9	-0.630277	7.38775	2148.08	7.88816e-127
ICE1	-0.630079	7.63369	534.349	1.10149e-116
AC108134.2	-0.630036	7.42884	770.07	1.00335e-88
BST1	-0.629633	7.43357	767.572	6.67524e-83
UNC13D	-0.629629	7.55393	521.957	3.71807e-113
GORAB	-0.629507	7.51777	584.373	6.37543e-108
ZNF888	-0.629487	7.41689	1014.75	1.57288e-96
C1QTNF1-AS1	-0.629062	7.37741	2798.77	3.85353e-166
RUFY1	-0.628245	7.65087	546.631	2.75929e-119
AL121944.1	-0.628212	7.53397	525.396	6.71678e-114
PRKAB2	-0.627949	7.56893	522.458	3.6467e-114
PDLIM7	-0.627753	7.73662	470.55	3.81173e-103
RGS14	-0.627745	7.65451	522.341	3.86086e-114
AL137145.1	-0.627481	7.3921	1721.31	7.88752e-111
KIAA0040	-0.627163	7.57255	534.104	1.2413e-116
DSE	-0.626996	7.42255	905.014	1.95355e-92
RAD50	-0.626954	7.4553	711.263	1.75774e-90
NREP	-0.626697	7.50427	564.714	3.06145e-95
NBPF12	-0.626374	7.48034	636.203	9.62158e-101
PER1	-0.624946	7.62401	512.57	4.5563e-112
ZMYM4	-0.624763	7.75272	503.588	3.66611e-110
RIMS2	-0.624524	7.38079	2749.37	3.72842e-140
ICA1L	-0.62433	7.41495	981.466	1.43951e-88
STK33	-0.623504	7.41409	996.852	4.66325e-91
SLC17A3	-0.623462	7.37649	2815.39	1.49901e-170
NEXN	-0.623385	7.40198	1176.8	9.53356e-95
KLHDC10	-0.623245	7.66208	520.145	1.12794e-113
ANKRD2	-0.622272	7.3777	3142.9	3.18176e-164
LINC00862	-0.62154	7.37951	2919.16	4.0465e-144
N4BP2L1	-0.621126	7.46194	668.907	1.33577e-90
ZKSCAN1	-0.620754	8.11915	596.784	6.85329e-130
LETM2	-0.620655	7.45057	675.898	2.50964e-89
FTCD	-0.620514	7.38958	1731.13	7.73769e-120
FOXC1	-0.619714	7.68095	397.97	1.09768e-87
LINC01006	-0.619438	7.48226	618.191	6.35368e-93
AC087482.1	-0.619395	7.40021	1252.46	3.38789e-100
MYLIP	-0.619114	7.56834	488.977	1.0961e-105
NPM2	-0.618513	7.44328	739.524	1.84791e-90
RAB3GAP2	-0.618444	7.7169	526.584	4.86788e-115
MFF	-0.618385	8.0309	709.214	1.45173e-153
TRMT1L	-0.616603	7.53639	538.971	4.12755e-103
PEBP1	-0.616421	9.44124	779.502	2.69134e-168
ERO1B	-0.615936	7.44568	701.913	1.7816e-86
CYP2C9	-0.615809	7.42145	841.413	1.005e-109
DUSP10	-0.615616	7.66423	424.109	2.92256e-93
PNPLA3	-0.614965	7.42971	739.753	1.84159e-101
SMAD4	-0.614806	7.58867	517.346	1.69826e-108
SEC14L4	-0.614773	7.38868	1876.13	2.38397e-117
ITIH4	-0.614395	7.37982	2704.87	8.09805e-149
TFEB	-0.614022	7.46081	661.879	3.38978e-90
ELAC1	-0.613939	7.42971	835.036	1.47841e-90
KCTD7	-0.613666	7.42464	857.715	5.87913e-88
EGR2	-0.61312	7.44332	647.47	3.11313e-85
AL121899.1	-0.612907	7.3847	2142.29	1.19404e-128
FOLR1	-0.612034	7.44443	624.096	9.42166e-86
CTGF	-0.61201	7.98223	298.373	2.27343e-66
IL1RAP	-0.611703	7.50864	518.577	1.25479e-103
HGSNAT	-0.611686	7.65124	503.566	3.70675e-110
KLK5	-0.611118	7.4142	793.321	4.70582e-88
2021-09-06	-0.610878	7.49343	546.616	8.36005e-102
LINC02532	-0.610811	7.53806	481.034	2.25517e-105
KNDC1	-0.609255	7.38696	1897.52	4.44452e-116
PCDHGA6	-0.608457	7.39207	1607.47	1.286e-103
AR	-0.608093	7.39429	1346.23	7.79136e-92
MRPS30-DT	-0.607116	7.41367	957.871	2.77556e-85
VPS54	-0.606869	7.59426	478.115	9.40287e-105
ALKAL1	-0.605906	7.41413	959.622	8.53341e-108
ZC3H12A	-0.604194	7.78236	416.752	1.0813e-91
UGP2	-0.603889	8.18033	598.007	3.78226e-130
KRT86	-0.60382	7.41211	765.118	1.62603e-80
EPHX2	-0.60377	7.47777	587.376	6.16674e-89
BAZ1B	-0.603673	7.94997	526.456	5.18288e-115
ZNF595	-0.60352	7.42176	894.16	7.70091e-90
MKL2	-0.603161	7.58436	465.157	8.1291e-99
AC068888.1	-0.601668	7.48935	571.176	1.05749e-93
RNASEK	-0.60162	7.50357	515.843	5.13658e-103
LPCAT1	-0.600157	7.55605	462.765	6.71299e-92
ZNF721	-0.599582	7.65955	498.602	4.19123e-109
UBXN8	-0.59927	7.47785	586.221	3.7524e-85
CXCL1	-0.599004	8.49544	229.78	1.29361e-51
CDK19	-0.598814	7.60288	476.196	2.40564e-104
CMTM3	-0.598765	7.67965	393.449	1.01272e-86
NEDD4	-0.598226	7.4754	581.512	1.64429e-87
FBXL5	-0.59815	7.66219	488.662	5.40668e-107
ZNF684	-0.597938	7.40492	1115.01	2.90726e-95
PRKDC	-0.597541	8.12725	559.287	5.7812e-122
NUDT3	-0.597351	7.6255	469.884	5.28279e-103
MCFD2	-0.594892	7.8558	540.801	4.7332e-118
AC245041.2	-0.594042	7.64283	407.818	8.69603e-90
BCL9	-0.593666	7.46231	603.842	6.39207e-81
ZHX2	-0.593385	7.46863	597.806	1.32921e-84
RTN4RL2	-0.59329	7.38984	1581.49	5.15978e-106
STARD13	-0.59308	7.39241	1440.3	6.07066e-98
TRPM8	-0.592932	7.37741	2875.5	4.34203e-137
IGFN1	-0.592564	7.37686	2776.67	5.09804e-138
KCND3	-0.591635	7.37456	2791.04	3.52657e-161
SLC35F3	-0.591132	7.40349	1120.89	3.11387e-92
ZNF677	-0.591076	7.38014	2286.88	7.16341e-144
SMARCC2	-0.590906	7.71587	492.137	9.88389e-108
OGDHL	-0.59058	7.37562	3274.83	1.17521e-152
PIGM	-0.5904	7.54899	497.874	1.00867e-100
MYL9	-0.589871	7.78419	343.367	5.14778e-76
PNRC1	-0.589601	8.57992	667.469	8.63378e-145
ERP27	-0.589249	7.38786	1534.15	1.12359e-104
FAM110B	-0.588083	7.37597	3155.86	1.18372e-146
CNTN4	-0.587767	7.37597	3336.67	7.49392e-139
PRKAG2-AS1	-0.587639	7.38701	1733.31	3.53221e-101
CREBRF	-0.586827	7.90195	469.474	6.45547e-103
BX322562.1	-0.5866	7.37729	2952.68	6.47067e-134
DYRK3	-0.586119	7.40092	1141.93	3.33453e-88
HRK	-0.586107	7.37926	2426.53	6.53024e-122
ITGAV	-0.585966	8.08309	469.234	7.26134e-103
ZNF570	-0.585575	7.39075	1521.01	1.60914e-101
ZNF431	-0.585491	7.51284	492.711	1.00962e-84
FUS	-0.585409	8.6657	704.094	1.72672e-152
ZNF669	-0.585378	7.45466	605.081	6.71379e-78
RPRD1A	-0.585295	7.68109	465.885	3.74108e-102
MMP25-AS1	-0.585282	7.43648	688.666	8.31024e-78
AF117829.1	-0.584745	7.45593	605.232	2.1474e-81
MBD5	-0.584628	7.61336	459	1.08935e-100
AL365181.2	-0.583963	7.3906	1518.83	2.04145e-99
NXN	-0.583705	7.4273	721.48	3.01797e-84
PCDHGA5	-0.582331	7.37925	2508.3	1.93656e-118
HABP4	-0.58079	7.48095	521.961	1.8303e-75
FBXO21	-0.580449	7.78305	477.537	1.2482e-104
SSBP2	-0.580094	7.52216	456.005	4.67236e-77
MYH10	-0.579947	7.41581	826.401	1.22566e-76
FHOD3	-0.579935	7.3834	1928.46	1.80346e-105
PLA2G4C	-0.579886	7.39444	1346.29	8.10436e-98
PAFAH1B1	-0.579017	7.89813	548.084	1.35842e-119
LRRFIP1	-0.578779	8.73242	643.887	7.96381e-140
CDK13	-0.577777	7.90489	480.432	3.02756e-105
ZNF302	-0.577602	7.52795	483.473	3.05662e-93
PDE6B	-0.577351	7.39421	1308.88	3.89384e-90
SLC46A1	-0.576959	7.39776	1223.01	2.58155e-94
RANBP6	-0.576668	7.48954	514.489	4.468e-80
AKAP9	-0.575606	8.68592	734.507	7.1574e-159
HIST1H2BD	-0.57512	7.5557	412.446	1.43126e-87
PPFIBP1	-0.57495	7.95937	468.326	1.13262e-102
CWF19L2	-0.574874	7.67258	440.639	8.8031e-97
ERV3-1	-0.574639	7.52706	450.951	4.66385e-83
DUSP16	-0.574301	7.52834	470.529	2.39565e-92
INTS6	-0.573591	7.7864	402.215	1.36305e-88
ADAMTS16	-0.57295	7.37445	2548.85	1.28531e-142
AFG3L2	-0.572694	7.78998	475.586	3.2413e-104
RHOJ	-0.572624	7.37393	3696.91	4.36275e-146
LINC01116	-0.572326	7.41448	837.261	6.11587e-79
CLCN5	-0.572124	7.44385	597.176	2.01051e-72
CCT3	-0.572031	8.67603	645.059	4.51075e-140
TNKS	-0.571511	7.54958	453.453	2.47137e-86
ZNF605	-0.57142	7.47411	520.586	4.83612e-77
CIRBP	-0.571408	8.71917	760.039	3.1932e-164
TNC	-0.570385	7.41533	653.679	1.98484e-84
AC124312.1	-0.569688	7.40748	1001.13	1.9437e-88
TTBK2	-0.569218	7.45079	589.534	8.78514e-76
GCLM	-0.568547	7.66869	409.154	4.5117e-90
TBC1D1	-0.568497	7.51681	464.468	6.85867e-83
ARRDC2	-0.568122	7.83335	397.975	1.09484e-87
AC112229.3	-0.568036	7.37289	2867.86	9.0729e-157
ATF7	-0.567502	7.73893	475.877	2.81171e-104
OLFML3	-0.567074	7.37782	2462.28	6.25063e-118
PTPRG	-0.56657	7.44873	582.968	2.34685e-76
CHD6	-0.566315	7.63142	442.503	3.53119e-97
ZNF675	-0.565743	7.4363	656.204	5.64895e-75
CCNL1	-0.565304	8.56714	501.525	1.0047e-109
TNFRSF10C	-0.565233	7.38248	1920.34	1.43261e-102
VAT1L	-0.564937	7.37234	3863.03	9.51473e-162
STAU2	-0.564741	7.62567	437.849	3.45696e-96
CHD7	-0.563906	7.67135	432.459	4.86058e-95
TATDN3	-0.563822	7.50977	492.009	4.39934e-86
FIGN	-0.56375	7.3775	2485.09	8.6606e-127
PRRX1	-0.562855	7.39139	1234.34	2.16434e-88
POGZ	-0.562737	7.82175	458.355	1.49454e-100
WIPI1	-0.562233	7.4859	503.589	4.78006e-95
ERC1	-0.561409	7.55752	436.25	2.78589e-86
PCDHGB7	-0.561338	7.37623	2751.92	9.40893e-119
SRPK2	-0.561181	7.77108	454.928	8.00867e-100
BATF3	-0.561165	7.38286	1808.43	1.65055e-99
FMO4	-0.56047	7.39042	1422.01	5.29177e-93
EFCAB2	-0.560093	7.58224	417.302	4.39705e-88
AC009414.2	-0.559669	7.47708	479.402	1.02176e-84
SPRY4	-0.559528	7.47538	481.713	3.04733e-72
ASXL1	-0.559187	7.76067	466.051	3.44821e-102
SVIL	-0.558741	7.85094	428.304	3.73166e-94
PBXIP1	-0.558636	7.69191	415.299	2.20722e-91
CNFN	-0.558156	7.51765	419.004	3.38238e-81
OSGEPL1	-0.55813	7.44692	585.964	2.12908e-70
GPATCH4	-0.55674	7.7313	424.393	2.5427e-93
TTC39C	-0.555761	7.58683	400.89	2.61319e-88
SP3	-0.555591	7.87799	464.291	8.16399e-102
ETV1	-0.555151	7.43821	591.537	4.04889e-77
ADAMTS9-AS2	-0.555092	7.40128	1028.6	4.78797e-80
PREPL	-0.55489	7.73303	422.134	7.70554e-93
CHIC1	-0.554845	7.41608	786.68	1.49618e-74
MICU3	-0.554801	7.3755	2808.34	9.07539e-124
ANO6	-0.55358	7.82671	435.169	1.28692e-95
SRCIN1	-0.553523	7.42316	745.816	1.45264e-81
NTS	-0.553476	7.61985	198.946	5.843e-45
EVA1B	-0.553057	7.68607	403.513	7.20435e-89
DDIT3	-0.553002	8.30726	339.824	2.95228e-75
CTTNBP2NL	-0.552984	7.72733	421.82	8.98872e-93
NSL1	-0.552741	7.70856	447.531	3.00327e-98
HEBP1	-0.552609	7.98348	456.287	4.11426e-100
MRC2	-0.552006	7.39862	989.641	8.59128e-77
CCDC198	-0.551706	7.59041	384.25	9.32686e-85
TNRC6A	-0.551654	7.77566	443.892	1.78744e-97
LIMS2	-0.551072	7.37673	2466.74	7.88207e-111
SLC23A2	-0.550808	7.43573	621.265	9.42569e-71
NFIA	-0.550801	7.64107	351.067	1.15785e-77
PCDHB9	-0.550249	7.3855	1541.01	4.85912e-90
AC242426.2	-0.54989	7.40498	942.92	1.23851e-80
EIF3J-DT	-0.549649	7.59686	411.324	1.55422e-90
HEG1	-0.549228	7.39017	1277.19	2.48126e-86
SCN9A	-0.54865	7.43954	553.693	1.89133e-77
SEL1L3	-0.548627	7.90572	415.618	1.88741e-91
RDH12	-0.548059	7.38397	1649.35	2.12791e-111
CAB39L	-0.547035	7.42747	656.453	6.37509e-69
STAT1	-0.546674	8.27568	363.059	3.15079e-80
CCDC30	-0.54621	7.43201	621.708	5.60366e-71
CCDC74B	-0.545941	7.40507	861.067	1.62373e-70
HAGHL	-0.545014	7.54031	413.923	8.97348e-89
PITRM1	-0.54473	7.6565	388.881	9.56604e-86
DECR1	-0.544002	8.05176	477.986	1.00173e-104
MEX3C	-0.543996	7.5237	421.818	1.02054e-74
CSAD	-0.543928	7.53324	413.92	6.48046e-82
LEPROT	-0.543618	8.20374	525.082	1.01314e-114
MTMR9	-0.543409	7.48446	461.174	9.29116e-72
EIF5	-0.543359	8.52906	581.898	9.5665e-127
BAALC	-0.542995	7.37063	3644.65	4.39514e-163
IPO9	-0.542786	7.6302	396.26	2.54259e-87
PEA15	-0.542168	7.63169	392.95	1.29366e-86
ST3GAL1	-0.541609	7.45874	496.283	2.19227e-70
TRIM47	-0.541143	7.91684	423.858	3.30666e-93
MUM1	-0.539989	7.73455	407.029	1.28086e-89
PPP2CB	-0.5395	7.93673	438.822	2.1463e-96
RBM12B	-0.53839	7.59494	387.776	1.64633e-85
TMEM99	-0.53758	7.72466	409.277	4.24607e-90
AC145124.1	-0.537575	7.39291	1144.69	6.96051e-77
MYL5	-0.537376	7.45909	508.592	5.18409e-70
QKI	-0.537122	7.7997	384.274	9.21614e-85
ZNF331	-0.537053	7.443	520.566	1.15473e-71
ZFP36	-0.536869	9.33506	382.284	2.45191e-84
TUBA4A	-0.53651	8.00626	362.623	3.90412e-80
SLFN12	-0.536018	7.4205	680.034	4.2091e-70
ZNF124	-0.535729	7.49078	442.158	9.62279e-71
MAGI2	-0.535728	7.40887	821.752	2.37629e-71
ZNF441	-0.535533	7.39996	941.457	5.70021e-71
ACSM1	-0.535523	7.37629	2335.24	1.09324e-105
EXOC6B	-0.535186	7.47051	482.281	8.07492e-71
TBC1D2B	-0.534925	7.53076	424.464	1.08555e-90
FAM133B	-0.534792	8.24905	538.932	1.17802e-117
ZNF165	-0.534279	7.45173	484.036	1.29933e-72
DUSP23	-0.53404	8.44912	539.299	9.84958e-118
MMD	-0.533407	7.5262	378.948	1.2655e-83
LINC01588	-0.533389	7.41179	746.174	1.2884e-67
CRYM	-0.533341	7.44769	516.603	2.91263e-70
IFT80	-0.533259	7.52677	400.515	4.33306e-74
KDM5B	-0.533018	7.75754	397.752	1.22148e-87
GAS7	-0.532217	7.37688	2192.31	1.85432e-102
RNF170	-0.531551	7.61463	394.812	5.18086e-87
EDA2R	-0.53155	7.37634	2312.13	8.90439e-106
SOGA1	-0.531444	7.44288	531.56	6.31691e-64
CHD4	-0.531389	7.95542	431.139	9.28991e-95
ADAMTS12	-0.531223	7.37324	2753.04	7.37517e-116
OSCP1	-0.531005	7.48767	432.278	3.15419e-83
GSR	-0.530231	7.71783	387.504	1.88199e-85
AC020916.1	-0.529887	7.70868	299.701	1.17928e-66
CORO2B	-0.529724	7.37189	3377.74	1.48582e-128
BCL2L1	-0.529645	8.30768	438.872	2.09389e-96
EPC2	-0.52946	7.51049	416.691	4.39625e-69
PRNP	-0.529256	7.69035	360.449	1.13899e-79
DIXDC1	-0.529077	7.48891	413.079	1.01512e-63
NRG3	-0.528917	7.38121	1777.46	3.991e-95
HEY1	-0.528624	7.39222	1107.11	6.02482e-78
PACS1	-0.528182	7.62905	374.755	9.95859e-83
CCL28	-0.527677	7.52476	315.746	6.3033e-67
AGFG1	-0.527134	7.8883	422.276	7.18804e-93
AC016831.5	-0.526575	7.48318	424.489	7.31023e-72
NUDT7	-0.525788	7.44107	548.358	1.5589e-65
ZNF701	-0.525568	7.43344	590.026	2.05293e-68
SLX4IP	-0.525536	7.5005	413.867	7.78541e-68
DIO3OS	-0.524772	7.38541	1272.03	1.62897e-78
TUT4	-0.524075	7.8327	367.755	3.12081e-81
EMC2	-0.523904	7.89141	440.013	1.1968e-96
METTL18	-0.523787	7.47757	455.915	4.5377e-68
TFAP2C	-0.523682	7.42954	526.629	9.95579e-56
AC111000.4	-0.52339	7.39132	1131.61	1.55017e-78
ZNF181	-0.523131	7.42449	636.985	2.33749e-67
ZNF611	-0.523069	7.40243	883.343	1.11905e-71
HIVEP1	-0.522998	7.52098	385.717	9.95145e-72
DIS3L2	-0.522732	7.55816	386.749	2.60035e-74
RASEF	-0.522521	7.65709	355.45	1.33604e-78
ATP6V1E2	-0.52241	7.42794	610.997	5.92603e-68
AC083843.3	-0.522402	7.42653	602.866	2.02937e-65
SERPINF1	-0.521561	7.39449	919.198	1.16812e-79
KDSR	-0.521477	7.88019	406.146	1.97634e-89
SPTBN5	-0.521334	7.38411	1486.14	3.10935e-87
TMEM65	-0.521278	7.61295	370.858	6.77577e-82
FHL3	-0.521089	7.55946	348.453	4.19711e-77
RBKS	-0.520643	7.48181	443.199	2.88358e-74
TBC1D9	-0.520535	7.46159	477.968	1.30485e-69
SPOCK1	-0.520527	7.40335	704.115	8.68387e-68
PECR	-0.519359	7.63356	364.93	1.25401e-80
AZIN1-AS1	-0.519326	7.44602	512.536	3.92978e-68
KMT2E	-0.518019	8.33074	531.945	3.55876e-116
TPST2	-0.517979	7.54455	364.221	1.77817e-80
ACBD6	-0.517889	7.76719	412.648	8.11195e-91
NFIL3	-0.517613	7.70634	338.285	6.30657e-75
KLHL42	-0.517108	7.64504	350.161	1.8094e-77
ITGBL1	-0.516641	7.37789	1781.9	1.20212e-93
MRNIP	-0.516101	7.51149	403.813	8.27965e-71
ZNF791	-0.515924	7.63128	365.772	8.2861e-81
IER3	-0.515465	9.54759	289.911	1.49096e-64
DDX59	-0.515399	7.51137	395.197	2.01177e-67
ZBTB41	-0.5153	7.65268	358.807	2.55642e-79
ZNF439	-0.515153	7.37922	1794.33	1.74245e-95
LINC00909	-0.515097	7.47809	426.642	3.06535e-63
CDH4	-0.514629	7.37016	2627.71	7.45999e-131
CTBP1-DT	-0.51441	7.45079	494.596	1.33117e-64
SOX11	-0.513635	7.3703	2600.91	4.26691e-128
NNT-AS1	-0.513155	7.58421	351.929	7.5696e-78
RNF180	-0.512709	7.37353	2491.04	3.1044e-103
HIST1H2AC	-0.512691	8.11698	328.227	8.99882e-73
FBXO28	-0.512378	7.60293	364.461	1.4192e-77
SMAD5	-0.512321	8.04514	421.896	8.65827e-93
ARHGEF5	-0.512306	7.69012	353.161	4.1261e-78
ZNF322	-0.511273	7.5967	369.092	1.61659e-81
NR2F2-AS1	-0.51027	7.4014	845.805	8.76443e-67
NRSN2	-0.509999	7.42465	573.97	2.11516e-58
HNRNPU	-0.509946	9.19443	643.19	1.11685e-139
TMEM64	-0.509746	7.4612	439.347	1.19864e-57
NPTXR	-0.509229	7.3754	2072.69	1.07175e-94
RECK	-0.509068	7.40073	808.576	1.067e-64
RNPC3	-0.508949	7.55496	340.244	2.40027e-75
PIK3R1	-0.50884	7.74749	327.66	1.19053e-72
UBAP2L	-0.508805	7.75377	377.902	2.11656e-83
AGO3	-0.508759	7.62051	357.305	5.35764e-79
FBLN7	-0.508716	7.3762	2023.6	1.05925e-94
ZNF33B	-0.508664	7.72064	340.932	1.71023e-75
GATAD1	-0.508145	8.07953	393.048	1.23324e-86
PCDHGA8	-0.50804	7.37023	3416.92	4.37926e-123
ZNF608	-0.507883	7.51162	372.912	3.26777e-77
ERICH1	-0.507173	7.7595	372.149	3.5899e-82
ADAL	-0.506698	7.42909	557.491	3.27742e-63
ZNF107	-0.506492	7.45048	461.216	4.1549e-59
MRAS	-0.506028	7.38254	1357.05	7.89557e-77
AC013652.1	-0.505553	7.3741	2254.54	4.5923e-101
IDNK	-0.505386	7.43805	523.915	6.0529e-64
CCDC7	-0.504533	7.41713	635.26	2.83698e-61
NCDN	-0.504153	7.44273	506.187	6.64313e-72
TYRO3	-0.503399	7.40662	719.449	1.79676e-60
ADCY1	-0.503316	7.37022	3158.37	1.69012e-121
AC058791.1	-0.503244	7.52301	340.499	9.02578e-68
PIKFYVE	-0.50316	7.52435	365.412	7.36606e-67
PHF20L1	-0.502842	7.80655	370.977	6.39036e-82
SPAG7	-0.502592	7.91934	419.061	3.48106e-92
ZMAT3	-0.502174	7.60642	326.262	2.37317e-72
KIF13B	-0.502088	7.8449	342.559	7.66662e-76
TGS1	-0.502082	7.66955	347.103	8.16484e-77
ATF7IP	-0.501871	7.75437	338.33	6.16673e-75
HKDC1	-0.501748	7.66685	314.133	9.44803e-70
SLC2A2	-0.501656	7.3826	1310.01	1.42619e-79
GPX3	-0.501635	7.41194	631.583	1.84272e-59
TGM2	-0.501494	7.76451	225.827	9.20833e-51
B3GALT2	-0.501467	7.37751	1730.92	1.23718e-97
AL445524.1	-0.500688	7.59704	321.801	2.1444e-71
GLUL	-0.500579	8.13512	311.08	4.26668e-69
GNL2	-0.500543	7.65559	332.577	1.05244e-73
NCKAP5	-0.500373	7.36981	3370.65	3.52614e-120
CLCF1	-0.499592	7.4848	380.194	3.94593e-63
ZNF667-AS1	-0.499503	7.36879	3573.45	1.70295e-142
TLE1	-0.498225	7.75431	353.139	4.17099e-78
FBN1	-0.497985	7.38195	1275.63	1.23421e-76
GUCY1B1	-0.497842	7.37722	1775.99	8.26739e-90
MYO3A	-0.497549	7.38198	1435.85	1.07979e-82
EGFR	-0.497433	7.85105	337.234	1.05897e-74
LINC00665	-0.497183	7.45298	434.711	3.29641e-73
AKIRIN1	-0.49677	7.86689	334.568	3.94197e-74
GLIPR2	-0.496336	7.40157	778.657	1.35584e-65
FAM189A1	-0.496109	7.37126	2792.26	1.35145e-105
AC016831.7	-0.495993	7.42354	583.705	2.9146e-64
IGFBP7	-0.495708	8.91842	177.95	2.02693e-40
NRSN2-AS1	-0.495628	7.39832	831.61	1.221e-62
AC245060.5	-0.495298	7.4132	608.34	9.58526e-57
IDUA	-0.495061	7.50664	382.848	3.64275e-81
DUSP22	-0.494978	7.57223	344.418	3.18218e-73
LYRM4	-0.493207	7.64041	340.04	2.65429e-75
COPS8	-0.492456	7.74821	362.772	3.62807e-80
FER	-0.492348	7.53843	330.399	1.61127e-61
ZNF559	-0.491637	7.41213	660.619	2.34044e-62
ARMC9	-0.491586	7.46364	403.188	3.12727e-53
PALM2	-0.491416	7.37324	2225.66	4.57243e-95
CCDC82	-0.490919	7.69481	346.823	9.37463e-77
APPL2	-0.490914	7.69547	322.807	1.30531e-71
CWC22	-0.490882	7.73561	344.194	3.42532e-76
BCL2L10	-0.490874	7.37905	1578.75	8.29195e-85
FBXW11	-0.490287	7.80113	352.979	4.513e-78
ZBTB21	-0.489932	7.46205	403.848	3.99743e-56
UGT2B11	-0.489795	7.37581	1824.16	1.46929e-87
SLC30A2	-0.48877	7.37021	2872.86	1.85932e-109
NDUFS5	-0.488744	9.75699	415.425	2.07435e-91
AC004233.3	-0.488509	7.383	1297.62	2.18935e-75
TMEM200B	-0.488383	7.38457	1194.09	1.18906e-68
EEF1D	-0.487938	10.1327	724.132	1.07387e-156
ARIH1	-0.487687	7.82821	338.616	5.35714e-75
ZCCHC24	-0.48696	7.38894	1025.01	3.26166e-69
KMT2A	-0.486752	8.06477	383.636	1.26096e-84
PTCH1	-0.486449	7.39768	820.149	4.95872e-64
GCC2	-0.48628	8.61514	515.374	1.15891e-112
THNSL2	-0.486216	7.5115	358.631	5.80613e-64
NME7	-0.485883	7.64444	330.194	3.41108e-73
SLC40A1	-0.483824	8.87247	258.79	7.30549e-58
CNN3	-0.483277	7.8262	278.97	3.34156e-62
CCDC91	-0.483158	7.65803	330.943	2.3564e-73
COPS5	-0.4826	7.99687	398.591	8.08708e-88
MEF2A	-0.482344	7.77684	318.873	9.1007e-71
ENOX2	-0.482063	7.44748	411.662	3.96653e-50
ETNK2	-0.4816	7.39164	913.989	1.43617e-62
AC104794.2	-0.481473	7.38925	1025.84	2.69622e-69
BAX	-0.480511	8.4149	380.069	7.291e-84
SHANK2	-0.480478	7.52517	324.363	2.25532e-64
ARL8A	-0.480203	7.90184	368.955	1.72903e-81
ZNF808	-0.480201	7.43792	475.494	7.63308e-59
AL390066.1	-0.479927	7.37061	2625.59	3.5689e-109
ZNF793	-0.479875	7.38337	1259.38	4.88478e-76
PCDH9	-0.479525	7.37049	2430.66	1.98144e-105
KNG1	-0.479103	7.36704	2601.96	8.85061e-141
LRG1	-0.479045	7.622	284.585	2.07705e-63
SYDE1	-0.47865	7.38572	1145.27	1.45857e-70
RNF217	-0.478502	7.40327	680.042	3.97922e-59
TSPAN31	-0.478025	7.81589	355.495	1.30673e-78
AC104667.2	-0.478021	7.38976	1000.89	2.13473e-69
CYP4A11	-0.477991	7.36861	3164.19	2.37123e-116
RFFL	-0.477868	7.56518	301.486	1.52074e-63
SAMD4A	-0.477866	7.45376	394.262	1.08601e-54
AKR1C4	-0.477713	7.37517	1700.97	4.90402e-87
MPHOSPH9	-0.477528	7.47693	340.05	1.05263e-47
ADCY9	-0.477126	7.44342	443.099	4.87494e-56
NUTM2B-AS1	-0.477029	7.7861	341.312	1.41795e-75
VLDLR	-0.47674	7.39989	725.023	2.74325e-58
SNX29	-0.476358	7.43386	456.94	2.25607e-52
SMC5	-0.476347	7.75298	302.504	2.95225e-67
BLZF1	-0.475885	7.66075	321.231	2.84178e-71
KIDINS220	-0.475776	7.78538	317.102	2.18182e-70
TNS3	-0.475738	7.57649	298.922	1.73273e-66
ZNF737	-0.475339	7.37653	1697.21	3.31591e-84
TRAM1	-0.47481	8.69331	465.75	3.99623e-102
DZANK1	-0.47481	7.40592	652.49	3.35398e-56
GGT6	-0.47467	7.44554	406.864	9.40342e-60
ZNF7	-0.474124	7.50386	351.973	2.18296e-60
C2orf76	-0.474074	7.50766	341.748	6.13087e-56
AP003469.4	-0.473289	7.39785	774.845	4.59106e-59
PTCHD1	-0.472883	7.36782	2547.9	6.99112e-117
CAMK2N2	-0.472825	7.38572	1042.29	7.4879e-66
MRS2	-0.472527	7.60838	321.182	2.91168e-71
ALPK3	-0.472318	7.38379	1185.48	7.03976e-72
ENTPD3	-0.472316	7.36682	3753.39	2.32423e-135
TP53BP1	-0.47169	7.61269	304.998	8.60841e-68
FAHD1	-0.470999	7.63398	308.073	1.88423e-68
SRRM3	-0.470384	7.40286	698.209	5.70615e-63
RTP4	-0.470331	7.522	299.791	7.23896e-65
PCDHB13	-0.469946	7.38162	1224.89	2.18132e-66
TCFL5	-0.469874	7.40269	676.821	9.1119e-55
AL391422.3	-0.469311	7.38891	1000.16	2.49253e-66
CCDC93	-0.4693	7.56908	313.372	1.37592e-69
ZNF250	-0.469215	7.40683	637.435	5.64666e-56
BACE1	-0.468566	7.42303	505.695	4.75128e-53
LINC02256	-0.468392	7.409	641.678	1.68815e-59
NDRG3	-0.468381	7.51902	323.007	8.46439e-57
TMEM86B	-0.468295	7.44965	379.888	6.82225e-51
XKR6	-0.467249	7.39449	804.454	1.21069e-57
CYP21A2	-0.466942	7.36708	3526.59	1.23543e-123
PDE1C	-0.466595	7.3701	2410.12	8.54532e-97
CYB5D2	-0.466456	7.52034	295.962	6.45533e-61
EFEMP1	-0.466428	7.37904	1131.49	1.43544e-71
AC098617.1	-0.466294	7.36758	2538.2	5.07822e-113
NDUFS2	-0.46627	8.4321	442.732	3.1557e-97
ATRX	-0.466186	8.34531	378.788	1.36888e-83
NCL	-0.466073	9.22779	474.126	6.62431e-104
PITPNA-AS1	-0.465772	7.58423	306.016	1.14695e-64
RIPK2	-0.465411	7.66419	278.11	5.11432e-62
SETBP1	-0.465078	7.37463	1760.1	1.27346e-79
TAX1BP3	-0.464717	7.88532	336.837	1.28773e-74
GATA2	-0.464566	7.37595	1560.06	7.58195e-74
EML1	-0.464215	7.37088	2282.85	6.02671e-90
MRGPRF	-0.464088	7.36999	2498.17	1.19957e-94
PRR26	-0.463898	7.41595	527.775	2.39968e-53
AC005256.1	-0.463614	7.41613	541.387	4.44282e-63
CYP4F11	-0.463597	7.37262	2086.61	1.46355e-94
HAAO	-0.46353	7.40958	592.011	1.30894e-53
SETDB1	-0.463513	7.51239	327.328	1.84189e-56
EMX1	-0.463441	7.36781	3254.47	7.77811e-108
UQCRB	-0.463264	10.1713	697.259	4.70894e-151
WAC-AS1	-0.46306	7.60025	292.26	4.66678e-65
COL4A5	-0.462856	7.37981	1270.77	3.28153e-67
PNN	-0.462601	8.27519	414.338	3.5373e-91
TMEM178B	-0.462394	7.36791	3141.91	3.83264e-107
PPP4R3B	-0.462043	7.90469	341.434	1.33522e-75
MFSD4A	-0.461702	7.44031	403.096	4.93336e-47
YPEL1	-0.461418	7.39884	733.461	1.53594e-60
SOCS1	-0.460899	7.55298	241.496	1.14008e-50
CCSER2	-0.460846	7.61561	286.129	9.68058e-64
DOCK5	-0.460633	7.72854	285.819	1.12804e-63
GMDS-DT	-0.460631	7.44024	429.585	5.68975e-54
AL021328.1	-0.460232	7.36922	2616.47	2.96786e-95
AL589669.1	-0.460222	7.3674	2455.16	1.31459e-108
ADAMTSL2	-0.459737	7.37496	1697.32	9.07983e-78
ANXA4	-0.459672	10.1723	368.108	2.62306e-81
KCNMB3	-0.45944	7.41398	534.207	2.06754e-50
TAF7	-0.45918	8.41986	391.564	2.55736e-86
YTHDC2	-0.458941	7.57806	295.426	9.75897e-66
FUNDC2	-0.458634	7.97917	342.587	7.56322e-76
TRIM6	-0.458336	7.37479	1645.41	1.15616e-76
ZNF253	-0.458317	7.40404	643.072	2.65083e-55
MEX3B	-0.457713	7.37411	1775.21	1.24929e-78
RAB30-AS1	-0.45654	7.59264	289.429	3.52157e-62
ARL2BP	-0.456393	7.80374	309.175	1.09367e-68
ZNF681	-0.45597	7.37291	1895.04	4.4115e-82
VIRMA	-0.455478	7.6172	292.115	5.01522e-65
PPP1R12B	-0.4552	7.55147	247.956	1.56923e-55
YPEL2	-0.455132	7.70625	258.537	8.27974e-58
BAG5	-0.454696	7.67414	287.982	3.87115e-64
AC140912.1	-0.454005	7.37107	2125.77	1.31978e-85
CDC42BPB	-0.453735	7.69469	287.366	5.24913e-64
ABL2	-0.45373	7.52079	298.568	2.46584e-58
TLE4	-0.453623	7.65556	234.673	1.14033e-52
ECHDC3	-0.453496	7.42283	439.328	6.38911e-44
MLLT11	-0.453359	7.39058	847.136	1.88613e-62
TRAPPC4	-0.453033	8.04967	349.733	2.23355e-77
GDF7	-0.452997	7.40328	627.833	2.01791e-52
RABL2A	-0.45283	7.45582	370.452	1.07969e-50
FASTKD2	-0.452821	7.6052	289.876	1.87788e-62
SNN	-0.452555	7.4221	482.31	1.1238e-50
ZSCAN16-AS1	-0.452247	7.5373	273.749	2.21387e-52
TMEM158	-0.452152	7.42494	426.516	5.89506e-52
NSD3	-0.452047	8.11639	354.436	2.2022e-78
ARID1A	-0.452026	7.59345	280.333	5.00935e-62
HRG	-0.451779	7.36606	2505.58	1.15982e-121
ACO1	-0.45175	7.53738	287.03	7.63138e-59
MTDH	-0.451511	8.84991	508.124	3.99799e-111
AC004520.1	-0.451413	7.37088	2087.33	1.42426e-82
PITPNM3	-0.451276	7.38427	1024.31	7.61835e-62
ADCY5	-0.450823	7.36678	3323.8	4.58978e-108
CYP26B1	-0.450504	7.36675	3221.52	4.36886e-107
LINC00623	-0.45026	7.74459	278.482	4.25459e-62
GAS6-AS1	-0.449731	7.38846	873.339	1.14811e-56
ISG20L2	-0.449245	7.66835	282.207	6.73533e-63
KLK11	-0.44856	8.05738	199.224	5.08878e-45
HECTD2	-0.448354	7.41875	485.553	1.01609e-48
TDRD1	-0.448239	7.36543	2837.48	6.19219e-130
FRMD6	-0.447938	7.47318	298.175	2.27319e-55
FAM131C	-0.447745	7.37357	1679.85	1.18736e-77
AL162411.1	-0.447332	7.37376	1563.53	9.64597e-69
ANKRD18A	-0.447286	7.43081	417.948	1.5601e-46
COQ7	-0.446727	7.55606	275.12	5.00124e-55
DIP2C	-0.446426	7.49391	303.93	5.01722e-52
PNPLA8	-0.446067	7.71696	274.185	3.56823e-61
ZDBF2	-0.445843	7.41899	469.816	1.72576e-48
GACAT2	-0.445838	7.36802	2638.96	2.74872e-98
SF3A3	-0.445746	7.7877	268.661	5.49786e-60
BAMBI	-0.445546	7.69498	210.626	1.75397e-47
DNAH14	-0.44522	7.62612	264.597	4.11388e-59
LYNX1	-0.445062	7.3808	1195.43	1.46982e-67
ZBTB38	-0.445019	7.90205	305.692	6.10888e-68
NBPF10	-0.444958	7.38495	978.95	1.85567e-61
ATP6V0E2	-0.444465	7.56394	274.821	3.77028e-53
GKAP1	-0.443215	7.44228	382.061	9.07735e-49
HIST1H2BG	-0.443136	7.45101	308.099	9.60267e-42
ZNF415	-0.442562	7.37322	1762.05	1.15365e-79
SKIL	-0.442561	8.07887	270.264	2.4853e-60
GRM5	-0.44251	7.37019	2048.71	6.1219e-86
TMEM176A	-0.441791	8.20263	216.327	1.03176e-48
ZNF606	-0.441536	7.39298	770.857	4.76461e-55
MSRB2	-0.441393	8.19895	363.61	2.40236e-80
AFDN-DT	-0.441113	7.39132	771.129	5.45649e-53
ATP10D	-0.440994	7.38852	858.365	6.06297e-58
PCAT1	-0.440763	7.4019	591.648	2.22782e-47
HIST1H4H	-0.440662	7.43426	379.953	5.93997e-46
ZNF720	-0.440443	7.54754	270.383	4.31576e-52
ITGA5	-0.439866	7.47131	306.708	1.54874e-50
LINC00941	-0.439481	7.4172	458.929	1.16356e-45
ZNF71	-0.439457	7.38298	989.979	1.00526e-58
DLX2	-0.439426	7.38117	991.357	1.14042e-54
ENDOD1	-0.439413	7.63738	241.263	4.33714e-54
UNC5CL	-0.439161	7.55176	255.78	3.2455e-57
ZFAND2B	-0.438968	7.68307	284.723	1.93998e-63
AL009178.2	-0.438704	7.36592	3412.91	4.16823e-108
TPST1	-0.438273	7.44878	348.091	3.53765e-44
ATG10	-0.436858	7.48338	301.958	4.00118e-45
ZNF528	-0.436566	7.41088	526.965	2.15055e-53
INHBE	-0.436461	7.36494	2646.31	1.39691e-122
CKMT2	-0.436256	7.36496	2774.62	1.39691e-122
KIAA0319L	-0.43621	7.77441	248.449	1.22886e-55
SLC41A1	-0.43619	7.43132	403.924	3.81613e-47
NCR3LG1	-0.436168	7.37563	1393.01	3.59943e-68
SEMA5B	-0.436064	7.36551	2592.97	1.24762e-110
MTERF4	-0.436044	7.62962	277.731	6.16902e-62
MYO1C	-0.435724	7.94853	303.237	2.05486e-67
EID1	-0.435368	8.567	452.452	2.69357e-99
AUTS2	-0.434218	7.45414	309.407	2.5034e-39
GRID1	-0.434134	7.36601	3285.51	3.56199e-101
C1QTNF1	-0.433238	7.41975	426.417	2.11929e-44
RAB13	-0.433085	8.56321	346.306	1.20908e-76
ZNF260	-0.432888	7.49426	294.525	5.59722e-50
LANCL1	-0.432075	7.53817	268.272	1.38305e-49
AC068491.3	-0.431848	7.38274	994.013	1.57351e-59
ZC3H13	-0.43174	7.87075	278.879	3.49623e-62
ANKRD16	-0.431528	7.46607	321.032	3.07822e-46
PTAR1	-0.43147	7.5844	247.158	8.81668e-52
RUFY2	-0.431297	7.58823	256.631	5.76005e-57
ARHGEF17	-0.431292	7.39663	659.571	1.53677e-50
CD83	-0.430972	7.42096	391.518	1.4585e-42
RTN4RL1	-0.430884	7.36873	2330.55	2.50698e-85
AL034417.3	-0.429988	7.39149	719.073	3.62246e-54
TCEA2	-0.4298	7.62318	265.24	2.99126e-59
TBCE	-0.428687	7.431	371.216	4.90858e-40
2021-03-07	-0.428622	7.80259	283.601	3.37979e-63
ZNF92	-0.428441	7.5046	262.708	4.92008e-41
CBLL1	-0.42834	7.59242	247.472	3.56223e-50
CCDC102A	-0.427599	7.43879	362.432	1.38387e-43
SOX4	-0.427024	9.54837	236.684	4.2047e-53
FBXL19-AS1	-0.42624	7.38114	1066.74	7.13913e-62
PRLR	-0.426168	7.41118	455.116	4.6049e-46
NCKAP1	-0.426127	8.19089	332.527	1.07915e-73
SLC26A9	-0.425669	7.36788	2267.7	4.23128e-101
LYSMD3	-0.42511	7.52777	257.286	2.2465e-47
TRIM73	-0.425105	7.44209	341.172	6.14378e-42
MEX3A	-0.424909	7.40862	481.973	7.93159e-51
TMPRSS13	-0.424834	7.39277	699.384	1.24941e-54
PUM3	-0.424801	7.68155	236.417	4.80099e-53
COL4A1	-0.423902	7.41151	423.93	1.18338e-46
NFAT5	-0.423619	7.84448	235.855	6.34493e-53
TMEM72	-0.423494	7.36483	2562.16	3.23114e-106
ZNF354B	-0.423395	7.41899	429.532	6.74888e-43
CAPS	-0.423371	8.10954	194.154	6.34034e-44
STK19	-0.423361	7.5498	247.932	1.81495e-51
AL450998.2	-0.422889	7.41997	418.286	2.77761e-42
SLC39A1	-0.422791	8.17729	333.775	5.82986e-74
NFKBIZ	-0.421353	8.01204	187.955	1.38807e-42
ZBED9	-0.42124	7.37256	1604.93	1.47857e-69
ZC2HC1C	-0.421113	7.40607	521.615	6.04448e-47
CEP41	-0.421087	7.47356	286.228	6.54514e-42
CCDC71L	-0.42108	7.60976	236.166	5.95215e-53
ZNF766	-0.42062	7.54235	260.729	1.71394e-54
NOP14-AS1	-0.420437	7.43838	351.482	3.8691e-44
MYOM2	-0.420419	7.38406	874.291	8.00116e-53
TMEM74B	-0.41975	7.38704	787.925	5.42525e-51
OGDH	-0.419596	7.64213	232.083	4.12475e-52
DNAJB5	-0.419365	7.36925	1921.71	2.4647e-74
NUDT9	-0.419257	7.58612	230.379	9.60784e-52
GTF2H2C	-0.418729	7.46421	303.962	3.29068e-43
LINC00884	-0.418134	7.38573	857.894	3.27069e-56
CTPS1	-0.418109	7.51443	256.011	3.44999e-48
AL445472.1	-0.418093	7.39321	670.611	2.09504e-49
C8orf33	-0.418078	7.85392	272.425	8.52874e-61
FNTA	-0.417928	7.89754	282.388	6.15869e-63
STX18	-0.417818	7.6369	253.57	9.70595e-57
HMGN3-AS1	-0.417685	7.38781	736.821	2.55357e-47
LINC00662	-0.417658	7.459	311.494	1.73285e-46
AC048341.1	-0.417637	7.40147	552.337	3.938e-46
DLEU2	-0.417547	7.48559	265.014	1.26394e-40
SUGCT	-0.41754	7.36524	3083.04	1.6798e-102
SYT13	-0.417443	7.64856	221.053	9.85854e-50
PLGLB1	-0.416731	7.37964	1080.64	2.01548e-68
NCK2	-0.416003	7.85089	271.997	1.05385e-60
RBBP5	-0.415951	7.55051	246.889	7.4256e-49
MSANTD4	-0.415818	7.46545	290.499	7.1371e-41
MAFK	-0.415663	7.72095	217.33	6.26666e-49
BPGM	-0.415633	7.59047	233.12	2.46486e-52
BTBD7	-0.415471	7.69322	229.304	1.63835e-51
MLH3	-0.414986	7.68768	235.52	7.49071e-53
SLC4A3	-0.414908	7.47862	285.44	1.51593e-48
CARF	-0.414784	7.44919	312.716	2.36783e-41
RGL4	-0.41474	7.37384	1317.01	5.47675e-61
KDM6B	-0.414604	7.59583	221.634	7.38862e-50
HLA-DPB1	-0.414263	7.66885	190.989	3.06544e-43
SOX12	-0.413748	7.45239	316.425	5.28867e-45
MSRB3	-0.413703	7.36737	2232.98	1.81355e-81
LONRF1	-0.413427	7.47562	271.939	6.32851e-40
ST8SIA3	-0.413363	7.36352	2706.27	2.24551e-120
ARV1	-0.413248	7.60361	247.403	2.06352e-55
STC1	-0.412858	7.40456	414.094	4.68096e-37
TLDC2	-0.412785	7.39033	680.209	6.31173e-47
GALNT10	-0.412542	7.584	210.51	1.85869e-47
TANK	-0.412514	7.84216	273.998	3.91498e-61
PTPRE	-0.411991	7.58142	223.999	5.10942e-50
SARAF	-0.411489	8.80184	421.949	8.43564e-93
SPTBN1	-0.411441	9.3062	373.384	1.95454e-82
DRC3	-0.411427	7.40002	542.946	7.02508e-44
PHF14	-0.411363	8.13872	319.882	5.53133e-71
ATP2B2	-0.410849	7.36395	2598.99	2.68432e-105
DDX39B	-0.410846	7.60143	226.026	8.34065e-51
RPS6KC1	-0.41076	7.47745	278.432	8.46099e-44
TAPT1	-0.410666	7.51776	254.103	2.41016e-50
NPNT	-0.410497	8.15175	181.6	3.28809e-41
DUSP3	-0.41047	7.71059	240.794	5.47374e-54
GPRASP1	-0.410265	7.38045	958.45	8.68206e-52
ZSCAN30	-0.410103	7.43103	361.358	4.47061e-42
DOK7	-0.409578	7.41671	429.508	4.58719e-46
IRF1	-0.409222	8.02127	178.995	1.20428e-40
LINC00513	-0.408977	7.39552	584.563	5.06947e-44
PPP1R15B	-0.408769	7.8953	221.543	7.72877e-50
EPB41L4A-AS1	-0.408488	8.23902	239.639	9.70687e-54
JADE2	-0.408483	7.57049	223.95	1.44198e-47
TMEM163	-0.40842	7.44198	301.193	1.917e-38
RTL8B	-0.408337	7.38335	801.957	1.47633e-46
HLA-DRB5	-0.408325	7.377	995.078	1.05748e-55
SFXN3	-0.407956	7.60844	225.486	2.46724e-50
DTX3	-0.40758	7.49274	264.081	6.93897e-45
DNAJB9	-0.407512	7.77874	205.2	2.60387e-46
SP4	-0.407341	7.44216	325.241	3.74142e-41
RRAGC	-0.407248	7.61772	228.041	3.0673e-51
AC011139.1	-0.407179	7.36434	2871.45	1.07216e-94
CANX	-0.407031	9.18345	454.819	8.44697e-100
PIK3C3	-0.407	7.50714	250.508	2.17041e-43
MRPL9	-0.406504	7.83471	271.381	1.43003e-60
CADPS2	-0.406378	7.49744	247.61	3.4432e-43
MFSD14C	-0.40536	7.56427	220.633	8.30566e-43
NAAA	-0.405351	7.47089	260.005	6.13406e-36
RSPH9	-0.40441	7.37019	1656.38	4.0935e-65
RNF14	-0.404228	7.58613	231.784	1.19113e-48
LAMTOR2	-0.404147	8.6079	386.376	3.27765e-85
QPRT	-0.404035	7.55812	201.523	1.62168e-45
SLC39A6	-0.403468	7.78172	238.534	1.67941e-53
EXOC8	-0.403165	7.45935	280.882	1.69421e-38
MYO18A	-0.402703	7.45247	297.434	3.81682e-42
PPIL3	-0.402703	7.67587	229.794	1.76672e-51
AC127164.1	-0.402555	7.36517	2700.82	7.79016e-85
UBN2	-0.402506	7.64504	216.263	1.06493e-48
CLSTN3	-0.402258	7.45589	292.761	5.38712e-42
AC119427.1	-0.401926	7.36907	1811.33	4.28879e-70
CNST	-0.401783	7.485	264.306	2.04792e-43
ZC3H15	-0.400889	8.45401	374.556	1.09799e-82
APC	-0.400755	7.61383	221.197	9.17793e-50
BCL7A	-0.40053	7.66141	210.645	1.73761e-47
ARPC5	-0.400276	8.71051	377.081	3.17003e-83
GSPT2	-0.400224	7.48528	256.646	6.27021e-43
ATP5F1C	-0.40012	9.2089	388.294	1.27665e-85
TMEM121	-0.399905	7.38176	803.882	4.03056e-45
CARNS1	-0.399764	7.39118	622.318	5.93798e-45
SERTAD1	-0.399244	8.14161	200.093	3.30214e-45
SLCO2A1	-0.398525	7.3779	918.606	3.21296e-50
SOBP	-0.398454	7.36674	2117.07	4.12908e-78
GOLGA8B	-0.398304	7.56471	212.679	6.3235e-48
GLRB	-0.398302	7.37215	1430.32	5.72438e-66
SMARCA2	-0.398058	7.62378	214.698	2.31748e-48
GPR108	-0.39788	7.82389	246.003	4.13206e-55
RIT1	-0.397872	7.60166	225.256	1.2229e-50
ZNF506	-0.397852	7.50708	240.451	2.68397e-42
SCAPER	-0.39777	7.49655	244.258	2.59023e-43
APOC2	-0.397741	7.36749	1876.29	1.65967e-77
LINC00671	-0.39773	7.36523	2574.78	4.36622e-80
ABCC6	-0.397657	7.3851	800.675	4.41993e-53
KATNAL1	-0.39761	7.42932	331.224	5.8077e-37
GGT5	-0.39727	7.37885	838.927	6.3308e-49
ARHGEF28	-0.396955	7.57166	209.192	4.28858e-45
ZNF85	-0.396773	7.37018	1579.11	6.01272e-65
LRAT	-0.396753	7.37081	1490.32	3.56593e-65
SNAPIN	-0.396543	7.77985	247.48	1.98696e-55
CSRNP1	-0.3965	7.67952	179.357	1.00519e-40
LBH	-0.396359	7.63138	166.845	5.14274e-38
KLF12	-0.395043	7.41541	395.441	4.01128e-40
CCDC121	-0.394795	7.41185	411.754	4.3571e-40
TPM3	-0.394688	9.09888	414.89	2.6981e-91
AC025575.2	-0.394666	7.36607	2328.46	5.2564e-77
LURAP1L	-0.39433	7.80199	198.702	6.59637e-45
MAVS	-0.394219	7.63679	211.731	1.01302e-47
LINC00987	-0.394135	7.3645	2727.8	2.03414e-92
AC016831.1	-0.394031	7.43237	320.682	1.27192e-40
POU2F1	-0.394	7.57653	206.691	5.19595e-43
CPM	-0.393913	7.50259	210.391	1.97128e-47
RIPOR1	-0.393166	7.47274	249.563	8.05049e-36
TTL	-0.392889	7.46748	258.654	9.79037e-39
IMMP2L	-0.392813	7.57172	225.509	1.07837e-50
TTC1	-0.391874	7.83745	240.828	5.3804e-54
L3HYPDH	-0.391791	7.41791	373.01	1.40405e-38
BRAF	-0.391678	7.64361	209.609	2.90802e-47
USP37	-0.391475	7.51112	220.787	2.29511e-37
CAP2	-0.391088	7.41902	374.718	1.74438e-40
ZNF460	-0.390919	7.42502	350.556	2.42527e-38
FXYD6-FXYD2	-0.390806	7.36292	2535.21	6.09976e-98
NEGR1	-0.390749	7.36255	2661.55	3.88945e-107
CUL3	-0.390368	7.92652	240.499	6.33573e-54
STMN3	-0.390012	7.42838	321.738	3.16328e-39
RELL2	-0.389725	7.39764	535.805	2.86479e-45
CNTNAP5	-0.389282	7.3622	2719.6	2.17751e-113
ZC2HC1A	-0.388753	7.64336	210.903	1.52857e-47
WDPCP	-0.387784	7.40048	477.122	2.55438e-39
PCOLCE	-0.387755	7.4502	276.106	6.03947e-37
FAM222B	-0.387533	7.70004	207.599	7.90142e-47
NACAD	-0.387529	7.37082	1427.04	3.15722e-58
WRB	-0.38737	7.56376	218.347	6.70697e-43
ZNF189	-0.387113	7.44375	292.018	9.0096e-40
CYP1B1	-0.386901	7.38863	586.761	2.3388e-42
KIAA1324L	-0.386397	7.38064	779.141	2.98348e-42
METTL7B	-0.386236	7.60084	187.424	1.80821e-42
CLHC1	-0.386011	7.40023	470.49	8.68616e-38
KIF3B	-0.385797	7.71172	209.339	3.32655e-47
EPHA6	-0.38574	7.36634	2047.56	2.56413e-72
METTL8	-0.385699	7.51936	215.237	2.47849e-36
AL731577.1	-0.385546	7.3633	3087.15	4.05764e-85
ARHGAP24	-0.385397	7.42233	328.058	1.98592e-37
CNNM1	-0.385247	7.39557	544.392	4.8891e-46
AC008703.1	-0.385203	7.36264	3155.55	6.80681e-97
ZBTB4	-0.385052	7.49969	231.974	4.63236e-40
AC005261.1	-0.384066	7.63474	204.801	3.17532e-46
TBC1D19	-0.383687	7.4229	348.1	1.21787e-37
PCDHGA2	-0.383569	7.36273	2452.3	2.55401e-91
LINC01137	-0.383437	7.4617	265.402	3.26462e-47
STBD1	-0.382766	7.38292	749.617	3.35349e-45
RB1CC1	-0.382622	7.94937	218.719	3.14349e-49
DNAH7	-0.382597	7.42651	307.103	5.68887e-34
TRA2A	-0.38174	8.02517	242.253	2.65349e-54
EPHX3	-0.381557	7.38685	646.688	5.29951e-43
FBXO2	-0.381355	7.47945	222.214	3.25797e-42
ETV4	-0.381024	7.52985	201.828	6.3306e-39
KIAA1586	-0.380444	7.42377	313.188	2.05439e-32
INTS3	-0.380433	7.6378	203.801	5.2215e-46
SLU7	-0.380261	7.77145	218.116	4.24252e-49
PCDHB14	-0.380116	7.41678	333.505	1.97493e-33
FAM114A2	-0.379816	7.4593	260.703	2.09343e-37
MIPOL1	-0.379807	7.45915	246.246	2.92508e-34
TMEM209	-0.379513	7.54884	204.181	8.00552e-40
SMOC1	-0.379243	7.39336	481.328	1.64081e-36
NDUFA10	-0.379231	8.34574	328.664	7.25343e-73
HSPA9	-0.37916	8.3186	288.857	2.51174e-64
TOMM20	-0.378258	9.4333	434.039	2.24008e-95
IFT22	-0.377686	7.92945	216.298	1.0469e-48
ATXN1	-0.377462	7.53102	200.993	1.35929e-42
ZNF28	-0.37683	7.44978	269.599	3.51122e-37
ECI2	-0.376812	7.68841	198.803	6.27263e-45
TSC22D2	-0.376728	7.67365	176.051	5.2218e-40
C6orf62	-0.376536	7.94754	217.643	5.36457e-49
FYB2	-0.376532	7.36191	2531.01	4.55683e-101
PCDHB10	-0.375699	7.37551	932.712	4.84646e-45
MSANTD3	-0.375184	7.58095	197.968	9.50359e-45
GPAA1	-0.375156	8.01403	231.711	4.96053e-52
AGAP1	-0.374907	7.57752	186.669	4.97258e-40
XPR1	-0.374842	7.48778	224.024	1.14937e-36
NALCN	-0.374837	7.36559	2031.05	1.32381e-70
C6	-0.374837	7.372	1106.52	3.03913e-54
PPP1R13B	-0.374778	7.45366	264.59	9.76464e-38
KIF21A	-0.374715	7.78157	204.023	4.6764e-46
CCDC141	-0.374227	7.36405	2395.87	7.17898e-79
TM7SF3	-0.373888	7.96048	205.885	1.85261e-46
PDE8B	-0.373684	7.36269	2863.45	6.04851e-81
FBXL7	-0.373603	7.36261	2983.74	1.01151e-80
AC004951.1	-0.373459	7.40689	398.914	6.7747e-36
C19orf81	-0.37344	7.47704	197.899	2.18889e-31
SV2A	-0.373428	7.37526	942.823	7.19514e-47
CNPY4	-0.373381	7.40068	428.136	5.08826e-34
CD58	-0.373168	7.79884	199.549	4.32843e-45
AC116351.1	-0.372946	7.3617	2636.5	2.06024e-99
VIL1	-0.372889	7.64816	149.842	2.49507e-34
EBLN3P	-0.372705	7.82212	208.157	5.98445e-47
PPP1R15A	-0.372674	8.85233	174.114	1.37157e-39
HAX1	-0.372638	8.20035	267.909	7.9791e-60
WDR73	-0.372551	7.63838	200.154	3.20422e-45
ST6GAL1	-0.372269	7.48035	209.697	3.92832e-40
ZNF516	-0.37223	7.40493	412.999	3.02938e-37
COG2	-0.37216	7.62927	198.2	8.46713e-45
CYB5R1	-0.372131	7.71999	202.065	1.23854e-45
TJP1	-0.37197	8.05929	235.182	8.85907e-53
GRM5-AS1	-0.371716	7.36189	3229.46	3.79804e-94
METTL16	-0.371676	7.50144	205.414	1.79553e-32
ZNF34	-0.371639	7.40019	446.82	2.12471e-37
LKAAEAR1	-0.371534	7.36287	2727.75	4.3663e-80
NCAM1	-0.37139	7.36527	1982.4	1.91924e-67
KCND2	-0.371309	7.36239	3108.25	6.23475e-87
NMB	-0.371074	7.88274	139.182	5.13811e-32
ZNF134	-0.370894	7.41309	352.709	5.83762e-34
PKIG	-0.370404	7.63097	187.789	7.35656e-41
RNF157	-0.370321	7.3958	457.702	1.65378e-36
HMBOX1	-0.369819	7.45746	245.055	1.39483e-35
CSNK1G1	-0.369696	7.52078	203.277	1.83121e-37
AL353751.1	-0.368805	7.362	2352.14	1.28933e-85
BBS10	-0.368142	7.43199	277.379	6.98257e-31
FAM71A	-0.368102	7.36792	1493.1	4.19769e-59
XPC	-0.367904	7.61946	183.88	1.05648e-41
DUSP8	-0.367893	7.5773	178.665	1.4195e-40
AFF2	-0.36739	7.36177	2423.74	7.99067e-88
SLC49A3	-0.367321	7.48743	222.983	3.78137e-50
ZFP3	-0.367184	7.37453	994.893	2.23221e-48
ACSS3	-0.367124	7.36185	3255.61	8.96983e-87
DCAF17	-0.367108	7.44396	253.989	2.16073e-31
SECISBP2L	-0.367041	7.63642	187.398	1.83201e-42
ZNF623	-0.367011	7.44336	266.192	4.03394e-34
PRKD1	-0.366891	7.36184	3269.43	6.37537e-88
C1orf216	-0.366516	7.40202	453.271	4.50572e-44
SDHC	-0.366421	8.21268	269.492	3.64359e-60
RIPOR3	-0.366403	7.36182	2373.57	1.55038e-86
MEX3D	-0.366126	7.54015	186.325	2.51089e-35
LINC02212	-0.365243	7.36145	2511.23	2.41958e-93
C2orf40	-0.365217	7.36116	3464.91	3.32949e-102
DNASE1	-0.365064	7.46198	230.761	1.50557e-35
AL161669.3	-0.36479	7.43094	270.532	1.37125e-32
AC016705.2	-0.364638	7.37036	1268.03	9.79273e-54
SLC35E3	-0.364624	7.59542	183.757	1.12293e-41
SLC4A1AP	-0.364231	7.58104	192.325	1.91552e-42
ZNF337-AS1	-0.36403	7.39047	523.107	1.8614e-36
FMNL2	-0.364016	7.614	171.499	5.04968e-39
DNAJC27	-0.363149	7.42663	288.49	4.12105e-33
C8G	-0.363148	7.85248	114.909	9.74663e-27
HEATR1	-0.363119	7.59374	179.024	1.48168e-37
HYI	-0.363055	7.91158	193.018	1.11628e-43
MAP4K4	-0.362723	7.90359	192.76	1.26928e-43
C1orf198	-0.362513	7.58975	187.403	3.78145e-42
LRRC37A3	-0.362105	7.37556	884.729	1.55001e-43
LBR	-0.362041	8.07221	199.455	4.53564e-45
AC027682.6	-0.361853	7.36507	1898.69	2.23701e-62
PCDHGB2	-0.360853	7.36818	1433.76	2.41849e-53
IAH1	-0.360602	8.08511	251.509	2.69571e-56
HIST1H2BC	-0.36057	7.47136	198.27	1.78364e-32
GPANK1	-0.360488	7.59232	186.334	3.98409e-42
RAD17	-0.36012	7.53814	186.729	8.16231e-35
CWC27	-0.35994	7.58364	181.566	7.87688e-35
CPNE8	-0.359846	7.61819	177.772	2.21492e-40
ANOS1	-0.359763	7.36372	2131.88	1.79e-66
RGL1	-0.359202	7.37235	1083.58	3.19982e-51
PLEKHM3	-0.359114	7.41311	335.385	3.74166e-33
TMEM267	-0.35871	7.60957	175.542	8.18909e-35
ATAD3C	-0.358668	7.37873	726.486	1.51243e-40
ZNF665	-0.358591	7.36172	3107.02	1.93945e-85
AC107375.1	-0.358513	7.37246	1089.43	1.01408e-48
SLC39A10	-0.358462	7.7985	170.107	1.01107e-38
CYP4V2	-0.358378	7.5199	193.68	1.67373e-39
ZNF658	-0.358188	7.3817	677.646	9.48807e-40
SPIN1	-0.357695	7.65594	180.291	6.31329e-41
GRIN2A	-0.357661	7.36292	2427.19	2.22543e-75
SMARCD1	-0.35764	7.6432	179.964	7.42806e-41
2021-09-01	-0.357061	7.48835	193.659	1.16828e-30
SLC28A3	-0.356308	7.39186	488.471	4.49569e-40
ZNF141	-0.355314	7.43077	270.614	2.05767e-32
ZNF66	-0.355202	7.36735	1439.32	3.86894e-52
FN3K	-0.355101	7.46089	219.446	1.52265e-37
MDC1	-0.355036	7.4274	273.515	1.06697e-30
GNAI3	-0.354728	8.0868	187.587	1.66726e-42
FCGR3B	-0.354715	7.36474	1815.09	7.89268e-71
SLCO4C1	-0.3545	7.36394	2111.03	1.35752e-68
KLHL9	-0.354195	7.55607	177.719	1.08548e-37
MCPH1	-0.354179	7.5175	183.807	3.83524e-32
TRIM26	-0.354125	7.54439	182.919	8.07524e-38
ZNF814	-0.354075	7.39166	485.179	9.24211e-36
RAB11FIP2	-0.35379	7.54214	182.684	1.91628e-41
PRPF3	-0.353678	7.58917	177.574	2.3543e-39
SLC7A2	-0.352992	7.37478	822.79	1.44649e-41
WDR19	-0.352877	7.43996	240.75	1.28831e-29
NINL	-0.352797	7.43604	258.335	6.76412e-33
AC090114.2	-0.352655	7.42227	294.859	1.79345e-33
AP002884.1	-0.352615	7.45154	230.718	1.20954e-33
FAM193A	-0.352601	7.50224	198.457	1.01901e-37
ERCC6L2	-0.352561	7.48283	194.995	3.25886e-31
MPC2	-0.352408	9.30173	252.27	1.84856e-56
PAWR	-0.351712	8.27605	247.218	2.26223e-55
PKN1	-0.351625	7.78854	188.849	8.89226e-43
OSBPL1A	-0.351027	7.57607	157.497	5.4563e-36
SMIM19	-0.35091	7.93913	195.592	3.09987e-44
CHST1	-0.350805	7.36113	3166.89	1.39906e-80
USP22	-0.350426	7.75957	176.739	3.70605e-40
C5AR1	-0.350192	7.37686	760.405	3.87768e-40
KIF1A	-0.350142	7.36091	2359.82	9.42626e-82
ZNF337	-0.350006	7.43961	250.415	1.05176e-32
[truncated: 18,276 more rows]
