# Supplementary material for: Single-cell transcriptomic analysis suggests two molecularly distinct subtypes of intrahepatic cholangiocarcinoma
Source: Nat Commun. 2022 Mar 28;13:1642. doi: 10.1038/s41467-022-29164-0 (PMC8960779; doi:10.1038/s41467-022-29164-0)
Supplement: Supplementary file 9 — Supplementary Data 6 [file 41467_2022_29164_MOESM9_ESM.xlsx]

## Sheet: Sheet1
Supplementary Data 6. Marker genes of six clusters of myeloid cells.
Gene	Avg_logFC	PCT.1	PCT.2	P-value	Adjusted P-value	Cluster
S100A12	3.6568	0.783	0.078	0	0	0
S100A9	2.52119	0.984	0.674	0	0	0
THBS1	2.48903	0.477	0.154	0	0	0
FCN1	2.45539	0.983	0.202	0	0	0
S100A8	2.41258	0.948	0.451	0	0	0
APOBEC3A	2.21938	0.47	0.049	0	0	0
FOLR3	2.11906	0.299	0.054	0	0	0
RBP7	1.96745	0.439	0.082	0	0	0
VNN2	1.93146	0.351	0.076	0	0	0
CD300E	1.91501	0.663	0.15	0	0	0
CLEC4E	1.9115	0.646	0.169	0	0	0
RIPOR2	1.91149	0.673	0.207	0	0	0
AC245128.3	1.90844	0.408	0.06	0	0	0
CDA	1.89754	0.442	0.07	0	0	0
LILRA5	1.87143	0.66	0.19	0	0	0
STEAP4	1.85458	0.177	0.011	0	0	0
CD36	1.83167	0.745	0.201	0	0	0
VCAN	1.83123	0.902	0.293	0	0	0
CFP	1.80151	0.818	0.197	0	0	0
MEGF9	1.74068	0.588	0.213	0	0	0
CYP1B1	1.72541	0.327	0.056	0	0	0
SELL	1.71096	0.624	0.241	0	0	0
CRISPLD2	1.63642	0.228	0.014	0	0	0
CDC42EP2	1.60506	0.247	0.032	0	0	0
LINC00937	1.57474	0.298	0.05	0	0	0
NRGN	1.56353	0.489	0.139	0	0	0
ZBTB16	1.52924	0.28	0.049	0	0	0
CKAP4	1.52589	0.324	0.073	0	0	0
NHSL2	1.4912	0.227	0.022	0	0	0
FGR	1.48868	0.858	0.46	0	0	0
NFE2	1.48454	0.189	0.019	0	0	0
CLEC12A	1.46507	0.805	0.401	0	0	0
LYST	1.43927	0.698	0.336	0	0	0
NRG1	1.41859	0.322	0.065	0	0	0
PADI4	1.41791	0.155	0.02	6.35098e-245	1.33688e-240	0
FFAR2	1.41699	0.157	0.02	2.25987e-246	4.75702e-242	0
CLEC4D	1.41545	0.219	0.031	0	0	0
CD55	1.40278	0.81	0.533	0	0	0
CCDC69	1.39561	0.466	0.186	0	0	0
MEFV	1.39307	0.306	0.071	0	0	0
LRRK2	1.39135	0.64	0.339	0	0	0
FPR2	1.38766	0.364	0.094	0	0	0
TMEM170B	1.38288	0.437	0.175	0	0	0
NCF1	1.36827	0.748	0.525	0	0	0
RAB3D	1.36748	0.265	0.051	0	0	0
CSF3R	1.35486	0.787	0.515	0	0	0
MPP7	1.33395	0.189	0.03	1.51379e-273	3.18652e-269	0
CDC42EP3	1.33068	0.438	0.199	0	0	0
CSTA	1.32573	0.929	0.621	0	0	0
GPBAR1	1.32263	0.314	0.087	0	0	0
GCH1	1.3225	0.346	0.134	9.51494e-280	2.00289e-275	0
RAB27A	1.31896	0.404	0.171	0	0	0
PRKCB	1.3132	0.655	0.314	0	0	0
UBXN11	1.31109	0.451	0.184	0	0	0
SMARCD3	1.30879	0.242	0.048	0	0	0
PLCB1	1.30818	0.175	0.016	0	0	0
MTMR11	1.3077	0.247	0.044	0	0	0
EHD1	1.29879	0.34	0.157	8.19401e-218	1.72484e-213	0
AC005280.2	1.29006	0.203	0.034	8.0366e-285	1.6917e-280	0
LDLR	1.2685	0.209	0.041	3.40408e-266	7.16558e-262	0
LILRA1	1.26208	0.277	0.073	4.9699e-306	1.04616e-301	0
TESC	1.26087	0.303	0.084	0	0	0
AL034397.3	1.25811	0.38	0.162	3.10734e-276	6.54095e-272	0
C19orf38	1.25585	0.513	0.246	0	0	0
NAMPT	1.2508	0.967	0.853	0	0	0
STXBP2	1.24381	0.86	0.57	0	0	0
PRAM1	1.24306	0.471	0.215	0	0	0
LILRB2	1.2345	0.713	0.403	0	0	0
PTGER2	1.23083	0.251	0.069	7.46454e-257	1.57129e-252	0
TMEM154	1.22442	0.422	0.198	1.18234e-297	2.48882e-293	0
AQP9	1.21564	0.447	0.2	0	0	0
NUP214	1.21509	0.687	0.407	0	0	0
GAS7	1.21276	0.469	0.231	0	0	0
POU2F2	1.2104	0.613	0.351	0	0	0
IRAK3	1.19812	0.738	0.449	0	0	0
EIF4E3	1.19673	0.289	0.103	7.18141e-242	1.51169e-237	0
SLC2A6	1.18502	0.262	0.103	1.67168e-186	3.51888e-182	0
FYN	1.17715	0.409	0.163	0	0	0
FAM45A	1.16596	0.533	0.304	0	0	0
C15orf39	1.16579	0.334	0.133	6.69739e-256	1.4098e-251	0
ACSL1	1.16466	0.661	0.45	0	0	0
SGMS2	1.16171	0.277	0.107	1.6727e-207	3.52103e-203	0
FPR1	1.15371	0.85	0.563	0	0	0
KCNE3	1.15057	0.377	0.174	8.64139e-257	1.81901e-252	0
WARS	1.15014	0.654	0.41	0	0	0
44256	1.14625	0.12	0.014	6.57908e-191	1.3849e-186	0
RFLNB	1.1447	0.172	0.049	5.57084e-159	1.17266e-154	0
NACC2	1.14303	0.213	0.059	8.04811e-211	1.69413e-206	0
CPPED1	1.13895	0.643	0.412	0	0	0
F5	1.13262	0.121	0.012	1.93208e-204	4.06702e-200	0
METTL9	1.13215	0.665	0.451	0	0	0
S1PR3	1.12443	0.116	0.008	4.84462e-216	1.01979e-211	0
ATP2B1-AS1	1.12015	0.545	0.318	0	0	0
EREG	1.11271	0.365	0.128	4.68788e-298	9.86799e-294	0
ECE1	1.11245	0.173	0.044	6.47245e-180	1.36245e-175	0
DUSP6	1.11014	0.597	0.381	0	0	0
SLC24A4	1.10539	0.294	0.116	4.39947e-217	9.26089e-213	0
NFAM1	1.10431	0.4	0.197	5.89554e-256	1.24101e-251	0
FBXL5	1.10301	0.628	0.42	0	0	0
PELI2	1.10039	0.211	0.056	4.19728e-215	8.83528e-211	0
NBEAL2	1.10027	0.329	0.157	5.88293e-196	1.23836e-191	0
MPEG1	1.09898	0.91	0.635	0	0	0
TPPP3	1.09807	0.138	0.022	4.1386e-190	8.71176e-186	0
CHST15	1.09716	0.385	0.177	8.1984e-260	1.72576e-255	0
TNFRSF1B	1.09093	0.898	0.695	0	0	0
CAMKK2	1.08237	0.27	0.114	1.58543e-181	3.33732e-177	0
IRS2	1.08038	0.553	0.341	6.93748e-289	1.46034e-284	0
CTSS	1.07559	0.998	0.981	0	0	0
TKT	1.074	0.924	0.774	0	0	0
VNN1	1.07266	0.145	0.049	3.31641e-110	6.98105e-106	0
MGST1	1.06901	0.367	0.156	2.54787e-262	5.36326e-258	0
CDKN2D	1.0689	0.345	0.167	1.96894e-200	4.14463e-196	0
BST1	1.06794	0.434	0.244	9.72215e-235	2.04651e-230	0
GLT1D1	1.06774	0.168	0.041	2.60358e-181	5.48053e-177	0
VSTM1	1.06608	0.152	0.031	4.27208e-182	8.99273e-178	0
RASSF3	1.06288	0.559	0.333	0	0	0
PLPPR2	1.06164	0.17	0.039	3.18217e-191	6.69847e-187	0
NOTCH2	1.04322	0.509	0.295	1.8267e-305	3.84521e-301	0
AGTRAP	1.03736	0.686	0.455	0	0	0
CCDC88C	1.03549	0.178	0.043	1.0705e-192	2.25339e-188	0
ASGR2	1.03404	0.206	0.072	9.2736e-158	1.95209e-153	0
AGTPBP1	1.03384	0.369	0.203	3.7089e-186	7.80723e-182	0
NBPF19	1.03216	0.289	0.131	1.62238e-171	3.4151e-167	0
P2RX1	1.03054	0.164	0.043	1.95178e-163	4.1085e-159	0
TMEM71	1.02971	0.249	0.1	1.81169e-166	3.81362e-162	0
MAP3K3	1.01732	0.384	0.212	1.72861e-197	3.63873e-193	0
SSH2	1.01632	0.556	0.345	0	0	0
TNFAIP2	1.00865	0.749	0.52	0	0	0
CCR2	1.00535	0.304	0.119	7.00499e-210	1.47455e-205	0
AC020656.1	1.00168	0.547	0.332	3.56856e-267	7.51183e-263	0
ADD3	0.999857	0.429	0.253	4.65846e-206	9.80607e-202	0
FLNA	0.997771	0.842	0.592	0	0	0
C5AR1	0.997334	0.799	0.551	0	0	0
MYO1G	0.983167	0.61	0.402	0	0	0
CD48	0.972701	0.874	0.583	0	0	0
KIAA0513	0.963142	0.229	0.091	3.9303e-152	8.27328e-148	0
CPD	0.963042	0.375	0.234	3.2096e-146	6.75621e-142	0
C11orf21	0.957191	0.177	0.059	4.29848e-141	9.0483e-137	0
DMXL2	0.955826	0.67	0.417	0	0	0
CRIP1	0.953683	0.615	0.479	7.20214e-194	1.51605e-189	0
FCAR	0.950755	0.101	0.011	3.32907e-164	7.00769e-160	0
TLR8	0.94794	0.343	0.192	1.17867e-155	2.48109e-151	0
MSRB1	0.944982	0.381	0.264	1.93438e-124	4.07187e-120	0
CD52	0.944146	0.836	0.601	0	0	0
SULT1A1	0.94331	0.5	0.334	1.20528e-214	2.53711e-210	0
NLRP12	0.943277	0.126	0.029	7.24236e-138	1.52452e-133	0
CCNY	0.940401	0.485	0.329	1.72694e-210	3.63521e-206	0
VCL	0.93995	0.303	0.167	1.16468e-132	2.45165e-128	0
ARMH1	0.930417	0.181	0.07	8.70992e-119	1.83344e-114	0
LILRA2	0.924775	0.428	0.241	3.7663e-217	7.92806e-213	0
ABTB1	0.924312	0.327	0.208	1.13569e-112	2.39062e-108	0
USP3	0.920448	0.57	0.397	8.54642e-279	1.79902e-274	0
ADGRE5	0.917097	0.687	0.529	0	0	0
TBL1X	0.91628	0.242	0.122	6.81788e-112	1.43516e-107	0
NLRP3	0.915364	0.577	0.406	2.86998e-216	6.04131e-212	0
IL17RA	0.914696	0.531	0.363	2.2586e-234	4.75435e-230	0
AP1S2	0.914627	0.904	0.747	0	0	0
AC096667.1	0.907944	0.286	0.161	3.21744e-116	6.77272e-112	0
RASGRP4	0.905622	0.247	0.117	1.63247e-129	3.43635e-125	0
LINC01001	0.904517	0.13	0.05	9.87072e-81	2.07779e-76	0
CD300LB	0.903451	0.227	0.108	4.49497e-113	9.46191e-109	0
SLCO3A1	0.90321	0.392	0.247	2.05173e-153	4.3189e-149	0
ASGR1	0.901157	0.531	0.316	1.63029e-270	3.43176e-266	0
LINC00877	0.899153	0.159	0.059	3.60982e-107	7.59867e-103	0
LRG1	0.898354	0.12	0.04	1.74817e-87	3.6799e-83	0
AL445524.1	0.896371	0.177	0.094	8.61324e-68	1.81309e-63	0
ADAP1	0.893226	0.293	0.166	1.74829e-118	3.68016e-114	0
LTA4H	0.890152	0.642	0.453	0	0	0
HRH2	0.886763	0.405	0.245	3.49652e-171	7.36017e-167	0
KBTBD11	0.886036	0.113	0.027	4.28109e-118	9.01169e-114	0
SIRPB1	0.885837	0.321	0.186	7.24649e-130	1.52539e-125	0
S1PR4	0.885777	0.27	0.147	8.61353e-116	1.81315e-111	0
ADGRE1	0.88485	0.129	0.041	3.44913e-103	7.26041e-99	0
UBE2R2	0.88384	0.682	0.522	0	0	0
RASSF2	0.881747	0.526	0.356	1.42624e-232	3.00224e-228	0
ULK1	0.880561	0.181	0.086	2.34978e-86	4.94629e-82	0
RASGRP2	0.879172	0.351	0.206	2.0677e-146	4.35252e-142	0
NBPF14	0.876618	0.342	0.212	7.89055e-127	1.66096e-122	0
LILRA6	0.876002	0.229	0.117	2.59991e-101	5.47281e-97	0
STK38	0.875802	0.331	0.21	1.35913e-115	2.86096e-111	0
LYZ	0.875794	0.999	0.951	0	0	0
SMAP2	0.874247	0.864	0.696	0	0	0
PXN	0.873775	0.296	0.184	1.88792e-99	3.97406e-95	0
NLRP1	0.866131	0.297	0.166	1.07532e-121	2.26354e-117	0
CES1	0.865256	0.109	0.027	2.76838e-106	5.82744e-102	0
PLAGL2	0.862544	0.154	0.069	3.50877e-77	7.38595e-73	0
USP15	0.861441	0.728	0.604	0	0	0
RXRA	0.859947	0.5	0.333	2.1539e-210	4.53395e-206	0
ATG16L2	0.859396	0.426	0.287	9.41269e-156	1.98137e-151	0
GABBR1	0.859359	0.184	0.079	3.93192e-103	8.27669e-99	0
AMPD2	0.85873	0.413	0.278	2.28006e-143	4.79953e-139	0
PTGIR	0.856833	0.132	0.034	1.42516e-128	2.99996e-124	0
CARS2	0.855097	0.379	0.278	1.68916e-106	3.55567e-102	0
MYO1F	0.852433	0.757	0.618	0	0	0
TMEM91	0.850849	0.217	0.122	6.42029e-78	1.35147e-73	0
SULT1B1	0.85043	0.111	0.033	3.27466e-93	6.89317e-89	0
SLC46A2	0.848857	0.104	0.019	2.70357e-128	5.69101e-124	0
SLC36A4	0.848335	0.334	0.215	3.3763e-108	7.10711e-104	0
LILRB3	0.846582	0.643	0.466	2.41973e-307	5.09352e-303	0
VSIR	0.844723	0.874	0.712	0	0	0
RAB24	0.843732	0.285	0.157	4.48315e-118	9.43704e-114	0
HIPK3	0.842877	0.555	0.409	4.97798e-224	1.04786e-219	0
RRP12	0.842218	0.196	0.103	9.71783e-78	2.0456e-73	0
TUT7	0.84047	0.49	0.351	4.51986e-175	9.51431e-171	0
SLC16A7	0.83454	0.172	0.077	9.95274e-89	2.09505e-84	0
JAK3	0.832516	0.235	0.136	2.91439e-80	6.13479e-76	0
SLC44A2	0.829813	0.139	0.053	1.6545e-89	3.48273e-85	0
BCL3	0.827005	0.33	0.233	2.42923e-82	5.11353e-78	0
TNFSF10	0.825785	0.591	0.449	8.66108e-208	1.82316e-203	0
SPTLC2	0.825621	0.498	0.375	2.2101e-164	4.65226e-160	0
SECTM1	0.814778	0.478	0.305	9.8885e-198	2.08153e-193	0
B4GALT5	0.814463	0.305	0.209	6.44464e-80	1.3566e-75	0
CAPN2	0.809838	0.497	0.372	2.17467e-163	4.57767e-159	0
MAP4K4	0.80841	0.325	0.214	3.53286e-96	7.43668e-92	0
PTK2B	0.807676	0.492	0.353	1.66571e-167	3.50632e-163	0
NFIL3	0.806826	0.508	0.388	2.99833e-142	6.31148e-138	0
PID1	0.805957	0.261	0.116	2.32528e-140	4.89472e-136	0
NADK	0.805869	0.429	0.308	4.49261e-136	9.45695e-132	0
ARL4A	0.804815	0.508	0.4	1.28841e-126	2.7121e-122	0
SOCS3	0.802156	0.692	0.596	1.02793e-157	2.16379e-153	0
ZDHHC1	0.798787	0.101	0.023	1.18229e-106	2.48873e-102	0
PPM1F	0.797224	0.277	0.172	2.0973e-88	4.41481e-84	0
MAP2K3	0.796403	0.528	0.396	4.27852e-176	9.00628e-172	0
EVI2B	0.794979	0.87	0.786	0	0	0
IQSEC1	0.792299	0.37	0.253	1.14315e-112	2.40633e-108	0
SMCHD1	0.792137	0.628	0.526	3.37925e-203	7.11333e-199	0
SERPINA1	0.791816	0.977	0.795	0	0	0
AHNAK	0.791505	0.812	0.695	0	0	0
GIMAP8	0.791007	0.274	0.158	7.20888e-98	1.51747e-93	0
FAM200B	0.790814	0.413	0.323	2.64712e-101	5.57218e-97	0
G6PD	0.790696	0.393	0.295	2.38423e-103	5.01879e-99	0
SPATA13	0.789736	0.249	0.165	1.24226e-61	2.61495e-57	0
KLHL8	0.789293	0.286	0.184	5.2499e-85	1.1051e-80	0
HCAR3	0.787764	0.108	0.044	3.16352e-59	6.65922e-55	0
TCF7L2	0.785901	0.293	0.201	3.30937e-68	6.96622e-64	0
ABHD5	0.785437	0.475	0.331	5.73337e-143	1.20687e-138	0
FAM117B	0.783766	0.241	0.127	1.98676e-99	4.18213e-95	0
PNPLA2	0.781619	0.337	0.234	1.64114e-92	3.45461e-88	0
TMEM131L	0.78159	0.208	0.113	3.73918e-76	7.87097e-72	0
MTF1	0.780121	0.172	0.099	1.66429e-53	3.50334e-49	0
ITGAL	0.779707	0.398	0.283	5.49931e-115	1.1576e-110	0
ARHGAP26	0.778472	0.476	0.358	5.71807e-140	1.20365e-135	0
MTMR3	0.777891	0.233	0.151	1.99975e-60	4.20948e-56	0
FRY	0.775571	0.16	0.075	4.24823e-74	8.94252e-70	0
NCF2	0.77428	0.826	0.667	0	0	0
CDH23	0.772503	0.135	0.048	7.50837e-93	1.58051e-88	0
TRAF3IP3	0.772391	0.363	0.249	8.3335e-102	1.7542e-97	0
RNF24	0.770687	0.192	0.121	1.20813e-48	2.54312e-44	0
CHP1	0.770213	0.555	0.44	3.55081e-186	7.47444e-182	0
DPYD	0.769909	0.625	0.485	7.49938e-238	1.57862e-233	0
DUSP1	0.769342	0.983	0.957	0	0	0
44448	0.768184	0.579	0.463	7.30602e-205	1.53792e-200	0
STK10	0.768119	0.432	0.315	4.26152e-128	8.9705e-124	0
HLX	0.767471	0.193	0.139	1.58467e-32	3.33573e-28	0
IL27RA	0.767365	0.291	0.18	1.22431e-92	2.57717e-88	0
MIDN	0.766897	0.598	0.479	4.37319e-179	9.20557e-175	0
ZNF467	0.766694	0.301	0.2	4.25766e-84	8.96237e-80	0
IFITM2	0.763652	0.854	0.741	0	0	0
MNDA	0.760962	0.961	0.884	0	0	0
LTB4R	0.760765	0.283	0.202	5.98046e-61	1.25889e-56	0
CCDC88B	0.756555	0.353	0.256	5.23752e-84	1.1025e-79	0
GLIPR2	0.75417	0.685	0.527	7.02101e-293	1.47792e-288	0
KIAA0319L	0.754025	0.265	0.201	5.65753e-47	1.19091e-42	0
FRAT1	0.753603	0.213	0.128	9.23078e-60	1.94308e-55	0
AGFG1	0.752868	0.52	0.423	1.14175e-139	2.40339e-135	0
LGALS2	0.751015	0.735	0.337	0	0	0
BACH1	0.749693	0.582	0.462	9.99315e-188	2.10356e-183	0
KLF2	0.74938	0.702	0.484	7.54217e-305	1.58763e-300	0
SLC16A6	0.748499	0.183	0.098	7.6199e-65	1.60399e-60	0
ID1	0.747886	0.144	0.08	1.58295e-43	3.33212e-39	0
PSTPIP1	0.744438	0.446	0.36	8.1039e-103	1.70587e-98	0
GRK6	0.738036	0.295	0.222	1.49812e-57	3.15355e-53	0
SMAD3	0.737652	0.151	0.075	3.20162e-63	6.73942e-59	0
SLC2A3	0.735885	0.758	0.677	7.23959e-168	1.52393e-163	0
SLC7A7	0.735122	0.719	0.548	0	0	0
ZNF281	0.733919	0.283	0.22	1.72955e-43	3.64071e-39	0
RAP1GAP2	0.733816	0.122	0.051	3.78451e-67	7.96639e-63	0
PGD	0.73329	0.55	0.464	9.04268e-133	1.90348e-128	0
ZEB2	0.733146	0.882	0.757	0	0	0
HK3	0.730471	0.3	0.203	1.89077e-73	3.98008e-69	0
PPP2R5A	0.727354	0.283	0.209	6.04125e-56	1.27168e-51	0
MBOAT7	0.725874	0.501	0.406	2.41817e-126	5.09024e-122	0
SLC9A3R1	0.725851	0.228	0.153	5.66764e-52	1.19304e-47	0
CD244	0.724686	0.133	0.054	5.06686e-75	1.06657e-70	0
CARD16	0.723589	0.841	0.72	0	0	0
PTGS2	0.722586	0.401	0.264	1.39344e-95	2.93318e-91	0
TRIM25	0.72224	0.245	0.178	2.09378e-44	4.40741e-40	0
CSGALNACT2	0.722184	0.506	0.418	3.06456e-122	6.45091e-118	0
UBE2D1	0.719489	0.621	0.524	5.1593e-193	1.08603e-188	0
BIRC3	0.718555	0.467	0.251	2.75552e-230	5.80038e-226	0
DPEP2	0.716284	0.213	0.13	1.13438e-60	2.38786e-56	0
SOD2	0.714249	0.887	0.754	0	0	0
JAML	0.714167	0.819	0.549	0	0	0
LINC02207	0.710756	0.126	0.062	1.35894e-50	2.86056e-46	0
PECAM1	0.708744	0.657	0.544	3.83707e-213	8.07704e-209	0
RNF144B	0.707912	0.579	0.481	9.0634e-147	1.90785e-142	0
RARA	0.707454	0.399	0.307	4.91695e-87	1.03502e-82	0
MAST3	0.706218	0.165	0.098	8.31937e-47	1.75123e-42	0
SLC25A37	0.705451	0.564	0.42	1.43846e-177	3.02796e-173	0
ZFP36	0.702868	0.964	0.92	0	0	0
BCL6	0.702233	0.414	0.303	8.41202e-102	1.77073e-97	0
YBX3	0.701543	0.757	0.656	6.44131e-278	1.35589e-273	0
AOAH	0.70129	0.608	0.468	1.78908e-215	3.76602e-211	0
FOS	0.698612	0.975	0.928	0	0	0
CAST	0.698303	0.843	0.759	0	0	0
OAF	0.698222	0.155	0.082	6.66753e-57	1.40352e-52	0
MOB3A	0.697775	0.378	0.297	2.96139e-75	6.23373e-71	0
MAP3K1	0.696671	0.522	0.429	4.74361e-128	9.98529e-124	0
KCNJ2	0.695219	0.13	0.065	1.02014e-49	2.1474e-45	0
PABPC1	0.694669	0.989	0.96	0	0	0
S100A4	0.693907	0.995	0.927	0	0	0
NUMB	0.690901	0.568	0.473	8.49649e-156	1.78851e-151	0
CASP1	0.688937	0.79	0.653	0	0	0
YPEL3	0.688574	0.568	0.456	3.83599e-160	8.07477e-156	0
CLMN	0.687665	0.17	0.103	2.77807e-45	5.84784e-41	0
ICAM3	0.687188	0.538	0.366	1.21323e-175	2.55385e-171	0
PTPRE	0.686483	0.779	0.605	0	0	0
AC007952.4	0.685544	0.503	0.403	1.12776e-94	2.37394e-90	0
CHD1	0.684756	0.63	0.528	5.37606e-178	1.13166e-173	0
INSR	0.683739	0.26	0.149	2.20654e-87	4.64476e-83	0
SNX27	0.683233	0.483	0.397	2.48645e-112	5.23397e-108	0
P2RY8	0.683217	0.136	0.063	1.04919e-62	2.20854e-58	0
LCP1	0.682975	0.976	0.928	0	0	0
MAPK7	0.682816	0.137	0.079	2.31378e-40	4.87051e-36	0
METTL7A	0.681119	0.497	0.386	4.99801e-128	1.05208e-123	0
LST1	0.681108	0.979	0.915	0	0	0
MAP3K20	0.680601	0.284	0.197	4.73338e-63	9.96376e-59	0
TUBA4A	0.680231	0.209	0.122	1.17371e-64	2.47066e-60	0
GCA	0.680194	0.758	0.658	2.11249e-249	4.44679e-245	0
COTL1	0.680016	0.993	0.948	0	0	0
LPCAT1	0.679947	0.299	0.222	9.52653e-55	2.00534e-50	0
SH3BP2	0.679449	0.528	0.444	9.79959e-123	2.06281e-118	0
RPS4Y1	0.678664	0.403	0.219	6.46079e-148	1.36e-143	0
RGS2	0.678266	0.856	0.751	3.27963e-246	6.90363e-242	0
RCSD1	0.67669	0.486	0.4	1.24707e-110	2.62508e-106	0
STAT6	0.676121	0.456	0.365	1.04806e-105	2.20617e-101	0
NLRC4	0.674787	0.202	0.135	1.29036e-43	2.7162e-39	0
IL6R	0.674461	0.397	0.322	3.88517e-71	8.17828e-67	0
SULF2	0.674349	0.403	0.268	1.53228e-117	3.22545e-113	0
SIK3	0.673671	0.269	0.201	8.66408e-48	1.82379e-43	0
BIN2	0.671757	0.422	0.348	1.38694e-80	2.91951e-76	0
RILPL2	0.671681	0.709	0.596	1.13132e-236	2.38142e-232	0
FAM198B	0.6705	0.396	0.278	4.33691e-96	9.12919e-92	0
CSRNP1	0.670268	0.448	0.364	5.17923e-82	1.09023e-77	0
CTDSP1	0.667811	0.423	0.355	1.05948e-77	2.2302e-73	0
TES	0.666668	0.5	0.411	1.47996e-107	3.11531e-103	0
PLBD1	0.666092	0.573	0.56	9.09683e-73	1.91488e-68	0
RNF141	0.665865	0.323	0.266	2.75653e-48	5.8025e-44	0
PPIF	0.665118	0.497	0.488	2.00731e-37	4.22538e-33	0
FGD3	0.6642	0.229	0.165	1.50619e-41	3.17052e-37	0
FRAT2	0.664123	0.276	0.221	9.65338e-38	2.03204e-33	0
ADA2	0.663553	0.771	0.664	0	0	0
CD1D	0.663528	0.427	0.277	5.11398e-132	1.07649e-127	0
LIMD2	0.663372	0.749	0.526	0	0	0
ZBTB7A	0.661448	0.441	0.388	2.22113e-70	4.67548e-66	0
MX2	0.660539	0.502	0.415	6.34828e-96	1.33631e-91	0
FYB1	0.659086	0.9	0.802	0	0	0
TET3	0.657619	0.304	0.219	3.16321e-64	6.65855e-60	0
SYNE3	0.654544	0.19	0.126	1.94429e-40	4.09274e-36	0
ZDHHC7	0.654288	0.334	0.259	3.39764e-62	7.15203e-58	0
JAK2	0.653976	0.404	0.326	1.92252e-74	4.04691e-70	0
UBE2J1	0.653866	0.438	0.382	6.8912e-71	1.4506e-66	0
GPCPD1	0.653709	0.609	0.508	2.90181e-157	6.10832e-153	0
JUNB	0.651153	0.969	0.917	0	0	0
ACAP2	0.649982	0.663	0.616	2.70157e-170	5.68681e-166	0
FOSL2	0.649542	0.632	0.526	8.33461e-147	1.75444e-142	0
STK17B	0.648697	0.781	0.637	2.20301e-305	4.63733e-301	0
KLF13	0.647613	0.32	0.237	2.33191e-63	4.90867e-59	0
MYD88	0.647457	0.523	0.443	7.44338e-118	1.56683e-113	0
MAN2A2	0.64694	0.19	0.131	2.49562e-36	5.25328e-32	0
ZDHHC20	0.645614	0.478	0.376	2.29401e-110	4.8289e-106	0
GRK2	0.643896	0.651	0.578	3.58345e-182	7.54316e-178	0
CFD	0.642619	0.788	0.48	0	0	0
SERPINB1	0.642114	0.86	0.819	5.52778e-300	1.1636e-295	0
GIMAP1	0.641208	0.449	0.347	1.93749e-100	4.07842e-96	0
LENG8	0.640134	0.51	0.44	9.29563e-101	1.95673e-96	0
NCOA2	0.63981	0.263	0.197	1.21628e-44	2.56027e-40	0
SMIM25	0.639775	0.624	0.435	1.00692e-202	2.11957e-198	0
CELF1	0.639276	0.513	0.464	1.93394e-81	4.07095e-77	0
POLE4	0.637749	0.594	0.517	6.22795e-149	1.31098e-144	0
NCOA1	0.637022	0.306	0.247	3.21514e-44	6.76788e-40	0
ALDH1A1	0.636634	0.237	0.166	3.467e-43	7.29804e-39	0
SAMSN1	0.636487	0.687	0.643	1.54263e-89	3.24723e-85	0
ICAM2	0.634584	0.285	0.213	4.88816e-51	1.02896e-46	0
KCNE1	0.633675	0.157	0.08	4.75992e-59	1.00196e-54	0
FAM49A	0.633125	0.52	0.421	2.09782e-121	4.41592e-117	0
IRF1	0.632747	0.548	0.457	6.02205e-99	1.26764e-94	0
LYN	0.63137	0.797	0.754	3.22578e-278	6.79026e-274	0
FKBP5	0.63136	0.717	0.666	1.2261e-178	2.58093e-174	0
CCND3	0.630317	0.53	0.437	3.10313e-117	6.53208e-113	0
SP1	0.629311	0.339	0.274	2.19208e-52	4.61433e-48	0
C9orf72	0.629218	0.569	0.489	1.83282e-128	3.85809e-124	0
DAZAP2	0.629126	0.867	0.783	0	0	0
DYSF	0.628763	0.136	0.099	4.35559e-19	9.16851e-15	0
HCK	0.626228	0.713	0.642	4.21267e-216	8.86767e-212	0
ADGRE2	0.625715	0.408	0.328	9.71438e-73	2.04488e-68	0
NFKB2	0.625694	0.296	0.223	1.83589e-50	3.86454e-46	0
STX11	0.624273	0.521	0.428	1.79797e-117	3.78472e-113	0
KLF7	0.624033	0.298	0.234	1.87132e-44	3.93913e-40	0
PTP4A2	0.623946	0.867	0.807	0	0	0
FGL2	0.622075	0.96	0.879	0	0	0
ZNF703	0.621778	0.127	0.077	1.02871e-29	2.16543e-25	0
RYBP	0.620324	0.395	0.317	4.18694e-67	8.81351e-63	0
EHBP1L1	0.619652	0.622	0.549	1.36141e-152	2.86577e-148	0
TSPAN32	0.619278	0.14	0.078	5.91151e-43	1.24437e-38	0
MCL1	0.615154	0.952	0.927	0	0	0
PTPRC	0.613787	0.978	0.962	0	0	0
RASSF5	0.613769	0.472	0.387	2.30053e-94	4.84261e-90	0
ATP2B1	0.613228	0.63	0.604	2.99115e-86	6.29637e-82	0
CD44	0.613131	0.933	0.835	0	0	0
DICER1	0.612705	0.543	0.467	3.19645e-109	6.72852e-105	0
STK26	0.612309	0.141	0.089	2.82779e-32	5.95249e-28	0
AKNA	0.612066	0.395	0.318	1.44811e-70	3.04827e-66	0
GRK3	0.609956	0.463	0.411	1.65278e-72	3.47911e-68	0
JDP2	0.608856	0.487	0.445	8.78005e-63	1.8482e-58	0
KSR1	0.60792	0.157	0.094	8.8976e-41	1.87294e-36	0
MYADM	0.606136	0.587	0.527	1.77816e-102	3.74303e-98	0
CPT1A	0.60547	0.238	0.182	5.52109e-35	1.16219e-30	0
GIMAP2	0.604287	0.34	0.275	3.15518e-52	6.64165e-48	0
WAC	0.601324	0.609	0.571	7.05188e-125	1.48442e-120	0
AC015912.3	0.600856	0.199	0.142	5.19234e-30	1.09299e-25	0
ANKRD13A	0.600562	0.289	0.241	1.37134e-34	2.88668e-30	0
HEBP2	0.600329	0.503	0.463	8.34345e-80	1.7563e-75	0
CREB5	0.600281	0.377	0.316	1.87646e-47	3.94995e-43	0
AGO4	0.598605	0.29	0.233	3.19246e-40	6.72013e-36	0
CD302	0.598539	0.702	0.613	9.48808e-202	1.99724e-197	0
SYTL1	0.597783	0.142	0.089	4.31537e-32	9.08386e-28	0
NEAT1	0.59728	0.997	0.99	0	0	0
PHF21A	0.595432	0.257	0.208	3.10591e-30	6.53793e-26	0
CALCOCO2	0.595198	0.453	0.381	2.23145e-83	4.69719e-79	0
QPCT	0.594731	0.284	0.223	2.05312e-38	4.32181e-34	0
ARID3A	0.593087	0.218	0.174	9.33953e-25	1.96597e-20	0
KDM6B	0.591875	0.56	0.412	1.51149e-147	3.18169e-143	0
ATP11A	0.591468	0.326	0.268	4.36966e-44	9.19813e-40	0
S100A6	0.590091	0.997	0.967	0	0	0
EIF4EBP2	0.590051	0.357	0.312	6.87149e-43	1.44645e-38	0
ARAP1	0.589945	0.489	0.413	1.57372e-90	3.31269e-86	0
ALDH3B1	0.588262	0.295	0.238	6.27083e-40	1.32001e-35	0
HECA	0.587574	0.358	0.299	4.69919e-48	9.8918e-44	0
FLI1	0.586778	0.402	0.351	1.80296e-56	3.79523e-52	0
MAPK14	0.585852	0.335	0.308	8.8364e-30	1.86006e-25	0
VIM-AS1	0.583622	0.132	0.089	1.20277e-23	2.53183e-19	0
SH3BGRL3	0.583046	0.996	0.976	0	0	0
MICAL2	0.582904	0.159	0.106	1.69614e-31	3.57038e-27	0
ARL5B	0.582669	0.273	0.229	2.66378e-24	5.60726e-20	0
SAMD4A	0.582442	0.151	0.098	1.60708e-30	3.3829e-26	0
KDM1B	0.581431	0.253	0.203	5.9998e-32	1.26296e-27	0
ZNF516	0.580943	0.172	0.126	1.66487e-24	3.50456e-20	0
TTC7A	0.580767	0.271	0.23	4.07455e-28	8.57693e-24	0
PIK3CD	0.580547	0.23	0.185	3.19372e-26	6.72279e-22	0
NFKBIZ	0.578539	0.653	0.529	9.23002e-153	1.94292e-148	0
MED13L	0.576154	0.444	0.369	7.96479e-76	1.67659e-71	0
GLTP	0.576122	0.35	0.313	2.65712e-37	5.59325e-33	0
PYGL	0.575408	0.369	0.318	2.02323e-40	4.2589e-36	0
HOTAIRM1	0.575258	0.287	0.229	1.62283e-38	3.41605e-34	0
MARK2	0.574635	0.325	0.278	3.64503e-38	7.67279e-34	0
GAB2	0.573235	0.206	0.15	4.7794e-32	1.00606e-27	0
DIAPH2	0.572299	0.313	0.274	4.14907e-29	8.73379e-25	0
TMX4	0.569836	0.307	0.289	1.98063e-18	4.16922e-14	0
EEF2	0.569423	0.913	0.875	0	0	0
ODF3B	0.569033	0.485	0.434	7.23041e-72	1.522e-67	0
GPSM3	0.568783	0.853	0.801	0	0	0
KYNU	0.568181	0.495	0.453	4.35276e-65	9.16255e-61	0
CD93	0.5667	0.744	0.619	9.75895e-193	2.05426e-188	0
TNIP1	0.566668	0.332	0.322	4.60973e-20	9.70348e-16	0
NFKBIA	0.565857	0.901	0.849	1.92766e-239	4.05773e-235	0
NBPF26	0.564086	0.102	0.045	2.38122e-49	5.01248e-45	0
SNHG25	0.563269	0.357	0.311	4.55105e-38	9.57996e-34	0
SERP1	0.560466	0.951	0.92	0	0	0
TNFSF13B	0.560257	0.832	0.744	9.86706e-264	2.07702e-259	0
ADAM17	0.55911	0.452	0.412	8.7673e-56	1.84552e-51	0
CREBBP	0.558046	0.354	0.311	7.74099e-40	1.62948e-35	0
UTRN	0.557986	0.513	0.47	3.16519e-74	6.66273e-70	0
EVI2A	0.557879	0.629	0.606	3.97903e-106	8.37587e-102	0
SH2D3C	0.556989	0.118	0.076	4.20946e-24	8.8609e-20	0
WWC3	0.555281	0.108	0.069	3.50068e-22	7.36892e-18	0
RNF44	0.554553	0.265	0.216	1.29786e-30	2.73199e-26	0
S100Z	0.553491	0.119	0.077	1.46498e-23	3.08378e-19	0
PPP1R9B	0.553137	0.341	0.305	3.72279e-33	7.83648e-29	0
RGS18	0.553074	0.592	0.505	1.4876e-116	3.1314e-112	0
PELI1	0.552564	0.406	0.334	4.89566e-58	1.03054e-53	0
GGA3	0.552203	0.233	0.199	5.71919e-20	1.20389e-15	0
SNRK	0.552109	0.239	0.192	8.97281e-27	1.88878e-22	0
IPCEF1	0.551982	0.146	0.097	5.21925e-27	1.09865e-22	0
STAT2	0.551765	0.532	0.488	1.00615e-78	2.11795e-74	0
IL15	0.550995	0.215	0.171	6.50173e-24	1.36861e-19	0
SLC12A6	0.550982	0.269	0.227	1.10159e-26	2.31884e-22	0
G0S2	0.549278	0.428	0.344	5.96158e-51	1.25491e-46	0
FAM120A	0.549038	0.621	0.583	5.3111e-122	1.11799e-117	0
PLP2	0.548922	0.57	0.519	1.95136e-98	4.10761e-94	0
TLE4	0.54891	0.462	0.385	1.89785e-73	3.99497e-69	0
NOD2	0.548699	0.193	0.151	3.71578e-22	7.82171e-18	0
GIMAP7	0.548588	0.352	0.288	3.08201e-43	6.48762e-39	0
ZNF316	0.547428	0.133	0.092	1.00037e-21	2.10578e-17	0
CEBPB	0.547003	0.965	0.888	0	0	0
MIR22HG	0.54524	0.245	0.196	9.45504e-27	1.99029e-22	0
SLC43A2	0.54299	0.536	0.481	1.52315e-77	3.20622e-73	0
TOM1	0.542791	0.357	0.299	1.30522e-44	2.74748e-40	0
CCDC159	0.542599	0.171	0.132	7.60502e-20	1.60086e-15	0
TMPO	0.54238	0.484	0.403	3.7825e-80	7.96217e-76	0
AC012368.1	0.542332	0.116	0.064	5.75623e-35	1.21169e-30	0
LPAR2	0.542271	0.112	0.08	1.20198e-15	2.53017e-11	0
C16orf54	0.541332	0.155	0.114	3.4876e-21	7.3414e-17	0
PIGX	0.541232	0.166	0.138	3.21736e-13	6.77255e-09	0
JARID2	0.541017	0.441	0.39	4.36711e-56	9.19276e-52	0
MXD1	0.540974	0.631	0.549	2.65411e-105	5.5869e-101	0
RHOQ	0.540841	0.514	0.472	6.53882e-73	1.37642e-68	0
FGD4	0.539945	0.514	0.469	3.49978e-67	7.36703e-63	0
SVIL	0.538693	0.13	0.086	4.76548e-24	1.00313e-19	0
ARRB2	0.538444	0.814	0.752	1.56446e-265	3.29318e-261	0
KLF10	0.538328	0.456	0.411	8.3198e-48	1.75132e-43	0
CYBB	0.538057	0.95	0.8	0	0	0
DOK3	0.537614	0.347	0.3	1.49218e-35	3.14104e-31	0
ERBIN	0.536033	0.465	0.43	1.29796e-55	2.7322e-51	0
DENND1A	0.535841	0.227	0.194	8.32169e-19	1.75171e-14	0
FLOT2	0.535817	0.355	0.357	2.31795e-18	4.87929e-14	0
LILRB1	0.535432	0.405	0.369	8.1599e-40	1.71766e-35	0
ARRB1	0.534704	0.294	0.266	4.24774e-23	8.94149e-19	0
TRIQK	0.534205	0.192	0.156	1.52296e-18	3.20583e-14	0
IKBKE	0.533442	0.171	0.134	1.96737e-18	4.14132e-14	0
TALDO1	0.532949	0.829	0.798	1.76483e-240	3.71497e-236	0
SIGLEC14	0.532663	0.197	0.151	1.02448e-23	2.15653e-19	0
HPSE	0.532035	0.259	0.205	2.767e-31	5.82454e-27	0
DIAPH1	0.531859	0.456	0.42	3.7713e-56	7.93859e-52	0
SNHG9	0.531794	0.253	0.221	8.46404e-20	1.78168e-15	0
SHKBP1	0.531007	0.515	0.492	1.51109e-68	3.18083e-64	0
OSCAR	0.530711	0.484	0.429	1.44235e-64	3.03614e-60	0
PARP8	0.530236	0.257	0.228	3.40065e-19	7.15838e-15	0
IMPA2	0.52824	0.282	0.24	7.40529e-27	1.55881e-22	0
TRMT1	0.528104	0.429	0.405	2.45617e-40	5.17024e-36	0
ERICH1	0.527918	0.424	0.383	2.52016e-50	5.30493e-46	0
NDEL1	0.527845	0.262	0.241	6.68028e-15	1.4062e-10	0
SASH3	0.527786	0.362	0.336	5.67035e-32	1.19361e-27	0
ARID1A	0.52759	0.5	0.476	4.10162e-60	8.63392e-56	0
WASHC2C	0.525247	0.289	0.25	6.69412e-27	1.40911e-22	0
SLC11A1	0.523982	0.833	0.571	4.48766e-274	9.44653e-270	0
DGKD	0.522815	0.183	0.147	1.5542e-17	3.27159e-13	0
TNFAIP3	0.522178	0.694	0.567	2.17521e-159	4.57882e-155	0
TM9SF4	0.521883	0.244	0.212	1.70056e-19	3.57969e-15	0
SLC27A3	0.52151	0.229	0.193	1.55595e-20	3.27528e-16	0
RNF149	0.521419	0.793	0.736	3.09771e-197	6.52067e-193	0
MAPK1	0.521156	0.511	0.5	1.35262e-58	2.84726e-54	0
CSF2RB	0.520539	0.311	0.275	3.98213e-27	8.38238e-23	0
C16orf72	0.520289	0.46	0.428	3.15588e-49	6.64313e-45	0
ZBTB7B	0.519398	0.207	0.185	4.14224e-12	8.71942e-08	0
CCR1	0.518763	0.489	0.429	9.30599e-56	1.95891e-51	0
PAG1	0.518198	0.403	0.383	1.91817e-27	4.03774e-23	0
SLC22A15	0.517468	0.118	0.079	2.51296e-20	5.28978e-16	0
GNG2	0.517375	0.291	0.263	1.45473e-20	3.0622e-16	0
CHSY1	0.517375	0.219	0.192	1.39538e-14	2.93728e-10	0
RAC2	0.517056	0.747	0.662	4.83869e-192	1.01854e-187	0
IER2	0.516192	0.863	0.767	2.90587e-158	6.11685e-154	0
EIF1	0.516171	0.998	0.994	0	0	0
FBXW7	0.515447	0.255	0.222	9.40273e-21	1.97928e-16	0
HIPK2	0.51509	0.305	0.266	6.59021e-27	1.38724e-22	0
SRGAP2B	0.515047	0.34	0.302	2.26592e-30	4.76975e-26	0
PHF20L1	0.514711	0.437	0.422	2.55001e-36	5.36778e-32	0
EGR1	0.512754	0.357	0.37	0.000140737	1	0
USP25	0.512342	0.277	0.246	2.23493e-21	4.70452e-17	0
RNF19B	0.512167	0.273	0.251	3.48231e-15	7.33026e-11	0
NIN	0.512103	0.424	0.397	2.73039e-41	5.74748e-37	0
PRKACA	0.511918	0.422	0.393	1.56605e-42	3.29653e-38	0
OGT	0.509113	0.352	0.322	7.68018e-29	1.61668e-24	0
AC004687.1	0.509035	0.404	0.367	2.33472e-32	4.9146e-28	0
ABCA7	0.508007	0.148	0.122	9.5466e-12	2.00956e-07	0
RALGAPA2	0.507795	0.14	0.101	1.95976e-19	4.1253e-15	0
GK	0.50662	0.43	0.419	1.24444e-23	2.61954e-19	0
RPL7	0.506218	0.976	0.944	0	0	0
E2F3	0.50617	0.241	0.211	4.96407e-18	1.04494e-13	0
UBR4	0.505982	0.29	0.282	1.72047e-13	3.6216e-09	0
SCLT1	0.505744	0.263	0.224	5.08951e-24	1.07134e-19	0
NBPF15	0.504887	0.107	0.066	1.275e-23	2.68387e-19	0
PLAC8	0.503193	0.521	0.299	2.6371e-192	5.55109e-188	0
GBP2	0.502473	0.464	0.42	1.81151e-49	3.81324e-45	0
ARAP2	0.501823	0.226	0.194	8.52373e-16	1.79425e-11	0
R3HDM4	0.501443	0.315	0.307	1.14752e-15	2.41554e-11	0
NOTCH2NL	0.500565	0.126	0.079	1.05121e-26	2.21279e-22	0
SPOPL	0.500385	0.307	0.282	8.48964e-21	1.78707e-16	0
NEDD9	0.500036	0.276	0.231	1.23273e-24	2.5949e-20	0
HTRA1	2.6702	0.439	0.053	0	0	1
C3	2.14618	0.636	0.148	0	0	1
OLFML3	1.97244	0.363	0.04	0	0	1
APOC1	1.90782	0.783	0.328	0	0	1
CD9	1.8699	0.815	0.278	0	0	1
INHBA	1.83151	0.105	0.018	4.93257e-136	1.03831e-131	1
CCL3L1	1.8314	0.548	0.24	0	0	1
CCL4L2	1.7965	0.526	0.249	7.68837e-307	1.6184e-302	1
SPP1	1.77607	0.753	0.297	0	0	1
IL1A	1.71121	0.122	0.015	2.73575e-192	5.75875e-188	1
SDS	1.67699	0.515	0.137	0	0	1
CCL4	1.64805	0.631	0.445	2.19333e-194	4.61697e-190	1
CCL20	1.60423	0.219	0.058	2.38509e-198	5.02062e-194	1
PDGFB	1.5003	0.22	0.035	0	0	1
FCGBP	1.46617	0.345	0.062	0	0	1
CCL3	1.45133	0.709	0.403	0	0	1
FABP5	1.43064	0.697	0.428	0	0	1
FN1	1.41119	0.491	0.184	0	0	1
OLR1	1.34506	0.732	0.318	0	0	1
OTOA	1.34275	0.265	0.063	8.96802e-279	1.88777e-274	1
A2M	1.33518	0.658	0.242	0	0	1
ACKR3	1.32703	0.145	0.023	3.49004e-201	7.34654e-197	1
HAMP	1.32623	0.162	0.027	7.61532e-216	1.60302e-211	1
GPNMB	1.3133	0.734	0.276	0	0	1
MMP9	1.30384	0.129	0.043	3.8442e-82	8.09203e-78	1
PHLDA1	1.27567	0.342	0.096	0	0	1
LPL	1.24917	0.193	0.029	5.75183e-278	1.21076e-273	1
CCL2	1.23728	0.288	0.132	4.49255e-119	9.45681e-115	1
CXCL8	1.2337	0.579	0.36	6.30809e-165	1.32785e-160	1
SCD	1.21911	0.39	0.14	2.74273e-280	5.77345e-276	1
BHLHE41	1.20712	0.33	0.091	0	0	1
SERPINE1	1.19989	0.136	0.02	5.02276e-196	1.05729e-191	1
APOE	1.19052	0.765	0.3	0	0	1
SLC2A1	1.16983	0.144	0.052	1.14666e-86	2.41373e-82	1
PLIN2	1.15738	0.75	0.57	2.72093e-201	5.72755e-197	1
MIR155HG	1.15108	0.207	0.077	6.7743e-122	1.42599e-117	1
CST6	1.14853	0.18	0.034	8.6134e-222	1.81312e-217	1
LTC4S	1.13073	0.463	0.188	0	0	1
DOCK4	1.12236	0.512	0.196	0	0	1
TNF	1.11022	0.238	0.123	2.97809e-77	6.26888e-73	1
RGS1	1.09201	0.866	0.513	0	0	1
PRDM1	1.07833	0.474	0.24	3.96376e-211	8.34371e-207	1
IL1B	1.07368	0.552	0.447	2.45896e-57	5.1761e-53	1
GCHFR	1.07191	0.403	0.27	1.17612e-86	2.47573e-82	1
C15orf48	1.04778	0.67	0.317	0	0	1
CXCL3	1.03836	0.251	0.14	2.20961e-65	4.65123e-61	1
MELTF	1.03702	0.158	0.028	2.07659e-198	4.37122e-194	1
IER3	1.01912	0.813	0.64	2.17872e-266	4.5862e-262	1
NUPR1	1.00783	0.338	0.166	7.15724e-127	1.5066e-122	1
NR4A3	1.00153	0.477	0.216	1.415e-240	2.97858e-236	1
FMNL2	0.998248	0.494	0.216	6.45385e-293	1.35853e-288	1
ANKRD36B	0.996959	0.259	0.117	3.82244e-115	8.04623e-111	1
CSTB	0.99446	0.904	0.884	5.13964e-145	1.0819e-140	1
CLDN1	0.988382	0.295	0.11	2.30548e-177	4.85303e-173	1
TGFBR1	0.985803	0.58	0.302	1.84389e-288	3.88138e-284	1
LIPA	0.982634	0.69	0.511	4.04335e-184	8.51124e-180	1
PLD4	0.98097	0.438	0.208	1.21357e-211	2.55456e-207	1
CD81	0.975312	0.942	0.66	0	0	1
GSDME	0.970864	0.226	0.042	8.781e-282	1.8484e-277	1
PALD1	0.944674	0.283	0.09	5.35812e-217	1.12788e-212	1
SGK1	0.943254	0.878	0.646	0	0	1
MRC2	0.936207	0.286	0.101	5.86865e-194	1.23535e-189	1
AL136987.1	0.935183	0.15	0.04	2.86449e-128	6.02976e-124	1
TNS1	0.933907	0.175	0.034	1.12014e-206	2.35789e-202	1
RGCC	0.928427	0.544	0.271	7.54402e-236	1.58802e-231	1
HK2	0.924058	0.341	0.18	2.31857e-106	4.88059e-102	1
CD83	0.923427	0.774	0.54	2.65031e-285	5.5789e-281	1
ZNF331	0.923397	0.619	0.348	7.45883e-264	1.57008e-259	1
TREM2	0.914893	0.65	0.253	0	0	1
BNIP3	0.913929	0.305	0.154	3.35645e-111	7.06532e-107	1
TANC2	0.912567	0.359	0.159	7.04092e-178	1.48211e-173	1
ATF3	0.907385	0.699	0.47	9.11849e-236	1.91944e-231	1
CD109	0.89317	0.321	0.135	1.25031e-166	2.63189e-162	1
MMP2	0.885078	0.195	0.044	6.05135e-204	1.27381e-199	1
MAFF	0.879775	0.368	0.178	6.22018e-155	1.30935e-150	1
LGALS3	0.871425	0.857	0.816	1.49797e-193	3.15323e-189	1
SLC7A5	0.87084	0.311	0.096	1.63082e-237	3.43288e-233	1
IL1RN	0.869675	0.361	0.236	1.38774e-63	2.9212e-59	1
ZNF618	0.861248	0.229	0.068	2.19931e-182	4.62954e-178	1
FMNL3	0.854874	0.329	0.131	9.30878e-188	1.9595e-183	1
MIF	0.852947	0.76	0.662	4.78442e-168	1.00712e-163	1
NRP2	0.850101	0.435	0.175	3.10027e-250	6.52607e-246	1
VASH1	0.84949	0.353	0.15	6.97393e-182	1.46801e-177	1
HIST1H4C	0.846694	0.442	0.258	2.63781e-132	5.55259e-128	1
GATM	0.84585	0.272	0.113	4.1137e-139	8.65935e-135	1
DEFB1	0.841887	0.242	0.06	2.31431e-227	4.87162e-223	1
ETV5	0.83624	0.438	0.195	4.28295e-224	9.01561e-220	1
LMNA	0.834746	0.466	0.272	1.49566e-147	3.14837e-143	1
FRMD4A	0.827512	0.35	0.149	2.40138e-180	5.0549e-176	1
PADI2	0.827136	0.214	0.074	1.42126e-137	2.99174e-133	1
PMEPA1	0.826202	0.211	0.065	1.55162e-158	3.26617e-154	1
DHRS3	0.815843	0.495	0.254	1.4073e-214	2.96236e-210	1
DNASE2	0.811498	0.578	0.306	4.59003e-246	9.66201e-242	1
RASGRP3	0.809172	0.267	0.112	2.23415e-130	4.70289e-126	1
MSR1	0.804086	0.779	0.366	0	0	1
USP53	0.801346	0.218	0.119	8.03927e-63	1.69227e-58	1
ADAMDEC1	0.798438	0.163	0.059	8.81329e-94	1.8552e-89	1
KLHDC8B	0.79752	0.188	0.06	1.92437e-131	4.0508e-127	1
AXL	0.791753	0.516	0.256	8.98493e-230	1.89133e-225	1
MACC1	0.784348	0.182	0.06	3.09838e-122	6.52209e-118	1
LGMN	0.783698	0.677	0.38	3.66478e-270	7.71436e-266	1
ADAP2	0.780592	0.649	0.408	5.63533e-242	1.18624e-237	1
VEGFB	0.779516	0.606	0.356	1.73557e-233	3.65337e-229	1
CTSD	0.77386	0.953	0.828	0	0	1
VEGFA	0.773607	0.694	0.456	1.13827e-205	2.39605e-201	1
SWAP70	0.765773	0.546	0.31	5.23209e-197	1.10135e-192	1
CRP	0.764368	0.132	0.018	4.98532e-195	1.04941e-190	1
RGS16	0.76236	0.163	0.053	4.86249e-112	1.02355e-107	1
THAP2	0.758527	0.23	0.131	7.48076e-54	1.5747e-49	1
SPINK1	0.757189	0.118	0.034	3.39943e-91	7.1558e-87	1
FABP3	0.756912	0.148	0.045	3.60068e-108	7.57942e-104	1
BAG3	0.755362	0.229	0.189	3.07542e-09	6.47376e-05	1
AKR1B1	0.751539	0.58	0.356	1.76806e-189	3.72177e-185	1
BCL2	0.746519	0.357	0.184	9.74102e-127	2.05048e-122	1
ADAM28	0.745151	0.435	0.263	3.28063e-116	6.90573e-112	1
RAB42	0.736793	0.159	0.05	1.17188e-113	2.46681e-109	1
NMB	0.736308	0.147	0.09	7.89633e-27	1.66218e-22	1
SNHG12	0.734989	0.376	0.218	4.55665e-99	9.59175e-95	1
RMDN3	0.733105	0.26	0.119	9.24418e-109	1.9459e-104	1
CENPF	0.732457	0.113	0.044	5.13524e-57	1.08097e-52	1
SFMBT2	0.729479	0.323	0.152	2.75882e-132	5.80732e-128	1
ABL2	0.72922	0.344	0.222	9.88702e-62	2.08122e-57	1
MTHFD1L	0.729015	0.28	0.124	3.15968e-127	6.65113e-123	1
SLC4A7	0.72632	0.507	0.312	1.59229e-141	3.35178e-137	1
MGAT4A	0.712504	0.663	0.346	8.46364e-284	1.7816e-279	1
ELL2	0.70305	0.498	0.277	4.80991e-157	1.01249e-152	1
EGR2	0.700258	0.192	0.089	8.26131e-72	1.73901e-67	1
RASAL2	0.700026	0.25	0.1	5.10173e-129	1.07391e-124	1
SLC16A10	0.698321	0.329	0.18	1.58021e-89	3.32635e-85	1
SDC2	0.698113	0.15	0.096	2.37479e-24	4.99893e-20	1
SDSL	0.69718	0.449	0.232	8.82362e-168	1.85737e-163	1
ABHD12	0.695911	0.498	0.281	5.02841e-171	1.05848e-166	1
SMAD7	0.690684	0.247	0.105	1.37228e-114	2.88865e-110	1
GPR84	0.688036	0.262	0.097	3.11236e-150	6.55151e-146	1
GYPC	0.68695	0.526	0.355	3.69206e-123	7.77178e-119	1
CLEC5A	0.684563	0.463	0.25	4.75164e-148	1.00022e-143	1
RNASET2	0.683859	0.947	0.872	0	0	1
CYP27A1	0.682842	0.215	0.13	5.09364e-41	1.07221e-36	1
AC092683.1	0.682435	0.135	0.057	1.29015e-59	2.71577e-55	1
ANKRD37	0.680903	0.292	0.168	1.27319e-70	2.68007e-66	1
CTSL	0.678895	0.761	0.395	0	0	1
TNFAIP8L3	0.67267	0.118	0.013	7.44611e-196	1.56741e-191	1
ITGAV	0.672064	0.442	0.245	2.79345e-131	5.88022e-127	1
RANBP2	0.670805	0.594	0.465	1.37664e-81	2.89782e-77	1
SLC1A3	0.668088	0.518	0.294	1.32064e-150	2.77995e-146	1
G0S21	0.666205	0.487	0.337	1.46584e-77	3.08559e-73	1
MARCKS	0.664774	0.906	0.741	0	0	1
GNLY	0.663848	0.127	0.111	0.00948731	1	1
ENO2	0.662656	0.102	0.036	6.90073e-61	1.4526e-56	1
SRGAP3	0.661288	0.139	0.053	9.65478e-74	2.03233e-69	1
IL10	0.660971	0.172	0.084	2.60231e-55	5.47787e-51	1
PDXK	0.659618	0.695	0.492	8.08938e-205	1.70281e-200	1
LIMS1	0.659239	0.871	0.735	0	0	1
PLXDC2	0.658871	0.854	0.66	4.35508e-255	9.16745e-251	1
IFI6	0.658426	0.733	0.629	1.41678e-88	2.98232e-84	1
PLAU	0.658195	0.54	0.268	8.30494e-206	1.74819e-201	1
YWHAH	0.657464	0.857	0.644	8.12819e-301	1.71098e-296	1
GALM	0.655417	0.351	0.186	9.75865e-117	2.0542e-112	1
ZFAND2A	0.653131	0.277	0.232	3.77346e-09	7.94313e-05	1
SRGAP1	0.651246	0.212	0.133	1.31964e-38	2.77785e-34	1
P4HA1	0.647614	0.51	0.355	3.29375e-87	6.93335e-83	1
SLC2A5	0.647594	0.179	0.075	9.50614e-81	2.00104e-76	1
RAB13	0.642266	0.407	0.233	1.00167e-113	2.10852e-109	1
TUBA1C	0.641802	0.578	0.393	1.28617e-143	2.70739e-139	1
RGS12	0.641532	0.255	0.131	5.68442e-82	1.19657e-77	1
CCL5	0.641438	0.26	0.2	1.22878e-17	2.58657e-13	1
CD63	0.640177	0.979	0.906	0	0	1
TNFAIP31	0.638674	0.676	0.592	4.10024e-70	8.63101e-66	1
HS3ST1	0.636272	0.235	0.114	1.15721e-82	2.43593e-78	1
PLAUR	0.634724	0.86	0.716	1.53007e-218	3.2208e-214	1
LPAR5	0.632438	0.201	0.089	4.80542e-85	1.01154e-80	1
GADD45B	0.6284	0.779	0.643	3.33163e-130	7.01308e-126	1
CXCL2	0.628055	0.401	0.237	2.81027e-87	5.91561e-83	1
ID2	0.627965	0.76	0.591	1.07628e-168	2.26556e-164	1
HSP90AB1	0.626123	0.944	0.86	5.50248e-278	1.15827e-273	1
TWISTNB	0.626064	0.292	0.2	1.296e-33	2.72809e-29	1
HMOX1	0.626042	0.686	0.534	5.60862e-104	1.18062e-99	1
PTTG1	0.625212	0.183	0.119	2.11129e-27	4.44426e-23	1
RALA	0.624582	0.506	0.358	3.68193e-85	7.75046e-81	1
SPHK1	0.621673	0.285	0.126	4.04214e-122	8.5087e-118	1
TLR3	0.613813	0.155	0.07	4.35256e-62	9.16214e-58	1
MCRIP2	0.611068	0.415	0.238	8.33627e-117	1.75478e-112	1
BCAS2	0.603067	0.489	0.352	6.71316e-73	1.41312e-68	1
ARL4C	0.602034	0.68	0.495	3.36064e-137	7.07415e-133	1
KRT18	0.601781	0.148	0.052	3.47138e-88	7.30726e-84	1
HGF	0.600984	0.221	0.108	6.21073e-74	1.30736e-69	1
SNAPC1	0.600648	0.269	0.16	7.61644e-56	1.60326e-51	1
BIN1	0.599763	0.347	0.238	2.98453e-52	6.28244e-48	1
ADCY3	0.598434	0.226	0.11	3.11597e-79	6.55911e-75	1
CD276	0.593882	0.283	0.132	1.00253e-109	2.11033e-105	1
ARHGAP21	0.592034	0.375	0.22	4.47815e-94	9.4265e-90	1
VAT1	0.591709	0.329	0.193	1.87031e-77	3.93701e-73	1
SHISAL2A	0.590313	0.132	0.04	5.92421e-98	1.24705e-93	1
BCAT1	0.590234	0.532	0.322	3.35088e-131	7.0536e-127	1
UGCG	0.589818	0.39	0.253	2.49036e-74	5.24222e-70	1
NRIP3	0.589107	0.117	0.037	4.36481e-81	9.18793e-77	1
HERPUD1	0.58869	0.869	0.791	1.85935e-143	3.91393e-139	1
NR4A2	0.586408	0.685	0.539	8.24959e-101	1.73654e-96	1
NEK6	0.584296	0.419	0.241	1.57834e-114	3.32241e-110	1
AL161935.3	0.581263	0.149	0.051	3.59251e-91	7.56224e-87	1
RASGEF1B	0.575115	0.602	0.419	1.68122e-108	3.53896e-104	1
LDHA	0.573933	0.87	0.804	5.68088e-125	1.19583e-120	1
GNPDA1	0.573542	0.462	0.282	1.17138e-113	2.46577e-109	1
DNAJB1	0.57341	0.576	0.553	0.00200776	1	1
CAPG	0.570981	0.892	0.753	8.56527e-282	1.80299e-277	1
ABCG1	0.570652	0.429	0.243	2.18987e-114	4.60968e-110	1
PRDX1	0.570329	0.891	0.814	3.36634e-241	7.08615e-237	1
CADM1	0.570181	0.282	0.105	6.32077e-157	1.33052e-152	1
TUBA1B	0.569858	0.865	0.758	6.25859e-177	1.31743e-172	1
PPARG	0.569522	0.162	0.057	9.21686e-96	1.94015e-91	1
UNC5B	0.569406	0.124	0.051	3.56946e-58	7.51371e-54	1
ABCA1	0.568595	0.581	0.322	2.019e-179	4.24999e-175	1
MGST3	0.567791	0.765	0.618	2.76554e-182	5.82146e-178	1
TMEM51	0.566548	0.388	0.206	8.52344e-116	1.79418e-111	1
GRASP	0.566139	0.469	0.333	1.16059e-69	2.44304e-65	1
ANKH	0.565592	0.382	0.219	2.52528e-99	5.31571e-95	1
BLNK	0.564802	0.227	0.106	2.23695e-84	4.70879e-80	1
AC004817.3	0.563718	0.159	0.075	3.86185e-57	8.12919e-53	1
PIK3IP1	0.563306	0.312	0.198	3.38307e-54	7.12135e-50	1
PLA2G15	0.560391	0.365	0.197	4.36759e-105	9.19377e-101	1
ADSSL1	0.5595	0.102	0.033	1.60364e-67	3.37567e-63	1
FAM162A	0.559141	0.534	0.388	6.09399e-76	1.28278e-71	1
NDRG1	0.558781	0.365	0.284	2.39823e-26	5.04827e-22	1
SKIL	0.558137	0.709	0.509	6.80724e-142	1.43292e-137	1
HSD17B14	0.558078	0.181	0.078	1.62611e-77	3.42295e-73	1
TSC22D2	0.55758	0.319	0.214	8.89195e-49	1.87175e-44	1
IL4I1	0.557392	0.381	0.222	2.59482e-89	5.46209e-85	1
EPB41L2	0.555547	0.372	0.27	3.97084e-47	8.35862e-43	1
MGLL	0.553221	0.209	0.095	1.66987e-80	3.51507e-76	1
MMP19	0.552785	0.135	0.079	8.09807e-28	1.70464e-23	1
MXI1	0.552237	0.252	0.15	2.56228e-50	5.39361e-46	1
TCEAL4	0.549981	0.539	0.359	3.35021e-119	7.0522e-115	1
SNCA	0.549925	0.284	0.13	3.29017e-109	6.9258e-105	1
LMAN1	0.548811	0.495	0.317	1.09682e-109	2.3088e-105	1
CDCP1	0.548554	0.242	0.128	2.013e-68	4.23737e-64	1
SLC1A4	0.547554	0.2	0.087	1.64432e-85	3.4613e-81	1
IFITM10	0.546339	0.109	0.028	4.47556e-98	9.42105e-94	1
TM6SF1	0.54289	0.471	0.303	8.11882e-95	1.70901e-90	1
DNAAF1	0.542856	0.125	0.06	1.36953e-41	2.88285e-37	1
PRDX4	0.542631	0.479	0.32	1.03045e-100	2.16909e-96	1
MITF	0.542042	0.281	0.151	8.83684e-77	1.86015e-72	1
LHFPL2	0.541624	0.5	0.264	7.92661e-155	1.66855e-150	1
NPC2	0.54094	0.975	0.928	0	0	1
FAM210A	0.540641	0.225	0.121	1.32139e-60	2.78152e-56	1
ST14	0.539093	0.506	0.318	5.98963e-120	1.26082e-115	1
HSPD1	0.538376	0.736	0.668	6.58885e-36	1.38695e-31	1
SYT11	0.538124	0.222	0.109	3.45097e-74	7.2643e-70	1
TLR7	0.537108	0.295	0.159	5.17485e-81	1.08931e-76	1
NCK1-DT	0.537075	0.187	0.087	3.29536e-69	6.93674e-65	1
MEF2A	0.53653	0.696	0.577	1.49908e-102	3.15557e-98	1
CD82	0.536458	0.299	0.161	3.55215e-81	7.47728e-77	1
EPHB2	0.535696	0.175	0.071	4.68137e-83	9.85428e-79	1
SVBP	0.535523	0.467	0.292	3.49702e-107	7.36122e-103	1
GSN	0.533406	0.793	0.608	1.15229e-210	2.42558e-206	1
PXDC1	0.532534	0.27	0.139	2.30081e-84	4.84321e-80	1
CXXC5	0.528113	0.281	0.154	3.07366e-74	6.47006e-70	1
TSC22D1	0.528078	0.256	0.16	4.54245e-44	9.56186e-40	1
PKIB	0.526948	0.37	0.196	6.21645e-115	1.30856e-110	1
NR1H3	0.525452	0.17	0.096	1.38428e-37	2.91391e-33	1
TRPM2	0.525391	0.319	0.166	5.50135e-94	1.15803e-89	1
GPR183	0.52533	0.758	0.65	1.64992e-79	3.47308e-75	1
GBE1	0.524718	0.211	0.129	1.38165e-38	2.90836e-34	1
FLNB	0.52396	0.17	0.078	1.87625e-64	3.94951e-60	1
SOCS6	0.523633	0.255	0.152	2.39845e-52	5.04873e-48	1
ALOX5AP	0.522448	0.845	0.541	9.65715e-302	2.03283e-297	1
ERO1A	0.519052	0.504	0.421	2.1126e-28	4.44703e-24	1
PTGER4	0.51832	0.519	0.39	2.33382e-65	4.9127e-61	1
QPRT	0.518185	0.174	0.08	9.03525e-66	1.90192e-61	1
FAH	0.516841	0.239	0.121	9.53393e-75	2.00689e-70	1
HSPH1	0.515781	0.577	0.495	1.40612e-16	2.95989e-12	1
NAF1	0.515094	0.219	0.124	2.09983e-50	4.42014e-46	1
MPC2	0.514969	0.592	0.445	4.93827e-101	1.03951e-96	1
CYFIP1	0.513731	0.608	0.435	3.65167e-109	7.68677e-105	1
NUCKS1	0.513397	0.704	0.596	3.01286e-91	6.34207e-87	1
DNPH1	0.512837	0.496	0.35	2.36438e-89	4.97702e-85	1
CA2	0.512678	0.17	0.105	6.58996e-29	1.38719e-24	1
DUSP10	0.511791	0.283	0.163	3.68725e-65	7.76166e-61	1
IL18	0.511764	0.645	0.462	1.31887e-127	2.77623e-123	1
FTL	0.511755	1	0.999	5.12213e-234	1.07821e-229	1
AC016831.1	0.50961	0.157	0.076	6.66448e-52	1.40287e-47	1
LGALS1	0.509314	0.963	0.978	3.12116e-142	6.57003e-138	1
CKS1B	0.508656	0.252	0.168	3.35256e-37	7.05714e-33	1
ALCAM	0.50832	0.596	0.408	4.00936e-116	8.4397e-112	1
HIST1H1E	0.507144	0.183	0.098	2.69735e-48	5.67791e-44	1
ADCK2	0.506689	0.297	0.166	4.46208e-77	9.39269e-73	1
BCL2L1	0.504938	0.312	0.182	1.07874e-69	2.27074e-65	1
NUSAP1	0.504908	0.118	0.065	4.37485e-28	9.20906e-24	1
FARP1	0.504328	0.173	0.09	1.38079e-48	2.90656e-44	1
TMEM255B	0.503697	0.185	0.076	9.50375e-85	2.00054e-80	1
GPI	0.503607	0.479	0.356	3.73807e-60	7.86863e-56	1
STMN1	0.502522	0.407	0.279	2.75755e-68	5.80465e-64	1
BNC2	0.502466	0.111	0.042	3.59346e-59	7.56423e-55	1
RAPH1	0.500153	0.229	0.115	1.18872e-71	2.50225e-67	1
SLC3A2	0.50011	0.679	0.518	2.70876e-119	5.70193e-115	1
CCL13	3.51788	0.496	0.003	0	0	2
CCL18	3.32368	0.384	0.018	0	0	2
IGHG4	2.68817	0.983	0.092	0	0	2
MRC1	2.65271	0.961	0.197	0	0	2
PLTP	2.61478	0.6	0.15	0	0	2
IL2RA	2.53591	0.64	0.015	0	0	2
ERRFI1	2.53376	0.619	0.047	0	0	2
COLEC12	2.46908	0.672	0.048	0	0	2
FOLR2	2.44797	0.711	0.112	0	0	2
ACE	2.43717	0.65	0.024	0	0	2
PMP22	2.40921	0.938	0.189	0	0	2
CXCL5	2.31256	0.107	0.005	1.00769e-239	2.12118e-235	2
SELENOP	2.30685	0.415	0.072	0	0	2
F13A1	2.22603	0.839	0.274	0	0	2
CD209	2.20929	0.315	0.013	0	0	2
C2	2.18022	0.706	0.111	0	0	2
C1QA	2.16638	0.948	0.341	0	0	2
RNASE1	2.15968	0.595	0.134	0	0	2
C1QB	2.12242	0.933	0.306	0	0	2
SLCO2B1	2.10927	0.905	0.219	0	0	2
ENPP2	2.0764	0.698	0.074	0	0	2
LINC02345	2.02633	0.465	0.01	0	0	2
NRP1	2.01047	0.857	0.163	0	0	2
CCL23	1.99112	0.316	0.015	0	0	2
MAF	1.97802	0.802	0.21	0	0	2
MT1H	1.97634	0.159	0.008	0	0	2
SPRED1	1.95658	0.8	0.174	0	0	2
C1QC	1.9388	0.921	0.29	0	0	2
CTSC	1.93494	0.997	0.725	0	0	2
SDC3	1.90923	0.624	0.11	0	0	2
IGLC2	1.88886	0.973	0.197	0	0	2
IFI27	1.83465	0.611	0.132	0	0	2
MMP14	1.82208	0.741	0.138	0	0	2
TSPAN15	1.81249	0.582	0.077	0	0	2
MS4A4A	1.81022	0.939	0.324	0	0	2
OLFML2B	1.80525	0.586	0.085	0	0	2
RBP1	1.80045	0.365	0.022	0	0	2
IDH1	1.76879	0.849	0.232	0	0	2
HSPB1	1.76759	0.957	0.452	0	0	2
VMO1	1.75491	0.683	0.156	0	0	2
IL7R	1.73941	0.627	0.106	0	0	2
LYVE1	1.73574	0.142	0.008	2.1634e-302	4.55396e-298	2
DAB2	1.71293	0.914	0.318	0	0	2
LILRB5	1.70445	0.314	0.015	0	0	2
IGFBP4	1.68581	0.439	0.055	0	0	2
DNAJB4	1.67788	0.567	0.122	0	0	2
HLA-DRB5	1.67609	0.995	0.374	0	0	2
PROCR	1.67494	0.519	0.065	0	0	2
STAB1	1.67394	0.872	0.353	0	0	2
SERPING1	1.65389	0.68	0.172	0	0	2
TMIGD3	1.63133	0.507	0.097	0	0	2
PARAL1	1.6215	0.303	0	0	0	2
SIGLEC12	1.6084	0.527	0.042	0	0	2
ECM1	1.60836	0.354	0.028	0	0	2
CISH	1.60307	0.581	0.074	0	0	2
KCNMA1	1.60266	0.677	0.122	0	0	2
FAM20A	1.59303	0.446	0.044	0	0	2
ENG	1.58397	0.873	0.269	0	0	2
GADD45G	1.57717	0.459	0.117	0	0	2
GPX3	1.5691	0.545	0.094	0	0	2
GLUL	1.56083	0.998	0.78	0	0	2
MT1G	1.55567	0.355	0.054	0	0	2
ID3	1.55106	0.702	0.181	0	0	2
MARCO	1.53334	0.368	0.192	3.66854e-140	7.72227e-136	2
UGP2	1.51994	0.909	0.421	0	0	2
IGSF21	1.51529	0.379	0.029	0	0	2
ME1	1.51289	0.34	0.03	0	0	2
FCGR3A	1.50242	0.991	0.441	0	0	2
TMEM236	1.49543	0.341	0.011	0	0	2
STAC	1.48232	0.346	0.008	0	0	2
LINC01094	1.47141	0.628	0.111	0	0	2
GPR34	1.46584	0.8	0.222	0	0	2
FCGR2A	1.43752	0.995	0.739	0	0	2
LGALS3BP	1.43605	0.827	0.251	0	0	2
VSIG4	1.43207	0.796	0.257	0	0	2
MT1M	1.43151	0.13	0.015	1.56662e-205	3.29773e-201	2
MAPK13	1.42377	0.523	0.074	0	0	2
RND3	1.42257	0.242	0.027	0	0	2
CD163	1.41921	0.95	0.52	0	0	2
CTSL1	1.41012	0.908	0.371	0	0	2
PLAU1	1.40882	0.806	0.208	0	0	2
TMEM176B	1.40041	0.985	0.466	0	0	2
CTSB	1.39503	0.999	0.872	0	0	2
GAL3ST4	1.39161	0.511	0.093	0	0	2
PPIC	1.37132	0.3	0.027	0	0	2
ARHGAP18	1.3631	0.939	0.415	0	0	2
CFH	1.36234	0.308	0.012	0	0	2
TGM2	1.35904	0.509	0.091	0	0	2
TREM21	1.35123	0.856	0.215	0	0	2
SLC40A1	1.35004	0.447	0.181	3.7353e-254	7.86281e-250	2
PLD3	1.34905	0.845	0.417	0	0	2
TCEAL9	1.34563	0.509	0.103	0	0	2
ADORA3	1.33533	0.527	0.128	0	0	2
SLC7A8	1.33192	0.389	0.057	0	0	2
SMPDL3A	1.32603	0.55	0.111	0	0	2
FPR3	1.31759	0.85	0.296	0	0	2
CD14	1.3127	0.992	0.733	0	0	2
ALOX5AP1	1.30328	0.962	0.523	0	0	2
ARMT1	1.30226	0.661	0.203	0	0	2
IGKC	1.30155	0.982	0.38	0	0	2
MERTK	1.29702	0.659	0.163	0	0	2
MT1F	1.29468	0.49	0.123	0	0	2
AP2A2	1.29345	0.687	0.245	0	0	2
IGHG1	1.28384	0.686	0.088	0	0	2
ACP5	1.2816	0.809	0.307	0	0	2
LPAR6	1.27548	0.874	0.357	0	0	2
LGMN1	1.27058	0.838	0.349	0	0	2
NUPR11	1.26238	0.565	0.113	0	0	2
SLC16A101	1.2569	0.598	0.114	0	0	2
PLEKHA7	1.2431	0.365	0.038	0	0	2
PROS1	1.24074	0.309	0.021	0	0	2
BEX3	1.24046	0.464	0.102	0	0	2
TMEM37	1.24037	0.361	0.046	0	0	2
EPHX1	1.24036	0.351	0.057	0	0	2
SERPINH1	1.23858	0.381	0.074	0	0	2
ADAMTSL4	1.23282	0.704	0.177	0	0	2
TMEM176A	1.23132	0.943	0.374	0	0	2
IGFBP2	1.21988	0.114	0.023	5.73938e-125	1.20814e-120	2
APOE1	1.21309	0.932	0.275	0	0	2
ACP2	1.21287	0.656	0.182	0	0	2
IGLC3	1.21198	0.552	0.068	0	0	2
TGFBI	1.2118	0.974	0.697	0	0	2
RAB3IL1	1.21177	0.321	0.046	0	0	2
MOB3B	1.20993	0.515	0.109	0	0	2
SUCNR1	1.20992	0.425	0.07	0	0	2
ADAM9	1.208	0.795	0.276	0	0	2
PSD3	1.20104	0.36	0.05	0	0	2
ARRDC4	1.19596	0.49	0.109	0	0	2
CH25H	1.1878	0.271	0.073	5.25373e-227	1.10591e-222	2
MSR11	1.18516	0.846	0.366	0	0	2
PRUNE2	1.18494	0.252	0.014	0	0	2
CTSA	1.17584	0.922	0.558	0	0	2
PCOLCE2	1.16787	0.185	0.011	0	0	2
ITGB5	1.16585	0.427	0.085	0	0	2
ABCA11	1.1635	0.784	0.279	0	0	2
BMP2K	1.16078	0.847	0.387	0	0	2
SIGLEC1	1.15718	0.67	0.199	0	0	2
IFIT1	1.15705	0.453	0.152	0	0	2
CD59	1.15276	0.711	0.243	0	0	2
ACVRL1	1.14534	0.359	0.053	0	0	2
LHFPL21	1.14213	0.706	0.219	0	0	2
WNT5A	1.13938	0.437	0.081	0	0	2
IGHG3	1.13904	0.581	0.11	0	0	2
GAA	1.13301	0.899	0.437	0	0	2
FUCA1	1.12949	0.67	0.219	0	0	2
B3GNT7	1.11387	0.273	0.046	0	0	2
TCN2	1.11133	0.526	0.144	0	0	2
B3GNT5	1.11097	0.7	0.259	0	0	2
SOCS1	1.10436	0.526	0.157	0	0	2
PDPN	1.10069	0.306	0.053	0	0	2
MMD	1.09531	0.449	0.11	0	0	2
CREG1	1.09471	0.937	0.541	0	0	2
SLC11A2	1.08672	0.659	0.219	0	0	2
TENT5A	1.08046	0.556	0.251	3.12281e-273	6.57352e-269	2
ABCG11	1.08001	0.669	0.187	0	0	2
MAFB	1.07444	0.939	0.567	0	0	2
PDGFC	1.07367	0.434	0.098	0	0	2
CCL8	1.06615	0.11	0.011	3.28554e-187	6.91606e-183	2
ITGA6	1.06349	0.345	0.057	0	0	2
ADM	1.06193	0.501	0.192	6.12578e-304	1.28948e-299	2
CLEC11A	1.04894	0.475	0.152	0	0	2
ALCAM1	1.04789	0.821	0.356	0	0	2
SOCS2	1.04555	0.232	0.016	0	0	2
STOM	1.0431	0.805	0.364	0	0	2
CR1	1.0423	0.429	0.158	5.6015e-247	1.17911e-242	2
IER5L	1.03981	0.625	0.271	0	0	2
SLC25A19	1.03706	0.566	0.184	0	0	2
RHOBTB3	1.03656	0.376	0.076	0	0	2
EPAS1	1.0353	0.328	0.049	0	0	2
CD2761	1.03371	0.434	0.098	0	0	2
CMKLR1	1.03309	0.437	0.105	0	0	2
ANOS1	1.03158	0.27	0.04	0	0	2
FAM213A	1.03013	0.347	0.097	6.53111e-297	1.3748e-292	2
XIST	1.02928	0.976	0.452	0	0	2
CTSD1	1.0255	0.996	0.822	0	0	2
HOXB6	1.02471	0.188	0.007	0	0	2
AC108134.2	1.02203	0.153	0.016	1.53204e-260	3.22494e-256	2
RAP2A	1.01182	0.647	0.236	0	0	2
GPR82	1.00933	0.341	0.082	0	0	2
SCARB2	1.00899	0.878	0.42	0	0	2
TMEM70	1.00708	0.71	0.326	0	0	2
ENPP4	1.00703	0.356	0.069	0	0	2
HPGDS	1.00057	0.389	0.085	0	0	2
CTSZ	1.00057	0.994	0.897	0	0	2
TNFRSF11A	0.995995	0.27	0.054	0	0	2
CITED2	0.995799	0.688	0.309	0	0	2
NPL	0.99474	0.747	0.275	0	0	2
GPNMB1	0.993539	0.888	0.255	0	0	2
TSPAN4	0.982147	0.677	0.27	0	0	2
APOL4	0.979576	0.361	0.071	0	0	2
PTPRO	0.978597	0.426	0.107	0	0	2
CLEC5A1	0.977098	0.638	0.213	0	0	2
DNAJA4	0.973433	0.45	0.105	0	0	2
TMEM511	0.968873	0.557	0.169	0	0	2
EML4	0.967386	0.809	0.339	0	0	2
TWF1	0.965714	0.481	0.154	0	0	2
RBPJ	0.9652	0.948	0.73	0	0	2
NUCB1	0.964789	0.9	0.496	0	0	2
HEXA	0.963821	0.883	0.501	0	0	2
PLA2G151	0.960858	0.542	0.157	0	0	2
SLC12A5	0.959067	0.235	0.027	0	0	2
MFSD1	0.956726	0.956	0.651	0	0	2
RB1	0.955706	0.833	0.458	0	0	2
TTYH3	0.951146	0.755	0.381	0	0	2
PPP2R2B	0.949723	0.16	0.008	0	0	2
ANKH1	0.946167	0.533	0.186	0	0	2
GLMP	0.945538	0.578	0.187	0	0	2
FBP1	0.940633	0.629	0.415	2.48137e-140	5.22329e-136	2
ATP2C1	0.939637	0.656	0.242	0	0	2
PCED1B	0.938227	0.275	0.05	0	0	2
MYO7A	0.937441	0.257	0.035	0	0	2
CSF1R	0.936902	0.954	0.612	0	0	2
FCHO2	0.935404	0.625	0.218	0	0	2
CD84	0.934208	0.866	0.4	0	0	2
LILRB4	0.933189	0.84	0.413	0	0	2
PDCD1LG2	0.931737	0.234	0.028	0	0	2
MGAT4A1	0.929737	0.808	0.321	0	0	2
NUDT4	0.929335	0.424	0.186	2.81068e-190	5.91647e-186	2
MKNK1	0.927243	0.71	0.265	0	0	2
ESR1	0.922428	0.187	0.017	0	0	2
RGL1	0.921455	0.4	0.123	3.38466e-305	7.1247e-301	2
RHBDD2	0.92019	0.543	0.169	0	0	2
SIRPA	0.919398	0.916	0.485	0	0	2
NRP21	0.918992	0.527	0.162	0	0	2
JCHAIN	0.917229	0.238	0.037	0	0	2
CLDN7	0.91384	0.319	0.072	0	0	2
KIFC3	0.913287	0.324	0.064	0	0	2
SLC38A6	0.912291	0.436	0.11	0	0	2
LRPAP1	0.909695	0.874	0.518	0	0	2
OSBPL1A	0.907381	0.536	0.174	0	0	2
DSC2	0.906185	0.542	0.14	0	0	2
AP1B1	0.905464	0.786	0.4	0	0	2
C3AR1	0.903959	0.891	0.453	0	0	2
CD163L1	0.903803	0.138	0.011	2.41312e-265	5.07962e-261	2
CD151	0.902499	0.815	0.379	0	0	2
GPR137B	0.90035	0.618	0.214	0	0	2
FN11	0.898025	0.602	0.168	0	0	2
NCEH1	0.897788	0.608	0.202	0	0	2
CXCL1	0.895167	0.138	0.039	8.03645e-104	1.69167e-99	2
KIAA1147	0.893933	0.33	0.071	0	0	2
MT1E	0.89372	0.49	0.138	0	0	2
HNMT	0.893404	0.923	0.523	0	0	2
ASPH	0.893343	0.693	0.259	0	0	2
SNX24	0.890024	0.428	0.121	0	0	2
GNPTAB	0.889152	0.682	0.294	0	0	2
HSD3B7	0.888121	0.346	0.071	0	0	2
JUN	0.886713	0.889	0.659	0	0	2
IER5	0.878913	0.871	0.619	0	0	2
VAT11	0.874018	0.512	0.15	0	0	2
PRNP	0.873476	0.804	0.427	0	0	2
CXCL16	0.8697	0.924	0.606	0	0	2
IL1RAP	0.866513	0.573	0.182	0	0	2
SMIM30	0.864917	0.657	0.259	0	0	2
PDK4	0.862729	0.488	0.229	3.3747e-191	7.10374e-187	2
NECTIN2	0.861861	0.663	0.236	0	0	2
CLIC4	0.854689	0.655	0.25	0	0	2
LRRC8C	0.85445	0.56	0.202	0	0	2
BCAT11	0.85356	0.71	0.283	0	0	2
HSPH11	0.852993	0.846	0.426	0	0	2
LRP12	0.852747	0.236	0.036	0	0	2
TXNIP	0.850688	0.997	0.849	0	0	2
PLA2G7	0.849634	0.588	0.23	0	0	2
JAG1	0.847709	0.269	0.048	0	0	2
SGPP1	0.843982	0.437	0.144	0	0	2
IFI61	0.842748	0.917	0.584	0	0	2
TMEM86A	0.840252	0.287	0.067	2.62892e-289	5.53388e-285	2
HOXB7	0.837536	0.177	0.015	0	0	2
TPM1	0.837023	0.488	0.181	1.54716e-301	3.25678e-297	2
PCDH12	0.836286	0.131	0.007	7.49835e-278	1.5784e-273	2
GTF2E1	0.834192	0.256	0.06	1.94811e-248	4.10077e-244	2
SLC16A3	0.833124	0.951	0.589	0	0	2
P2RY6	0.83268	0.453	0.166	5.55612e-287	1.16956e-282	2
PKIA	0.832096	0.152	0.005	0	0	2
FAM20C	0.832066	0.409	0.154	3.98483e-239	8.38807e-235	2
HS3ST11	0.827348	0.323	0.096	2.10396e-249	4.42884e-245	2
S1PR1	0.825907	0.136	0.009	1.60974e-282	3.3885e-278	2
44264	0.825038	0.267	0.066	8.94299e-252	1.8825e-247	2
CD80	0.82346	0.365	0.099	0	0	2
CD811	0.82256	0.99	0.66	0	0	2
GCNT1	0.819422	0.346	0.1	1.31402e-274	2.76601e-270	2
CAPG1	0.819201	0.967	0.739	0	0	2
NPC1	0.818546	0.393	0.116	2.22451e-303	4.68259e-299	2
GIPC1	0.818516	0.408	0.136	8.59881e-290	1.81005e-285	2
SLC2A51	0.815939	0.261	0.057	8.50268e-271	1.78981e-266	2
HSPA1B	0.8159	0.931	0.489	0	0	2
SPPL2A	0.815662	0.819	0.427	0	0	2
FGD5	0.815418	0.206	0.036	1.9454e-260	4.09506e-256	2
MT-ND4L	0.814757	0.996	0.881	0	0	2
ISG15	0.814338	0.887	0.641	1.43171e-226	3.01375e-222	2
QSOX1	0.814028	0.747	0.331	0	0	2
FNDC3B	0.811535	0.804	0.382	0	0	2
ITGAV1	0.810954	0.605	0.21	0	0	2
GAS6	0.810443	0.562	0.212	0	0	2
ADAMDEC11	0.810418	0.19	0.056	4.18571e-136	8.81093e-132	2
ABCC3	0.809801	0.365	0.092	0	0	2
YES1	0.809479	0.142	0.007	0	0	2
FCGRT	0.809156	0.991	0.893	0	0	2
MS4A6A	0.80737	0.99	0.815	0	0	2
ZDHHC21	0.806649	0.356	0.098	1.86937e-300	3.93502e-296	2
IL4I11	0.804001	0.506	0.195	2.14539e-286	4.51605e-282	2
RASSF4	0.803826	0.876	0.515	0	0	2
EDEM2	0.80339	0.594	0.255	0	0	2
FRMD4A1	0.802317	0.435	0.135	0	0	2
FCGR1A	0.802176	0.84	0.393	0	0	2
PTGS1	0.79716	0.575	0.224	0	0	2
LRP1	0.795293	0.913	0.523	0	0	2
RNASE2	0.795174	0.496	0.181	4.3199e-296	9.09339e-292	2
HEXB	0.793312	0.877	0.516	0	0	2
44449	0.790576	0.296	0.071	3.18771e-281	6.71012e-277	2
LY96	0.790448	0.934	0.651	0	0	2
ETV51	0.788151	0.522	0.183	0	0	2
YWHAH1	0.785261	0.96	0.626	0	0	2
A2M1	0.784691	0.708	0.247	0	0	2
RHOU	0.784183	0.415	0.132	9.91654e-290	2.08743e-285	2
LAIR1	0.782577	0.894	0.468	0	0	2
SLC46A1	0.78254	0.211	0.04	3.36179e-245	7.07656e-241	2
CHID1	0.782303	0.548	0.232	1.75129e-295	3.68647e-291	2
CD631	0.781926	0.996	0.905	0	0	2
BAG31	0.781915	0.471	0.125	0	0	2
ARRDC3	0.781605	0.693	0.338	5.1185e-306	1.07744e-301	2
MPP1	0.779025	0.786	0.375	0	0	2
NEU1	0.777656	0.623	0.279	0	0	2
GIMAP5	0.777086	0.167	0.027	1.30536e-214	2.74777e-210	2
PER3	0.774958	0.244	0.054	6.44416e-253	1.3565e-248	2
GAPLINC	0.774623	0.188	0.031	2.63584e-245	5.54845e-241	2
DCUN1D3	0.773946	0.347	0.086	0	0	2
CD68	0.773634	0.993	0.816	0	0	2
ANKRD9	0.772897	0.389	0.12	9.77399e-285	2.05743e-280	2
NLRP2	0.772025	0.158	0.012	1.10359e-303	2.32305e-299	2
ZBED3-AS1	0.770522	0.151	0.019	2.34972e-232	4.94617e-228	2
ERC2	0.770337	0.128	0.005	5.32796e-296	1.12153e-291	2
RHOB	0.767728	0.887	0.633	0	0	2
HECTD2	0.765889	0.176	0.025	3.81527e-251	8.03115e-247	2
PHTF2	0.765446	0.464	0.176	2.73243e-270	5.75176e-266	2
CEMIP2	0.764577	0.459	0.179	3.9406e-243	8.29496e-239	2
PDE4DIP	0.762446	0.517	0.182	0	0	2
HSPA1A	0.760036	0.987	0.718	0	0	2
CALU	0.759721	0.619	0.264	0	0	2
LAMP2	0.759544	0.932	0.614	0	0	2
MEIKIN	0.758811	0.159	0.026	1.00659e-210	2.11887e-206	2
MAN1C1	0.756146	0.229	0.046	1.14276e-248	2.4055e-244	2
STMN11	0.755773	0.562	0.243	2.50967e-264	5.28285e-260	2
PGM2L1	0.753976	0.203	0.04	2.50633e-227	5.27583e-223	2
SGPL1	0.752843	0.479	0.187	3.27056e-265	6.88452e-261	2
CLDN23	0.752719	0.191	0.035	6.42606e-232	1.35269e-227	2
TNFRSF21	0.751928	0.306	0.093	3.10268e-226	6.53113e-222	2
DHRS31	0.750481	0.609	0.234	0	0	2
CXCL9	0.746938	0.114	0.047	2.15919e-46	4.54509e-42	2
HSD17B141	0.746891	0.249	0.065	5.34328e-217	1.12476e-212	2
ITPR2	0.746524	0.751	0.365	0	0	2
TRPV4	0.745755	0.196	0.033	1.05821e-247	2.22753e-243	2
GALC	0.74284	0.439	0.153	3.90699e-279	8.22421e-275	2
GRN	0.74259	0.996	0.953	0	0	2
TNFSF12	0.742262	0.74	0.364	0	0	2
N4BP1	0.738897	0.65	0.287	0	0	2
TGFA	0.736797	0.192	0.029	1.30344e-258	2.74373e-254	2
ITSN1	0.735818	0.318	0.099	2.86246e-222	6.02548e-218	2
SLC36A1	0.735537	0.321	0.093	4.08938e-245	8.60815e-241	2
NUDT14	0.735402	0.544	0.224	1.62592e-288	3.42256e-284	2
ACSL3	0.735007	0.728	0.326	0	0	2
FLVCR2	0.73426	0.392	0.122	8.59754e-279	1.80978e-274	2
MYC	0.733042	0.352	0.126	3.26265e-204	6.86788e-200	2
TMBIM1	0.732165	0.558	0.228	1.40896e-297	2.96586e-293	2
LAPTM4A	0.732127	0.937	0.727	0	0	2
CXCL31	0.731107	0.361	0.115	2.76779e-249	5.82619e-245	2
PTMS	0.729766	0.873	0.469	0	0	2
MCF2L2	0.728282	0.171	0.029	7.97777e-218	1.67932e-213	2
TCTEX1D1	0.727999	0.171	0.022	4.15221e-263	8.74041e-259	2
RUNX1	0.727264	0.789	0.427	0	0	2
TRPM4	0.726499	0.249	0.061	1.25694e-225	2.64586e-221	2
SLAMF8	0.725686	0.611	0.264	0	0	2
SNX6	0.723275	0.856	0.61	2.85898e-286	6.01815e-282	2
ST5	0.721369	0.171	0.027	9.28081e-231	1.95361e-226	2
TIMP2	0.721317	0.977	0.745	0	0	2
EPB41L3	0.720482	0.688	0.339	3.65463e-292	7.69299e-288	2
FMN1	0.720476	0.436	0.146	9.22455e-282	1.94177e-277	2
TFPT	0.71944	0.6	0.263	2.87312e-297	6.04793e-293	2
MAPRE3	0.718224	0.196	0.034	3.82941e-239	8.06091e-235	2
FCGR2B	0.717699	0.736	0.323	0	0	2
CAMSAP2	0.716705	0.291	0.078	5.39542e-245	1.13574e-240	2
ANKRD36B1	0.713847	0.33	0.104	4.10982e-226	8.65118e-222	2
FARP11	0.713762	0.264	0.069	6.60024e-227	1.38935e-222	2
DNASE21	0.712167	0.69	0.289	0	0	2
ATP8B4	0.712051	0.479	0.179	1.14575e-276	2.4118e-272	2
ANTXR2	0.711039	0.44	0.171	2.94229e-234	6.19353e-230	2
CXADR	0.709988	0.114	0.012	2.43603e-188	5.12784e-184	2
TM2D2	0.707529	0.498	0.208	2.62951e-250	5.53511e-246	2
CDK1	0.706512	0.138	0.04	1.48978e-99	3.13598e-95	2
HSBP1L1	0.706038	0.293	0.084	1.66062e-228	3.49561e-224	2
ABCC5	0.704534	0.396	0.133	1.259e-255	2.6502e-251	2
ITGAM	0.704508	0.858	0.448	0	0	2
TPD52	0.702814	0.296	0.107	2.78835e-174	5.86947e-170	2
CHML	0.702703	0.374	0.173	5.03021e-140	1.05886e-135	2
PRKCA	0.701673	0.365	0.131	3.05727e-214	6.43555e-210	2
RALGDS	0.699102	0.579	0.241	1.60183e-302	3.37185e-298	2
IFIT3	0.69884	0.479	0.223	5.24308e-178	1.10367e-173	2
ADAM10	0.698597	0.837	0.475	0	0	2
LAG3	0.697517	0.181	0.047	1.37777e-153	2.90022e-149	2
EYA2	0.695144	0.133	0.012	1.05246e-243	2.21543e-239	2
TMED9	0.691194	0.879	0.538	0	0	2
SPIN1	0.690336	0.433	0.163	1.08573e-245	2.28547e-241	2
AC093895.1	0.690166	0.148	0.035	3.83735e-139	8.07761e-135	2
PAPSS1	0.689693	0.646	0.298	4.18455e-299	8.80847e-295	2
ARHGEF10L	0.68872	0.388	0.131	8.32225e-244	1.75183e-239	2
DNM2	0.687638	0.724	0.371	5.07719e-300	1.06875e-295	2
MMP2-AS1	0.687551	0.156	0.029	1.12994e-183	2.37853e-179	2
ANKRD36	0.686779	0.259	0.082	1.5311e-177	3.22296e-173	2
PTGFRN	0.686752	0.185	0.036	3.63782e-211	7.65761e-207	2
HIST1H2AC	0.686215	0.314	0.146	9.49484e-114	1.99866e-109	2
ARSA	0.680535	0.517	0.205	6.74585e-277	1.42e-272	2
LAPTM5	0.680434	1	0.97	0	0	2
MCOLN1	0.680363	0.65	0.296	4.41649e-300	9.29672e-296	2
CARD11	0.678683	0.198	0.052	5.54221e-168	1.16663e-163	2
DAPK1	0.678377	0.651	0.313	2.50304e-275	5.26889e-271	2
SLC29A1	0.678195	0.381	0.121	5.7323e-264	1.20665e-259	2
MCM4	0.678058	0.224	0.059	2.54265e-188	5.35229e-184	2
P4HB	0.676493	0.922	0.635	0	0	2
LAMP1	0.675573	0.898	0.537	0	0	2
CLSTN1	0.675	0.456	0.18	2.20842e-238	4.64873e-234	2
SESN1	0.674829	0.399	0.154	9.69488e-210	2.04077e-205	2
ARL6IP1	0.674576	0.879	0.573	0	0	2
FTL1	0.673777	1	0.999	0	0	2
P2RY11	0.673483	0.208	0.059	3.06855e-163	6.45931e-159	2
ANKRD22	0.672555	0.417	0.13	3.2971e-290	6.9404e-286	2
NECAP2	0.672333	0.783	0.434	0	0	2
APMAP	0.67109	0.589	0.281	2.35233e-253	4.95165e-249	2
MT1X	0.670017	0.715	0.352	0	0	2
SLC35B4	0.668148	0.287	0.094	1.04193e-187	2.19326e-183	2
GBA	0.6666	0.497	0.197	7.23464e-258	1.52289e-253	2
CLEC2B	0.666454	0.932	0.643	0	0	2
FRMD4B	0.666084	0.641	0.321	1.18338e-254	2.491e-250	2
SCPEP1	0.665636	0.867	0.535	0	0	2
VAMP4	0.665252	0.364	0.115	1.9128e-250	4.02645e-246	2
HSD17B12	0.664147	0.63	0.317	5.87288e-265	1.23624e-260	2
SOCS61	0.663118	0.369	0.126	8.32431e-232	1.75227e-227	2
CD40	0.66286	0.593	0.254	1.18087e-297	2.48573e-293	2
CDCP11	0.662713	0.333	0.109	1.26412e-221	2.66097e-217	2
TMEM60	0.6617	0.444	0.183	7.21932e-217	1.51967e-212	2
RHOBTB1	0.658898	0.171	0.033	2.51798e-192	5.30034e-188	2
GPR65	0.656674	0.753	0.412	4.34121e-300	9.13824e-296	2
AFDN	0.656633	0.289	0.084	2.13952e-217	4.50369e-213	2
APOC2	0.656263	0.147	0.028	4.23868e-165	8.92242e-161	2
DST	0.656196	0.535	0.269	1.34455e-194	2.83029e-190	2
TGFB2	0.65564	0.136	0.022	1.90172e-176	4.00311e-172	2
GPRIN3	0.655607	0.701	0.349	1.03389e-296	2.17633e-292	2
RAP2B	0.654305	0.805	0.502	3.30197e-273	6.95065e-269	2
CD69	0.654174	0.534	0.345	1.8127e-98	3.81572e-94	2
TNFSF9	0.652639	0.248	0.101	1.59155e-112	3.35022e-108	2
DLEU7	0.652304	0.244	0.063	2.95305e-208	6.21617e-204	2
JKAMP	0.651718	0.575	0.264	1.98765e-259	4.18401e-255	2
PON2	0.651412	0.45	0.19	1.28768e-217	2.71057e-213	2
SELENOW	0.651326	0.863	0.571	0	0	2
PARP15	0.651007	0.166	0.032	8.12411e-190	1.71013e-185	2
IFIT2	0.650566	0.314	0.176	1.78472e-65	3.75683e-61	2
RAB31	0.650171	0.905	0.669	1.13087e-307	2.38049e-303	2
HAVCR2	0.647368	0.845	0.491	0	0	2
CLTC	0.64551	0.826	0.577	1.31232e-226	2.76244e-222	2
PRDX11	0.644565	0.985	0.792	0	0	2
TRPV2	0.643468	0.513	0.242	1.29457e-211	2.72507e-207	2
TMEM140	0.641355	0.317	0.107	4.4148e-196	9.29316e-192	2
SCCPDH	0.641135	0.433	0.16	1.79446e-244	3.77733e-240	2
BDH2	0.640781	0.243	0.069	7.48893e-188	1.57642e-183	2
HYAL2	0.639784	0.278	0.088	1.13555e-190	2.39032e-186	2
PARP12	0.639489	0.467	0.212	4.90441e-193	1.03238e-188	2
OSTM1	0.639263	0.594	0.273	9.50526e-257	2.00086e-252	2
NCF4	0.637915	0.791	0.44	0	0	2
EEF1AKMT3	0.637	0.144	0.023	1.20544e-191	2.53746e-187	2
SPTLC3	0.635424	0.114	0.007	6.7255e-236	1.41572e-231	2
MT-ATP8	0.635045	0.77	0.388	0	0	2
SOAT1	0.634509	0.733	0.375	2.74444e-290	5.77705e-286	2
BANK1	0.63023	0.219	0.06	8.79663e-177	1.85169e-172	2
ZDHHC12	0.629714	0.549	0.262	4.27911e-215	9.00753e-211	2
AQP3	0.628434	0.132	0.017	6.47182e-195	1.36232e-190	2
WWP1	0.627931	0.308	0.161	2.20961e-83	4.65124e-79	2
HRH1	0.627681	0.122	0.015	1.29901e-187	2.73441e-183	2
CD180	0.626757	0.388	0.163	7.19011e-178	1.51352e-173	2
DOCK7	0.626028	0.326	0.127	2.44627e-169	5.14941e-165	2
FFAR4	0.625862	0.192	0.046	5.58322e-179	1.17527e-174	2
EOGT	0.625857	0.206	0.053	5.92226e-179	1.24664e-174	2
SMIM4	0.625154	0.607	0.319	1.17017e-204	2.46321e-200	2
FKBP4	0.624745	0.54	0.237	2.19379e-245	4.61793e-241	2
COLGALT1	0.624728	0.706	0.353	3.21163e-282	6.76049e-278	2
TNS3	0.624159	0.414	0.181	2.00884e-174	4.22861e-170	2
SLFN5	0.620098	0.467	0.195	3.68959e-213	7.76658e-209	2
ATF7IP2	0.619697	0.252	0.133	1.93534e-65	4.07388e-61	2
S1PR2	0.618149	0.187	0.047	1.38414e-164	2.91362e-160	2
CCDC170	0.617813	0.312	0.111	1.89717e-178	3.99354e-174	2
CTNS	0.617265	0.279	0.09	1.33064e-183	2.80099e-179	2
SLC39A8	0.617086	0.369	0.114	6.56166e-262	1.38123e-257	2
WDR11	0.616096	0.548	0.261	1.24543e-216	2.62164e-212	2
HSP90AA1	0.616038	0.998	0.948	0	0	2
EMILIN1	0.615403	0.131	0.021	1.37445e-172	2.89321e-168	2
PIK3IP11	0.614253	0.43	0.171	4.26038e-213	8.96809e-209	2
FAM129B	0.610762	0.405	0.169	1.93785e-183	4.07918e-179	2
TCF12	0.610187	0.507	0.228	3.27963e-215	6.90363e-211	2
SLC31A1	0.610181	0.518	0.236	8.17616e-216	1.72108e-211	2
NAGLU	0.609471	0.375	0.141	3.84015e-201	8.08352e-197	2
HLA-DOA	0.609071	0.586	0.324	1.95e-182	4.10475e-178	2
CPED1	0.607322	0.381	0.145	5.05064e-199	1.06316e-194	2
PDIA4	0.606572	0.679	0.355	2.54849e-247	5.36456e-243	2
AMIGO2	0.606408	0.144	0.025	3.30825e-174	6.96386e-170	2
ADGRG1	0.605699	0.12	0.038	2.19679e-77	4.62424e-73	2
HSPA6	0.605687	0.585	0.261	1.08396e-283	2.28174e-279	2
ATP6AP2	0.60562	0.936	0.742	0	0	2
PLOD1	0.605599	0.395	0.147	2.31149e-213	4.86568e-209	2
SNX2	0.60529	0.871	0.613	0	0	2
EPHB21	0.605077	0.217	0.064	1.40987e-157	2.96777e-153	2
SNX9	0.604748	0.468	0.21	1.13494e-198	2.38904e-194	2
TSC22D11	0.603794	0.323	0.146	1.51832e-121	3.19606e-117	2
VPS8	0.603083	0.45	0.195	1.07756e-193	2.26826e-189	2
GALM1	0.603018	0.434	0.171	6.34774e-217	1.3362e-212	2
NTAN1	0.602329	0.555	0.251	8.56843e-234	1.80365e-229	2
CNRIP1	0.60226	0.135	0.02	3.12651e-189	6.58131e-185	2
GOLGA4	0.601523	0.666	0.386	4.61484e-194	9.71425e-190	2
ETNK1	0.601442	0.681	0.357	4.15865e-247	8.75395e-243	2
HACD3	0.600669	0.341	0.129	2.64608e-182	5.56999e-178	2
RAB421	0.600299	0.171	0.052	1.07323e-119	2.25915e-115	2
AKIP1	0.597365	0.4	0.16	5.60101e-199	1.17901e-194	2
ATP6V0A1	0.596481	0.642	0.303	4.23306e-260	8.91059e-256	2
VKORC1	0.595468	0.769	0.438	9.10655e-285	1.91693e-280	2
PTPRM	0.595006	0.12	0.015	3.25676e-188	6.85549e-184	2
SPP11	0.594304	0.829	0.296	0	0	2
ACSM3	0.592949	0.129	0.026	2.09394e-136	4.40775e-132	2
GAS2L3	0.59294	0.299	0.112	1.28363e-158	2.70204e-154	2
BCL2L12	0.592923	0.396	0.165	1.08729e-180	2.28874e-176	2
MAN1A1	0.592421	0.545	0.276	1.37437e-183	2.89304e-179	2
SPINT1	0.591981	0.512	0.24	2.55242e-202	5.37284e-198	2
TNNT1	0.591332	0.17	0.048	1.44261e-124	3.03669e-120	2
SMIM37	0.591244	0.647	0.347	8.52442e-219	1.79439e-214	2
NPTN	0.590735	0.748	0.418	2.81713e-273	5.93006e-269	2
NRIP1	0.590278	0.624	0.315	4.93752e-224	1.03935e-219	2
STEAP3	0.59005	0.185	0.049	3.41931e-152	7.19764e-148	2
FHAD1	0.589286	0.14	0.026	1.1077e-165	2.33171e-161	2
IFI44	0.589134	0.71	0.368	3.95372e-249	8.32257e-245	2
IFIT5	0.588723	0.299	0.11	1.32412e-160	2.78726e-156	2
DYNLT3	0.587696	0.528	0.234	6.36376e-230	1.33957e-225	2
TNFRSF1A	0.586994	0.88	0.563	0	0	2
MTMR6	0.586715	0.543	0.248	3.61008e-219	7.59921e-215	2
HSPA5	0.586596	0.866	0.637	7.51237e-216	1.58135e-211	2
EVA1B	0.585307	0.518	0.249	2.48141e-193	5.22336e-189	2
AC074327.1	0.585257	0.14	0.024	2.14221e-173	4.50936e-169	2
LMBRD1	0.584173	0.585	0.286	1.15269e-218	2.4264e-214	2
MYO1C	0.583711	0.295	0.111	2.42377e-156	5.10204e-152	2
WDFY3	0.582719	0.473	0.212	5.10492e-189	1.07459e-184	2
NEK61	0.581474	0.515	0.223	3.50599e-226	7.3801e-222	2
SPATS2L	0.580512	0.607	0.298	1.89231e-224	3.9833e-220	2
PRSS36	0.579035	0.151	0.034	4.07716e-149	8.58243e-145	2
FMNL21	0.578907	0.52	0.221	1.84288e-236	3.87926e-232	2
MPZL1	0.578784	0.46	0.195	9.54579e-205	2.00939e-200	2
CCL21	0.578623	0.386	0.113	2.33872e-294	4.923e-290	2
POLR2J3.1	0.57842	0.651	0.328	1.57877e-236	3.3233e-232	2
TUBA1C1	0.57833	0.667	0.377	3.67592e-187	7.73781e-183	2
RHOH	0.577386	0.32	0.11	9.16178e-191	1.92856e-186	2
RBP4	0.576303	0.106	0.018	3.54788e-132	7.46829e-128	2
ST141	0.575277	0.566	0.31	3.57771e-161	7.53109e-157	2
ITGA9	0.574631	0.128	0.021	2.59547e-164	5.46347e-160	2
SCN1B	0.57451	0.212	0.072	1.11894e-129	2.35538e-125	2
PTGR1	0.573927	0.224	0.073	1.60961e-143	3.38822e-139	2
IL21R	0.573207	0.134	0.03	4.05265e-132	8.53082e-128	2
ARHGAP12	0.572463	0.232	0.081	1.55692e-133	3.27731e-129	2
ST6GAL1	0.57246	0.431	0.201	8.0637e-163	1.69741e-158	2
PLXND1	0.572121	0.56	0.269	1.20877e-203	2.54445e-199	2
GTF3C1	0.571868	0.292	0.125	1.43615e-120	3.0231e-116	2
DGKH	0.571537	0.206	0.064	3.88564e-139	8.17928e-135	2
IGHA1	0.57125	0.422	0.136	3.53414e-264	7.43938e-260	2
P4HA2	0.571156	0.147	0.027	8.94349e-174	1.8826e-169	2
AL035446.1	0.571013	0.182	0.045	6.42833e-163	1.35316e-158	2
SH3PXD2B	0.570711	0.267	0.078	9.86275e-190	2.07611e-185	2
NPC21	0.570366	0.998	0.923	0	0	2
ZCCHC2	0.570035	0.434	0.19	2.61501e-181	5.5046e-177	2
IQCG	0.569197	0.203	0.062	3.2619e-141	6.86631e-137	2
SELENOT	0.569121	0.885	0.622	0	0	2
SELENOM	0.569038	0.303	0.113	4.74773e-160	9.99396e-156	2
AP2S1	0.56891	0.98	0.86	0	0	2
TCHH	0.568637	0.145	0.024	2.14355e-180	4.51217e-176	2
TMEM163	0.567923	0.133	0.018	5.85784e-190	1.23308e-185	2
SNX8	0.566929	0.484	0.233	1.57252e-175	3.31015e-171	2
EEF2K	0.56491	0.22	0.073	2.3695e-137	4.98779e-133	2
C2CD5	0.564135	0.372	0.146	9.59724e-181	2.02022e-176	2
CALR	0.563784	0.963	0.767	0	0	2
DNAJC5B	0.563303	0.124	0.022	6.98496e-147	1.47033e-142	2
HSPE1	0.562843	0.927	0.701	0	0	2
CD164	0.562398	0.941	0.712	0	0	2
NHLRC3	0.562162	0.549	0.26	1.30788e-211	2.7531e-207	2
DRAM1	0.561462	0.505	0.223	1.17516e-206	2.47372e-202	2
NFE2L1	0.561216	0.415	0.182	1.44753e-172	3.04706e-168	2
CLEC7A	0.56006	0.963	0.798	0	0	2
RPP25	0.559503	0.203	0.07	1.67267e-121	3.52096e-117	2
IFI27L2	0.55946	0.865	0.566	5.24367e-284	1.10379e-279	2
CHORDC1	0.559389	0.547	0.291	6.33305e-172	1.33311e-167	2
SDCCAG8	0.559264	0.63	0.335	9.85291e-202	2.07404e-197	2
PLOD3	0.558964	0.429	0.19	3.09887e-177	6.52312e-173	2
CD1091	0.557733	0.364	0.132	4.24532e-201	8.93639e-197	2
SOWAHC	0.556753	0.136	0.028	1.39169e-141	2.92951e-137	2
ABHD3	0.555147	0.452	0.202	1.87767e-183	3.9525e-179	2
CDKN2C	0.554677	0.216	0.1	5.12842e-76	1.07953e-71	2
ETS2	0.554664	0.933	0.64	0	0	2
RCAN1	0.554384	0.285	0.122	3.241e-118	6.82231e-114	2
CSRP1	0.552566	0.596	0.313	6.00498e-191	1.26405e-186	2
CACNA2D4	0.55255	0.359	0.135	6.52526e-183	1.37357e-178	2
ABHD121	0.551782	0.558	0.274	1.03419e-196	2.17698e-192	2
TMEM9	0.551481	0.314	0.12	2.68393e-160	5.64966e-156	2
SEL1L3	0.550875	0.297	0.126	1.27469e-127	2.68323e-123	2
ACOT11	0.550007	0.153	0.039	4.89892e-132	1.03122e-127	2
PTPN22	0.549931	0.517	0.242	5.26996e-198	1.10933e-193	2
DOCK1	0.549779	0.149	0.041	8.38694e-118	1.76545e-113	2
SENP3	0.549342	0.167	0.048	7.48525e-124	1.57565e-119	2
NFATC2	0.549032	0.296	0.133	2.78763e-117	5.86797e-113	2
TSPYL2	0.54883	0.248	0.115	9.84933e-87	2.07328e-82	2
GPR155	0.548626	0.34	0.158	1.48144e-118	3.11842e-114	2
TNIK	0.548488	0.122	0.017	8.79062e-174	1.85042e-169	2
TFEC	0.548162	0.791	0.438	1.12109e-258	2.3599e-254	2
SPTAN1	0.547969	0.445	0.215	2.60563e-154	5.48484e-150	2
EPS15	0.546576	0.605	0.342	7.62271e-171	1.60458e-166	2
AC092683.11	0.546048	0.165	0.052	2.88672e-108	6.07655e-104	2
UQCC2	0.545858	0.677	0.393	7.94095e-195	1.67157e-190	2
AL118508.1	0.54543	0.101	0.021	1.21303e-105	2.55343e-101	2
SDSL1	0.545117	0.487	0.231	3.86377e-176	8.13324e-172	2
SLC38A7	0.544996	0.256	0.089	4.91728e-147	1.03509e-142	2
MZB1	0.544917	0.109	0.011	2.79904e-181	5.89198e-177	2
CD200R1	0.544591	0.147	0.042	4.44702e-112	9.36098e-108	2
ANKRD36C	0.544229	0.25	0.097	1.29435e-124	2.7246e-120	2
TENT2	0.543794	0.554	0.272	8.41841e-194	1.77207e-189	2
AKR1B11	0.542574	0.659	0.345	9.40663e-227	1.9801e-222	2
APOL1	0.54151	0.29	0.121	1.08725e-125	2.28866e-121	2
KIF1BP	0.541293	0.205	0.072	1.44778e-116	3.04757e-112	2
TGFBR2	0.541113	0.688	0.387	5.96512e-205	1.25566e-200	2
MGST31	0.541092	0.882	0.593	5.36997e-290	1.13038e-285	2
UNC93B1	0.540749	0.842	0.555	1.17814e-234	2.47999e-230	2
ENOSF1	0.540681	0.253	0.093	6.24483e-136	1.31454e-131	2
CCDC106	0.539534	0.21	0.073	7.43468e-123	1.565e-118	2
DOK2	0.539509	0.857	0.522	8.96586e-265	1.88731e-260	2
UPP1	0.539418	0.897	0.602	6.50809e-296	1.36995e-291	2
LAMB2	0.538957	0.171	0.043	4.51943e-145	9.5134e-141	2
CYBRD1	0.538744	0.332	0.145	2.49843e-130	5.25919e-126	2
CD4	0.538669	0.892	0.67	9.68567e-218	2.03883e-213	2
TCEAL8	0.538091	0.535	0.262	6.67984e-187	1.40611e-182	2
PLEKHO2	0.537504	0.569	0.311	1.93744e-162	4.07831e-158	2
CISD3	0.537471	0.618	0.329	4.00873e-196	8.43837e-192	2
PARP9	0.537047	0.667	0.354	3.51755e-208	7.40443e-204	2
BCL2L11	0.536892	0.455	0.211	1.14368e-167	2.40745e-163	2
SEMA4B	0.536402	0.207	0.059	3.31902e-151	6.98653e-147	2
VWA5A	0.536159	0.177	0.044	1.22131e-154	2.57087e-150	2
HCFC1R1	0.535941	0.545	0.274	3.68873e-184	7.76478e-180	2
TMX3	0.534335	0.504	0.235	1.84958e-191	3.89336e-187	2
TRIP6	0.534232	0.305	0.128	6.89833e-133	1.4521e-128	2
CLPTM1	0.533671	0.504	0.233	8.49555e-192	1.78831e-187	2
S100A11	0.53323	1	0.992	0	0	2
CBR1	0.532633	0.56	0.294	1.83319e-172	3.85886e-168	2
GTF2H5	0.532283	0.736	0.447	9.09113e-213	1.91368e-208	2
AMDHD2	0.532234	0.375	0.166	5.07203e-147	1.06766e-142	2
IGHG2	0.531068	0.148	0.03	4.70771e-157	9.90974e-153	2
LARP4	0.53067	0.45	0.211	7.38247e-165	1.55401e-160	2
SCOC	0.530412	0.46	0.227	9.49614e-160	1.99894e-155	2
GLA	0.530226	0.551	0.271	5.27227e-190	1.10981e-185	2
TPP1	0.529952	0.95	0.769	0	0	2
TMEM106A	0.529772	0.359	0.156	8.8019e-148	1.8528e-143	2
ZBTB38	0.529413	0.462	0.213	2.77762e-175	5.8469e-171	2
NMRK1	0.529312	0.282	0.114	1.07044e-129	2.25327e-125	2
NDUFV2	0.529211	0.874	0.624	3.48476e-252	7.33541e-248	2
CYFIP11	0.528348	0.723	0.412	2.49567e-214	5.25338e-210	2
SLC2A8	0.528347	0.244	0.091	4.32626e-130	9.10678e-126	2
EDNRB	0.528336	0.12	0.022	2.66469e-140	5.60917e-136	2
APEX2	0.5283	0.271	0.105	1.53531e-132	3.23184e-128	2
BEX4	0.52811	0.538	0.304	7.49752e-142	1.57823e-137	2
TFCP2L1	0.527975	0.109	0.017	4.89427e-143	1.03024e-138	2
AC007336.1	0.526524	0.12	0.033	3.77837e-93	7.95347e-89	2
AIFM2	0.526416	0.132	0.03	1.24527e-126	2.62129e-122	2
CACYBP	0.525701	0.759	0.457	1.54028e-217	3.24228e-213	2
TMEM59	0.525551	0.927	0.749	0	0	2
AGPAT2	0.525245	0.661	0.35	2.50986e-212	5.28325e-208	2
GNG12	0.525116	0.102	0.017	3.94018e-126	8.29408e-122	2
NDN	0.523463	0.11	0.019	1.94226e-135	4.08847e-131	2
CD2AP	0.523139	0.452	0.225	2.77608e-146	5.84365e-142	2
MFSD12	0.522838	0.656	0.365	1.25775e-189	2.64756e-185	2
SLC17A5	0.521622	0.323	0.128	3.72828e-153	7.84803e-149	2
SMIM15	0.521355	0.518	0.27	2.5611e-163	5.39112e-159	2
FUCA2	0.521081	0.626	0.339	3.0788e-195	6.48088e-191	2
DPP7	0.520257	0.915	0.644	5.6115e-287	1.18122e-282	2
TMEM106B	0.520159	0.366	0.143	1.07125e-174	2.25499e-170	2
PIM1	0.518975	0.383	0.185	1.4838e-123	3.1234e-119	2
RNASE4	0.518662	0.159	0.037	8.33974e-146	1.75552e-141	2
VWA8	0.516925	0.166	0.048	6.7851e-121	1.42826e-116	2
CNIH4	0.516903	0.617	0.342	8.56626e-176	1.8032e-171	2
CLN5	0.516577	0.428	0.197	1.01639e-160	2.1395e-156	2
LPAR51	0.514234	0.215	0.09	1.89913e-93	3.99768e-89	2
NT5C3B	0.514223	0.28	0.113	1.22593e-130	2.58058e-126	2
SIGLEC11	0.514199	0.105	0.016	8.78612e-141	1.84948e-136	2
AC020909.2	0.513843	0.131	0.025	4.90992e-149	1.03354e-144	2
INSIG2	0.51367	0.389	0.159	1.69596e-175	3.57e-171	2
ARHGAP10	0.513098	0.301	0.116	1.67271e-147	3.52105e-143	2
WFS1	0.512619	0.11	0.017	7.93726e-148	1.67079e-143	2
PDK1	0.511675	0.242	0.082	6.33965e-141	1.3345e-136	2
SPINT2	0.511496	0.832	0.515	4.48807e-248	9.44738e-244	2
APPL2	0.511475	0.276	0.104	4.50752e-141	9.48832e-137	2
CCSAP	0.511311	0.34	0.157	2.01869e-122	4.24935e-118	2
SIL1	0.510951	0.585	0.306	1.09095e-185	2.29646e-181	2
ARSB	0.510515	0.327	0.139	3.78441e-135	7.96619e-131	2
ARL1	0.509652	0.505	0.256	1.80639e-166	3.80246e-162	2
SKI	0.509593	0.424	0.182	2.51962e-171	5.30379e-167	2
PRAG1	0.509247	0.2	0.07	5.86642e-114	1.23488e-109	2
FABP31	0.508895	0.152	0.049	1.27109e-96	2.67564e-92	2
SPIRE1	0.507586	0.195	0.061	9.12302e-128	1.9204e-123	2
CD74	0.506768	1	0.991	0	0	2
EPB41L21	0.506724	0.495	0.241	1.52108e-170	3.20188e-166	2
CPEB4	0.505785	0.661	0.351	1.22507e-202	2.57877e-198	2
P4HA11	0.505714	0.669	0.319	4.35959e-275	9.17694e-271	2
SDF4	0.505648	0.661	0.38	6.7308e-180	1.41683e-175	2
FAM89A	0.505567	0.226	0.074	8.00344e-138	1.68472e-133	2
AGRN	0.50512	0.162	0.053	5.14051e-102	1.08208e-97	2
SLC49A3	0.504969	0.325	0.129	1.94565e-150	4.09559e-146	2
C4orf48	0.504227	0.96	0.736	0	0	2
ATP6AP1	0.503636	0.897	0.599	5.45732e-277	1.14877e-272	2
RNFT1	0.503553	0.427	0.19	5.34092e-166	1.12426e-161	2
EMC2	0.503462	0.426	0.201	1.13904e-153	2.39767e-149	2
AC091271.1	0.503447	0.203	0.109	1.48756e-47	3.13132e-43	2
ZNF552	0.503199	0.115	0.027	4.35753e-108	9.17261e-104	2
ZFAND2A1	0.501996	0.391	0.203	3.51292e-121	7.39471e-117	2
GM2A	0.501109	0.67	0.363	8.09754e-201	1.70453e-196	2
CFD1	0.500768	0.79	0.536	1.42599e-113	3.00171e-109	2
MGAT5	0.500292	0.239	0.092	1.64622e-115	3.4653e-111	2
COMMD4	0.500276	0.542	0.291	2.46358e-155	5.18583e-151	2
SAV1	0.500262	0.311	0.121	2.29876e-150	4.83889e-146	2
CD1C	2.97266	0.849	0.079	0	0	3
FCER1A	2.53229	0.665	0.033	0	0	3
CLEC10A	2.13337	0.809	0.207	0	0	3
CD1E	2.09446	0.535	0.044	0	0	3
ENHO	2.05616	0.35	0.014	0	0	3
PPP1R14A	1.74222	0.311	0.029	0	0	3
CAVIN2	1.68038	0.166	0.014	8.49625e-273	1.78846e-268	3
SLC38A1	1.64284	0.548	0.074	0	0	3
CST7	1.54433	0.56	0.128	0	0	3
SPIB	1.5427	0.317	0.037	0	0	3
IL1R2	1.5419	0.479	0.086	0	0	3
LAMP3	1.48681	0.108	0.017	8.18814e-117	1.7236e-112	3
AFF3	1.47341	0.393	0.039	0	0	3
HLA-DQA2	1.44222	0.711	0.372	0	0	3
CACNA2D3	1.43194	0.502	0.072	0	0	3
P2RY14	1.40603	0.494	0.072	0	0	3
FSCN1	1.32425	0.203	0.103	2.09206e-41	4.40379e-37	3
EBI3	1.23445	0.161	0.067	2.86282e-47	6.02625e-43	3
IL18R1	1.16457	0.291	0.034	0	0	3
C12orf45	1.14199	0.636	0.249	0	0	3
AL138899.1	1.13308	0.156	0.017	6.30434e-226	1.32706e-221	3
C12orf75	1.12131	0.372	0.073	0	0	3
NRARP	1.07759	0.258	0.072	7.91909e-156	1.66697e-151	3
AREG	1.07432	0.564	0.291	1.05414e-145	2.21896e-141	3
BCL7A	1.03322	0.27	0.041	0	0	3
DUSP5	1.03065	0.317	0.13	6.15649e-105	1.29594e-100	3
AKR1C3	1.02414	0.145	0.037	1.237e-95	2.60389e-91	3
PPA1	1.00203	0.91	0.551	0	0	3
PKIB1	0.993334	0.54	0.198	2.51527e-248	5.29464e-244	3
GPAT3	0.981522	0.542	0.172	1.79455e-297	3.77752e-293	3
HLA-DQB1	0.979457	0.996	0.844	0	0	3
CLIC2	0.978737	0.52	0.167	2.19801e-285	4.6268e-281	3
HLA-DPB1	0.974151	0.998	0.919	0	0	3
FLT3	0.967144	0.443	0.087	0	0	3
IRF4	0.96045	0.19	0.03	5.04211e-202	1.06136e-197	3
LTB	0.956817	0.45	0.221	1.73762e-105	3.6577e-101	3
HLA-DQA1	0.943858	0.998	0.77	0	0	3
CLEC4F	0.942068	0.161	0.025	1.04202e-175	2.19346e-171	3
GRIP1	0.910579	0.147	0.004	0	0	3
MARCKSL1	0.896628	0.446	0.257	4.83063e-63	1.01685e-58	3
COL9A2	0.880664	0.254	0.04	2.45551e-273	5.16885e-269	3
GPR157	0.859217	0.15	0.036	1.02661e-103	2.16102e-99	3
GPR171	0.853412	0.16	0.022	3.3402e-191	7.03112e-187	3
IFITM1	0.850346	0.31	0.107	4.65188e-134	9.7922e-130	3
MAP4K1	0.845682	0.321	0.082	1.44063e-217	3.03253e-213	3
PLD41	0.844372	0.67	0.211	0	0	3
HLA-DPA1	0.840571	0.999	0.943	0	0	3
RUNX3	0.838026	0.482	0.235	5.46582e-127	1.15055e-122	3
ITM2C	0.827414	0.301	0.077	2.64362e-199	5.56482e-195	3
CD2	0.824969	0.266	0.063	1.58283e-188	3.33186e-184	3
TMEM156	0.810839	0.272	0.082	4.74301e-148	9.98403e-144	3
MCOLN2	0.808977	0.286	0.081	4.97017e-166	1.04622e-161	3
GRASP1	0.800284	0.653	0.329	4.02034e-175	8.46281e-171	3
PDLIM1	0.789381	0.218	0.042	1.55273e-194	3.26849e-190	3
SPNS3	0.784774	0.242	0.052	1.74952e-192	3.68275e-188	3
TMEM273	0.777904	0.483	0.22	4.70789e-147	9.9101e-143	3
TRABD2A	0.772558	0.163	0.026	5.5177e-175	1.16148e-170	3
DEPTOR	0.760894	0.199	0.047	3.69996e-145	7.78841e-141	3
RPS18	0.750205	1	0.995	0	0	3
AC064805.1	0.739329	0.194	0.031	4.66258e-202	9.81473e-198	3
GHRL	0.737637	0.178	0.028	5.11319e-188	1.07633e-183	3
TCTN3	0.737227	0.277	0.12	1.42072e-81	2.99061e-77	3
NDRG2	0.736788	0.571	0.218	2.53526e-235	5.33671e-231	3
CD1D1	0.731122	0.65	0.288	2.19359e-216	4.61751e-212	3
RAB33A	0.726957	0.157	0.041	1.52644e-99	3.21315e-95	3
EEF1B2	0.724587	0.991	0.912	0	0	3
RPL5	0.719044	0.993	0.958	0	0	3
RPS29	0.7159	0.998	0.988	0	0	3
RPS23	0.713957	0.999	0.994	0	0	3
TLR10	0.708155	0.272	0.082	6.5473e-140	1.37821e-135	3
PAK1	0.706356	0.802	0.503	2.39506e-199	5.0416e-195	3
CCND2	0.702001	0.377	0.152	3.99149e-127	8.4021e-123	3
ATP1B1	0.700766	0.544	0.26	2.94336e-149	6.19577e-145	3
SH3BP4	0.696154	0.192	0.044	2.25269e-142	4.74191e-138	3
SLC41A2	0.695409	0.222	0.082	4.72933e-87	9.95524e-83	3
HLA-DRB1	0.692544	0.998	0.959	0	0	3
PPP1R16A	0.691517	0.207	0.058	7.19499e-120	1.51455e-115	3
BORCS5	0.691112	0.381	0.163	2.13896e-117	4.50251e-113	3
BASP1	0.690674	0.893	0.479	5.88956e-276	1.23975e-271	3
AC114760.2	0.688826	0.273	0.097	1.95772e-108	4.12101e-104	3
UVRAG	0.688616	0.591	0.292	3.79497e-160	7.98841e-156	3
FILIP1L	0.686672	0.316	0.129	8.84285e-104	1.86142e-99	3
AC058791.1	0.685713	0.284	0.114	9.28215e-94	1.95389e-89	3
HLA-DRA	0.683777	1	0.992	0	0	3
RPS3A	0.682601	0.996	0.99	0	0	3
RPS7	0.681503	0.998	0.981	0	0	3
CST3	0.680379	0.992	0.994	0	0	3
RPS5	0.680324	0.99	0.947	0	0	3
TMEM8B	0.679033	0.173	0.026	4.03973e-190	8.50363e-186	3
RPL10A	0.677496	0.996	0.947	0	0	3
NET1	0.672921	0.314	0.136	3.03351e-91	6.38554e-87	3
HIC1	0.671044	0.211	0.066	8.18324e-104	1.72257e-99	3
RPS6	0.669233	0.998	0.987	0	0	3
HIST1H4C1	0.668605	0.457	0.283	1.20326e-46	2.53286e-42	3
BCL11A	0.666618	0.395	0.155	5.63823e-136	1.18685e-131	3
RYR1	0.661136	0.194	0.041	8.24787e-156	1.73618e-151	3
P2RY10	0.658258	0.131	0.021	3.98875e-135	8.39633e-131	3
CIITA	0.65503	0.775	0.471	1.16801e-166	2.45866e-162	3
FCGR2B1	0.650537	0.66	0.378	9.29274e-138	1.95612e-133	3
RPSA	0.650218	0.991	0.928	0	0	3
OFD1	0.648341	0.402	0.19	5.1852e-102	1.09149e-97	3
IDO1	0.642347	0.214	0.076	2.75743e-77	5.80439e-73	3
HDAC9	0.64063	0.466	0.193	2.62857e-147	5.53315e-143	3
DUSP4	0.639256	0.154	0.071	1.17297e-36	2.46909e-32	3
RPS4Y11	0.637265	0.431	0.265	1.35905e-65	2.86079e-61	3
RTN1	0.636257	0.443	0.203	8.9559e-118	1.88522e-113	3
RPL36A	0.635086	0.989	0.926	0	0	3
MAGEF1	0.633401	0.307	0.122	2.02564e-104	4.26398e-100	3
RPL37	0.633332	0.998	0.995	0	0	3
RPS4X	0.632483	0.997	0.986	0	0	3
RPL3	0.631918	0.999	0.982	0	0	3
RPL6	0.629286	0.997	0.97	0	0	3
RPL31	0.626724	0.966	0.826	9.74515e-222	2.05135e-217	3
UTF1	0.625589	0.214	0.068	7.89331e-99	1.66154e-94	3
UPK3A	0.62528	0.181	0.053	2.16757e-95	4.56273e-91	3
RPL23A	0.623418	0.994	0.978	0	0	3
GEM	0.622706	0.109	0.023	1.13939e-84	2.39842e-80	3
PSTPIP2	0.616269	0.566	0.301	1.36854e-114	2.88078e-110	3
RPL17	0.614295	0.938	0.726	5.80323e-231	1.22158e-226	3
HLA-DOB	0.611239	0.254	0.073	3.36181e-134	7.07662e-130	3
CCNB1IP1	0.608568	0.343	0.138	2.60145e-114	5.47605e-110	3
DAPP1	0.606821	0.605	0.347	3.69572e-99	7.77949e-95	3
RNASE6	0.606641	0.869	0.698	1.99652e-133	4.20267e-129	3
RHOF	0.605893	0.401	0.173	9.64435e-117	2.03014e-112	3
RPS10	0.604065	0.994	0.978	0	0	3
EEF1E1	0.603833	0.524	0.267	1.19603e-120	2.51764e-116	3
JAML1	0.603297	0.914	0.609	7.21143e-221	1.51801e-216	3
AC009093.2	0.60317	0.185	0.051	5.819e-106	1.2249e-101	3
GPR18	0.600517	0.144	0.031	9.35199e-113	1.96859e-108	3
RPS19	0.598547	0.999	0.996	0	0	3
CCDC50	0.598141	0.612	0.337	3.22259e-122	6.78355e-118	3
CSF2RA	0.597864	0.719	0.453	2.31044e-120	4.86347e-116	3
GABARAPL2	0.593579	0.892	0.67	1.329e-159	2.79754e-155	3
44445	0.59116	0.698	0.417	2.15143e-136	4.52875e-132	3
RPS27	0.590163	0.999	0.998	0	0	3
RPL26	0.588861	0.998	0.994	0	0	3
RUFY3	0.588313	0.481	0.24	1.08434e-105	2.28254e-101	3
GPR1831	0.58799	0.843	0.654	2.50659e-93	5.27638e-89	3
RPS8	0.587779	0.997	0.992	0	0	3
CDC42SE2	0.586994	0.755	0.454	5.00063e-150	1.05263e-145	3
IL1R1	0.585107	0.195	0.054	3.09285e-110	6.51044e-106	3
HINT1	0.582332	0.972	0.847	2.79679e-268	5.88725e-264	3
RPS2	0.582257	0.999	0.991	0	0	3
RPL10	0.579639	1	0.998	0	0	3
DCK	0.579419	0.602	0.343	4.0114e-116	8.44401e-112	3
RPS3	0.578727	0.998	0.99	0	0	3
RPS15A	0.576051	0.999	0.992	0	0	3
GNG7	0.574715	0.258	0.089	7.76846e-108	1.63526e-103	3
STK4	0.573363	0.855	0.633	1.64879e-130	3.4707e-126	3
CDK2AP1	0.572958	0.596	0.315	3.7672e-127	7.92996e-123	3
RPLP0	0.571895	0.994	0.933	0	0	3
PMAIP1	0.5686	0.541	0.288	1.64747e-107	3.46793e-103	3
RPS21	0.56835	0.998	0.985	0	0	3
PLAC81	0.56711	0.651	0.342	3.68272e-140	7.75213e-136	3
RUNX2	0.565213	0.265	0.098	2.03791e-96	4.28981e-92	3
RPL22	0.56282	0.995	0.977	0	0	3
RPL7A	0.562115	0.997	0.984	0	0	3
KCNK6	0.560042	0.523	0.276	1.44843e-105	3.04894e-101	3
RPS27A	0.558836	0.999	0.994	0	0	3
RPS11	0.557408	0.997	0.984	3.73112e-231	7.85401e-227	3
STK17B1	0.557029	0.904	0.659	2.8024e-166	5.89905e-162	3
IL2RG	0.556757	0.616	0.302	1.49813e-153	3.15357e-149	3
SINHCAF	0.555471	0.466	0.235	4.35705e-99	9.17159e-95	3
RPL11	0.554553	0.999	0.997	0	0	3
BATF3	0.553424	0.464	0.155	2.653e-197	5.58456e-193	3
PHACTR1	0.547959	0.751	0.484	4.16216e-120	8.76135e-116	3
CALHM6	0.546685	0.795	0.569	3.36004e-116	7.07288e-112	3
RPL4	0.546515	0.984	0.917	4.81396e-308	1.01334e-303	3
CBFA2T3	0.54271	0.282	0.09	1.42278e-127	2.99494e-123	3
SNAI3	0.540081	0.184	0.06	3.4622e-82	7.28794e-78	3
MYLPF	0.539829	0.134	0.033	1.3537e-90	2.84954e-86	3
ARL14EP	0.537955	0.432	0.216	1.39856e-92	2.94396e-88	3
RPL14	0.53795	0.998	0.98	0	0	3
RPL32	0.536428	0.999	0.996	0	0	3
LGALS21	0.535747	0.824	0.433	1.58786e-177	3.34245e-173	3
TMEM14C	0.535464	0.86	0.61	9.03093e-146	1.90101e-141	3
RFTN1	0.534156	0.299	0.15	3.45179e-59	7.26602e-55	3
PHLDB3	0.533463	0.158	0.044	2.0524e-90	4.3203e-86	3
RPL19	0.532778	0.997	0.994	0	0	3
RPL30	0.531695	0.999	0.996	0	0	3
RPS12	0.530903	0.999	0.995	0	0	3
RPS25	0.5301	0.995	0.984	0	0	3
RPL35A	0.526707	0.997	0.988	0	0	3
AL391069.3	0.526675	0.185	0.062	1.2394e-79	2.60894e-75	3
RPL18A	0.525757	0.998	0.994	0	0	3
PIP4K2A	0.525549	0.644	0.377	1.00578e-113	2.11717e-109	3
ARHGAP5	0.525412	0.435	0.218	2.35512e-91	4.95752e-87	3
EIF2AK4	0.525261	0.448	0.243	1.33416e-80	2.80841e-76	3
BIRC31	0.524092	0.443	0.313	1.11858e-15	2.35461e-11	3
RPL34	0.522182	1	0.996	0	0	3
GLO1	0.520557	0.54	0.306	2.8422e-92	5.98282e-88	3
CRYBG1	0.520476	0.513	0.338	1.21463e-51	2.55679e-47	3
PDCL3	0.520052	0.527	0.311	5.10403e-77	1.0744e-72	3
BZW2	0.516904	0.467	0.228	5.87274e-106	1.23621e-101	3
APEX1	0.515493	0.787	0.52	3.48285e-133	7.33139e-129	3
RPS17	0.514031	0.897	0.731	9.07721e-118	1.91075e-113	3
RPL41	0.512819	1	0.999	0	0	3
RPL37A	0.512524	0.995	0.982	2.36211e-243	4.97225e-239	3
HMGN1	0.511408	0.949	0.709	9.94024e-197	2.09242e-192	3
RPS14	0.509666	0.998	0.995	0	0	3
DHRS9	0.507473	0.178	0.059	1.38997e-76	2.92589e-72	3
CHAF1A	0.505411	0.202	0.075	1.62286e-73	3.41612e-69	3
IL181	0.505073	0.725	0.478	5.49463e-96	1.15662e-91	3
IL16	0.503444	0.481	0.248	1.01177e-94	2.12978e-90	3
LINC02356	0.503383	0.107	0.019	2.0419e-101	4.29821e-97	3
AXL1	0.50155	0.477	0.3	5.89092e-54	1.24004e-49	3
EEF1A1	0.500687	0.999	0.999	0	0	3
CLNS1A	0.500161	0.757	0.492	9.67215e-121	2.03599e-116	3
CLEC9A	4.24503	0.987	0.024	0	0	4
DNASE1L3	4.17212	0.948	0.036	0	0	4
XCR1	3.15712	0.801	0.001	0	0	4
IDO11	3.10792	0.952	0.046	0	0	4
CLNK	2.96213	0.862	0.008	0	0	4
WDFY4	2.77896	0.982	0.181	0	0	4
CPNE3	2.64891	0.989	0.358	0	0	4
C1orf54	2.59834	0.987	0.322	0	0	4
ENPP1	2.44332	0.707	0.012	0	0	4
ASB2	2.42198	0.745	0.029	0	0	4
CADM11	2.41682	0.911	0.108	0	0	4
BATF31	2.41304	0.954	0.151	0	0	4
HLA-DOB1	2.25034	0.824	0.056	0	0	4
SNX3	2.15619	0.996	0.839	0	0	4
IRF8	2.15053	0.995	0.488	0	0	4
CPVL	2.10246	0.999	0.81	0	0	4
FLT31	2.07144	0.845	0.091	0	0	4
RAB7B	2.07102	0.78	0.074	0	0	4
GCSAM	2.06913	0.632	0.009	0	0	4
AIM2	2.06198	0.684	0.047	0	0	4
BTLA	2.00813	0.604	0.009	0	0	4
C1orf21	1.89155	0.681	0.044	0	0	4
P2RY141	1.86954	0.76	0.087	0	0	4
DBN1	1.84945	0.51	0.009	0	0	4
CCND1	1.81269	0.783	0.145	0	0	4
PLCD1	1.79816	0.622	0.042	0	0	4
SLAMF7	1.77484	0.886	0.149	0	0	4
LINC02206	1.75595	0.432	0.004	0	0	4
FKBP1B	1.75371	0.645	0.064	0	0	4
ZNF366	1.73201	0.537	0.022	0	0	4
TMEM14A	1.73103	0.674	0.067	0	0	4
EGLN3	1.64844	0.585	0.045	0	0	4
CCSER1	1.64806	0.517	0.032	0	0	4
TLR101	1.63028	0.652	0.075	0	0	4
NET11	1.62957	0.734	0.126	0	0	4
CST31	1.62742	1	0.993	0	0	4
PAWR	1.6137	0.471	0.008	0	0	4
RUBCNL	1.61189	0.698	0.102	0	0	4
PPM1J	1.60771	0.472	0.01	0	0	4
PLPP1	1.60175	0.529	0.051	0	0	4
TSPAN33	1.59053	0.872	0.278	0	0	4
FBXO27	1.58806	0.396	0.002	0	0	4
RHEX	1.58441	0.402	0.002	0	0	4
TSPAN13	1.56518	0.455	0.026	0	0	4
RGCC1	1.5462	0.971	0.304	0	0	4
LGALS22	1.53188	0.978	0.452	0	0	4
LRRCC1	1.52121	0.523	0.07	0	0	4
SERPINF2	1.51367	0.574	0.068	0	0	4
PTK2	1.48975	0.582	0.056	0	0	4
TACSTD2	1.46314	0.537	0.047	0	0	4
DPP4	1.46193	0.417	0.012	0	0	4
NUBPL	1.45508	0.527	0.055	0	0	4
CCDC126	1.43905	0.594	0.091	0	0	4
SLC46A3	1.43051	0.754	0.175	0	0	4
SHTN1	1.42593	0.966	0.502	0	0	4
PNMA1	1.40751	0.507	0.062	0	0	4
REPIN1	1.40696	0.792	0.2	0	0	4
MYEF2	1.40009	0.385	0.021	0	0	4
SNX22	1.39606	0.333	0.003	0	0	4
NAAA	1.39511	0.901	0.404	7.43601e-272	1.56528e-267	4
VAC14	1.38772	0.716	0.161	0	0	4
NCALD	1.37946	0.356	0.004	0	0	4
BEND5	1.37657	0.399	0.015	0	0	4
MZT2A	1.37495	0.934	0.468	0	0	4
DUSP41	1.36549	0.342	0.067	1.43e-177	3.01014e-173	4
HLA-DPB11	1.36526	0.999	0.924	0	0	4
PPY	1.3389	0.298	0	0	0	4
KCNK61	1.33787	0.822	0.277	5.36171e-299	1.12864e-294	4
CYB5R3	1.31862	0.928	0.417	0	0	4
C12orf451	1.31857	0.728	0.271	7.54705e-194	1.58865e-189	4
CXCR3	1.28611	0.343	0.013	0	0	4
CAMK2D	1.28524	0.841	0.256	0	0	4
CDK2AP11	1.28004	0.855	0.321	7.09307e-306	1.49309e-301	4
HDAC91	1.27681	0.795	0.195	0	0	4
MYCL	1.27131	0.598	0.11	0	0	4
FNBP1	1.26988	0.97	0.543	0	0	4
GNG71	1.26487	0.579	0.084	0	0	4
KIF16B	1.26233	0.585	0.12	7.24056e-304	1.52414e-299	4
MTERF2	1.26209	0.394	0.026	0	0	4
MYLK	1.25416	0.324	0.01	0	0	4
AC090152.1	1.25295	0.32	0.01	0	0	4
ARHGAP20	1.24067	0.3	0.016	0	0	4
PLEKHM3	1.23761	0.463	0.069	0	0	4
AUTS2	1.23628	0.349	0.025	0	0	4
AP3M2	1.21999	0.431	0.05	0	0	4
RGS10	1.21883	0.983	0.786	0	0	4
TOX	1.21854	0.327	0.011	0	0	4
ISG20	1.21556	0.745	0.308	7.92442e-167	1.66809e-162	4
EEF1B21	1.21506	0.995	0.918	0	0	4
IL18R11	1.21413	0.396	0.047	0	0	4
HLA-DPA11	1.20903	1	0.947	0	0	4
C3orf58	1.20632	0.699	0.238	7.29206e-201	1.53498e-196	4
OFD11	1.18703	0.694	0.189	3.25487e-265	6.85151e-261	4
TSPAN2	1.18516	0.396	0.021	0	0	4
PLEKHA5	1.185	0.414	0.052	0	0	4
S100B	1.18222	0.504	0.199	2.41201e-105	5.07729e-101	4
ZEB1	1.17069	0.389	0.041	0	0	4
HLA-DQA21	1.16578	0.674	0.398	6.72211e-90	1.415e-85	4
LYRM4	1.16388	0.682	0.185	5.45839e-269	1.14899e-264	4
NEGR1	1.16299	0.264	0.01	0	0	4
SERPINF1	1.16092	0.738	0.191	1.14457e-306	2.40931e-302	4
CCDC6	1.16041	0.752	0.271	3.94758e-218	8.30966e-214	4
FAM95B1	1.15745	0.256	0.011	0	0	4
CNFN	1.15354	0.429	0.058	0	0	4
HLA-DQB11	1.15333	1	0.854	0	0	4
RAB30	1.15098	0.337	0.02	0	0	4
MAP2K6	1.14127	0.539	0.089	0	0	4
APOL3	1.13727	0.688	0.169	2.24344e-288	4.72244e-284	4
CCDC122	1.13542	0.295	0.007	0	0	4
ERICH5	1.13407	0.26	0.001	0	0	4
LSM6	1.1195	0.942	0.579	2.18788e-279	4.60549e-275	4
LIMA1	1.11897	0.518	0.13	8.40405e-210	1.76905e-205	4
SUSD3	1.10964	0.604	0.155	2.83155e-238	5.96041e-234	4
AL390729.1	1.10668	0.28	0.018	0	0	4
TAP1	1.10018	0.915	0.441	8.13256e-240	1.7119e-235	4
IDO2	1.09808	0.249	0.006	0	0	4
NAP1L1	1.09368	0.973	0.79	7.08934e-258	1.49231e-253	4
FZD3	1.0911	0.254	0.006	0	0	4
BASP11	1.0867	0.984	0.503	2.28421e-303	4.80826e-299	4
PPA11	1.08462	0.967	0.573	3.13946e-286	6.60856e-282	4
BCL61	1.0766	0.816	0.317	3.21197e-205	6.7612e-201	4
C10orf105	1.07644	0.219	0.002	0	0	4
CD226	1.07084	0.426	0.094	2.09753e-188	4.41531e-184	4
SLC38A11	1.06532	0.606	0.104	0	0	4
VAV3	1.047	0.667	0.206	4.65224e-210	9.79296e-206	4
ADAM19	1.04528	0.409	0.057	6.10904e-294	1.28595e-289	4
ANKRD20A4	1.0426	0.227	0.009	0	0	4
RAB33A1	1.04229	0.351	0.039	0	0	4
THEM4	1.03743	0.38	0.068	1.11715e-215	2.3516e-211	4
NCOA7	1.03337	0.726	0.261	1.32751e-201	2.79442e-197	4
CBFA2T31	1.0306	0.5	0.092	2.03796e-269	4.28991e-265	4
CLCN4	1.02899	0.251	0.012	0	0	4
PPP1R14B	1.02765	0.934	0.516	1.28888e-249	2.7131e-245	4
CYYR1	1.02746	0.248	0.005	0	0	4
REC8	1.02661	0.42	0.071	6.06874e-251	1.27747e-246	4
TMEM238	1.01243	0.482	0.107	1.58819e-212	3.34313e-208	4
ICAM31	1.00781	0.917	0.401	7.03531e-250	1.48093e-245	4
RAB32	1.00653	0.943	0.646	6.40687e-234	1.34865e-229	4
AC093673.1	1.0064	0.565	0.14	1.52276e-220	3.20541e-216	4
AGPAT1	1.0029	0.673	0.202	2.14094e-219	4.50668e-215	4
PARM1	1.00184	0.333	0.029	0	0	4
GRAMD2B	0.999286	0.322	0.041	1.21681e-254	2.56138e-250	4
GPT2	0.992082	0.26	0.017	0	0	4
HLA-DQA11	0.990991	0.996	0.786	4.83945e-256	1.0187e-251	4
CDK2AP2	0.989711	0.833	0.397	3.8094e-187	8.01878e-183	4
CIB2	0.987631	0.264	0.014	0	0	4
DENND1B	0.984164	0.71	0.262	1.57149e-179	3.30799e-175	4
P2RY101	0.978516	0.279	0.021	0	0	4
TSTD1	0.970498	0.655	0.223	3.20804e-179	6.75292e-175	4
TAP2	0.968088	0.764	0.309	5.62911e-176	1.18493e-171	4
GPR1571	0.965537	0.161	0.044	4.25111e-50	8.94858e-46	4
IL161	0.965461	0.74	0.251	9.09245e-203	1.91396e-198	4
RHOF1	0.960179	0.627	0.177	6.06934e-210	1.2776e-205	4
QPRT1	0.955335	0.423	0.086	1.7284e-205	3.63828e-201	4
MARCKSL11	0.95386	0.792	0.251	1.75147e-249	3.68685e-245	4
LACC1	0.953162	0.529	0.145	8.43534e-176	1.77564e-171	4
ZNF711	0.951901	0.214	0.001	0	0	4
INPP5F	0.9456	0.405	0.09	1.19356e-173	2.51244e-169	4
AC005162.3	0.939655	0.207	0.017	1.78614e-240	3.75982e-236	4
TMSB4X	0.9367	1	1	0	0	4
IFT20	0.933777	0.82	0.346	3.33753e-197	7.0255e-193	4
RPS231	0.933362	0.998	0.994	0	0	4
UCP2	0.933033	0.943	0.7	1.67293e-209	3.52151e-205	4
NRARP1	0.932555	0.333	0.081	2.08639e-124	4.39186e-120	4
C1QBP	0.930819	0.929	0.538	1.73565e-211	3.65355e-207	4
PAK3	0.928746	0.175	0	0	0	4
CBX6	0.927692	0.484	0.135	2.13702e-156	4.49843e-152	4
NME4	0.925473	0.692	0.269	1.46409e-161	3.0819e-157	4
CDH2	0.922016	0.179	0.003	0	0	4
CCDC26	0.919617	0.22	0.007	0	0	4
THRB	0.919078	0.205	0.006	0	0	4
GYPC1	0.918399	0.865	0.372	2.86687e-216	6.03477e-212	4
TMEM243	0.908495	0.798	0.34	6.31058e-181	1.32838e-176	4
RAMP1	0.906739	0.258	0.028	5.26771e-236	1.10885e-231	4
MAGEF11	0.904101	0.499	0.125	8.23981e-187	1.73448e-182	4
ITGB7	0.902654	0.62	0.179	7.15301e-193	1.50571e-188	4
HSH2D	0.899023	0.516	0.119	6.24531e-207	1.31464e-202	4
MCOLN21	0.897385	0.408	0.089	7.45383e-176	1.56903e-171	4
HLA-DRB11	0.894328	1	0.962	4.28339e-239	9.01654e-235	4
ITPRIPL1	0.893967	0.252	0.024	1.14486e-256	2.40992e-252	4
C20orf27	0.891506	0.877	0.464	4.52092e-176	9.51654e-172	4
CD741	0.89057	1	0.993	0	0	4
ASAP1	0.883713	0.885	0.425	2.78847e-181	5.86973e-177	4
SPATS2	0.879738	0.399	0.101	4.55696e-144	9.59241e-140	4
RPS211	0.879037	0.996	0.986	0	0	4
GSTP1	0.878912	0.989	0.931	6.2126e-302	1.30775e-297	4
KIAA1958	0.876442	0.256	0.035	4.24413e-186	8.93389e-182	4
STK17A	0.875232	0.699	0.23	5.1054e-184	1.07469e-179	4
BUD23	0.875095	0.797	0.34	1.91745e-172	4.03623e-168	4
CLIC21	0.873684	0.582	0.189	1.6872e-152	3.55156e-148	4
BIK	0.872896	0.226	0.012	0	0	4
COL4A4	0.871666	0.149	0.002	0	0	4
LIMD21	0.85822	0.959	0.586	8.10311e-197	1.7057e-192	4
ID21	0.855096	0.963	0.615	1.80353e-155	3.79643e-151	4
[truncated: 920 more rows]
