# Supplementary material for: Single-cell transcriptomic analysis suggests two molecularly distinct subtypes of intrahepatic cholangiocarcinoma
Source: Nat Commun. 2022 Mar 28;13:1642. doi: 10.1038/s41467-022-29164-0 (PMC8960779; doi:10.1038/s41467-022-29164-0)
Supplement: Supplementary file 10 — Supplementary Data 7 [file 41467_2022_29164_MOESM10_ESM.xlsx]

## Sheet: Sheet1
Supplementary Data 7. Differential expression genes between SPP1+ALB+ and SPP1+ALB- tumor cells.
Gene	logFC	logCPM	F score	P-value
ALB	7.97855	10.2649	26337.7	0
NEB	4.44367	8.70641	11358	0
AMBP	4.17888	8.49475	12363.6	0
ORM1	3.93669	8.52468	8792.33	0
RGS5	3.88494	9.08443	7943.24	0
SERPINA1	3.66688	12.846	5660.73	0
CPB2	3.56681	8.0682	12626.4	0
GP2	3.5378	7.88138	9416.05	0
PTGDS	3.52525	8.16778	5913.54	0
LYZ	3.50669	8.45381	7097.34	0
CP	3.44421	8.67914	6617.55	0
SPINK1	3.29714	10.0876	4291.83	0
VTN	3.22767	10.1639	8885.03	0
NTS	3.16631	7.85165	6108.77	0
IGFBP2	3.06908	8.32507	6525	0
IL18	3.06376	8.82065	8209.66	0
NPW	3.05145	7.93951	7168.9	0
APOB	3.00604	7.95345	7794.68	0
FXYD3	3.00371	8.356	8360.07	0
SYT8	2.96769	8.52034	6904.31	0
TCIM	2.85961	8.71576	4912.43	0
A2M	2.83307	7.88804	6740.24	0
GAMT	2.72749	8.55781	7732.9	0
FMO5	2.7263	7.87473	7894.28	0
APOA2	2.7243	7.73374	7105.24	0
ORM2	2.70853	7.84483	6871.15	0
DKK1	2.70189	8.08285	4285.04	0
VSIG2	2.67676	7.81072	7746.77	0
FGA	2.67572	8.47702	4516.54	0
TMEM45A	2.66851	8.0064	4909.07	0
CLDN10	2.65717	9.20463	8023.2	0
CPE	2.64434	7.86971	5541.51	0
AC104461.1	2.6358	7.88239	8329.93	0
C15orf48	2.63058	8.13113	4227.56	0
LGALS4	2.55404	9.27727	6201.49	0
LGALS3	2.55004	9.6291	8313.37	0
CCL20	2.54935	9.11658	3164.1	0
TPM2	2.50131	8.13931	5479.39	0
NDUFA4L2	2.49182	8.20646	3184.43	0
GC	2.49111	7.97216	4514.23	0
APOA1	2.47313	7.71473	6467.03	0
CTSH	2.42593	9.30495	7889.84	0
FN1	2.37899	9.17766	3381.1	0
KRT23	2.37332	8.83208	5074.55	0
CFTR	2.34385	8.03146	3724.74	0
FGG	2.33436	9.12609	2826.25	0
CYB5A	2.31056	9.04619	6551.65	0
IFI27	2.30179	8.15379	3104.55	0
FGB	2.29988	8.31296	2711.27	0
DNALI1	2.27104	8.00267	6515.53	0
SCTR	2.2659	8.2656	5047.74	0
KRT81	2.26203	8.38071	2409.77	0
C8G	2.26145	8.05103	4932.4	0
FAM3B	2.24911	7.96134	5626.53	0
PIK3C2G	2.24112	7.72324	6607.82	0
DDAH1	2.22133	7.85833	6353.6	0
C3	2.21448	9.54803	4552.84	0
S100A14	2.18049	8.79247	5128.05	0
CTSE	2.17938	7.69396	6387.38	0
MLPH	2.17753	7.77274	5562.49	0
APOE	2.17661	8.07752	3926.76	0
TTYH1	2.16743	7.99252	4554.04	0
LDHB	2.16289	8.29899	4436.09	0
ANPEP	2.16173	8.01656	4208.42	0
ASGR2	2.15684	7.917	4010.53	0
MRPS15	2.14622	8.46562	6593.43	0
TM4SF5	2.13602	7.95951	4552.36	0
AKR1B10	2.12767	7.81432	4146.67	0
HSD17B2	2.11016	8.23226	4665.59	0
SORT1	2.10404	7.7797	5454.74	0
AQP1	2.09771	8.89629	3991.36	0
REEP6	2.0947	7.88437	5850.23	0
FLRT2	2.06522	7.72686	5834.75	0
GPX2	2.05972	8.1806	3961.96	0
RGS4	2.05081	7.92071	3339.59	0
MIF	2.04947	9.8936	7078.13	0
MACROD2	2.04522	7.7659	4862.17	0
LBP	2.04184	7.78447	3288.06	0
PSMB2	2.03609	8.78717	6323.42	0
PSMA5	2.02635	8.61371	5630.99	0
IGFBP1	2.02357	9.22603	1915.82	0
CHST4	2.00797	7.7306	5851.71	0
PAH	2.00325	7.69589	6604.26	0
CITED4	1.98126	10.418	5763.43	0
LSM10	1.94548	8.01815	5129.87	0
GATM	1.94306	8.04209	3566.47	0
APOH	1.94016	8.04488	3515.73	0
ASGR1	1.93947	7.703	5330.79	0
TFPI	1.93882	7.82748	3424.97	0
AGR2	1.9366	7.94657	2418.53	0
AP1M2	1.93532	7.86738	4769.53	0
ITIH2	1.93506	8.29501	2181.04	0
CD47	1.93424	8.34488	5076.93	0
SDF2L1	1.89667	8.27604	4317.92	0
SERPINA4	1.89466	7.8405	3784.34	0
TXNDC17	1.88852	8.88675	5806.79	0
GSTM3	1.88697	7.85814	4640.75	0
FDCSP	1.88394	7.77321	1914.41	0
EPHX1	1.87956	8.36756	3516.91	0
KRT7	1.87904	9.90898	3596.34	0
CALD1	1.86338	8.63002	4176.86	0
STARD10	1.86183	8.18947	4734.05	0
GNG5	1.84677	9.5197	7367.34	0
MEAF6	1.84198	8.62687	4594.04	0
NDUFS5	1.84004	9.96882	7698.91	0
NFIA	1.83974	7.86014	3800.27	0
CBR1	1.82705	7.88742	4355.97	0
LPIN2	1.80594	7.79865	3665.08	0
NNMT	1.79322	8.88415	1632.48	0
SYT12	1.79169	7.69061	5012.87	0
DDT	1.78201	8.94528	5212.73	0
MUC6	1.78131	7.68296	3536.93	0
GSTO2	1.76873	7.69629	5441.31	0
SGCB	1.76317	8.06752	3268.8	0
IFI6	1.76149	8.32347	2476.81	0
PLAC4	1.7573	7.98153	1651.23	0
PPT1	1.75579	7.91579	4064.72	0
PON3	1.74614	7.7874	3828.51	0
SPP1	1.74338	12.0694	3650.9	0
TSPAN13	1.73698	7.71088	4562.01	0
SLC12A2	1.72963	8.71243	3056.97	0
VTCN1	1.72352	7.85286	2798.16	0
CLDN7	1.70679	9.14022	3880.25	0
CRIP1	1.70679	8.58253	2685.94	0
TP53INP1	1.70551	7.93159	3174.95	0
CXCL6	1.69534	8.43539	2043.86	0
GALNT3	1.69382	7.84429	3615.52	0
MT2A	1.68924	9.82411	1974.44	0
APOC1	1.6879	7.73605	3392.85	0
HNMT	1.68786	8.56176	4304.53	0
NME2	1.68338	7.90409	3254.05	0
C2CD4A	1.67818	7.76853	2438.15	0
NAPRT	1.67418	8.08493	3241.66	0
NSMCE4A	1.67296	7.8817	3267.92	0
CMBL	1.67048	7.77555	3502.02	0
SNHG25	1.66977	8.5799	2379.53	0
HOMER2	1.66734	8.04574	3554.24	0
CENPM	1.66272	7.6817	3864.32	0
LAMTOR5	1.65921	9.14224	4815.1	0
CXCL5	1.65577	7.80899	2027.43	0
RBP1	1.65195	8.17657	2225.96	0
HIST1H4C	1.64531	8.74683	2915.07	0
SLPI	1.64198	9.343	2480.09	0
KIAA0319L	1.64185	7.99059	3463.23	0
TMEM238	1.6373	8.73332	4961.93	0
GGT6	1.63333	7.67118	4848.45	0
RHOBTB3	1.6245	7.68221	4189.56	0
AL355338.1	1.62235	7.76758	3685.56	0
HACD3	1.6218	8.34893	3932.54	0
CAPS	1.621	8.33314	3393.37	0
CDKN2A	1.61954	7.80103	3014.6	0
AKAP7	1.60773	7.89432	2185.06	0
PAFAH1B3	1.6074	7.98755	3590.46	0
SARS	1.59975	8.33004	3471.15	0
S100A9	1.59832	7.88664	1651.73	0
CXCL1	1.59581	8.74578	1576.94	0
UPK1B	1.59139	7.66066	3579.11	0
LCN2	1.58376	8.06644	1519.42	1.73368077314446e-315
SHROOM3	1.58093	7.82165	3071.12	0
C1S	1.58025	7.98103	2084.28	0
SLC38A11	1.57664	7.65566	4952.48	0
CTNND2	1.57564	7.6753	4630.38	0
TRAPPC3	1.57304	8.12481	3515.95	0
TSPAN6	1.57259	7.95751	3187.4	0
SERPINA6	1.56877	8.00656	2552.94	0
TIMM8B	1.56812	8.20262	3665.64	0
IFI27L2	1.56806	8.02521	3360.46	0
QPRT	1.56396	7.7841	2859.31	0
GOLT1A	1.56065	7.91441	3168.04	0
AZGP1	1.55997	8.02905	2880.48	0
TST	1.55812	8.23946	3435.71	0
BATF	1.5566	7.7029	3153.35	0
CTSF	1.5511	7.68261	4309.04	0
CFH	1.55063	7.86333	1539.35	2.18120101325994e-319
PPA1	1.54815	8.80687	4369.94	0
ALDH2	1.5445	7.90924	2723.94	0
NR5A2	1.5366	7.73891	3316.32	0
HABP2	1.53496	7.81077	2352.29	0
SPINT1-AS1	1.53249	7.89787	3058.81	0
CTSS	1.53197	7.74823	2701.45	0
ANXA9	1.52854	8.06513	3034.75	0
FBLN1	1.52728	7.74554	2445.75	0
LYSMD2	1.52232	7.84609	3159.57	0
METTL7B	1.52119	7.81797	2655.37	0
EPS8L3	1.51996	7.78412	2725.76	0
HLA-DRA	1.51882	8.03251	1741.65	0
RPL39L	1.51807	7.72253	3348.59	0
ARID5B	1.51684	7.84429	2263.6	0
RPL3	1.51023	11.5537	7349.56	0
ADPRHL2	1.50421	7.89415	2818.2	0
SORBS2	1.50335	8.13181	2309.55	0
PNPLA3	1.50139	7.66252	3753.13	0
AC007906.2	1.4934	7.72782	2208.27	0
PCLAF	1.49041	7.68496	2413.33	0
TMPRSS3	1.48529	7.82211	2423.41	0
ATP6V0B	1.485	8.67599	4016.46	0
LIF	1.47651	7.81772	1873.62	0
MGST2	1.47212	8.10881	3027.02	0
ATP5F1D	1.47078	9.30485	4912.66	0
LINC00665	1.46978	7.6799	3686.3	0
C5orf46	1.46476	8.02782	1233.39	6.12984e-259
GSTO1	1.4645	8.61009	3397.15	0
UQCRH	1.46243	9.89185	4676.56	0
NXPH4	1.45746	7.70259	2788.21	0
KRTCAP2	1.45384	9.1387	5144.91	0
ISG15	1.45318	8.1779	1573.37	0
TMEM37	1.45097	8.06166	2298.14	0
ALDH1A1	1.44525	8.02056	1690.08	0
TPD52	1.44483	8.01881	2645.45	0
FDX1	1.44451	8.01655	2801.24	0
HSD11B1	1.43527	7.67261	2475	0
DNAJC15	1.43478	8.00252	2444.05	0
SYNE4	1.43294	7.65995	4318.12	0
C1orf122	1.43269	8.3162	3133.8	0
C1QBP	1.42826	8.42406	3477.76	0
TACSTD2	1.42559	8.71271	1654.7	0
TMA7	1.42553	9.14555	4997.49	0
SLIRP	1.42467	8.60655	3809.83	0
PLPP2	1.41921	8.74421	3485.32	0
DHCR24	1.41508	8.03044	2237.16	0
RAMP1	1.41213	7.96459	1721.52	0
TTR	1.41041	7.74608	1707.74	0
CLDN14	1.41039	7.64672	3595.05	0
EMP2	1.40952	7.97994	2334.48	0
C3orf14	1.40827	7.68742	3053.72	0
GNAI3	1.4058	8.29878	2797.54	0
GNL2	1.4053	7.88267	2486.01	0
THBS1	1.40502	8.42267	1474.94	9.17249e-307
TEKT1	1.40414	7.65027	3373.62	0
ANG	1.40115	7.80542	2298.87	0
RPL22L1	1.39868	9.15423	3621.06	0
CD40	1.39735	7.68305	3312.96	0
SEC11C	1.3936	8.49795	3073.74	0
TIMP1	1.39284	9.83856	4717.85	0
FGFR3	1.39184	8.01859	2221.16	0
MGST1	1.39054	8.96046	2559.33	0
CISD1	1.39023	8.06315	2436.51	0
LYPD6B	1.39014	8.0953	1729	0
RHOC	1.38766	8.97238	3296.58	0
TYMP	1.38648	8.52599	2382.27	0
YBX1	1.38613	9.41955	3944.32	0
CAP1	1.38454	8.57729	3049.07	0
SF3A3	1.38251	8.01032	2456.58	0
RIC3	1.38161	7.68053	2965.03	0
SLC9A3R1	1.37909	8.44043	2269.01	0
PRDX2	1.37637	8.81534	3170.26	0
ACAA2	1.37319	7.96234	2468.78	0
CHI3L1	1.37086	7.7049	1578.36	3.70579e-297
TMEM97	1.37002	7.71366	2608.95	0
FXYD2	1.36823	9.79105	2086.64	0
SUB1	1.3675	9.4365	4161.2	0
UTP11	1.367	7.86676	2508.52	0
EBPL	1.36586	8.41357	2783.6	0
PPIE	1.36555	7.91384	2494.52	0
SH3PXD2A	1.36502	7.69811	2563.21	0
DDIT4	1.36367	8.07195	1728.13	0
RPF1	1.36151	7.86199	2396.6	0
NQO1	1.36051	7.98768	1995.03	0
TSTA3	1.35859	8.23631	2693.63	0
LSR	1.35812	8.47946	2907.3	0
HLA-DRB1	1.35798	8.25502	1239.15	4.34786e-260
AC245297.3	1.35686	8.06358	2539.91	0
PPIB	1.35605	9.65892	4182.8	0
SNRPN	1.35357	8.67764	3153.6	0
PRR34-AS1	1.35281	7.88064	2372.68	0
NME1	1.35251	8.38519	2722.68	0
TMPRSS6	1.34878	7.65004	3206.54	8.92325e-302
KCNK15	1.34722	7.67176	2789.41	0
TPST2	1.34679	7.76865	2245.54	0
PRR15L	1.34634	7.76562	2085.58	0
ST6GAL1	1.34581	7.70023	2486.18	0
LIPH	1.34527	7.72667	2289.06	0
LAP3	1.33782	7.92266	2268.76	0
CGN	1.33582	7.84435	2165.23	0
UCHL3	1.33137	7.79155	2357.36	0
RPS19BP1	1.33099	8.34264	2964.86	0
PRSS8	1.32962	7.82699	2144.03	0
PRKAB2	1.32933	7.80157	2193.18	0
CLDN9	1.32731	7.87105	1528.71	2.63108385059054e-317
IDH2	1.3273	8.07901	2019.93	0
CFHR1	1.32397	7.61943	5411.17	0
SMDT1	1.32013	8.34897	2799	0
EHF	1.31984	7.87542	1941.26	0
NUDT9	1.31943	7.81076	2030.6	0
AHCYL1	1.31821	8.11918	2360.95	0
CLDN1	1.31797	8.95295	2369.13	0
SULT2B1	1.31683	7.68319	2580.64	0
CXCL8	1.31558	10.005	1077.05	1.42943e-227
NDUFB1	1.31537	8.78504	3405.77	0
A1CF	1.31424	7.79473	1948.61	0
SFRP5	1.31387	8.07481	1122.61	9.57134e-237
LGALS1	1.31294	10.0078	1807.85	0
BLNK	1.31278	7.69592	2500.65	0
TMED3	1.31278	8.17585	2701.39	0
EIF3D	1.30876	8.50304	3086.53	0
OSCP1	1.3078	7.716	2428.39	0
AREG	1.30705	8.10676	1179.3	4.0088e-248
PALM3	1.30616	7.67871	2729.06	0
ADGRG6	1.3056	7.69858	2265.76	0
AGTR1	1.30424	7.63562	3870.83	2.15274364996436e-310
MTHFS	1.30341	7.97287	2366.52	0
SELENOM	1.30108	8.49497	2238.82	0
AKIRIN1	1.29907	8.09367	2235.45	0
BLOC1S1	1.29822	8.59733	2977.01	0
TOMM5	1.29811	7.8578	2146.28	0
LMTK3	1.29503	7.77241	1895.39	0
SDHAF3	1.29443	7.68183	2835.36	0
MYCBP	1.29366	7.76292	2296.91	0
ANK3	1.28525	7.66376	2857.36	0
SLC49A3	1.28296	7.70626	2342.16	0
FHL3	1.28109	7.78825	1889.22	0
TMPRSS11E	1.2792	7.62757	4254.26	0
RPS4Y1	1.27902	8.51812	1100.74	2.40195e-232
C1orf53	1.27789	7.72543	2346.68	0
CRELD2	1.27764	7.85389	1940.93	0
HSD17B11	1.27616	8.5851	2117.32	0
UFD1	1.27596	8.02038	2331.88	0
ATOX1	1.27551	8.65506	3039.16	0
IL1RAP	1.27392	7.73879	2009.16	3.1299058664043e-320
POLR2L	1.27262	8.86727	3090.63	0
PDZK1IP1	1.27242	9.09423	1314.44	4.52616e-275
SRPRB	1.27081	7.84584	2024.26	0
CTBS	1.27009	7.86899	2059.18	0
APCS	1.26913	9.93663	903.656	2.16406e-192
SYNGR1	1.2691	7.85457	1858.71	0
ANXA4	1.26822	10.3147	3314.16	0
CHP1	1.26599	8.04995	2146.9	0
RPP25	1.26447	7.67297	2689.11	1.1009734148644e-317
SIPA1	1.26438	7.76208	2240.22	0
FIBP	1.26379	8.05107	2345.24	0
RBX1	1.26362	8.75091	3425.79	0
PF4V1	1.26242	7.65651	2493.13	2.3865e-278
COMT	1.26107	8.66924	3041.91	0
SCD	1.26082	7.8829	1388.4	1.0225e-289
PVT1	1.25997	7.69881	2334.57	0
COX6B1	1.2596	9.78026	5417.78	0
RHOD	1.25863	7.92067	2116.61	0
AKR1A1	1.25737	8.11921	2054.32	0
RPS27L	1.25533	9.8924	3393.31	0
SIL1	1.25509	8.0649	1861.61	0
ZC3H12A	1.25415	8.01631	1760.18	0
SKAP1	1.25334	7.66409	2799.24	1.45201e-297
BEX1	1.25259	7.62771	3846.16	0
ACP5	1.25248	7.65944	2768.41	3.40529e-285
AL049839.2	1.25213	7.72203	1716.4	3.93742e-294
C12orf57	1.25188	9.12717	3990.9	0
TNNI2	1.25052	7.64498	3120.83	0
SLC39A4	1.24981	7.90385	1732.52	0
PDGFRA	1.24768	7.64556	2445.8	4.91281e-252
ETFA	1.24752	8.05482	2210.45	0
HLA-DMA	1.24286	7.78609	1669.35	0
RASD1	1.24189	7.73719	1497.59	3.29918784165226e-311
SPINT1	1.24103	8.39233	2450.42	0
FUOM	1.24051	7.64502	3327.31	3.76466e-301
CHPT1	1.23952	7.96572	1842.69	0
SNU13	1.23874	8.72046	3349.11	0
NOSTRIN	1.23577	7.64503	2864.52	1.23777e-276
CIB2	1.23403	7.70561	2224.31	1.75492117402811e-320
KLK5	1.23278	7.64836	2321.41	4.97854e-247
CHRDL2	1.23263	7.66165	2501.86	1.82494e-304
PPP1R16A	1.2314	8.187	2126.02	0
SMCO4	1.23048	7.87278	1925.38	0
MRPL52	1.2298	8.48481	2560.14	0
NDUFA6	1.22964	8.51262	2684.75	0
NDUFS7	1.22769	8.3447	2604.47	0
MAN1A2	1.22728	7.90031	1942.05	0
C5	1.22686	7.82135	1276.98	1.26412e-267
NCDN	1.22625	7.66954	2611.16	1.5731e-301
MYL12B	1.22552	10.2366	3753.58	0
CD24	1.22496	8.92783	2000.46	0
MANSC1	1.22321	7.69397	2351.77	1.43975e-297
CAPG	1.22221	8.18127	1712.02	0
PET100	1.22211	8.70832	2850.1	0
SERPINA3	1.2221	7.6582	2384.02	5.13756e-279
VWA1	1.22092	7.84891	1619.15	0
DESI1	1.21993	7.78169	1955.76	0
BCL10	1.21755	7.9638	1826.88	0
C2orf72	1.2168	7.69867	2196.16	9.39829e-286
C19orf24	1.21556	8.22045	2326.82	0
SELENOS	1.21548	8.70318	2615.61	0
AADAC	1.21507	7.6236	4056.11	4.29605e-308
ICAM1	1.2124	7.80002	1361.85	1.81726e-284
MYDGF	1.21238	8.80031	2967.33	0
MPST	1.21193	8.2377	2295.26	0
CAPN8	1.2094	7.63409	3140.08	1.39993e-279
FDPS	1.20854	8.44807	2282.85	0
SLC9A3R2	1.20853	7.96607	1564.55	4.94065645841247e-324
PLOD2	1.20622	7.77851	1409.13	8.2651e-294
DEPDC1B	1.20613	7.66049	2169.58	1.33871e-263
SLC1A1	1.20568	7.7993	1693.38	0
AL445524.1	1.20558	7.8284	1754.3	0
FKBP2	1.20478	8.85436	3321.25	0
ATP5F1E	1.20447	10.5489	5758.77	0
TIMM13	1.20288	8.35535	2455.22	0
RPS28	1.20145	11.8974	6338.23	0
NCOA7	1.20139	8.11247	1410.2	5.07667e-294
UQCR10	1.20114	9.25805	3569.11	0
WDR24	1.20107	7.69981	1767.29	3.66123e-247
PTRHD1	1.19868	7.93463	1963.1	0
EIF3I	1.19842	8.20461	2171.41	0
PAQR5	1.19744	7.77799	1831.05	0
SERF2	1.19622	10.8032	6836.19	0
HDAC1	1.19203	7.89447	1885.79	0
G6PC	1.19142	7.62423	3789.97	7.43949e-295
SMAP2	1.19132	7.72788	1912.51	6.91468e-303
KYNU	1.1909	7.66276	2044.39	5.03549e-282
CD69	1.18933	7.69736	1556.61	4.65939e-279
WIPI1	1.18927	7.71346	1969.45	2.37102e-301
GOT1	1.18906	8.13267	1818.27	0
AP2S1	1.18862	8.15173	2222.26	0
DCXR	1.1885	7.89617	1712.15	0
TLR5	1.18748	7.65541	2618.1	6.03994e-271
PLLP	1.18706	8.02241	1622.32	0
CDC42EP1	1.18669	8.28021	2187.89	0
MUC1	1.18654	7.96629	1082.88	9.56042e-229
POLR2I	1.18624	8.47552	2737.38	0
GPAM	1.18579	7.63671	2613.08	1.59372e-229
TMEM125	1.18572	7.70069	1999.89	4.55317e-269
TMEM59	1.18557	9.32405	3973.12	0
LDLR	1.18448	8.0057	1422.87	1.61607e-296
GGT1	1.18427	7.85054	1546.34	9.3526626757748e-321
TTC39C	1.18409	7.80742	1770.08	0
CBLC	1.18258	7.66999	2476.23	6.77802e-293
KRT18	1.18198	11.31	3197.8	0
POLR2F	1.18176	8.14826	2274.73	0
GGCT	1.18146	8.04319	1925.3	0
BST2	1.18108	8.33432	1095.05	3.36969e-231
BID	1.17701	7.80863	1619.28	0
DPM3	1.17506	8.16727	1858.46	0
CRP	1.17506	10.2976	607.438	2.63344e-131
C2CD4B	1.17402	7.64084	2499.36	9.17297e-253
PRDX1	1.17078	9.1838	2783.85	0
PRDX4	1.17072	8.37553	2277.25	0
IRF6	1.16974	7.73627	1802.8	5.83508e-303
LAPTM4B	1.16895	8.18629	1964.96	0
RHEX	1.16784	7.63525	2757.19	1.26849e-265
2021-09-06	1.1668	7.72746	1691.36	4.2816e-280
COMMD1	1.16644	7.87805	1860.62	0
SDCBP2	1.1634	7.87752	1569.33	0
TEN1	1.16324	7.75941	1809.95	0
SUSD4	1.16317	7.65892	2382.69	3.30257e-255
ARL14	1.16274	7.81044	1341.38	2.05533e-280
SQLE	1.16088	7.7804	1403.1	1.28256e-292
CCND3	1.16056	7.7532	1718.52	3.60453005307846e-312
SIGIRR	1.1604	7.96054	1802.64	0
UBD	1.15853	8.01832	916.867	4.36667e-195
LINC01137	1.1582	7.68428	2079.62	4.89104e-278
TRABD	1.1573	7.80579	1783.74	0
LINC00623	1.15548	7.97338	1698.62	0
LAGE3	1.1552	7.82352	1590.7	0
METTL7A	1.15459	7.81057	1504.8	1.26788390997983e-312
ANXA13	1.15459	8.39772	1446.33	3.866e-301
HID1	1.15311	7.68727	2054.27	1.75364e-265
GLCE	1.15263	7.71653	1700.91	5.66656e-249
RAB27B	1.14613	7.725	1512.36	4.38086e-280
OST4	1.14577	9.79377	4178.07	0
CCDC167	1.14234	7.94988	1581.16	0
DEFB1	1.14123	11.7365	2427.2	0
MYEOV	1.14108	7.67234	1631.67	9.43854e-233
MT1X	1.13611	8.69837	861.55	8.73808e-184
MRPL40	1.1355	8.14714	1995.87	0
NXN	1.13506	7.65985	2169.52	4.01941e-233
KCNK9	1.13481	7.65107	2446.41	1.70683e-258
BSPRY	1.13474	7.66571	2332	1.29083e-263
GAPDH	1.13433	11.3003	3075.03	0
NOP10	1.13223	8.64381	2631.16	0
NDUFAF2	1.1304	7.92897	1476.87	3.84361e-307
AC005256.1	1.13015	7.64223	2552.07	8.30182e-245
PHGDH	1.12994	7.72399	1321.94	1.47139e-276
SLC35C1	1.12985	7.65309	2310.46	2.35984e-253
CBWD1	1.12816	7.87723	1727.58	0
ZMPSTE24	1.12674	7.91959	1696.78	0
CYR61	1.12403	9.24657	1038.66	8.09273e-220
RASSF9	1.12224	7.64598	2207.23	6.10284e-234
ATP5MPL	1.12138	8.98454	2918.87	0
PROS1	1.12021	7.88048	1343.15	9.17123e-281
HSD17B1	1.12016	7.6447	2424.82	3.80847e-226
ATP5MC1	1.1199	8.61414	2038.49	0
COLCA2	1.11894	7.68381	1847.33	2.01488e-268
COPE	1.11831	8.45969	2280.14	0
RPS29	1.11823	11.1518	4173.47	0
VGLL3	1.11732	7.69211	1688.8	5.56218e-253
RUNX1	1.11653	7.79711	1328.63	6.91994e-278
DAD1	1.11601	9.10842	3049.3	0
ECHDC2	1.11514	8.04405	1516.62	6.14836978672634e-315
COLCA1	1.11508	7.6738	1961.45	8.98586e-254
SH3YL1	1.11499	8.61943	2190.78	0
SHKBP1	1.11323	7.72467	1781.29	2.90801e-276
MRPS21	1.11045	8.94873	3176.59	0
NPTX2	1.11003	7.6131	4432.02	4.06936e-283
RGS14	1.10976	7.88822	1543.43	3.4737755559098e-320
REX1BD	1.10788	8.22821	2024.19	0
RPS12	1.10753	11.9039	4717.47	0
AC010642.2	1.10616	7.84455	1553.53	3.70549234380935e-322
RHOV	1.106	7.87005	1191.49	1.45687e-250
NR0B2	1.10584	7.73145	1325.43	2.97896e-277
YIF1A	1.10487	8.1779	1861.46	0
RNASEH2C	1.1041	8.01529	1700.47	0
GMDS	1.10391	7.71426	1639.16	2.21478e-253
AL355102.4	1.10164	7.71671	1569.8	6.10473e-259
TRIM7	1.10137	7.62803	3092.98	1.8228e-232
ZNF593	1.10135	7.92947	1677.95	0
MYL12A	1.10122	10.0651	3182.87	0
MRPL37	1.10057	7.86259	1512.7	3.60251148633662e-314
CDC20B	1.10049	7.61147	4047.31	2.91938e-287
SLC1A5	1.09966	7.75298	1429.15	9.72625e-278
PLIN5	1.09926	7.6704	1752.38	7.13453e-247
SMPDL3A	1.09908	7.70762	1687.08	3.02542e-260
SMARCB1	1.09867	7.87273	1623.05	0
F12	1.09753	7.66037	2184.41	6.91108e-242
STXBP6	1.09671	7.73662	1378.47	9.37432e-288
ZMYM4	1.09637	7.98792	1457.34	2.64504e-303
MT1E	1.09628	9.07235	1152.87	7.99186e-243
TIMM10	1.09623	8.13659	1726.6	0
PROM2	1.0958	7.65736	2058.35	3.24319e-220
SOD3	1.09538	7.95023	1173.26	6.51387e-247
MRPL12	1.09511	8.09197	1468.51	1.68467e-305
GLRX	1.09446	7.78889	1180.01	2.88771e-248
NDUFA13	1.09158	9.18956	3106.26	0
RPS8	1.09145	11.858	3758.64	0
NIT2	1.0903	7.97088	1631.23	0
IL7R	1.08987	7.71395	1036.11	2.65089e-219
DEPP1	1.08982	8.30081	1053.34	8.73131e-223
LMAN2	1.0896	8.8177	2775.51	0
AP001453.2	1.08916	7.64781	2239.23	7.32016e-220
BICDL2	1.08904	7.74958	1548.57	2.96614e-273
TXN2	1.08814	8.10179	1825.91	0
ACSL4	1.0879	7.85249	1127.15	1.16784e-237
TM4SF1	1.08623	10.0382	1994.04	0
IMP3	1.0854	8.11584	1757.64	0
CFB	1.08529	8.03522	977.356	2.14447e-207
SLC27A5	1.08463	7.63856	2666.51	5.9669e-246
RAB20	1.08282	7.75036	1545.61	1.73473e-275
SLC43A1	1.08279	7.63705	2690.52	9.11676e-241
RPL36AL	1.08231	9.42821	2884.74	0
TM7SF2	1.08151	7.69022	1729.65	3.24572e-245
ERG28	1.07957	7.83687	1456.59	3.70778e-303
C1orf52	1.07931	7.82074	1446.55	3.50555e-301
P4HB	1.07843	9.13129	2394.26	0
TM7SF3	1.07822	8.17229	1593.13	0
COMMD4	1.0778	7.98515	1656.14	0
PYCR1	1.07768	7.66464	1921.18	1.17826e-233
PGM1	1.07729	7.76265	1379.61	2.4907e-277
NUDT14	1.07717	7.8768	1488.27	0
FURIN	1.07654	7.87815	1197.07	1.11365e-251
RPS19	1.07612	12.2876	5048.84	0
CASC8	1.0752	7.63304	2592.09	8.32767e-240
NDUFV2	1.07488	8.7356	2595.87	0
RPL36	1.0741	11.6173	5013.13	0
PSME2	1.07274	8.23313	1632.4	0
RAMMET	1.07221	8.15146	1747.14	0
KRT86	1.07135	7.64565	1629.95	4.3808e-181
RER1	1.07041	8.20092	1866.12	0
SREBF2	1.07035	7.7312	1512.95	1.51836e-236
AHCY	1.07031	7.81648	1510.86	8.22943117916285e-314
OSTC	1.06944	8.37443	1747.23	0
SMIM22	1.06873	9.04506	1615.8	0
C4BPB	1.06823	7.60315	6260.3	9.2434e-291
DNPH1	1.06634	8.31643	1780.52	0
ALKAL2	1.06618	8.02445	990.794	4.01675e-210
PDCD5	1.06582	8.4794	2094.67	0
PRSS3	1.06575	7.6312	2546.08	2.45686e-234
POLD4	1.06398	7.93079	1351.22	2.30579e-282
AC105411.1	1.06134	7.61598	3610.41	1.63722e-252
MSMO1	1.05981	7.87	1142.73	8.65944e-241
PSMC4	1.05951	8.09646	1634.18	0
FAM89A	1.05465	7.70743	1546.29	4.40611e-237
ZNF677	1.05424	7.60948	4094.57	1.52144e-261
C4orf19	1.05381	7.63368	2651.49	2.10554e-235
AK2	1.05362	8.01457	1486.96	0
SLC29A1	1.05223	7.76239	1329.63	1.20465e-243
ECH1	1.05155	8.32384	1865.82	0
SLC25A5	1.0515	9.03381	1873.24	0
C1orf210	1.05101	7.68229	1732.78	4.64671e-220
MAL2	1.04711	8.63999	1762.12	0
HYOU1	1.04708	7.83373	1156.33	1.61542e-243
OLFM2	1.04653	7.67184	1657.59	2.72839e-232
FAAP20	1.04649	8.03387	1530.95	9.61264495927292e-318
SNRPD3	1.04617	8.48465	2231.44	0
UQCC3	1.04606	7.96683	1482	3.77026e-308
SNHG9	1.04546	7.9706	1083.3	7.86855e-229
NTHL1	1.04516	7.79336	1403.19	2.47538e-276
C8orf82	1.04413	7.80898	1373.08	1.08901e-286
TTC38	1.04338	7.67351	1814.27	3.32523e-221
C19orf81	1.03959	7.70565	1335.62	2.48963e-198
RNF128	1.03851	7.69434	1470.07	2.53664e-203
TJP3	1.03809	7.64188	2268.96	6.57008e-214
PIH1D1	1.03795	8.01309	1543.91	2.80184627756571e-320
ERCC1	1.03731	7.83455	1418.63	1.10772e-295
FAM207A	1.03616	7.787	1415.47	1.10994e-279
BOP1	1.03615	7.69148	1611.09	5.33142e-238
SLC50A1	1.03586	7.89493	1354.66	4.81298e-283
REXO2	1.03373	8.10341	1535.31	1.34827056290555e-318
ATP5ME	1.03351	9.65362	3479.2	0
FAM162A	1.03286	8.35748	1490.77	7.18731051603187e-310
CMSS1	1.03251	7.79951	1295.94	2.14214e-271
SMIM12	1.03247	7.81645	1387.04	1.90256e-289
C8A	1.03238	7.60836	4280.94	3.50292e-225
ACAT1	1.03185	7.8543	1191.5	1.44704e-250
LAMP2	1.03019	8.524	1910.36	0
TMEM258	1.02984	9.3389	2806.83	0
CCDC68	1.02971	7.68766	1464.34	1.24607e-216
PRSS22	1.02962	7.85645	1206.37	1.53502e-253
GRTP1	1.02911	7.73955	1409.23	6.02635e-244
TBC1D10C	1.02834	7.62137	2778.74	2.94865e-194
STAT1	1.02755	8.50182	1209.93	2.97805e-254
GGT7	1.02711	7.6585	1890.83	1.33718e-194
MAP3K13	1.02708	8.1138	1439.58	8.24173e-300
PSMD8	1.02698	8.57824	2161.6	0
BCAS2	1.02562	8.03226	1437.62	2.01172e-299
KIAA1522	1.02516	7.99829	1275.47	2.52388e-267
MXD4	1.02484	7.97806	1341.16	2.2673e-280
GNPNAT1	1.02437	7.71075	1439.38	7.26797e-216
KRT19	1.02393	9.95748	1399.14	7.74348e-292
RAP1GAP	1.02392	7.88633	1230.86	1.96031e-258
APRT	1.02364	8.88956	2272.24	0
INO80C	1.0209	7.74294	1270.51	1.89387e-236
MPZL2	1.02078	7.72639	1352.77	2.19149e-216
SELENOP	1.02035	8.54059	1533.93	2.51009557303999e-318
LMBRD2	1.02027	7.73706	1104.98	1.01359e-181
MRPL34	1.01962	8.17072	1557.37	6.42285339593621e-323
MRPS12	1.01955	8.19333	1622.05	0
TALDO1	1.01892	8.12139	1536.5	7.86631558682599e-319
DCAF13	1.01627	7.90504	1393.85	8.5959e-291
NDUFAF8	1.01563	8.42388	1638.1	0
IRS2	1.01511	8.37666	1317.59	1.07032e-275
PC	1.01185	7.60842	4209.61	2.41054e-221
CPQ	1.01131	7.82058	1230.78	3.40539e-252
RPL28	1.01056	11.807	4397.6	0
KCNMA1	1.01045	7.73219	1056.52	1.99003e-223
APH1B	1.00988	7.75463	1316.31	1.10519e-236
ALDOA	1.00979	7.88124	1313.86	5.89454e-275
TMEM147	1.00909	8.43084	1865.12	0
NUDT8	1.0084	7.77681	1248.54	1.48358e-252
WLS	1.00816	7.67644	1440.09	1.17716e-210
IGF2BP2	1.00771	7.81289	1150.64	2.23726e-242
EXOSC5	1.0066	7.78305	1324.83	1.37441e-274
TSTD1	1.00539	9.17776	2495.97	0
ASS1	1.00518	7.84311	1028.29	1.01672e-217
IQGAP2	1.00475	7.68328	1441.96	5.69733e-221
GGH	1.00357	7.69912	1345.31	3.86293e-210
FASN	1.00268	7.74841	1225.36	7.27892e-241
COX7A2	1.00198	9.24927	2422.74	0
MED31	1.00093	7.85263	1208.54	5.639e-254
DBI	1.00071	9.25573	2393.07	0
PHC2	0.99961	7.96077	1265.64	2.27799e-265
EIF3K	0.998732	9.20252	2746.58	0
YIPF2	0.998343	7.84902	1277.84	8.50181e-268
MRPS28	0.996533	7.86007	1296.18	1.91868e-271
SERBP1	0.996503	8.71587	1956.57	0
TP53I3	0.996129	7.95434	1235.3	2.5512e-259
MMP10	0.995099	7.765	543.906	4.89727e-118
PNKP	0.994158	7.85043	1278.27	6.97435e-268
FRAT2	0.993516	7.81213	1095.15	3.21149e-231
FABP1	0.993352	7.61139	2655.24	4.89264e-200
FUT3	0.992711	7.6236	2505.27	1.6266e-179
CCL4	0.991168	7.90902	687.414	6.34595e-148
NDUFC1	0.991142	8.89862	2270.72	0
QTRT1	0.989996	7.8223	1213.12	1.05485e-252
NAALADL2	0.9895	7.68733	1417.7	3.94076e-190
RAB4A	0.98908	8.27806	1480.02	9.23475e-308
GJB1	0.987982	7.93565	1207.03	1.13224e-253
EBNA1BP2	0.987185	8.01475	1342.16	1.43664e-280
SERPINA5	0.986663	8.1591	1144.84	3.27199e-241
ACADVL	0.98635	8.2307	1466.75	3.73693e-305
MANF	0.986255	8.14612	1193.65	5.37318e-251
NDUFA3	0.982002	8.69075	2123.65	0
RPS17	0.981556	9.08389	1671.9	0
MRPL54	0.981141	8.11201	1476.54	4.45523e-307
COBLL1	0.980888	7.82673	1103.37	7.11773e-233
BIRC3	0.98031	8.37443	845.726	1.52173e-180
CLEC11A	0.979818	7.65177	1728.91	3.01775e-177
TMEM30B	0.979694	7.7323	1209.69	2.31158e-209
ISOC2	0.977496	8.02261	1249.79	3.29208e-262
DIO3OS	0.976197	7.61605	2516.36	2.67651e-163
NDUFA2	0.974621	8.73363	2075.95	0
NEURL3	0.974306	8.03145	896.554	6.09704e-191
PLEKHF1	0.972372	7.6378	1690.66	3.45301e-185
AC013271.1	0.972217	7.80859	958.881	1.21732e-203
RPS21	0.970662	11.2758	3605.22	0
SAMM50	0.970384	7.83633	1258.03	7.50149e-264
ATP5PD	0.970336	9.15591	2252.06	0
EREG	0.970333	7.62776	1928.08	3.79316e-200
CFI	0.969921	7.78684	1009.11	7.77118e-214
GAL3ST1	0.969559	8.03239	999.833	5.89513e-212
GNG12	0.969318	7.81814	1145.59	2.309e-241
UQCC2	0.969157	8.01265	1246.9	1.24041e-261
RPL35A	0.968549	11.3853	4117.6	0
TNFSF10	0.967819	8.38247	819.591	3.48842e-175
IRF3	0.96636	7.94883	1250.85	2.01699e-262
MVB12A	0.966288	7.88721	1272.68	9.062e-267
SRA1	0.96614	7.94426	1213.16	6.73415e-255
PRCP	0.965515	7.70012	1307.71	2.20092e-190
XBP1	0.96481	8.49104	1378.02	1.15006e-287
COX5A	0.964475	8.89184	1904.4	0
EXOSC4	0.963841	7.86285	1223.45	5.91456e-257
TMC5	0.963486	7.65784	1330.66	2.38777e-181
NAPA	0.963198	7.95171	1287.89	8.51417e-270
PLEKHA4	0.962609	7.71443	1168.05	3.88567e-175
PLEK2	0.962551	7.6776	1468.43	4.27335e-193
RDH12	0.962221	7.60709	3794.53	3.24719e-230
NAA38	0.961394	8.3742	1547.61	5.29638372341816e-321
VPS28	0.960789	9.04216	2084.11	0
SLC25A39	0.960755	8.00825	1340.44	3.15688e-280
NDUFB4	0.959701	9.29346	2363.57	0
SORL1	0.958904	7.71127	1089.85	1.31339e-159
ADD3	0.95847	7.87767	1067.21	1.38242e-225
UQCRQ	0.957811	9.3006	1953.95	0
GOLGA8A	0.957121	7.64598	1658.46	7.95743e-165
RAB13	0.956479	8.77974	1731.19	0
HDHD3	0.955667	7.74148	1199.81	9.91111e-216
EFNA1	0.955245	8.19109	1151.64	1.41094e-242
C19orf53	0.954002	8.88836	2282.5	0
CA9	0.953799	8.19401	840.958	1.44348e-179
ATE1	0.95367	7.87135	1031.82	1.96199e-218
SCNN1A	0.953643	7.70223	1152.58	7.14947e-182
SYDE2	0.953569	7.62894	2239.15	4.48265e-184
ZNF281	0.953457	8.17384	1247.24	1.05763e-261
GADD45A	0.953221	8.44743	855.739	1.35277e-182
UBL5	0.953203	9.72133	3486.44	0
IFNGR2	0.953196	7.97498	1153.8	5.18783e-243
NDUFA11	0.952758	8.85886	2268.31	0
RACK1	0.952107	10.6391	3143.21	0
CAPZA1	0.951837	8.1384	1371.8	1.95021e-286
RPL41	0.951673	13.0219	5082.48	0
C1orf216	0.951284	7.62641	2359.32	4.73112e-185
AMPD2	0.950565	7.66356	1555.68	3.13083e-184
MAP2K2	0.950336	8.20865	1518.79	2.3056738221755e-315
FBXL6	0.949141	7.73162	1210.41	4.7787e-207
EMC9	0.948753	7.70829	1269.4	1.5053e-200
C1orf123	0.94861	7.85514	1086.49	1.78392e-229
MACROD1	0.947495	7.76091	1125.91	7.14548e-216
DRAP1	0.947349	8.31145	1593.67	0
TNFRSF21	0.947031	7.79426	964.954	7.09405e-205
RRAGC	0.94674	7.84057	1082.01	1.4324e-228
UBE2L6	0.946718	7.85331	1046.76	1.86789e-221
AGO4	0.94624	7.69105	1298.92	1.98568e-181
CCL15	0.94619	7.60586	3690.77	4.67886e-223
BTF3L4	0.94596	8.20217	1400.81	3.6265e-292
CORO1B	0.945843	7.99533	1261.74	1.36271e-264
ELOB	0.94565	9.59652	3181.63	0
GLRX5	0.945596	8.16699	1406.84	2.33866e-293
SNAP29	0.945032	7.77123	1190.46	5.89503e-223
PPCS	0.944727	8.20177	1355.15	3.85367e-283
NOSIP	0.944301	7.89846	1200.38	2.4197e-252
RPS18	0.942432	12.4824	3536.17	0
TMPRSS13	0.942178	7.6202	2511.81	2.48968e-177
COQ8A	0.940791	7.67555	1413.3	7.84199e-185
TSPO	0.940171	9.25768	2322.25	0
TMEM134	0.939901	8.1189	1335.38	3.16843e-279
GGCX	0.939736	7.84524	1119.59	3.87427e-236
ECI2	0.939397	7.90312	1140.8	2.1144e-240
ATP1A1	0.939171	9.87191	1935.76	0
RPL17	0.939112	8.96857	1620.37	0
PUF60	0.939065	8.29768	1425.63	4.6211e-297
PRRG2	0.938826	7.66123	1549.05	1.97917e-171
LINC02532	0.938567	7.75702	1008.63	9.71493e-214
CUTA	0.93761	8.76077	1861.87	0
ALG3	0.936395	7.83287	1121.76	1.41953e-236
BCO2	0.936367	7.97191	855.364	1.614e-182
SRPX2	0.935765	7.64176	1546.41	2.99525e-151
RPL18A	0.935507	11.5322	3852.3	0
PCDHB2	0.935136	7.60844	3236.71	2.70688e-181
IDUA	0.933677	7.72812	1175.45	7.57481e-198
PSMB6	0.932936	8.60211	1774.37	0
PIM3	0.932677	8.28027	1160.89	1.9655e-244
HOOK2	0.932532	7.98946	1157.73	8.45091e-244
MAP7D1	0.932401	7.90419	1060.38	3.31175e-224
FAAH	0.931608	7.63947	1822.09	6.95622e-167
SUCLG1	0.930937	8.2377	1371.16	2.61137e-286
SLC38A10	0.930907	7.87741	1024.88	4.97197e-217
ZNHIT6	0.930812	7.79049	1040.33	3.71794e-220
SSR3	0.930484	8.72571	1783.45	0
PAK1	0.929785	7.76267	1101.38	1.4849e-198
TLE2	0.929095	7.64958	1570.64	4.69239e-171
S100A4	0.929078	8.07318	694.348	2.32332e-149
PDIA6	0.929016	9.00033	1835.34	0
ADAP1	0.927398	7.67297	1374.17	1.53564e-162
CYC1	0.9272	8.42297	1370.43	3.64642e-286
ALDH1B1	0.926514	7.65208	1471.81	5.68631e-167
PTGFR	0.926404	7.67146	1211.95	5.00959e-181
NDUFS8	0.925441	8.41953	1507.01	4.67734436099682e-313
GCLM	0.924772	7.90131	986.757	2.64881e-209
GALNT18	0.924678	7.75723	1013.3	2.09996e-196
TFAP2A	0.923729	7.72179	951.373	1.22981e-153
HTATIP2	0.923296	8.14506	1179.78	3.21014e-248
ST14	0.921567	7.80803	1011.93	3.39411e-199
CLTB	0.920506	8.61328	1377.89	1.22016e-287
PRR7	0.919728	7.80498	1061.12	2.34222e-224
AL035661.1	0.919335	7.60749	3458.64	9.84234e-192
LAMB3	0.91825	7.92997	800.469	2.95567e-171
SPHK1	0.917328	7.8912	842.237	7.89526e-180
AURKAIP1	0.916706	8.42171	1671.19	0
C15orf61	0.916399	7.88499	1089.73	3.97087e-230
LMO4	0.916071	8.13872	772.753	1.49093e-165
ASL	0.915752	7.99908	1143.43	6.26656e-241
UQCR11	0.91563	9.49832	2234.34	0
SURF2	0.915578	7.80419	1107.24	1.17999e-233
VILL	0.915322	7.63533	1801.6	3.12351e-172
RAN	0.914918	9.20172	1958.18	0
GCA	0.913729	7.95946	1107.08	1.27309e-233
HDHD5	0.913629	7.71318	1198.08	2.3356e-185
RBMS3	0.913607	7.61441	2474	1.9605e-157
BAIAP2L2	0.913075	7.65759	1351.54	3.53179e-148
FKBP11	0.912768	7.86772	954.811	8.18778e-203
GDF15	0.911866	9.0088	597.568	3.00602e-129
CD58	0.911852	8.01757	1121.42	1.65545e-236
GSTP1	0.911508	10.2502	1392.96	1.28302e-290
C1R	0.911204	8.09504	695.55	1.30979e-149
ALDH3A2	0.910913	8.10201	1038.59	8.3759e-220
GALM	0.910239	7.65489	1512.33	1.76239e-178
ACAT2	0.909587	7.66929	1287.66	5.17609e-165
SORD	0.909212	7.6384	1713.06	2.41069e-165
AC026462.3	0.90868	7.63081	1814.94	4.20151e-175
STK40	0.908161	7.72982	1124.29	5.70566e-188
AL451165.2	0.907988	7.66656	1288.77	9.65113e-151
ETHE1	0.907774	7.82854	1063.87	6.5441e-225
MDH1	0.907568	8.53985	1569.71	0
ITGBL1	0.907187	7.60788	2778.84	7.47758e-160
METTL27	0.906641	7.70514	1139.75	6.91141e-181
EIF3G	0.906371	8.70098	1709.83	0
RPP21	0.906242	7.74148	1074.55	1.84475e-183
MYL6B	0.905604	8.04376	1161.53	1.45938e-244
ERICH5	0.905312	7.85552	979.957	6.35842e-208
CAMKMT	0.904836	7.66339	1344.5	2.27763e-149
SCMH1	0.904575	7.69639	1198.66	5.02673e-170
SFTA2	0.904099	7.74619	796.632	1.8174e-170
NDUFAF6	0.902833	7.79051	1037.81	1.20501e-219
CCS	0.90274	7.89086	1083.34	7.71316e-229
PDK4	0.901735	7.77604	706.892	5.88152e-152
ZBTB8OS	0.901695	7.98439	1103.42	6.92646e-233
RTN2	0.901067	7.64379	1605.91	7.66843e-161
MPP6	0.901033	7.89851	985.219	5.4347e-209
IFIT1	0.899304	7.8835	693.127	4.15999e-149
FZD5	0.899171	7.82864	860.483	4.81568e-178
POLR3GL	0.898863	7.89244	1042.62	1.28083e-220
SMYD3	0.898762	7.80213	992.946	1.46991e-210
TMED10	0.898654	8.57353	1486.02	0
PSMB5	0.897947	8.2814	1362.72	1.22375e-284
CD74	0.897945	8.38206	660.581	2.33162e-142
TMEM63A	0.897412	7.86186	897.913	3.21869e-191
TNFSF14	0.897187	7.6587	1194.32	2.08339e-165
ZNHIT2	0.897108	7.69095	1222.58	6.61611e-171
AKR7A2	0.896855	7.87791	1071.27	2.10026e-226
NDUFS3	0.896342	8.12234	1148.45	6.16469e-242
HDDC3	0.895942	7.88406	1041.5	2.1569e-220
GADD45GIP1	0.895704	8.52014	1651.8	0
ZNRD1	0.895124	7.84174	1042.42	1.40915e-220
TC2N	0.894867	7.74842	933.217	8.37671e-180
MRPL41	0.894016	8.41588	1127.19	1.14682e-237
CEBPA	0.893362	7.63269	1646.9	2.62067e-170
MTFP1	0.893302	7.65944	1329.59	1.49199e-148
RNASEK	0.893101	7.73785	936.717	1.04559e-185
NUDCD2	0.893091	7.99966	1044.22	6.08213e-221
PSENEN	0.892968	8.3034	1426.8	2.70921e-297
CYTOR	0.892736	8.51425	1240.47	2.36953e-260
ESRRA	0.89217	7.95218	963.44	1.44053e-204
NHP2	0.891272	8.44009	1386.47	2.46087e-289
SNRPD1	0.890898	8.51563	1602.6	0
CNFN	0.890677	7.75264	904.539	3.67328e-169
RPL5	0.890588	10.8052	2862.09	0
EIF5A	0.889907	8.31714	1250.23	2.68943e-262
LGALSL	0.887491	7.6695	1240.48	3.64072e-149
NDUFA7	0.887354	8.09693	1127.06	1.21895e-237
CAT	0.88714	7.71577	1065.61	3.17509e-182
SPATA18	0.886606	7.644	1422.63	7.95927e-159
DEGS2	0.886259	7.75297	889.021	2.10741e-189
HMOX2	0.88568	7.80475	1008.85	8.23395e-210
SMIM14	0.885533	8.15685	1066.89	1.60423e-225
LEO1	0.885522	7.7937	1013.07	1.70287e-209
PEPD	0.885172	7.84157	1026.51	2.32809e-217
TAF12	0.884443	7.74266	1023.03	6.2217e-169
CHMP2B	0.884024	7.98753	1028.44	9.45556e-218
SEC22B	0.883566	7.93204	1000.71	3.90857e-212
FRMD8	0.882532	7.68474	1135.93	1.53115e-147
SERINC2	0.881992	8.34526	1030.41	3.78459e-218
ALG5	0.881366	8.06148	1117.07	1.24432e-235
PAM16	0.880976	7.626	1973.52	6.34993e-165
BOLA3	0.87994	8.21031	1108.44	6.76884e-234
TFG	0.879382	8.21114	1239.77	3.26786e-260
CARD16	0.879304	7.67962	968.209	1.35983e-155
CPT2	0.879072	7.67236	1218.66	3.35933e-157
PRKACB	0.878286	7.6749	1156.96	5.52614e-158
RPN2	0.877501	8.5372	1448.29	1.59535e-301
ITIH4	0.877442	7.60344	3312.39	2.77694e-182
MGAT1	0.877436	7.8958	912.647	3.16807e-194
BOK	0.877277	7.75888	945.245	2.65372e-170
RPS9	0.877153	11.1966	3499.49	0
MED8	0.876505	7.81129	956.041	4.6013e-203
CCDC85B	0.876347	7.8398	943.263	1.83111e-200
RPL34	0.876275	11.3879	3156.68	0
BZW2	0.875947	7.8701	926.18	5.51801e-197
HSD17B10	0.875301	8.03902	1108.57	6.38587e-234
MCRIP1	0.875003	7.97281	974.061	1.00127e-206
PHF5A	0.874725	7.75345	996.531	3.05192e-177
TRIT1	0.874359	7.67358	1228.4	2.85313e-155
CMPK1	0.874338	8.4304	1256.16	1.76309e-263
EIF3L	0.874211	8.41864	1381.57	2.28875e-288
BGN	0.873901	7.68845	737.99	1.73809e-119
BCAM	0.873891	7.98306	892.572	3.96545e-190
FDX2	0.873847	7.72237	1072.15	3.19104e-171
AL138826.1	0.87247	7.64482	1211.71	2.42937e-146
NDUFA12	0.872431	8.60734	1441.93	2.84587e-300
ARSA	0.872197	7.65596	1343.14	8.74588e-145
RPS10	0.871407	10.7964	2577.24	0
CNIH1	0.870738	7.96474	946.858	3.39638e-201
TOMM22	0.870468	8.23804	1277.89	8.31792e-268
CALR	0.869888	9.31712	1458.05	1.91831e-303
ADSL	0.869851	7.68249	1185.6	1.63393e-156
CRB3	0.869274	7.98878	1044.61	5.07196e-221
TMEM61	0.869006	7.6214	1974.6	1.36488e-156
MTCH2	0.868772	7.93071	1017.24	1.75003e-215
HEBP2	0.868623	8.30033	1182.1	1.10482e-248
NT5DC2	0.868146	7.69472	1009.48	2.78465e-149
RPL24	0.867428	11.392	3213.98	0
PTPMT1	0.867168	7.80942	973.654	1.21142e-206
TUFM	0.867139	8.45248	1418.09	1.41278e-295
SLC26A9	0.866479	7.59406	5380.76	2.18596e-234
DRAM2	0.866214	7.90007	970.561	5.14736e-206
PGP	0.86618	7.86075	910.237	9.82615e-194
TMED9	0.865793	8.77715	1559.5	2.47032822920623e-323
NUDT5	0.865124	7.95657	1044.58	5.1514e-221
RAB40B	0.864277	7.71472	981.685	8.66816e-165
TMEM205	0.863916	8.57098	1452.9	1.9733e-302
FIGN	0.86344	7.60585	2976.56	4.66772e-168
BAALC	0.863115	7.59779	3682.98	2.05167e-200
TSEN54	0.862749	7.71766	1007.68	2.61196e-169
RBP5	0.862354	7.61794	1783.87	9.37889e-150
C4orf3	0.861527	8.38485	1143.61	5.77726e-241
NBPF14	0.860546	7.81941	926.369	5.04917e-197
EEF1AKMT4	0.860528	7.61785	2158.64	5.87804e-160
CD52	0.860493	7.66172	1056.61	1.33683e-154
PTS	0.860015	8.07325	1033.02	1.12049e-218
PON2	0.859607	8.61051	1231.49	1.47284e-258
THRAP3	0.858516	8.31062	1204.18	4.20728e-253
SEC11A	0.856981	9.05781	2016.83	0
RPS5	0.856777	10.9032	2670.43	0
MARVELD3	0.856275	7.72924	924.968	4.08655e-166
PTTG1	0.856089	7.77403	499.749	8.88489e-109
MFSD3	0.855222	7.65447	1328.72	2.85739e-144
RBBP4	0.853915	8.10549	930.85	6.17126e-198
RPL8	0.853557	11.9648	2743.11	0
EIF6	0.853337	8.34036	1285.89	2.12525e-269
MRPL27	0.853141	8.03746	1046.39	2.22093e-221
BX284668.5	0.852993	7.77685	826.347	2.97414e-156
AFMID	0.852544	7.75447	896.978	2.18019e-171
PSMA4	0.85214	8.3798	1276.14	1.85707e-267
VPS51	0.851968	7.862	947.662	2.33072e-201
MRPL11	0.851765	8.06018	1089.57	4.27319e-230
HCST	0.850767	7.65259	1175	7.56528e-146
PABPC4	0.850613	8.30215	1092.72	9.94165e-231
OCIAD1	0.850113	8.67768	1459.4	1.04092e-303
S100A13	0.849337	8.95722	1067.82	1.04218e-225
PPDPF	0.849136	9.87196	1928.05	0
TAF13	0.8486	7.73442	952.306	1.18087e-159
C1orf109	0.848281	7.66638	1197.35	1.34571e-150
HIST1H1C	0.847774	8.74537	763.341	1.29595e-163
MUM1	0.84719	7.96377	926.209	5.44429e-197
ATXN10	0.846966	7.99294	1006.14	3.10993e-213
THOC7	0.846891	8.03801	1046.9	1.74703e-221
CPD	0.846777	7.87589	842.772	6.13341e-180
MYH14	0.846541	7.80757	843.871	3.61134e-179
PCSK6	0.846537	7.63908	1314.48	1.01235e-123
PDE4DIP	0.846339	7.74272	918.616	2.48127e-158
KNG1	0.845544	7.59324	4881.65	1.71378e-209
MYO10	0.844583	7.90391	683.993	3.24646e-147
SCP2	0.844527	8.53433	1351.4	2.12799e-282
BEX2	0.844103	7.94971	823.603	5.23724e-176
SULF1	0.844077	7.61962	1782.19	4.56664e-153
CHMP3	0.844002	8.3593	1281.85	1.3546e-268
TMEM161A	0.843979	7.69472	1050.93	5.53467e-149
ZNF524	0.843801	7.85497	908.631	2.08951e-193
C14orf119	0.843451	7.84463	923.719	1.75134e-196
YRDC	0.842708	7.77694	912.424	3.23394e-192
UCK2	0.842608	7.72207	983.981	3.59473e-157
DNAJC12	0.842033	7.63514	1248.04	7.77782e-137
RPAIN	0.841972	7.93057	890.526	1.03829e-189
ZNF444	0.841638	7.74863	939.948	3.55527e-168
SRRD	0.840649	7.71886	980.648	4.64611e-159
STAP2	0.839759	7.80135	893.97	9.78001e-186
C19orf70	0.839304	8.7953	1625.16	0
CCT3	0.838478	8.91521	1440.89	4.56426e-300
LGALS7B	0.837231	7.59426	4342.26	7.7028e-184
KLC3	0.836986	7.63771	1453.23	7.55162e-140
SELENBP1	0.836468	7.64538	1297.28	4.93703e-140
RCN2	0.836189	8.16138	1062.2	1.42068e-224
STX10	0.834994	7.8627	908.14	2.63184e-193
CRIPT	0.834832	7.9119	930.769	6.40766e-198
COX17	0.83472	8.71208	1456.29	4.24741e-303
MIR4435-2HG	0.834578	8.24306	928.032	2.3137e-197
ZNRF1	0.834574	7.69061	1014.88	7.54339e-149
UBE2E2	0.834556	7.67414	1127.07	1.49483e-151
SERPINF1	0.834413	7.60958	2248.1	9.97557e-155
CFAP65	0.834257	7.62333	1604.89	9.19209e-121
GPR108	0.833903	8.0399	976.558	3.11429e-207
HMG20B	0.833247	7.89293	918.849	1.72243e-195
COPS9	0.833047	8.9549	1737.28	0
PRAP1	0.832824	7.59741	3364.14	9.4593e-185
KDELR3	0.832238	7.82173	806.566	1.65093e-172
ENTPD3	0.83136	7.5932	5313.66	1.03937e-203
ELOVL1	0.831058	7.85338	853.906	3.21028e-182
PSMC3	0.830836	8.02349	949.941	8.01202e-202
B4GALT2	0.830777	7.6716	1107.24	2.62644e-140
ZFP36L1	0.83027	8.69205	763.24	1.35971e-163
GBP1	0.829843	7.72235	712.308	4.45732e-153
PIK3IP1	0.829725	7.697	915.041	9.31565e-144
MMD	0.828587	7.75783	748.512	5.76428e-150
SSSCA1	0.828437	7.96984	912.069	4.15556e-194
SNUPN	0.828101	7.79646	873.393	6.82095e-171
TENT5A	0.828064	7.72021	787.339	6.24566e-142
MINOS1	0.828015	8.50238	1307.11	1.29155e-273
GALK2	0.827493	7.77134	863.31	4.76337e-164
DGCR6L	0.827372	7.85789	889.956	1.35747e-189
DHCR7	0.827372	7.66923	1031.23	9.83121e-135
CCDC107	0.827264	8.18188	940.307	7.31697e-200
AL390066.1	0.827213	7.59867	3560.48	5.94552e-166
NDUFC2	0.827208	8.80723	1733.32	0
PARD6A	0.826762	7.64013	1395.55	2.18608e-139
TECR	0.826633	8.17316	1063.76	6.87914e-225
TFF2	0.826606	7.67907	611.799	3.25107e-132
FOXA3	0.82639	7.60663	2655.9	1.23292e-159
RDH11	0.826331	7.8124	806.481	1.71868e-172
ADH1C	0.826293	7.60264	2679.68	4.32538e-192
ACYP2	0.826192	7.71272	917.224	8.95432e-142
AIG1	0.825943	8.03846	962.821	1.92513e-204
POLR3H	0.825888	7.65902	1189.95	1.30648e-138
METTL5	0.825788	8.23036	1163.5	5.8813e-245
PCYT2	0.825504	7.74989	839.016	8.83508e-170
CTSC	0.825372	8.78151	618.687	1.19551e-133
WDR18	0.825007	7.77281	897.63	4.27638e-169
NR1H4	0.824509	7.73469	815.936	5.00541e-169
ATP5MG	0.824389	9.66891	2612.55	0
NR2F6	0.823108	8.08214	1007.1	1.98191e-213
IYD	0.82309	7.60694	2549.73	6.61049e-152
POLR2K	0.822863	8.54964	1309.59	4.14655e-274
SLC30A10	0.822422	7.66443	1051.3	9.95834e-128
PCDH1	0.822115	7.70257	870.352	1.0759e-122
CTGF	0.821958	8.22806	491.723	4.3126e-107
RGL2	0.821722	7.75303	859.983	2.45531e-147
OSBPL9	0.821637	7.88965	831.558	1.2218e-177
TRIM15	0.821278	7.64699	1215.05	2.17335e-129
MVD	0.821237	7.68876	869.848	3.19656e-121
ANGPTL4	0.820601	7.70705	588.298	1.63342e-126
TPGS1	0.820233	7.92704	907.73	3.19162e-193
COMMD8	0.820226	7.74874	894.852	2.03181e-167
CHD1L	0.820075	7.71231	915.958	1.53508e-145
MED21	0.820047	7.86198	869.013	2.5962e-185
LRPAP1	0.819892	8.37819	1184.35	3.89858e-249
NMRAL1	0.819761	7.75778	898.67	3.1388e-161
CTHRC1	0.819634	7.61143	1955.26	5.44218e-131
TTN	0.819415	7.61339	1976.27	1.38312e-145
OCLN	0.818833	8.1114	840.018	2.2501e-179
COX8A	0.818711	9.57906	1939.97	0
RAB11A	0.818641	8.44253	1222.72	8.2903e-257
MRPL15	0.818462	8.18892	949.852	8.35388e-202
HM13	0.818285	8.28921	1074.1	5.63103e-227
ALKBH2	0.817756	7.66249	1138.21	1.87937e-137
LLGL2	0.817162	8.1	889.457	1.71631e-189
TMC6	0.816915	7.76837	791.834	1.74553e-156
ZSCAN16-AS1	0.816895	7.76437	775.995	2.80099e-144
IFITM3	0.816851	9.8744	1049.05	6.44136e-222
RANGAP1	0.816592	7.95156	832.544	7.6673e-178
MMP7	0.81648	9.20936	362.681	7.63636e-80
SAT2	0.816159	8.16161	899.626	1.43865e-191
LRG1	0.81591	7.83337	733.21	2.13283e-157
TXNL1	0.815796	8.23764	1055.09	3.87269e-223
OAZ1	0.815711	9.77286	2117	0
RABAC1	0.815105	8.64577	1326.32	1.98931e-277
B3GALT2	0.814536	7.60047	3004.47	4.72828e-166
TMPRSS4	0.814089	7.60648	2104.02	2.29934e-119
LSM7	0.813893	8.64853	1439.65	8.00566e-300
SLC18B1	0.813783	7.63023	1482.14	2.15909e-134
ITGAE	0.813673	7.83132	827.135	5.55533e-176
FOXJ1	0.813629	7.70219	794.526	1.4897e-125
TM2D1	0.813572	8.00045	926.181	5.51439e-197
NUDT4	0.812735	7.75169	791.424	4.69814e-157
CSRP1	0.812164	8.04816	866.661	7.86252e-185
MRPL46	0.812157	7.85384	877.1	5.75853e-187
DDX39A	0.812021	8.01698	871.462	8.18816e-186
TRAF7	0.811285	7.76263	858.793	1.02915e-156
DUT	0.81099	8.48639	1172.04	1.14389e-246
SERP1	0.810306	8.8091	1391.11	2.9809e-290
TMEM223	0.81026	7.85333	854.918	1.9917e-182
LURAP1L	0.810232	8.01757	759.65	7.47086e-163
SNRPG	0.809632	8.92046	1640.48	0
COX5B	0.809588	9.83436	2082.23	0
EEF1D	0.809329	10.3542	2131.67	0
CLPP	0.808874	7.92877	908.796	1.93378e-193
C19orf33	0.808684	8.75358	683.441	4.22508e-147
RTCB	0.808608	7.88742	885.759	9.77644e-189
MID1IP1	0.808177	7.86494	708.961	2.1955e-152
SLC22A15	0.808048	7.62226	1643.05	9.04906e-124
SIKE1	0.807872	7.83507	822.463	8.97432e-176
SLC35F2	0.807745	7.64182	1245.2	9.50186e-121
FAU	0.807699	11.1693	3357.86	0
CHCHD6	0.807368	7.70108	888.088	6.31282e-129
CSDE1	0.807214	8.65182	1320.18	3.2858e-276
GPSM3	0.807041	7.62249	1673.69	1.45614e-134
PLGLB1	0.806952	7.59933	3243.74	6.65266e-163
UQCRFS1	0.806851	8.45681	1169.04	4.57221e-246
PI3	0.806427	7.63016	1073.06	5.43694e-128
SDC4	0.806105	8.55375	1055.47	3.23871e-223
TIGAR	0.80589	7.66409	1072.84	2.58576e-134
CHMP2A	0.805187	8.72557	1538.31	3.4849908460704e-319
DCAF11	0.804882	7.6922	960.996	1.21713e-140
EML2	0.804266	7.71229	903.505	1.12867e-139
IFT172	0.803923	7.84291	701.952	6.19311e-151
PDIA5	0.803833	7.71128	853.002	1.3468e-127
FARSA	0.803796	7.7582	846.489	1.00114e-151
FDFT1	0.803656	7.88718	738.116	2.0695e-158
IMP4	0.802963	8.00027	913.83	1.81805e-194
TXNL4A	0.80277	8.16234	1009.2	7.4374e-214
SCPEP1	0.802605	7.60511	2514.73	4.67976e-138
TNNI3	0.802555	7.60338	2583.84	1.63908e-142
PABPC1L	0.802021	7.68244	910.06	2.79989e-120
RAB25	0.801755	8.63102	1193.66	5.34138e-251
TMPRSS2	0.801243	7.67291	967.683	6.48676e-126
TBCB	0.801234	8.25935	1052.38	1.3631e-222
FGGY	0.801069	7.86623	746.598	3.67454e-160
RPS3	0.800692	11.4507	2549.86	0
SALL1	0.800325	7.64138	1261.85	1.94004e-126
ALDH4A1	0.800274	7.61766	1762.59	8.92768e-134
SMIM20	0.800237	7.96743	894.914	1.31833e-190
CARHSP1	0.799957	8.57157	1228.31	6.34177e-258
SPRYD4	0.799549	7.68017	996.796	1.44858e-135
PSMB3	0.799336	8.55858	1296.64	1.55578e-271
ATP5F1A	0.798989	8.73455	1092.02	1.37412e-230
PDCD4	0.798712	7.95903	754.386	9.09583e-162
HAX1	0.798341	8.41763	1188.73	5.18642e-250
H1F0	0.798293	8.20978	725.005	1.05703e-155
AAK1	0.798175	8.19957	842.772	6.13216e-180
SRP14	0.798085	10.0128	2759.8	0
TMEM160	0.797099	8.07519	870.339	1.39017e-185
VIL1	0.79696	7.87597	551.306	1.38421e-119
SLC17A9	0.796935	7.63996	1189.95	2.25201e-111
HLTF	0.796885	7.79998	729.93	1.01523e-156
UXT	0.796855	8.37372	1181.96	1.17819e-248
ASNA1	0.796704	8.04852	933.73	1.59838e-198
LINP1	0.796581	7.74546	664.684	3.2811e-143
TDRD1	0.795863	7.59266	4813.55	1.90878e-184
SYNGR2	0.795787	8.201	812.534	9.81087e-174
SAC3D1	0.795525	7.72466	811.394	2.30971e-138
CARS2	0.79454	7.75895	821.107	1.69253e-146
MRPL36	0.79443	8.13323	900.658	8.85399e-192
NCF2	0.7942	7.76056	610.302	6.66522e-132
MCM5	0.793966	7.65441	1060.4	6.28308e-124
GTF3A	0.791951	8.15091	875.467	1.24209e-186
BLOC1S4	0.791622	7.85708	815.126	2.88001e-174
CLDN4	0.791343	9.05609	799.47	4.74182e-171
NECTIN4	0.790775	7.74482	702.92	8.59399e-140
ATP5PB	0.790769	8.21566	899.078	1.86125e-191
LYRM4	0.790696	7.87326	777.983	1.24917e-166
ATP5MD	0.790629	9.67159	1935.92	0
LAMP1	0.79026	8.31752	1008.44	1.06042e-213
MRPL23	0.790226	7.98905	881.46	7.39266e-188
COX7A2L	0.790091	8.8431	1510.65	9.08532395638888e-314
PHB2	0.789503	8.45462	1162.95	7.60405e-245
TMEM167B	0.789101	7.765	803.099	1.82768e-153
SERPING1	0.788985	9.07788	900.628	8.97949e-192
POLR2H	0.788977	8.12164	922.94	2.52416e-196
HRG	0.788903	7.59444	3500.17	6.73752e-154
KRT8	0.788703	10.7782	1618.62	0
EVA1B	0.788484	7.9189	737.793	2.41367e-158
ETFB	0.787936	8.95014	1086.04	2.19784e-229
ERI3	0.787806	7.82228	770.706	3.93589e-165
ANKRD39	0.787671	7.75058	834.266	1.29456e-149
SMIM4	0.787406	7.81945	773.876	8.75552e-166
PES1	0.787116	7.69668	869.227	1.5503e-123
RSL24D1	0.7871	8.71807	1257.73	8.58971e-264
ACTR10	0.786637	7.95207	830.008	2.53994e-177
CISD2	0.78623	7.99921	782.102	1.77253e-167
DPP7	0.786097	8.11248	877.216	5.45031e-187
DNAJC19	0.785713	8.26089	1018.04	1.20527e-215
SLC52A2	0.785683	7.92686	806.393	1.79119e-172
RSU1	0.785618	7.77372	745.502	3.05254e-140
NPTN	0.785285	7.99758	851.089	1.21204e-181
RNF43	0.785207	7.64171	1093.54	3.98026e-103
RAB8B	0.784825	7.77321	729.887	5.0558e-137
FDXR	0.784491	7.73829	779.418	6.56535e-157
RNF181	0.784163	8.2813	1075.54	2.87898e-227
PLIN2	0.783693	7.76604	685.15	2.19952e-146
NUP50-DT	0.783283	7.62745	1470.54	1.31026e-123
PRSS23	0.783281	8.07871	527.57	1.29311e-114
GSTM4	0.782977	7.73251	781.867	1.79164e-145
PLEKHB1	0.782242	7.77261	760.901	2.68519e-161
TMEM191B	0.781975	7.72951	728.07	1.72216e-118
LYPD1	0.781689	7.71868	694.917	3.85649e-128
AGO3	0.781649	7.84836	742.832	2.20047e-159
CNN2	0.781449	7.7622	690.164	2.08107e-132
NPM3	0.780471	7.79629	746.155	4.53712e-160
Z93930.2	0.780374	7.67726	881.461	4.40106e-117
CLDN2	0.780333	7.61836	1397.22	2.53733e-126
DNAJB11	0.780274	8.06612	828.754	4.5935e-177
SRGN	0.780134	7.77923	510.781	4.29233e-111
AGAP2-AS1	0.78012	7.65614	1050.1	5.82415e-118
RORC	0.779113	7.63259	1308.87	3.86134e-119
NDUFB9	0.778466	8.8744	1386.75	2.16277e-289
NDUFB5	0.778452	8.61846	1075.93	2.40183e-227
DHRS7	0.777749	8.50332	1075.55	2.86483e-227
ALKAL1	0.777398	7.64504	1094.26	1.50923e-133
AP1B1	0.776919	7.6652	968.234	2.53868e-112
RBM47	0.776763	8.08082	809.422	4.27488e-173
CHCHD1	0.776723	8.11468	940.36	7.13687e-200
EEF1A2	0.776298	8.36438	780.738	3.38295e-167
SLC25A3	0.776158	9.45473	1387.27	1.70663e-289
ST20	0.775853	7.69438	837.892	1.85431e-114
RPLP1	0.775816	12.5801	3282.77	0
FGL1	0.775571	7.66359	743.234	1.19544e-116
SSU72	0.775285	8.14092	962.706	2.03114e-204
SSR4	0.774798	9.48353	1493.74	1.87864958938768e-310
MUC13	0.774742	7.61347	1696.1	2.88708e-131
NFYC	0.774712	7.77246	781.152	3.06432e-151
UBL7	0.774553	7.71724	821.909	3.4394e-125
SHARPIN	0.77431	8.07073	839.173	3.35212e-179
HSPG2	0.774052	7.76001	712.133	1.356e-132
SLC25A10	0.773796	7.63403	1266.1	5.15292e-123
RPS27	0.773474	12.9756	2684.87	0
DMKN	0.773432	8.72372	1232.42	9.57386e-259
EPS8L1	0.772958	7.71666	795.139	1.38814e-123
EEF1A1	0.772942	12.2161	2877.24	0
GCAT	0.772365	7.61107	1938.11	1.26203e-128
THAP7	0.772154	7.7559	782.686	9.28339e-147
MRPS11	0.77194	7.92485	814.815	3.33521e-174
GSTT2B	0.771592	7.63273	1329.63	4.07301e-128
AGMO	0.769824	7.61119	1975.02	1.15688e-130
CNTNAP5	0.769814	7.58838	6426.46	2.42953e-203
ABHD2	0.76975	8.04016	759.115	9.63182e-163
ARF5	0.768904	8.4692	1155.02	2.95903e-243
SHMT1	0.768774	7.63779	1232.71	9.5463e-123
ARPC5L	0.767585	7.99167	816.32	1.63713e-174
EPPK1	0.767454	7.75235	626.793	1.83544e-110
AGRN	0.767229	8.11917	688.924	3.08752e-148
ZNF787	0.767205	7.77853	774.625	2.51358e-152
TMSB10	0.76678	13.1202	1628.91	0
SEC61G	0.76654	9.58865	1275.37	2.6341e-267
CXCR4	0.766055	7.82618	482.239	4.24999e-105
SSBP3	0.765989	7.71509	725.812	6.12232e-122
UAP1	0.765973	7.77983	746.219	3.41995e-149
CD320	0.765902	7.71255	779.901	1.82222e-121
MRPL57	0.764814	8.27657	963.119	1.67464e-204
GBP2	0.764614	7.99961	529.977	4.04859e-115
C19orf25	0.764216	7.82239	737.439	2.85531e-158
UBXN1	0.764112	8.51573	1140.86	2.05725e-240
FKBP14	0.764066	7.64199	1086.07	3.59005e-116
MAGI1	0.764054	7.79417	685.781	1.38348e-147
C8orf59	0.763746	8.71947	1358.46	8.49156e-284
IFT27	0.763189	7.79297	736.333	8.21564e-141
USF2	0.763114	7.91216	770.169	5.07884e-165
KIF9	0.763015	7.82766	733.62	1.75531e-157
PPP1R1C	0.762701	7.59943	2649.87	4.19235e-127
ACP2	0.762223	7.66742	946.951	1.39427e-121
MCCC2	0.762157	7.8431	674.574	3.42073e-145
LSM4	0.762116	8.33512	987.403	1.95793e-209
GGA1	0.762031	7.773	727.317	1.37993e-141
MOB3B	0.76175	7.66797	918.485	2.46782e-121
ENDOG	0.761554	7.78516	650.302	3.17902e-140
TAP1	0.761052	7.83901	640.531	3.41024e-138
PPP1CA	0.760639	8.1658	883.025	3.54032e-188
RPL4	0.760447	9.87655	2110.38	0
YIPF1	0.760217	7.66829	942.508	3.5588e-114
SHMT2	0.760069	7.82787	661.155	1.77175e-142
SLC43A3	0.760009	7.70202	782.013	3.16374e-122
CAPN1	0.759957	8.03466	806.401	1.78421e-172
ERN1	0.75979	7.76582	652.576	1.10345e-125
BBOX1	0.759703	7.6399	943.388	5.17582e-108
HNF4A	0.759408	7.65658	970.112	3.7159e-107
TMEM179B	0.759336	8.17657	888.873	2.25975e-189
NECTIN2	0.759179	8.05923	760.446	5.12185e-163
MAGEF1	0.75872	7.86109	720.598	8.60784e-155
FAH	0.758458	7.71873	763.226	1.46272e-122
MYO5C	0.758457	7.68363	816.677	1.53151e-106
ST7L	0.758187	7.71052	785.642	3.37357e-122
GMNN	0.757999	8.71797	707.055	5.44125e-152
ZFP36L2	0.757991	9.18757	992.854	1.53448e-210
HDAC10	0.757914	7.68386	860.648	3.66986e-116
FAM96A	0.757853	7.98476	751.693	3.268e-161
MRPL4	0.757745	8.02282	810.893	2.13156e-173
RPL39	0.757433	12.0324	2197.66	0
DERL2	0.75712	7.94859	739.281	1.18955e-158
MRPL51	0.756453	8.86204	1463.08	1.97026e-304
LINC01436	0.756203	7.62682	1058.12	1.60663e-98
PAXX	0.755805	7.97639	789.293	5.87265e-169
PDIA3	0.755731	9.0783	1218.14	6.81489e-256
RHOB	0.755235	10.0389	740.603	6.34746e-159
APOL2	0.755103	7.69335	763.266	5.15455e-118
CDKN3	0.754848	7.65657	729.736	3.41252e-104
LTB	0.754548	7.87752	355.294	2.82499e-78
SLC39A3	0.754416	7.7741	742.381	4.34637e-143
NUDT22	0.754352	7.94576	770.422	4.50477e-165
SCGN	0.754283	7.76183	433.17	9.24122e-95
GRHPR	0.754181	8.17251	858.12	4.40275e-183
COMMD6	0.7541	9.49846	1785.58	0
PMM1	0.753585	7.88964	705.504	1.13972e-151
PEX16	0.753056	7.7586	752.865	5.52707e-148
SMAGP	0.752988	7.81935	717.964	3.01558e-154
PHACTR2	0.752907	7.70474	746.29	2.38609e-121
SELENOO	0.752897	7.65979	959.385	2.77968e-110
RPS7	0.75277	11.3504	2639.49	0
C12orf49	0.752767	7.79845	681.602	1.01655e-146
CSTB	0.75253	8.98583	1314.07	5.36481e-275
MAGI3	0.752415	7.77535	643.973	6.56745e-139
PICK1	0.752252	7.68355	851.487	3.69493e-114
YPEL3	0.752218	8.12414	753.428	1.43343e-161
ATP5PF	0.751871	9.2632	1451.71	3.38227e-302
MISP	0.751504	7.73379	649.347	4.8119e-115
QARS	0.751216	7.76034	731.855	1.92973e-137
RPL38	0.750235	11.0053	1915.75	0
EXTL2	0.750029	7.63656	1130.49	2.24566e-104
NDUFV1	0.749406	8.20013	883.956	2.28365e-188
NOL12	0.748694	7.65786	970.08	1.84561e-108
ITPKC	0.748468	7.6995	754.848	4.30011e-120
ALDOC	0.748338	7.61643	1530.42	1.23833e-107
HDDC2	0.748321	7.89986	741.211	4.75389e-159
ASPSCR1	0.748132	7.73764	747.574	6.98559e-132
SELENOT	0.747723	8.13453	873.723	2.82382e-186
NEDD9	0.746686	8.02377	529.551	4.97254e-115
EIF2B3	0.746141	7.65137	984.121	3.57591e-109
RPL18	0.746108	11.3796	2515.72	0
FTCD	0.746031	7.61585	1570.24	2.14429e-118
ORMDL2	0.745642	8.28332	883.186	3.28098e-188
CYB5D2	0.74534	7.74735	607.45	1.37995e-118
PPP1R14B	0.744607	9.45259	1250.75	2.11131e-262
RNH1	0.744603	8.16082	845.908	1.39608e-180
PRAME	0.744485	7.59483	2971.93	3.27834e-118
PAK1IP1	0.744466	7.78102	677.557	7.00985e-146
PSMD9	0.744109	7.93865	719.979	1.15578e-154
AC007405.3	0.744074	7.64821	973.886	4.59244e-99
JPT1	0.743948	8.23372	718.788	2.0377e-154
GABARAP	0.742871	8.00151	665.182	2.58589e-143
RPL37	0.741822	11.9885	2661.39	0
COMMD2	0.741658	7.91992	723.956	1.74148e-155
COA4	0.739713	8.22928	896.443	6.42318e-191
PTPRF	0.739704	8.50844	761.315	3.38991e-163
PGM2	0.739684	7.68167	827.227	3.56231e-117
PPP6R2	0.739572	7.81717	647.571	1.47262e-133
COA7	0.739398	7.62981	1250.75	7.03121e-117
NDUFS6	0.738391	8.97126	1283.49	6.40016e-269
MOV10	0.73816	7.66545	876.755	1.59685e-105
CYSTM1	0.738104	8.75902	1076.06	2.26743e-227
NAA10	0.737587	7.96324	720.2	1.04044e-154
INHBB	0.737381	7.79446	472.523	4.7014e-103
NOTCH2	0.737332	7.82194	658.69	5.75797e-142
DENND2D	0.736849	7.67186	836.395	2.83791e-104
MFSD13A	0.736473	7.60787	1893.57	1.41326e-112
BLVRB	0.736272	8.59894	1033.32	9.75237e-219
TXNDC9	0.736127	7.9568	748.92	1.2197e-160
COMMD5	0.73604	7.81065	710.916	8.65189e-153
ARHGEF1	0.735082	7.78199	668.75	4.5035e-125
ONECUT2	0.734779	8.16514	524.179	6.64361e-114
MSRB1	0.734193	7.71196	731.078	4.67489e-114
NOP16	0.734163	7.75761	680.035	6.1378e-131
SDHAF1	0.734021	7.71477	738.725	3.63891e-115
MAST4	0.733934	7.74182	555.966	2.72171e-116
SF3B5	0.733789	8.1448	882.196	5.22831e-188
PHACTR3	0.732347	7.62607	1166.66	9.72154e-120
FBL	0.731481	8.05476	761.332	3.36282e-163
NDUFB7	0.731094	9.14024	1584.58	0
PKM	0.730665	9.37175	1183.64	5.42723e-249
GEMIN6	0.730553	7.78659	682.856	5.85566e-143
CMTM8	0.730276	7.73913	703.146	2.31785e-134
SNRNP25	0.730069	7.72865	717.536	5.22778e-123
RANBP1	0.729623	8.29747	905.978	7.26866e-193
2021-03-02	0.728877	7.79535	641.064	2.64233e-138
EMC6	0.728868	8.19539	859.086	2.79167e-183
TMC4	0.728775	8.00965	693.629	3.27414e-149
SCN9A	0.728619	7.66424	703.929	1.39884e-92
ELP5	0.72841	7.78885	598.83	1.74653e-117
ZNF846	0.72746	7.64083	1033.27	3.49658e-102
FBXW11	0.727418	8.03407	690.594	1.39221e-148
MARCKSL1	0.727234	8.55245	748.183	1.73097e-160
TSEN34	0.726901	7.95384	721.32	6.10409e-155
SGK1	0.726644	7.6678	737.306	9.05672e-102
LINC00987	0.725995	7.58882	4917.83	1.01953e-164
TRIAP1	0.725753	7.83759	638.905	7.42921e-138
ESD	0.725258	8.25899	863.546	3.41206e-184
SLC39A7	0.724627	7.88558	594.473	1.32887e-128
CISD3	0.724364	8.14981	812.101	1.20364e-173
YIF1B	0.724338	7.69413	752.099	4.65223e-107
DDRGK1	0.724031	8.29081	858.266	4.10988e-183
NCBP2-AS2	0.723819	7.8824	655.939	2.14517e-141
APEX1	0.723744	8.1898	821.895	1.1739e-175
C18orf32	0.723583	7.9303	674.062	3.71779e-145
ARHGEF26	0.723506	7.60661	1903.67	2.13437e-116
CA11	0.723309	7.6343	1069.66	1.95455e-96
GPR160	0.723292	7.64268	1008.44	2.5004e-108
NDUFAF3	0.72328	8.11398	757.003	2.62454e-162
MRPL48	0.723171	7.72968	702.101	8.20382e-117
NAT9	0.723044	7.72567	679.339	1.95301e-112
PSMA3	0.72286	8.16473	817.097	1.13375e-174
ZNF780A	0.722843	7.65425	927.759	1.6457e-104
ADRA2C	0.722823	7.66336	769.638	4.87396e-88
GPAA1	0.722608	8.22651	779.434	6.27829e-167
SLC25A25	0.722452	7.70295	647.305	2.97066e-124
CTPS1	0.722405	7.74184	667.704	1.09511e-131
EPN3	0.722118	7.60759	1907.27	2.40412e-120
STRIP1	0.72208	7.6306	1155.14	3.56557e-102
PSMC5	0.722039	8.34019	937.221	3.10971e-199
PSMB10	0.72156	7.66971	823.42	6.03837e-109
NDUFA1	0.72155	9.31503	1394.1	7.64585e-291
CHCHD5	0.721064	8.24991	841.705	1.01475e-179
ABHD14A	0.720709	7.6694	851.052	8.2765e-112
LSM2	0.720355	8.07501	728.728	1.7978e-156
LEPROTL1	0.720287	8.12692	751.219	4.09303e-161
FLRT3	0.719631	7.74266	529.191	5.91541e-115
XRCC6	0.719547	8.22012	874.77	1.72434e-186
PSMA7	0.719408	9.18914	1321.02	2.23444e-276
CDKN2B	0.719004	7.63317	1003.76	5.8443e-98
GRHL2	0.718536	7.63939	1006.46	7.98232e-98
FST	0.718313	7.84236	356.613	1.48228e-78
ST8SIA3	0.718127	7.5866	5906.29	1.17795e-185
WDR77	0.718106	7.66341	854.953	7.14211e-103
JOSD2	0.717974	8.11946	782.316	1.60154e-167
SSR1	0.717466	8.25804	704.258	2.06379e-151
PRKAA2	0.717435	7.79144	560.549	1.61385e-121
C1orf56	0.71718	7.83673	570.871	1.12361e-123
C19orf48	0.716892	7.84979	623.916	9.74872e-135
RPS25	0.716109	10.845	2269.09	0
EIF3J	0.715483	8.33688	865.394	1.42834e-184
CHMP4A	0.714907	8.1007	677.055	8.90448e-146
MRPS7	0.714537	8.15026	793.583	7.69913e-170
APIP	0.714401	7.72218	692.493	3.95025e-119
LEPROT	0.714344	8.43885	863.864	2.93644e-184
BOLA2B	0.713799	7.63673	1007.54	1.83226e-93
STXBP2	0.713423	7.85281	643.977	6.55481e-139
THYN1	0.713414	7.82801	655.605	2.5162e-141
ZNF667-AS1	0.713072	7.5941	2911.72	1.71746e-139
UNC93B1	0.712675	7.76701	624.655	4.73396e-119
DCTPP1	0.712563	8.07711	746.546	3.76769e-160
TMEM126B	0.712197	7.94363	686.093	1.19185e-147
MRPL58	0.712181	7.85429	662.754	8.25264e-143
MRPL20	0.712119	8.34354	903.051	2.87555e-192
MBNL2	0.712042	8.00062	570.114	1.6169e-123
GCSH	0.711987	7.99582	696.641	7.78511e-150
TRMT10C	0.711933	7.88241	644.771	4.48241e-139
INAVA	0.711598	7.87631	563.463	3.96887e-122
MECOM	0.711201	7.60407	1959.82	4.66352e-114
RIOX2	0.710823	7.66249	827.764	1.78395e-101
PPIH	0.710674	7.78998	621.428	2.5249e-127
CASP4	0.710243	8.02605	603.992	1.37687e-130
TRPT1	0.709473	7.77062	643.545	1.71893e-121
IFI27L1	0.709218	7.65256	883.954	3.75255e-98
PCDHA12	0.708889	7.59194	3580.62	1.48549e-144
TRIR	0.708831	8.95191	1417.62	1.75316e-295
LMF2	0.708256	7.77114	621.594	1.66363e-117
CCDC124	0.708165	7.92401	677.193	8.33893e-146
SNRNP40	0.708122	7.76478	643.7	1.01837e-118
NACA	0.707294	11.0834	2175.91	0
ARNTL2	0.70709	7.65685	805.565	4.99688e-92
PTGR1	0.707022	7.74803	564.744	2.14312e-122
MESD	0.706966	8.1926	789.74	4.75287e-169
RUVBL2	0.706847	7.78588	644.567	5.46049e-138
DNAJC3	0.70668	8.08428	644.399	5.35537e-139
TBC1D16	0.706411	7.65986	797.91	3.55796e-99
SIAH2	0.705945	7.74344	633.735	1.55658e-115
DGAT1	0.705029	7.74359	645.181	1.29763e-116
SDF2	0.705014	8.11813	795.54	3.04903e-170
RPL29	0.704637	10.8328	1757.59	0
ERLEC1	0.704429	8.12195	721.715	5.05825e-155
ARRDC2	0.704262	8.06586	567.414	5.9269e-123
COL4A1	0.704121	7.63315	1023.49	5.82793e-103
G0S2	0.704077	7.72659	424.872	5.22055e-93
BCL2L12	0.703864	7.69208	725.272	1.46781e-105
CHCHD10	0.703806	9.42761	1090.85	2.36593e-230
NCLN	0.702932	7.69859	706.292	2.21496e-105
TEX9	0.702727	7.71068	650.034	7.87875e-106
LRRC28	0.702279	7.66016	823.284	1.42215e-95
PDHB	0.702261	7.82156	632.195	1.84661e-136
RND1	0.702155	7.65977	738.395	2.68791e-98
POLDIP2	0.701975	7.85768	649.845	3.95527e-140
MIER1	0.701755	8.00452	607.442	2.62936e-131
MPDU1	0.700945	7.69944	704.621	4.4383e-106
PARK7	0.700819	8.6455	1062.67	1.13971e-224
SELENOH	0.700687	8.71132	1138.67	5.65412e-240
C9orf16	0.700338	8.3605	813.254	6.97858e-174
ABHD3	0.700103	7.93254	610.458	6.18652e-132
TPRN	0.700097	7.74755	577.285	2.08275e-119
ANP32A	0.699842	8.37805	891.921	5.38674e-190
MISP3	0.699606	7.70855	638.136	3.34106e-101
LIMA1	0.698676	7.66793	759.785	9.40707e-103
CYBC1	0.698187	7.79733	615.33	2.41818e-131
ZNF57	0.697737	7.60944	1649.89	8.05874e-111
MRPS24	0.697675	7.60707	1681.14	3.57873e-111
TXLNA	0.697658	7.77104	586.239	6.20994e-116
PKP2	0.697481	7.62328	1223.01	1.09659e-102
COX7B	0.69736	9.55218	990.439	4.74063e-210
PLEKHJ1	0.69713	8.09914	711.589	6.27841e-153
NMI	0.697033	7.86038	610.113	7.30048e-132
RPS15	0.696999	11.6933	2368.66	0
ATF7IP2	0.696936	7.59625	2609.18	8.51409e-119
POMP	0.696882	8.74124	1086.54	1.7496e-229
RPS6KB2	0.69687	7.75491	630.404	2.13768e-116
INHBE	0.696861	7.59297	2815.87	2.38634e-124
MORF4L1	0.696384	8.97676	1314.19	5.08014e-275
STX18	0.695851	7.85868	610.124	7.259e-132
TRAPPC1	0.695782	8.25176	772.963	1.34979e-165
AL138930.1	0.695312	7.58471	6849.81	9.72966e-194
SPAG16	0.695135	8.00278	628.217	1.24116e-135
HACD2	0.69505	7.89248	555.764	1.61694e-120
TRMT1	0.694742	7.69223	708.82	1.33278e-102
STOML2	0.694718	8.15598	768.868	9.41502e-165
ZDHHC23	0.694565	7.70395	617.085	3.27359e-104
PIGH	0.694251	7.69967	685.395	1.94071e-106
UBE2L3	0.694214	8.19229	783.134	1.08717e-167
CDK5RAP3	0.694124	7.88693	627.136	2.08306e-135
EBP	0.694039	7.9432	579.17	2.07526e-125
UBA52	0.693757	10.4948	2276.95	0
MRPS18C	0.69353	8.0171	649.552	4.5499e-140
FAM229B	0.693477	7.67416	747.917	2.90876e-100
ACAA1	0.693374	7.93419	610.009	7.67189e-132
C3orf52	0.693189	7.63808	954.466	1.92709e-92
ACOT13	0.69304	7.88004	579.436	1.82625e-125
MRPL47	0.692726	8.09602	727.232	3.66331e-156
SSX2IP	0.692564	7.68733	699.821	6.18696e-103
RARRES1	0.692108	7.61777	1072.84	3.33713e-100
PLOD1	0.691833	7.64066	855.171	3.69525e-82
AL133453.1	0.691654	7.80391	472.487	4.78477e-103
PPAN	0.691636	7.68835	702.679	3.55023e-101
C17orf58	0.691579	7.65096	873.059	2.18414e-97
TBC1D30	0.691539	7.60606	1767.3	2.64629e-108
NDUFS2	0.691264	8.65908	936.527	4.30572e-199
PSMG2	0.69113	8.1848	780.467	3.84656e-167
CD3D	0.690571	7.64172	802.58	1.722e-95
HENMT1	0.690132	7.593	3107.26	6.35964e-130
MFSD10	0.689888	8.39909	805.923	2.23723e-172
RFXANK	0.689477	7.81741	630.177	4.85326e-136
ULK3	0.689277	7.66701	746.945	1.3326e-88
UBE2M	0.688489	8.21899	793.093	9.71363e-170
YDJC	0.688426	7.80494	609.273	1.09194e-131
NTAN1	0.688385	7.81575	597.006	3.9382e-129
ROMO1	0.688134	8.97332	1119.68	3.70656e-236
FAM110A	0.687854	7.63828	952.858	9.39035e-93
IL17RB	0.687675	7.6514	798.995	1.2493e-95
NIPSNAP1	0.687513	7.81242	577.946	3.73922e-125
PSMD2	0.687406	8.07319	635.072	4.65439e-137
C22orf39	0.686837	7.79496	596.453	8.5688e-128
RSBN1	0.686673	7.81969	584.264	1.79346e-126
B3GNT3	0.686072	7.72593	602.013	1.53332e-99
POP5	0.686028	7.88153	600.428	7.61504e-130
KRT6B	0.686022	7.64749	524.102	3.26423e-75
ABCA5	0.686016	7.66152	744.268	9.07329e-89
C6orf132	0.685909	7.73236	586.592	7.3469e-107
PPP1R1B	0.685891	7.58975	3545.84	5.53925e-128
ALG14	0.685252	7.7281	624.52	8.17235e-105
LGALS3BP	0.685199	8.8419	835.233	2.15345e-178
TK1	0.684878	7.61965	1007.83	1.01288e-98
BCR	0.684632	7.6598	776.303	3.35093e-89
NOP53	0.684415	9.06976	1049.84	4.45246e-222
SIRT7	0.684293	7.79367	597.447	3.0809e-125
TUSC2	0.684292	7.84863	612.182	2.70583e-132
ZFAND6	0.684214	8.16544	740.355	7.13951e-159
MGST3	0.684047	9.80318	1326.8	1.5968e-277
SIGMAR1	0.683216	7.66615	738.857	5.12017e-91
PPCDC	0.682741	7.67993	693.294	7.06832e-90
MRPL16	0.682054	7.81973	605.673	6.14424e-131
SF3B6	0.681503	8.83508	1214.42	3.77073e-255
ACO2	0.680609	7.9432	586.988	4.84394e-127
AFAP1-AS1	0.680399	7.6082	1464.78	1.21882e-90
ECSIT	0.680305	7.80882	593.88	1.76683e-128
MCEE	0.680074	7.74604	584.647	4.71013e-105
ZMAT5	0.679698	7.7809	605.318	4.54665e-122
TRIB2	0.679578	7.62098	1136.25	2.12765e-89
RASSF5	0.679178	7.6014	1985.07	3.79157e-110
SELENOK	0.679018	8.30181	694	2.74329e-149
AP005329.3	0.678993	7.62612	1066.98	4.9227e-93
SKA2	0.678822	7.83914	568.42	3.65374e-123
TKT	0.678791	8.04834	598.027	2.41142e-129
ORAI1	0.678414	7.68137	698.016	1.22003e-99
SUSD6	0.678083	7.72684	568.198	1.29173e-92
HARS	0.678071	7.73867	605.417	1.37247e-103
MANEAL	0.677613	7.65358	797.112	1.38927e-94
PHB	0.677611	8.57505	964.824	7.53837e-205
NDRG2	0.677573	7.82024	541.649	1.45361e-117
DNASE2	0.677557	7.88296	581.627	6.37101e-126
EVPL	0.677548	7.60408	1640.16	2.54017e-89
RRP7A	0.677535	7.78421	590.892	6.65672e-121
HGD	0.677463	7.89004	542.543	9.44677e-118
DPH2	0.677215	7.63313	986.439	4.85813e-92
BAK1	0.677168	7.68032	693.947	6.0346e-94
APOC2	0.6771	7.58668	4535.84	3.71331e-142
PIP4P2	0.67703	7.7984	573.28	7.52872e-120
PTGES2	0.676773	7.79166	559.242	3.02895e-121
COA6	0.676634	8.12163	675.414	1.94975e-145
RNFT1	0.676599	7.65005	813.006	2.83927e-88
BAX	0.675636	8.64031	681.373	1.13372e-146
BPHL	0.675599	7.74421	583.35	6.09059e-104
ST13	0.674327	8.80955	1017.85	1.31516e-215
NT5C3B	0.674322	7.79773	571.789	7.22533e-124
MRPL2	0.673541	7.84278	563.022	4.90819e-122
IGSF9	0.673368	7.60753	1497.52	6.17575e-92
ATP13A3	0.673314	8.19894	505.69	5.02622e-110
H2AFJ	0.67232	8.53461	588.67	2.15861e-127
GTPBP8	0.672052	7.65857	768.373	7.68265e-93
RMND5B	0.67173	7.76518	587.252	6.78199e-109
TLCD1	0.671621	7.65378	802.968	1.45279e-94
CTSA	0.67091	8.11913	633.803	8.54593e-137
THEM6	0.670693	7.80144	552.175	9.10594e-120
TRNAU1AP	0.670591	7.71613	605.83	3.06691e-97
MRPL3	0.670534	8.0724	657.234	1.15465e-141
PNKD	0.670416	8.16605	692.92	4.59201e-149
PEBP1	0.670391	9.68532	882.694	4.13702e-188
NKG7	0.670187	7.65925	572.557	1.47954e-95
SFXN4	0.669951	7.76299	588.842	5.31228e-124
CLIC3	0.669934	7.7157	454.424	1.64638e-76
PDK2	0.669731	7.66215	736.49	7.46287e-90
RRS1	0.66963	7.69771	632.517	2.41231e-100
PRELID1	0.669619	8.79437	962.223	2.54636e-204
MRPS5	0.669608	8.13047	674.601	2.87518e-145
PLEKHF2	0.669241	7.80447	536.426	1.80332e-116
DEPTOR	0.668483	7.65301	741.506	3.20519e-86
SPCS2	0.668296	9.08179	1304.7	3.89178e-273
MZT2A	0.667545	9.01497	1206.61	1.37574e-253
TOLLIP	0.667138	7.78724	581.323	7.44416e-124
MINDY1	0.66707	7.64732	808.825	2.34049e-85
GPATCH4	0.666972	7.96843	566.764	8.10605e-123
NUDT16	0.66689	7.7626	576.593	9.99812e-111
MRPL43	0.666838	8.24553	789.671	4.91105e-169
EAPP	0.666783	8.06348	613.847	1.21757e-132
DNAJC17	0.666666	7.72306	593.122	3.25003e-95
RNASET2	0.666536	7.89189	568.688	3.21197e-123
ASCC2	0.665852	7.69951	623.747	3.31329e-91
TSC22D3	0.665211	8.0258	380.078	1.56303e-83
TPGS2	0.664971	7.94542	577.576	4.46668e-125
APOPT1	0.664938	8.0141	600.407	7.69473e-130
PRLR	0.664757	7.63887	735.305	2.33915e-71
MCOLN1	0.664614	7.69493	633.918	1.80426e-93
RFNG	0.664584	7.80156	559.903	9.98785e-114
RNF7	0.664505	8.59057	928.54	1.8232e-197
CORO1A	0.664389	7.61835	1123.49	1.52247e-97
PSMC6	0.664385	8.06599	623.152	1.40598e-134
SLCO2A1	0.664169	7.60475	1399.05	3.57884e-81
MT1M	0.664073	7.69948	411.418	3.63484e-90
HIGD2A	0.663862	8.71945	938.777	1.49903e-199
ATP5S	0.663704	7.697	621.651	5.48446e-95
ICAM3	0.663492	7.75211	561.112	3.63152e-103
GYG1	0.663312	7.67736	685.197	2.30563e-93
NRARP	0.663059	7.68015	589.007	1.64641e-91
KPNA6	0.662865	7.8332	501.699	3.46072e-109
GALK1	0.662834	7.77841	564.777	9.29794e-120
CNPY3	0.662807	7.79469	552.13	8.62962e-116
SRSF8	0.662735	7.84081	546.929	1.14046e-118
C9orf152	0.662567	7.58612	4806.04	1.30147e-145
SYVN1	0.661974	7.72218	556.31	5.3093e-87
HMGA1	0.661155	8.09538	500.732	5.52296e-109
RPN1	0.661107	8.17017	581.816	5.81706e-126
INTS13	0.660914	7.66414	713.47	1.85508e-89
GMPPA	0.660751	7.80807	515.058	2.23e-101
UBALD2	0.660429	8.70831	734.83	9.87219e-158
EMC7	0.660242	8.26833	774.71	5.89384e-166
COL16A1	0.659817	7.66178	589.469	2.89546e-65
UROD	0.659303	7.77733	544.67	2.64773e-112
C15orf39	0.659063	7.64741	747.005	1.10317e-76
CALM2	0.658981	10.4	1536.62	7.4592054946528e-319
COPRS	0.658962	8.09813	645.982	2.51067e-139
SPCS1	0.658887	8.74493	1006.02	3.28919e-213
WWC1	0.658707	8.03674	456.231	1.26715e-99
PRPF31	0.658608	7.89242	586.812	5.27024e-127
SDC3	0.65845	7.72443	472.508	6.81647e-72
PRPSAP1	0.658404	7.84246	545.344	2.44878e-118
ALDH7A1	0.657854	7.75523	563.823	9.60196e-114
RRBP1	0.657733	8.50447	724.841	1.14282e-155
AL121899.1	0.657613	7.61494	1247.72	1.12243e-94
RNF13	0.657228	8.06091	599.959	9.54164e-130
TMEM123	0.657036	8.43559	750.098	6.97011e-161
SCCPDH	0.656051	7.99517	544.609	3.48856e-118
CCL5	0.655885	7.72735	389.004	2.00864e-85
CXXC5	0.655641	8.44722	683.951	3.31282e-147
EPHB6	0.655151	7.77303	436.176	2.14478e-95
ZSWIM7	0.654898	7.83243	543.055	7.37872e-118
TXNDC12	0.654761	7.99301	563.646	3.63461e-122
PLGRKT	0.6546	7.77232	543.277	9.16824e-108
PLEKHA5	0.654039	7.94874	538.386	7.00915e-117
RHOU	0.653118	8.10564	484.986	1.12393e-105
NDFIP2	0.652944	7.86208	547.281	9.62456e-119
MPC1	0.652574	8.01844	491.557	4.67305e-107
MRPL14	0.652251	8.19373	615.327	5.98638e-133
FAM173A	0.652008	8.16527	630.136	4.94994e-136
SLC28A3	0.652007	7.61093	1317.37	1.63396e-96
WDR74	0.651966	7.81847	533.895	6.11398e-116
ANXA2	0.651064	10.7307	1005.62	3.95316e-213
CCDC88B	0.650971	7.74644	535.52	7.89219e-95
VAT1L	0.650751	7.60152	1736.05	3.95527e-103
FKBP10	0.650733	7.76152	461.398	1.76562e-83
TMEM251	0.650422	7.733	559.754	2.06393e-97
NEK10	0.649999	7.59323	2387.14	5.75138e-100
TRMT11	0.649888	7.70958	561.466	3.33318e-98
PTOV1	0.649826	7.87531	547.339	9.35887e-119
WDR3	0.649633	7.70142	592.065	4.70698e-93
SLC25A19	0.649246	7.62026	1086.56	3.09562e-93
ONECUT3	0.649128	7.58592	4538.48	9.17314e-140
FAM83H	0.648033	7.76652	518.288	8.90796e-99
KCTD17	0.647828	7.64815	742.235	1.58303e-77
LINC00862	0.647605	7.61102	1112.89	4.29743e-73
TUT4	0.647325	8.0677	490.308	8.55113e-107
IL15RA	0.647173	7.67402	630.061	2.34756e-85
GGT5	0.647139	7.60495	1248.25	1.96077e-75
LACTB	0.647137	7.79737	486.794	4.68409e-106
MT1G	0.646991	7.87758	241.846	4.44957e-54
CADM1	0.646956	7.93699	430.243	3.83393e-94
ACOT2	0.64677	7.64074	770.151	4.47819e-75
NDUFB6	0.646657	8.12481	591.845	4.69653e-128
UBE2E3	0.646447	8.3084	690.634	1.3661e-148
GPT	0.646426	7.60548	1505.34	1.41286e-92
SCAMP2	0.646362	7.88223	530.854	2.65094e-115
ACOT4	0.646313	7.59469	2353.7	1.22689e-105
GFPT1	0.64603	7.90152	474.805	1.55634e-103
TMEM175	0.645711	7.64564	760.765	2.76602e-80
APOL6	0.645162	7.7821	450.258	2.2989e-98
RABGGTB	0.645079	8.00532	507.737	1.86855e-110
TNFRSF11B	0.645042	7.82143	309.198	1.80253e-68
TAF11	0.644541	7.84862	499.372	1.06612e-108
RPL26	0.644492	11.4723	1643.95	0
EIF2B5	0.644345	7.7344	541.96	1.8382e-96
FKBP3	0.644007	8.08219	563.329	4.23402e-122
PFN1	0.643962	9.7742	951.845	3.28337e-202
TMEM126A	0.643903	7.90566	557.692	6.38915e-121
TTPA	0.64375	7.61388	1193.08	5.3917e-98
ANAPC13	0.64372	7.91497	537.454	1.09878e-116
OSBPL1A	0.64367	7.79708	437.578	1.08532e-95
ADRM1	0.643118	8.17323	642.435	1.37077e-138
CYP2C9	0.642815	7.64891	599.023	3.56367e-85
PDGFB	0.642772	7.68215	511.652	1.90428e-71
UBE2C	0.642681	7.61719	807.919	4.06102e-81
TTC22	0.642614	7.63276	856.808	3.43168e-80
TOMM70	0.642459	7.77811	500.728	3.10855e-105
GRWD1	0.642374	7.69528	597.992	4.40785e-88
TMEM53	0.642317	7.63082	902.897	1.81732e-83
ATP5IF1	0.642303	8.56784	751.177	4.1737e-161
TTC1	0.642258	8.06197	568.488	3.53582e-123
AQP5	0.642095	7.59351	2126.34	3.40702e-94
RIN2	0.642029	7.63007	866.141	1.86723e-76
NOTCH3	0.641583	7.68408	534.141	3.78336e-75
WDR46	0.640828	7.79119	523.6	1.17009e-107
PSME1	0.640823	8.42017	727.093	3.91424e-156
KIF22	0.640756	7.8164	473.967	2.33541e-103
PSMB1	0.64063	8.48308	813.885	5.17872e-174
MRPS9	0.639653	7.80775	533.998	5.81674e-116
ATP5PO	0.639621	8.80773	848.728	3.69138e-181
MRPS22	0.639605	7.79399	534.614	4.32166e-116
PGLS	0.638776	8.42654	730.691	7.06937e-157
SIVA1	0.638492	8.25471	655.203	3.04909e-141
GIPC2	0.638445	7.64595	714.342	3.57894e-88
ZPR1	0.638436	7.7425	537.198	5.91176e-97
PSMD14	0.63843	8.09521	556.57	1.09663e-120
PSMD13	0.637571	8.01152	576.429	7.75544e-125
SNF8	0.637485	8.37029	748.774	1.30702e-160
SEC61A1	0.637451	8.05686	514.677	6.53522e-112
ZDHHC24	0.637139	7.77988	520.039	1.71949e-108
TAP2	0.637045	7.68136	583.684	2.10147e-87
PLK3	0.636984	7.75656	495.638	1.07866e-104
TMCO1	0.636516	9.25081	1221.76	1.28675e-256
IFRD2	0.636496	7.72849	547.918	9.98531e-99
SNCG	0.636122	7.61291	985.214	6.10122e-78
ACSS1	0.635771	7.68348	551.524	8.28553e-79
OTC	0.635675	7.58237	4762.11	2.7398e-188
AC019197.1	0.635627	7.58523	4805.49	7.28464e-144
RALYL	0.635486	7.61322	1131.98	1.4378e-90
CYP4A11	0.635159	7.59629	1783.61	9.22114e-87
AKR1B1	0.635014	7.66545	617.159	2.43833e-87
ILF2	0.634813	8.45493	711.435	6.75486e-153
KLRB1	0.634811	7.61396	962.389	8.44569e-80
AMDHD1	0.634763	7.59183	2691	8.48255e-111
CD59	0.634307	8.91106	687.744	5.42164e-148
SOD1	0.633772	9.01809	911.456	5.54221e-194
CCL4L2	0.63345	7.68491	468.016	5.18456e-91
TXNRD2	0.633326	7.67388	625.612	2.16322e-83
SLC41A3	0.633284	7.71722	545.28	1.85315e-93
MZT1	0.633077	7.77037	480.918	3.54721e-95
ADI1	0.633031	8.22216	571.789	7.22506e-124
GEMIN7	0.632839	7.66241	683.888	3.56221e-86
CPEB4	0.632389	8.05387	439.447	4.37748e-96
TRIB3	0.632238	7.8054	428.026	1.12628e-93
SPG21	0.631988	7.8912	517.573	1.61328e-112
GCDH	0.6315	7.63605	833.464	6.03456e-82
GNL3	0.631419	7.86096	500.926	5.02792e-109
GFER	0.63131	7.75079	521.943	4.74185e-96
FAM177A1	0.63125	8.3398	622.892	1.59246e-134
EIF2B2	0.630981	7.77778	506.43	1.37094e-99
ACTL6A	0.630928	7.84435	512.364	1.99698e-111
CENPX	0.630925	8.14371	568.92	2.87238e-123
AP3S1	0.630762	7.9174	523.928	7.50139e-114
RRP36	0.630709	7.83282	511.045	3.77835e-111
SH2D3A	0.630589	7.81656	460.637	1.49472e-100
FKBP8	0.630571	8.30387	705.607	1.08506e-151
SRM	0.629889	7.82663	495.23	7.90272e-108
GAS2L1	0.629843	7.74314	509.538	1.05142e-96
ARHGAP45	0.629334	7.61726	1047.54	8.3735e-80
CSF1	0.629153	7.66987	522.341	4.18276e-83
SEC62	0.629087	8.97742	1077.3	1.27282e-227
LACTB2	0.629027	7.90517	459.156	3.0665e-100
COPG1	0.628974	7.86132	481.215	6.97653e-105
RWDD1	0.62867	8.08069	553.342	5.19177e-120
RPP25L	0.62854	7.75699	503.593	1.00403e-93
LAPTM5	0.628181	7.63015	811.733	7.44784e-82
RDH5	0.628041	7.63458	796.969	1.29649e-80
SEMA3D	0.62804	7.58714	3153.62	4.71453e-101
SERTAD2	0.627948	7.68658	542.116	3.27239e-77
FRMD6	0.627648	7.69876	439.913	3.62258e-73
YARS	0.626905	7.7081	501.195	6.26955e-86
APTR	0.626904	7.72778	498.508	1.58413e-82
SNTB1	0.626791	7.64089	745.468	1.71156e-77
PTP4A2	0.62638	8.31846	619.775	7.09327e-134
ANAPC11	0.625905	8.61205	743.058	1.9756e-159
RXYLT1	0.625872	7.76658	478.332	2.82011e-91
PRADC1	0.625828	7.68413	575.285	4.62884e-83
CELF5	0.625723	7.59053	2636.02	6.20475e-102
RPL19	0.62555	11.7341	1927.82	0
STMN3	0.625314	7.65366	656.784	5.38661e-78
DRG1	0.625241	7.75217	512.711	3.17491e-97
EPCAM	0.625236	9.94982	1198.13	6.81987e-252
CCT8	0.625188	8.36858	706.073	8.68874e-152
MRPL19	0.625054	7.96783	546.707	1.26954e-118
SNX10	0.625053	8.17841	408.014	1.90634e-89
LEFTY1	0.624987	7.61348	842.731	1.93888e-71
INTS11	0.624519	7.73778	518.257	2.26761e-90
SNRPA	0.624344	7.81236	457.476	2.43364e-96
TRMT44	0.624231	7.63942	779.274	2.1341e-82
SRSF11	0.624227	8.51933	704.35	1.97477e-151
GRPEL1	0.624086	7.88884	501.561	3.69853e-109
UGT8	0.623874	7.59577	1916.55	3.65583e-93
GTF3C6	0.623561	8.35185	612.441	2.38939e-132
GMPR2	0.623077	7.79543	498.889	1.34634e-108
TM2D3	0.623073	7.80892	466.491	1.57895e-94
EIF2AK4	0.622832	7.85818	487.658	3.08349e-106
CTSD	0.622458	8.97642	707.564	4.27129e-152
DERL3	0.622349	7.59142	2375.81	4.03007e-95
CCDC51	0.62229	7.66301	635.967	9.64731e-86
CD63	0.621797	10.8261	1543.09	4.04096291733556e-320
DGKE	0.621606	7.62427	892.74	9.88559e-78
BCAT2	0.621513	7.67579	593.124	7.73866e-80
FTL	0.621378	11.2333	849.181	2.98043e-181
PCCB	0.620974	7.67634	578.949	6.00599e-77
GSDMD	0.62065	8.16005	579.374	1.8817e-125
RCAN1	0.62044	7.64734	662.472	1.00505e-82
LAPTM4A	0.620359	9.20856	1033.54	8.78541e-219
ZNF771	0.620253	7.63792	761.009	1.37909e-77
PDCD2L	0.620096	7.62274	956.754	4.27748e-80
LINC01426	0.619831	7.59825	1612.01	5.16629e-77
TYW3	0.619616	7.77064	461.154	2.87206e-99
NDUFB8	0.619466	8.74171	896.683	5.73833e-191
HSPA6	0.618889	7.89566	233.676	2.51069e-52
PCCA	0.618658	7.72912	495.174	9.7263e-86
GUCY1A1	0.618349	7.62088	947.378	3.1586e-81
TKFC	0.618049	7.72638	496.847	1.33314e-80
AC015912.3	0.617917	7.65546	551.993	7.2634e-68
ATP6V1D	0.617646	8.0579	527.295	1.47699e-114
THOC3	0.617625	7.73645	475.367	5.41392e-82
IFITM2	0.6176	8.83106	498.639	1.51949e-108
TUBB	0.617534	8.72619	533.712	6.67873e-116
MAGOH	0.617456	8.15826	592.39	3.61488e-128
SUSD3	0.617354	7.58876	3111.93	1.01999e-125
AGL	0.617339	7.67648	552.787	1.94077e-74
CYHR1	0.617272	8.06838	549.037	4.13078e-119
MRPL22	0.617219	8.14183	605.204	7.69281e-131
CHURC1	0.61654	8.33687	665.469	2.25444e-143
METTL23	0.61653	8.02309	538.196	7.68351e-117
PWWP2B	0.616444	7.71113	526.056	1.97099e-85
LIMK2	0.61628	7.64814	663.183	6.05111e-71
NOL7	0.616265	8.32974	663.692	5.27146e-143
SNIP1	0.61612	7.75349	469.36	5.08261e-92
B4GALT7	0.615799	7.72156	502.759	1.06237e-78
GTF2A2	0.61539	8.42603	752.757	1.97164e-161
MPC2	0.614471	9.49116	788.395	8.98804e-169
LETM1	0.614238	7.69789	531.826	9.04611e-82
RAB38	0.614182	7.63652	734.924	3.1678e-69
AC004264.1	0.614116	7.63275	585.189	3.7641e-60
LLPH	0.613833	7.98566	515.402	4.60277e-112
JTB	0.613631	9.01044	957.847	1.97545e-203
ZNF219	0.613525	7.68536	539.949	3.23065e-78
MRPL53	0.613038	7.69967	511.772	1.62358e-74
UBAC2	0.612982	7.78587	470.998	1.10191e-96
EIF3F	0.61295	8.60187	717.071	4.6146e-154
BYSL	0.61275	7.64003	735.276	8.16102e-78
SUN2	0.61267	7.76695	432.937	4.96607e-80
COMMD3	0.612054	7.97167	518.971	8.21307e-113
TMED1	0.612049	7.82554	481.197	7.03956e-105
MMP24OS	0.611973	8.16779	524.45	5.83153e-114
MTX1	0.6112	8.09544	564.471	2.4439e-122
TMEM256	0.611161	8.11211	508.147	1.53297e-110
TRAPPC6A	0.611066	8.06075	537.752	9.51786e-117
ABHD13	0.610267	7.67232	573.989	7.53757e-73
HYAL2	0.610192	7.68257	557.579	4.43937e-77
PPM1N	0.60982	7.59902	1688.97	7.4576e-91
PYCR3	0.609765	7.63823	752.843	1.05387e-77
NDUFB10	0.609702	8.64378	845.664	1.56672e-180
PAPSS1	0.609683	7.75569	435.591	3.96888e-80
FCGR3B	0.60947	7.59064	2176.42	3.20747e-100
FSIP2	0.609409	7.60816	1105.51	1.73604e-80
HIP1R	0.609232	7.77391	441.964	1.6088e-94
UGDH	0.609103	7.85622	413.507	1.31494e-90
TRBC2	0.608403	7.65441	501.926	1.26597e-69
ZNHIT1	0.608321	8.82191	875.047	1.51371e-186
C2orf40	0.608158	7.58701	3254.11	4.18828e-120
IRF7	0.608126	7.80444	410.881	4.72228e-90
C12orf10	0.608033	8.08971	541.597	1.49049e-117
NFXL1	0.607977	7.67538	555.84	2.27668e-76
ANXA6	0.607936	7.61071	1120.62	5.81463e-81
CKMT1A	0.607904	7.59182	2517.3	5.8119e-113
TMEM177	0.607873	7.65777	625.382	3.41425e-75
FKBP4	0.607853	8.24019	556.82	9.71932e-121
TMEM191C	0.607592	7.65089	623.197	4.55997e-67
TIMM44	0.607178	7.78351	448.324	4.14531e-94
ALYREF	0.607089	7.90781	468.886	2.73939e-102
2021-03-03	0.606995	7.62253	834.098	8.71353e-75
OCEL1	0.606995	7.72378	497.324	4.15958e-87
MECR	0.606942	7.66608	582.944	6.93569e-71
SESN1	0.606918	7.65213	623.208	5.32006e-71
MTAP	0.606823	7.73853	479.332	1.30427e-88
DVL1	0.606759	7.64729	639.578	1.72506e-65
RPL15	0.606714	11.0859	1220.97	1.84989e-256
SDC1	0.606714	8.15888	458.332	4.57296e-100
BPGM	0.606543	7.81703	422.864	1.38595e-92
NDUFA9	0.606272	8.06249	536.423	1.80634e-116
DSC2	0.606076	7.85267	390.965	7.72069e-86
AES	0.606053	8.5948	755.905	4.42191e-162
SMIM13	0.605829	7.65575	616.264	5.14153e-72
AVEN	0.605623	7.64155	712.65	6.82738e-75
DECR1	0.605544	8.28812	557.108	8.46075e-121
DDOST	0.605478	8.10414	552.733	6.96113e-120
LGALS2	0.60524	7.70717	312.295	3.94327e-69
EEF1G	0.60499	7.70659	485.335	1.53953e-75
NPRL2	0.604733	7.63258	794.43	1.9789e-75
C11orf98	0.60458	7.6016	1465.23	4.94013e-82
CFL1	0.604316	9.7011	988.155	1.37813e-209
DMRTA1	0.603576	7.61882	949.229	6.80699e-77
ACOT8	0.603494	7.67953	556.252	9.84825e-77
GON7	0.603225	7.70923	505.779	1.4509e-81
APEH	0.603142	7.69916	513.469	2.284e-77
LINGO1	0.603104	7.63948	556.574	7.19854e-51
ALKBH6	0.602886	7.63173	769.33	5.30741e-69
SLC1A7	0.602744	7.62468	745.97	7.85097e-75
RPL22	0.602352	10.247	1726.42	0
CYP2J2	0.602222	7.60976	1113.82	4.99428e-80
CA13	0.602029	7.59411	2101.6	4.89442e-97
MKNK1	0.602013	7.65689	609.763	5.65256e-75
KLHL23	0.601891	7.65133	584.311	1.85648e-68
ZFPL1	0.601624	7.76563	456.578	3.55633e-85
POLR2E	0.601453	7.97754	506.966	2.71255e-110
POLE4	0.601296	7.88714	449.782	2.8974e-98
RPLP2	0.601089	10.883	1425.05	6.01858e-297
SCAND1	0.601065	8.47801	743.403	1.6775e-159
TNFAIP8L1	0.601064	7.62295	857.601	4.62146e-73
DHPS	0.600796	7.97073	482.515	3.71832e-105
BABAM1	0.600451	7.87413	478.277	2.89461e-104
PTK6	0.600374	7.6131	1014.54	5.90197e-71
RPS13	0.599094	11.0614	1304.35	4.56642e-273
BRK1	0.598889	8.37337	628.586	1.03992e-135
KRTCAP3	0.59861	8.46491	608.255	1.77967e-131
IGF2.1	0.598598	7.63152	658.952	1.23852e-59
MBOAT7	0.598509	7.82823	444.839	3.19256e-97
EIF2S2	0.598494	8.66216	755.424	5.55535e-162
SLC39A13	0.59812	7.68523	519.564	8.10344e-75
P4HTM	0.597214	7.92145	461.495	9.8627e-101
COL4A2	0.597202	7.7285	430.689	9.63481e-89
CCDC32	0.597148	7.73606	471.926	1.81356e-80
SNRPF	0.596962	8.57684	723.853	1.82835e-155
AL121820.2	0.5969	7.58914	2657.96	4.16455e-100
KRT17	0.596867	8.04865	171.65	5.49563e-39
UBA5	0.596543	7.77686	442.618	1.5643e-91
HEXDC	0.595954	7.74005	449.445	1.20717e-84
APOL1	0.595927	7.66143	517.404	4.76121e-71
RGS9	0.595411	7.62086	843.122	3.1061e-71
CCDC106	0.595312	7.61012	1160.02	1.08896e-84
IGHG3	0.595093	7.60917	832.301	2.10392e-58
SEC61B	0.594528	9.00579	878.206	3.41994e-187
SPNS2	0.594404	7.73346	379.055	6.05862e-67
LRRC8B	0.594222	7.66269	548.705	1.60662e-67
UQCRC1	0.59378	8.00659	476.308	7.5128e-104
CKMT1B	0.593738	7.58858	3011.6	1.05685e-117
CLPTM1L	0.593501	7.992	471.111	9.32121e-103
CGRRF1	0.593027	7.68956	510.769	2.26836e-75
PDLIM7	0.592155	7.97497	375.059	1.80991e-82
ALOX5AP	0.591898	7.62152	802.217	1.35053e-74
SNRNP70	0.591716	8.2065	545.891	1.88104e-118
IL1RN	0.591434	7.59441	1855.75	7.79958e-91
AL050341.2	0.590942	7.64043	673.657	4.1814e-69
FCHSD1	0.590867	7.60363	1286.58	3.52548e-73
NPM1	0.590834	10.1676	1048.51	8.27007e-222
SPPL2A	0.590757	8.00165	477.346	4.54361e-104
CYBA	0.590594	9.8182	944.268	1.14301e-200
DCPS	0.59058	7.68433	510.489	1.07636e-74
BANF1	0.590451	8.54873	729.323	1.35518e-156
WDR45B	0.590294	8.01765	434.302	5.33356e-95
BCL2L10	0.589521	7.60652	1150.86	3.88554e-71
KPTN	0.589328	7.62086	883.609	1.58944e-71
ARFIP2	0.589258	7.73666	459.573	1.12794e-86
SOBP	0.588928	7.59208	2114.1	6.05047e-91
TMEM8A	0.588413	7.7777	425.173	6.23857e-78
SLC22A18	0.588287	7.959	438.011	8.79601e-96
IER3	0.588009	9.79023	339.056	7.95508e-75
IVD	0.587902	7.82064	428.076	1.09926e-93
SPA17	0.587875	7.7079	460.309	3.09122e-75
PPIC	0.587839	8.36601	545.788	1.9765e-118
LENG1	0.587736	7.79337	426.471	7.90046e-93
CCDC141	0.587321	7.58839	2661.43	2.88117e-99
AC103691.1	0.587288	7.62184	800.998	2.53734e-63
DDX49	0.586849	7.74891	448.992	8.50537e-82
AGO1	0.586775	7.70457	470.222	1.46718e-75
HSD17B4	0.586492	7.79303	431.024	2.62276e-94
[truncated: 17,030 more rows]
